# Supplementary material
Source: publisher figshare collection journal article supplement (https://rs.figshare.com/ndownloader/files/23746908)
Supplement: Supplementary file 1 [file 23746908]

## Sheet: Table S2a  J.lineata RADtags
#Supplementary Table S2a. RADtags in Jenynsia lineata and their association with the direction of genital asymmetry based on PLINK.
#Columns A-E: output of the association mapping conducted in PLINK.
# CHR: RADtag name. RADtags were named by using the dDocent generated ID.
# SNP: The SNP ID referst to the physical position of the allelic variation in the specific RADtag
# perm.adj.P-value: Empirical p-value obtained from an adaptive permutation test based on the most significant result of ALLELIC, DOM and REC models
# NP: number of permutation replicas conducteed to determine EMP1
#p.BH.adj: P-value corrected for family-wise error for multiple testing using Benjamini-Hochberg false discovery rate
CHR	SNP	perm.adj.P-value	NP	p.BH.adj
dDocent_Contig_6187	54	0.0002308	153818	0.9449
dDocent_Contig_23390	153	0.0002533	138166	0.9449
dDocent_Contig_8873	77	0.0003614	96841	0.9449
dDocent_Contig_20226	7	0.0005465	64045	0.9449
dDocent_Contig_20226	100	0.0008598	41288	0.9449
dDocent_Contig_20226	172	0.0008598	41288	0.9449
dDocent_Contig_20226	196	0.0008598	41288	0.9449
dDocent_Contig_18185	243	0.000593	59865	0.9449
dDocent_Contig_4853	209	0.0006105	57326	0.9449
dDocent_Contig_3933	190	0.0006585	53148	0.9449
dDocent_Contig_8482	135	0.0006829	51981	0.9449
dDocent_Contig_8482	212	0.0006829	51981	0.9449
dDocent_Contig_8482	282	0.0006829	51981	0.9449
dDocent_Contig_8562	78	0.0007024	49825	0.9449
dDocent_Contig_22829	109	0.0007418	47181	0.9449
dDocent_Contig_8619	104	0.000781	44812	0.9449
dDocent_Contig_19631	90	0.0007818	44767	0.9449
dDocent_Contig_29120	206	0.0008633	41120	0.9449
dDocent_Contig_49559	14	0.0009591	36492	0.9449
dDocent_Contig_17029	20	0.001005	35327	0.9449
dDocent_Contig_16924	269	0.001005	35327	0.9449
dDocent_Contig_2512	23	0.001239	28661	0.9449
dDocent_Contig_1053	43	0.001239	28661	0.9449
dDocent_Contig_2512	225	0.001239	28661	0.9449
dDocent_Contig_8619	112	0.001307	26772	0.9449
dDocent_Contig_42153	84	0.001491	23474	0.9449
dDocent_Contig_51350	235	0.001522	22995	0.9449
dDocent_Contig_52897	12	0.001611	22029	0.9449
dDocent_Contig_52897	29	0.001611	22029	0.9449
dDocent_Contig_52897	81	0.001611	22029	0.9449
dDocent_Contig_52897	96	0.001611	22029	0.9449
dDocent_Contig_52897	134	0.001611	22029	0.9449
dDocent_Contig_59253	47	0.00166	21082	0.9449
dDocent_Contig_28413	130	0.001761	20155	0.9449
dDocent_Contig_36741	224	0.001789	19568	0.9449
dDocent_Contig_8482	15	0.001796	19488	0.9449
dDocent_Contig_22725	47	0.001894	18476	0.9449
dDocent_Contig_37787	125	0.001933	18362	0.9449
dDocent_Contig_17868	155	0.001933	18362	0.9449
dDocent_Contig_1871	14	0.001942	18020	0.9449
dDocent_Contig_36721	273	0.002036	17191	0.9449
dDocent_Contig_1475	119	0.002051	17065	0.9449
dDocent_Contig_54170	122	0.002108	16603	0.9449
dDocent_Contig_27395	269	0.002261	15480	0.9449
dDocent_Contig_25042	120	0.002266	15448	0.9449
dDocent_Contig_34437	106	0.00227	15640	0.9449
dDocent_Contig_8873	156	0.002381	14700	0.9449
dDocent_Contig_46525	255	0.002388	14865	0.9449
dDocent_Contig_17813	126	0.00246	14430	0.9449
dDocent_Contig_39203	26	0.00249	14055	0.9449
dDocent_Contig_39203	86	0.00249	14055	0.9449
dDocent_Contig_44646	95	0.002495	14025	0.9449
dDocent_Contig_44646	249	0.002495	14025	0.9449
dDocent_Contig_22752	86	0.002521	13884	0.9449
dDocent_Contig_25257	261	0.002596	13674	0.9449
dDocent_Contig_32006	179	0.002645	13422	0.9449
dDocent_Contig_33440	92	0.002775	12612	0.9449
dDocent_Contig_49190	178	0.002853	12443	0.9449
dDocent_Contig_26938	49	0.003063	11425	0.9449
dDocent_Contig_26459	68	0.003136	11161	0.9449
dDocent_Contig_30061	54	0.003288	10796	0.9449
dDocent_Contig_41833	154	0.003423	10224	0.9449
dDocent_Contig_24236	243	0.003423	10224	0.9449
dDocent_Contig_4318	46	0.00343	10202	0.9449
dDocent_Contig_33085	94	0.003491	10169	0.9449
dDocent_Contig_33085	138	0.003491	10169	0.9449
dDocent_Contig_26175	64	0.003498	10147	0.9449
dDocent_Contig_26782	162	0.003521	10081	0.9449
dDocent_Contig_3250	278	0.003523	9934	0.9449
dDocent_Contig_49896	28	0.003618	9674	0.9449
dDocent_Contig_5313	113	0.003618	9674	0.9449
dDocent_Contig_49896	132	0.003618	9674	0.9449
dDocent_Contig_29505	135	0.003618	9674	0.9449
dDocent_Contig_5313	154	0.003618	9674	0.9449
dDocent_Contig_49896	168	0.003618	9674	0.9449
dDocent_Contig_36694	170	0.003618	9674	0.9449
dDocent_Contig_5313	170	0.003618	9674	0.9449
dDocent_Contig_5313	179	0.003618	9674	0.9449
dDocent_Contig_49896	191	0.003618	9674	0.9449
dDocent_Contig_49896	197	0.003618	9674	0.9449
dDocent_Contig_49896	213	0.003618	9674	0.9449
dDocent_Contig_14002	29	0.003714	9424	0.9449
dDocent_Contig_14002	115	0.003714	9424	0.9449
dDocent_Contig_59253	110	0.003914	8941	0.9449
dDocent_Contig_30664	219	0.003954	8851	0.9449
dDocent_Contig_33392	243	0.00401	8851	0.9449
dDocent_Contig_24447	35	0.004095	8545	0.9449
dDocent_Contig_33194	43	0.004095	8545	0.9449
dDocent_Contig_33194	72	0.004095	8545	0.9449
dDocent_Contig_33194	116	0.004095	8545	0.9449
dDocent_Contig_21855	159	0.004239	8374	0.9449
dDocent_Contig_4102	105	0.004376	7997	0.9449
dDocent_Contig_13957	27	0.004456	7853	0.9449
dDocent_Contig_33440	85	0.00447	7941	0.9449
dDocent_Contig_33440	104	0.00447	7941	0.9449
dDocent_Contig_51350	165	0.004479	7813	0.9449
dDocent_Contig_31171	262	0.004516	7749	0.9449
dDocent_Contig_45020	46	0.00452	7853	0.9449
dDocent_Contig_29614	260	0.004727	7509	0.9449
dDocent_Contig_15972	240	0.004836	7133	0.9449
dDocent_Contig_11533	80	0.004908	7029	0.9449
dDocent_Contig_21206	252	0.004949	6970	0.9449
dDocent_Contig_46726	38	0.005077	6795	0.9449
dDocent_Contig_44087	161	0.005082	6886	0.9449
dDocent_Contig_50840	45	0.005145	6704	0.9449
dDocent_Contig_39234	10	0.0053	6508	0.9449
dDocent_Contig_36325	165	0.005366	6522	0.9449
dDocent_Contig_53330	23	0.00537	6424	0.9449
dDocent_Contig_53330	134	0.00537	6424	0.9449
dDocent_Contig_53330	216	0.00537	6424	0.9449
dDocent_Contig_53330	273	0.00537	6424	0.9449
dDocent_Contig_51948	107	0.005569	6284	0.9449
dDocent_Contig_51948	180	0.005569	6284	0.9449
dDocent_Contig_51948	269	0.005569	6284	0.9449
dDocent_Contig_24747	53	0.005595	6165	0.9449
dDocent_Contig_24747	73	0.005595	6165	0.9449
dDocent_Contig_24747	166	0.005595	6165	0.9449
dDocent_Contig_24747	213	0.005595	6165	0.9449
dDocent_Contig_24747	231	0.005595	6165	0.9449
dDocent_Contig_12514	97	0.005621	6137	0.9449
dDocent_Contig_18435	158	0.005686	6067	0.9449
dDocent_Contig_46723	166	0.005745	6004	0.9449
dDocent_Contig_29255	19	0.005757	5992	0.9449
dDocent_Contig_41672	38	0.005827	5920	0.9449
dDocent_Contig_41672	122	0.005827	5920	0.9449
dDocent_Contig_11199	198	0.005868	5878	0.9449
dDocent_Contig_11199	274	0.005868	5878	0.9449
dDocent_Contig_17922	177	0.00593	5986	0.9449
dDocent_Contig_57711	273	0.00593	5986	0.9449
dDocent_Contig_28103	26	0.006122	5716	0.9449
dDocent_Contig_41901	220	0.006171	5590	0.9449
dDocent_Contig_27789	263	0.006184	5578	0.9449
dDocent_Contig_37986	93	0.006251	5518	0.9449
dDocent_Contig_44515	186	0.006251	5518	0.9449
dDocent_Contig_25257	236	0.006251	5518	0.9449
dDocent_Contig_37986	311	0.006251	5518	0.9449
dDocent_Contig_3422	7	0.006519	5368	0.9449
dDocent_Contig_57117	37	0.006528	5284	0.9449
dDocent_Contig_506	111	0.006626	5206	0.9449
dDocent_Contig_3865	22	0.006695	5152	0.9449
dDocent_Contig_25752	234	0.006734	5122	0.9449
dDocent_Contig_13874	94	0.006822	5056	0.9449
dDocent_Contig_13874	209	0.006822	5056	0.9449
dDocent_Contig_48460	235	0.006832	5122	0.9449
dDocent_Contig_40493	24	0.006913	5062	0.9449
dDocent_Contig_20581	160	0.007044	4897	0.9449
dDocent_Contig_41210	208	0.007044	4897	0.9449
dDocent_Contig_15744	84	0.007228	4772	0.9449
dDocent_Contig_506	178	0.007383	4672	0.9449
dDocent_Contig_3292	157	0.007407	4657	0.9449
dDocent_Contig_37640	30	0.007463	4622	0.9449
dDocent_Contig_3977	168	0.007487	4607	0.9449
dDocent_Contig_16890	30	0.00752	4587	0.9449
dDocent_Contig_506	205	0.00762	4592	0.9449
dDocent_Contig_43526	38	0.007645	4577	0.9449
dDocent_Contig_848	133	0.007654	4572	0.9449
dDocent_Contig_21195	188	0.007679	4492	0.9449
dDocent_Contig_30063	33	0.007844	4397	0.9449
dDocent_Contig_30063	135	0.007844	4397	0.9449
dDocent_Contig_30063	156	0.007844	4397	0.9449
dDocent_Contig_30063	177	0.007844	4397	0.9449
dDocent_Contig_30063	192	0.007844	4397	0.9449
dDocent_Contig_41248	265	0.007844	4397	0.9449
dDocent_Contig_10432	90	0.00786	4452	0.9449
dDocent_Contig_59253	52	0.007886	4437	0.9449
dDocent_Contig_59253	101	0.007886	4437	0.9449
dDocent_Contig_41814	224	0.007926	4352	0.9449
dDocent_Contig_17006	249	0.007958	4397	0.9449
dDocent_Contig_17006	255	0.007958	4397	0.9449
dDocent_Contig_2720	173	0.008027	4297	0.9449
dDocent_Contig_27403	234	0.008036	4292	0.9449
dDocent_Contig_41248	91	0.008189	4212	0.9449
dDocent_Contig_20284	16	0.008238	4187	0.9449
dDocent_Contig_3407	116	0.008248	4182	0.9449
dDocent_Contig_56203	56	0.008249	4242	0.9449
dDocent_Contig_6130	65	0.008388	4112	0.9449
dDocent_Contig_21391	76	0.008388	4112	0.9449
dDocent_Contig_21391	88	0.008388	4112	0.9449
dDocent_Contig_21391	152	0.008388	4112	0.9449
dDocent_Contig_21391	186	0.008388	4112	0.9449
dDocent_Contig_21391	232	0.008388	4112	0.9449
dDocent_Contig_21391	239	0.008388	4112	0.9449
dDocent_Contig_30738	210	0.00845	4082	0.9449
dDocent_Contig_56937	16	0.008458	4137	0.9449
dDocent_Contig_39470	104	0.00851	4112	0.9449
dDocent_Contig_4351	121	0.008627	3998	0.9449
dDocent_Contig_4351	220	0.008627	3998	0.9449
dDocent_Contig_4351	225	0.008627	3998	0.9449
dDocent_Contig_21855	265	0.008679	4147	0.9449
dDocent_Contig_13436	37	0.008706	3962	0.9449
dDocent_Contig_35933	41	0.008706	3962	0.9449
dDocent_Contig_34306	59	0.008706	3962	0.9449
dDocent_Contig_13436	64	0.008706	3962	0.9449
dDocent_Contig_54786	78	0.008706	3962	0.9449
dDocent_Contig_1305	120	0.008706	3962	0.9449
dDocent_Contig_35058	158	0.008706	3962	0.9449
dDocent_Contig_31417	161	0.008706	3962	0.9449
dDocent_Contig_15845	260	0.008722	4012	0.9449
dDocent_Contig_6416	238	0.008752	3998	0.9449
dDocent_Contig_373	81	0.008785	3926	0.9449
dDocent_Contig_12856	288	0.008839	3902	0.9449
dDocent_Contig_26896	230	0.009005	3830	0.9449
dDocent_Contig_14756	157	0.009014	3882	0.9449
dDocent_Contig_14756	181	0.009014	3882	0.9449
dDocent_Contig_14756	282	0.009014	3882	0.9449
dDocent_Contig_23416	96	0.009031	3930	0.9449
dDocent_Contig_23416	124	0.009031	3930	0.9449
dDocent_Contig_23080	172	0.009034	3818	0.9449
dDocent_Contig_23080	220	0.009034	3818	0.9449
dDocent_Contig_2279	216	0.009158	3766	0.9449
dDocent_Contig_2279	225	0.009158	3766	0.9449
dDocent_Contig_39979	44	0.009272	3774	0.9449
dDocent_Contig_39979	61	0.009272	3774	0.9449
dDocent_Contig_39979	152	0.009272	3774	0.9449
dDocent_Contig_39979	188	0.009272	3774	0.9449
dDocent_Contig_39979	274	0.009272	3774	0.9449
dDocent_Contig_5659	133	0.00946	3646	0.9449
dDocent_Contig_12856	91	0.009544	3614	0.9449
dDocent_Contig_427	28	0.009618	3586	0.9449
dDocent_Contig_7604	176	0.009694	3558	0.9449
dDocent_Contig_5081	34	0.009716	3550	0.9449
dDocent_Contig_7807	50	0.009812	3566	0.9449
dDocent_Contig_12347	91	0.009912	3530	0.9449
dDocent_Contig_36495	185	0.009912	3530	0.9449
dDocent_Contig_19413	198	0.009912	3530	0.9449
dDocent_Contig_28284	203	0.009912	3530	0.9449
dDocent_Contig_39209	157	0.009939	3470	0.9449
dDocent_Contig_2279	210	0.01001	3446	0.9449
dDocent_Contig_22874	205	0.01013	3406	0.9449
dDocent_Contig_1488	256	0.01018	3438	0.9449
dDocent_Contig_44583	85	0.01025	3414	0.9449
dDocent_Contig_31098	58	0.0103	3350	0.9449
dDocent_Contig_29378	171	0.01042	3310	0.9449
dDocent_Contig_18790	269	0.01047	3294	0.9449
dDocent_Contig_13154	262	0.01067	3278	0.9449
dDocent_Contig_34541	274	0.0107	3270	0.9449
dDocent_Contig_54523	95	0.01081	3190	0.9449
dDocent_Contig_29245	82	0.0109	3210	0.9449
dDocent_Contig_29245	156	0.0109	3210	0.9449
dDocent_Contig_19963	240	0.01093	3202	0.9449
dDocent_Contig_19963	274	0.01093	3202	0.9449
dDocent_Contig_18287	42	0.01101	3178	0.9449
dDocent_Contig_13409	239	0.01108	3114	0.9449
dDocent_Contig_14549	41	0.01109	3154	0.9449
dDocent_Contig_12514	244	0.01115	3138	0.9449
dDocent_Contig_41054	65	0.01131	3094	0.9449
dDocent_Contig_41054	167	0.01131	3094	0.9449
dDocent_Contig_22736	17	0.01137	3034	0.9449
dDocent_Contig_11533	24	0.01137	3034	0.9449
dDocent_Contig_5679	32	0.01137	3034	0.9449
dDocent_Contig_30386	49	0.01137	3034	0.9449
dDocent_Contig_27979	52	0.01137	3034	0.9449
dDocent_Contig_27979	57	0.01137	3034	0.9449
dDocent_Contig_11160	59	0.01137	3034	0.9449
dDocent_Contig_3845	60	0.01137	3034	0.9449
dDocent_Contig_27979	62	0.01137	3034	0.9449
dDocent_Contig_42603	86	0.01137	3034	0.9449
dDocent_Contig_5679	90	0.01137	3034	0.9449
dDocent_Contig_11160	97	0.01137	3034	0.9449
dDocent_Contig_54170	109	0.01137	3034	0.9449
dDocent_Contig_11160	116	0.01137	3034	0.9449
dDocent_Contig_5679	121	0.01137	3034	0.9449
dDocent_Contig_5679	129	0.01137	3034	0.9449
dDocent_Contig_11160	130	0.01137	3034	0.9449
dDocent_Contig_5679	136	0.01137	3034	0.9449
dDocent_Contig_49948	158	0.01137	3034	0.9449
dDocent_Contig_5679	161	0.01137	3034	0.9449
dDocent_Contig_35963	170	0.01137	3034	0.9449
dDocent_Contig_3845	171	0.01137	3034	0.9449
dDocent_Contig_51350	176	0.01137	3034	0.9449
dDocent_Contig_5679	183	0.01137	3034	0.9449
dDocent_Contig_5679	213	0.01137	3034	0.9449
dDocent_Contig_16217	214	0.01137	3034	0.9449
dDocent_Contig_3845	223	0.01137	3034	0.9449
dDocent_Contig_11160	241	0.01137	3034	0.9449
dDocent_Contig_23653	242	0.01137	3034	0.9449
dDocent_Contig_11160	267	0.01137	3034	0.9449
dDocent_Contig_3845	281	0.01137	3034	0.9449
dDocent_Contig_6703	35	0.01144	3058	0.9449
dDocent_Contig_7702	217	0.01159	2975	0.9449
dDocent_Contig_26932	7	0.01164	3006	0.9449
dDocent_Contig_8809	7	0.01176	2975	0.9449
dDocent_Contig_23631	164	0.01181	2963	0.9449
dDocent_Contig_32616	160	0.01183	2957	0.9449
dDocent_Contig_14800	27	0.01187	2948	0.9449
dDocent_Contig_14800	210	0.01187	2948	0.9449
dDocent_Contig_3804	31	0.01211	2888	0.9449
dDocent_Contig_7142	54	0.01211	2888	0.9449
dDocent_Contig_3804	64	0.01211	2888	0.9449
dDocent_Contig_3804	69	0.01211	2888	0.9449
dDocent_Contig_3804	109	0.01211	2888	0.9449
dDocent_Contig_13661	128	0.01211	2888	0.9449
dDocent_Contig_11116	182	0.01211	2888	0.9449
dDocent_Contig_38652	209	0.01211	2888	0.9449
dDocent_Contig_11116	228	0.01211	2888	0.9449
dDocent_Contig_3804	241	0.01211	2888	0.9449
dDocent_Contig_7142	248	0.01211	2888	0.9449
dDocent_Contig_3804	250	0.01211	2888	0.9449
dDocent_Contig_11116	276	0.01211	2888	0.9449
dDocent_Contig_3804	278	0.01211	2888	0.9449
dDocent_Contig_33969	206	0.01219	2870	0.9449
dDocent_Contig_46041	52	0.0122	2828	0.9449
dDocent_Contig_40936	174	0.01222	2822	0.9449
dDocent_Contig_38676	213	0.01231	2801	0.9449
dDocent_Contig_38676	253	0.01231	2801	0.9449
dDocent_Contig_43529	8	0.01261	2774	0.9449
dDocent_Contig_7823	55	0.01265	2726	0.9449
dDocent_Contig_3602	56	0.01265	2726	0.9449
dDocent_Contig_7823	62	0.01265	2726	0.9449
dDocent_Contig_7823	88	0.01265	2726	0.9449
dDocent_Contig_7823	119	0.01265	2726	0.9449
dDocent_Contig_3602	282	0.01265	2726	0.9449
dDocent_Contig_1094	251	0.01271	2714	0.9449
dDocent_Contig_59060	251	0.01274	2747	0.9449
dDocent_Contig_43860	156	0.01276	2741	0.9449
dDocent_Contig_5223	46	0.01282	2690	0.9449
dDocent_Contig_18192	100	0.01285	2723	0.9449
dDocent_Contig_23774	22	0.01298	2696	0.9449
dDocent_Contig_49002	38	0.01298	2696	0.9449
dDocent_Contig_427	156	0.01304	2759	0.9449
dDocent_Contig_7314	258	0.01307	2639	0.9449
dDocent_Contig_49077	271	0.01312	2666	0.9449
dDocent_Contig_1761	171	0.01314	2663	0.9449
dDocent_Contig_1761	264	0.01314	2663	0.9449
dDocent_Contig_18885	68	0.01324	2642	0.9449
dDocent_Contig_42629	136	0.01334	2585	0.9449
dDocent_Contig_10444	69	0.01345	2564	0.9449
dDocent_Contig_4011	262	0.01361	2570	0.9449
dDocent_Contig_7382	57	0.01367	2522	0.9449
dDocent_Contig_40848	75	0.01367	2522	0.9449
dDocent_Contig_5268	24	0.01377	2504	0.9449
dDocent_Contig_20074	100	0.01377	2504	0.9449
dDocent_Contig_33232	104	0.01377	2504	0.9449
dDocent_Contig_51087	110	0.01377	2504	0.9449
dDocent_Contig_5268	130	0.01377	2504	0.9449
dDocent_Contig_45255	171	0.01377	2504	0.9449
dDocent_Contig_29012	200	0.01377	2504	0.9449
dDocent_Contig_21963	216	0.01377	2504	0.9449
dDocent_Contig_34996	220	0.01377	2504	0.9449
dDocent_Contig_2069	232	0.01377	2504	0.9449
dDocent_Contig_2053	169	0.01384	2492	0.9449
dDocent_Contig_10432	181	0.01386	2489	0.9449
dDocent_Contig_13272	232	0.01387	2486	0.9449
dDocent_Contig_52506	245	0.01387	2486	0.9449
dDocent_Contig_22802	126	0.01397	2504	0.9449
dDocent_Contig_22802	235	0.01397	2504	0.9449
dDocent_Contig_21476	72	0.01399	2501	0.9449
dDocent_Contig_17256	109	0.01399	2501	0.9449
dDocent_Contig_41210	61	0.01404	2492	0.9449
dDocent_Contig_22318	212	0.01419	2465	0.9449
dDocent_Contig_50192	15	0.01425	2456	0.9449
dDocent_Contig_84	50	0.0143	2411	0.9449
dDocent_Contig_17572	273	0.01441	2393	0.9449
dDocent_Contig_31162	34	0.01445	2387	0.9449
dDocent_Contig_31162	40	0.01445	2387	0.9449
dDocent_Contig_38660	53	0.01445	2387	0.9449
dDocent_Contig_38660	94	0.01445	2387	0.9449
dDocent_Contig_29615	157	0.01445	2387	0.9449
dDocent_Contig_31162	221	0.01445	2387	0.9449
dDocent_Contig_29615	264	0.01445	2387	0.9449
dDocent_Contig_3977	195	0.01446	2420	0.9449
dDocent_Contig_3977	277	0.01446	2420	0.9449
dDocent_Contig_27395	12	0.01451	2411	0.9449
dDocent_Contig_7142	120	0.01458	2399	0.9449
dDocent_Contig_7030	73	0.01469	2381	0.9449
dDocent_Contig_7030	105	0.01469	2381	0.9449
dDocent_Contig_46308	37	0.01477	2369	0.9449
dDocent_Contig_46308	232	0.01477	2369	0.9449
dDocent_Contig_10036	256	0.01481	2363	0.9449
dDocent_Contig_10036	280	0.01481	2363	0.9449
dDocent_Contig_15509	168	0.01484	2357	0.9449
dDocent_Contig_56361	269	0.01484	2324	0.9449
dDocent_Contig_13299	264	0.01488	2318	0.9449
dDocent_Contig_3977	17	0.0149	2348	0.9449
dDocent_Contig_48300	182	0.0149	2348	0.9449
dDocent_Contig_33903	87	0.01507	2321	0.9449
dDocent_Contig_139	98	0.01513	2279	0.9449
dDocent_Contig_4906	184	0.01517	2306	0.9449
dDocent_Contig_28072	134	0.01519	2303	0.9449
dDocent_Contig_28072	139	0.01519	2303	0.9449
dDocent_Contig_28072	226	0.01521	2267	0.9449
dDocent_Contig_37737	131	0.01531	2252	0.9449
dDocent_Contig_13192	179	0.01531	2252	0.9449
dDocent_Contig_13192	188	0.01531	2252	0.9449
dDocent_Contig_5707	97	0.01548	2228	0.9449
dDocent_Contig_26031	85	0.01549	2258	0.9449
dDocent_Contig_26031	133	0.01549	2258	0.9449
dDocent_Contig_41814	20	0.01554	2219	0.9449
dDocent_Contig_24957	25	0.01554	2219	0.9449
dDocent_Contig_27	30	0.01554	2219	0.9449
dDocent_Contig_4625	36	0.01554	2219	0.9449
dDocent_Contig_51127	90	0.01554	2219	0.9449
dDocent_Contig_37625	104	0.01554	2219	0.9449
dDocent_Contig_31044	126	0.01554	2219	0.9449
dDocent_Contig_37625	128	0.01554	2219	0.9449
dDocent_Contig_41814	128	0.01554	2219	0.9449
dDocent_Contig_21196	156	0.01554	2219	0.9449
dDocent_Contig_10686	160	0.01554	2219	0.9449
dDocent_Contig_39756	170	0.01554	2219	0.9449
dDocent_Contig_6641	178	0.01554	2219	0.9449
dDocent_Contig_41814	179	0.01554	2219	0.9449
dDocent_Contig_18729	180	0.01554	2219	0.9449
dDocent_Contig_9309	191	0.01554	2219	0.9449
dDocent_Contig_666	202	0.01554	2219	0.9449
dDocent_Contig_31044	206	0.01554	2219	0.9449
dDocent_Contig_31302	221	0.01554	2219	0.9449
dDocent_Contig_18272	231	0.01554	2219	0.9449
dDocent_Contig_52832	261	0.01554	2219	0.9449
dDocent_Contig_11439	265	0.01554	2219	0.9449
dDocent_Contig_31302	275	0.01554	2219	0.9449
dDocent_Contig_41814	284	0.01554	2219	0.9449
dDocent_Contig_39227	197	0.01556	2216	0.9449
dDocent_Contig_39227	281	0.01556	2216	0.9449
dDocent_Contig_3425	155	0.01558	2213	0.9449
dDocent_Contig_11602	13	0.0156	2210	0.9449
dDocent_Contig_3383	134	0.0156	2210	0.9449
dDocent_Contig_36266	155	0.0156	2210	0.9449
dDocent_Contig_19125	59	0.01567	2201	0.9449
dDocent_Contig_19125	80	0.01567	2201	0.9449
dDocent_Contig_19125	95	0.01567	2201	0.9449
dDocent_Contig_29120	175	0.01569	2198	0.9449
dDocent_Contig_8482	206	0.01577	2219	0.9449
dDocent_Contig_8482	217	0.01577	2219	0.9449
dDocent_Contig_22650	182	0.01582	2180	0.9449
dDocent_Contig_20305	22	0.01586	2174	0.9449
dDocent_Contig_20305	50	0.01586	2174	0.9449
dDocent_Contig_17112	176	0.01597	2159	0.9449
dDocent_Contig_10559	209	0.01615	2135	0.9449
dDocent_Contig_17952	219	0.01631	2114	0.9449
dDocent_Contig_44087	130	0.01634	2111	0.9449
dDocent_Contig_846	111	0.01636	2108	0.9449
dDocent_Contig_44297	104	0.0165	2120	0.9659
dDocent_Contig_5602	119	0.0165	2120	0.9659
dDocent_Contig_50192	34	0.01657	2111	0.9659
dDocent_Contig_31321	76	0.0166	2108	0.9659
dDocent_Contig_41210	77	0.0166	2108	0.9659
dDocent_Contig_7957	96	0.01662	2075	0.9659
dDocent_Contig_11602	43	0.01664	2072	0.9659
dDocent_Contig_11349	101	0.01669	2066	0.9659
dDocent_Contig_12099	202	0.01669	2066	0.9659
dDocent_Contig_58028	36	0.01686	2045	0.9659
dDocent_Contig_4663	299	0.01693	2066	0.9659
dDocent_Contig_17238	49	0.01719	2006	0.9659
dDocent_Contig_19981	167	0.01719	2006	0.9659
dDocent_Contig_5136	234	0.01719	2006	0.9659
dDocent_Contig_46682	25	0.01736	1986	0.9659
dDocent_Contig_33725	108	0.01739	2012	0.9659
dDocent_Contig_54170	62	0.0174	1982	0.9659
dDocent_Contig_36836	35	0.01754	1994	0.9751
dDocent_Contig_36836	131	0.01754	1994	0.9751
dDocent_Contig_35057	215	0.01758	1990	0.9751
dDocent_Contig_59253	62	0.01767	1980	0.9751
dDocent_Contig_24539	286	0.0177	1948	0.9751
dDocent_Contig_25884	118	0.01774	1944	0.9751
dDocent_Contig_36075	268	0.01781	1936	0.9751
dDocent_Contig_31425	63	0.01811	1904	0.9751
dDocent_Contig_16394	59	0.01817	1898	0.9751
dDocent_Contig_22139	165	0.01817	1898	0.9751
dDocent_Contig_22139	193	0.01817	1898	0.9751
dDocent_Contig_4761	136	0.01839	1902	0.9751
dDocent_Contig_4761	188	0.01839	1902	0.9751
dDocent_Contig_4761	199	0.01839	1902	0.9751
dDocent_Contig_4761	218	0.01839	1902	0.9751
dDocent_Contig_1370	311	0.01839	1902	0.9751
dDocent_Contig_28288	205	0.0184	1874	0.9751
dDocent_Contig_9926	280	0.0185	1864	0.9751
dDocent_Contig_2253	267	0.01852	1862	0.9751
dDocent_Contig_846	82	0.01856	1858	0.9751
dDocent_Contig_1764	13	0.01858	1856	0.9751
dDocent_Contig_1764	59	0.01858	1856	0.9751
dDocent_Contig_1764	117	0.01858	1856	0.9751
dDocent_Contig_1764	253	0.01858	1856	0.9751
dDocent_Contig_1764	267	0.01858	1856	0.9751
dDocent_Contig_32653	139	0.0186	1854	0.9751
dDocent_Contig_32653	195	0.0186	1854	0.9751
dDocent_Contig_32653	271	0.0186	1854	0.9751
dDocent_Contig_20737	226	0.01865	1876	0.9751
dDocent_Contig_11091	164	0.01874	1840	0.9751
dDocent_Contig_18415	282	0.01875	1866	0.9751
dDocent_Contig_16085	224	0.01885	1856	0.9751
dDocent_Contig_17441	170	0.01889	1852	0.9751
dDocent_Contig_36075	107	0.01891	1850	0.9751
dDocent_Contig_25951	99	0.01907	1808	0.9751
dDocent_Contig_25951	155	0.01907	1808	0.9751
dDocent_Contig_4454	232	0.01907	1834	0.9751
dDocent_Contig_28944	67	0.01913	1802	0.9751
dDocent_Contig_13015	34	0.01918	1798	0.9751
dDocent_Contig_9586	214	0.0192	1796	0.9751
dDocent_Contig_9586	258	0.0192	1796	0.9751
dDocent_Contig_33233	23	0.01931	1812	0.9751
dDocent_Contig_24910	119	0.01937	1806	0.9751
dDocent_Contig_24910	206	0.01937	1806	0.9751
dDocent_Contig_43716	7	0.01941	1776	0.9751
dDocent_Contig_43716	249	0.01941	1776	0.9751
dDocent_Contig_41983	138	0.01946	1772	0.9751
dDocent_Contig_28998	154	0.01948	1796	0.9751
dDocent_Contig_7309	57	0.01956	1788	0.9866
dDocent_Contig_7309	104	0.01956	1788	0.9866
dDocent_Contig_7309	128	0.01956	1788	0.9866
dDocent_Contig_11594	157	0.01956	1788	0.9866
dDocent_Contig_7309	226	0.01956	1788	0.9866
dDocent_Contig_14168	225	0.01957	1736	0.9866
dDocent_Contig_14168	283	0.01957	1736	0.9866
dDocent_Contig_4534	20	0.01959	1760	0.9866
dDocent_Contig_19220	49	0.01987	1710	0.9866
dDocent_Contig_9674	185	0.01987	1710	0.9866
dDocent_Contig_47529	282	0.01992	1706	0.9866
dDocent_Contig_29206	48	0.01999	1750	0.9866
dDocent_Contig_33176	252	0.01999	1700	0.9866
dDocent_Contig_25955	250	0.02001	1698	0.9866
dDocent_Contig_19798	210	0.02002	1722	0.9866
dDocent_Contig_27453	55	0.0201	1740	0.9866
dDocent_Contig_27453	113	0.0201	1740	0.9866
dDocent_Contig_42681	50	0.02013	1688	0.9866
dDocent_Contig_47506	260	0.02023	1704	0.9866
dDocent_Contig_33924	46	0.02047	1684	0.9866
dDocent_Contig_26144	358	0.02059	1650	1
dDocent_Contig_9259	14	0.02069	1642	1
dDocent_Contig_9259	120	0.02069	1642	1
dDocent_Contig_9259	197	0.02069	1642	1
dDocent_Contig_9259	286	0.02069	1642	1
dDocent_Contig_31278	193	0.02097	1620	1
dDocent_Contig_52879	13	0.02116	1606	1
dDocent_Contig_52879	41	0.02116	1606	1
dDocent_Contig_9353	245	0.02118	1628	1
dDocent_Contig_34584	224	0.02123	1624	1
dDocent_Contig_15774	21	0.02129	1596	1
dDocent_Contig_15774	118	0.02129	1596	1
dDocent_Contig_54676	41	0.02132	1594	1
dDocent_Contig_30947	283	0.02137	1590	1
dDocent_Contig_24918	126	0.0216	1596	1
dDocent_Contig_29982	205	0.02164	1570	1
dDocent_Contig_37967	22	0.02167	1568	1
dDocent_Contig_37967	113	0.02167	1568	1
dDocent_Contig_25604	37	0.0217	1566	1
dDocent_Contig_15176	211	0.0217	1566	1
dDocent_Contig_46353	225	0.02174	1586	1
dDocent_Contig_7024	202	0.02178	1560	1
dDocent_Contig_23578	287	0.02181	1558	1
dDocent_Contig_12975	32	0.02203	1542	1
dDocent_Contig_38819	97	0.02207	1562	1
dDocent_Contig_4201	175	0.02213	1558	1
dDocent_Contig_25815	190	0.02213	1558	1
dDocent_Contig_7725	263	0.0223	1524	1
dDocent_Contig_49164	225	0.02232	1522	1
dDocent_Contig_56937	158	0.02235	1520	1
dDocent_Contig_3507	165	0.02235	1520	1
dDocent_Contig_5822	137	0.02265	1500	1
dDocent_Contig_2295	175	0.02274	1494	1
dDocent_Contig_2295	276	0.02274	1494	1
dDocent_Contig_19136	73	0.0228	1490	1
dDocent_Contig_3292	177	0.02299	1478	1
dDocent_Contig_43928	76	0.02326	1482	1
dDocent_Contig_29191	180	0.02327	1460	1
dDocent_Contig_22571	261	0.02327	1460	1
dDocent_Contig_15857	211	0.02339	1474	1
dDocent_Contig_8283	60	0.02342	1472	1
dDocent_Contig_8283	252	0.02342	1472	1
dDocent_Contig_1740	203	0.02345	1470	1
dDocent_Contig_1740	208	0.02345	1470	1
dDocent_Contig_19270	122	0.02352	1466	1
dDocent_Contig_30407	42	0.02353	1444	1
dDocent_Contig_30407	56	0.02353	1444	1
dDocent_Contig_15585	28	0.02355	1464	1
dDocent_Contig_48509	172	0.02356	1442	1
dDocent_Contig_38102	27	0.02359	1440	1
dDocent_Contig_44292	164	0.02369	1434	1
dDocent_Contig_13091	16	0.02379	1428	1
dDocent_Contig_49066	15	0.02388	1444	1
dDocent_Contig_45280	30	0.02397	1438	1
dDocent_Contig_46889	82	0.02397	1438	1
dDocent_Contig_26992	104	0.02397	1438	1
dDocent_Contig_45280	249	0.02397	1438	1
dDocent_Contig_59253	90	0.02399	1416	1
dDocent_Contig_47354	203	0.02403	1414	1
dDocent_Contig_25170	137	0.02416	1406	1
dDocent_Contig_36195	231	0.02416	1406	1
dDocent_Contig_28043	87	0.0243	1398	1
dDocent_Contig_36107	243	0.02431	1418	1
dDocent_Contig_12302	187	0.02437	1394	1
dDocent_Contig_49421	159	0.02441	1392	1
dDocent_Contig_4419	7	0.02456	1404	1
dDocent_Contig_4419	53	0.02456	1404	1
dDocent_Contig_22375	201	0.02463	1400	1
dDocent_Contig_52706	34	0.02466	1378	1
dDocent_Contig_52706	120	0.02466	1378	1
dDocent_Contig_6130	137	0.02466	1378	1
dDocent_Contig_1174	141	0.02466	1378	1
dDocent_Contig_20659	38	0.02473	1374	1
dDocent_Contig_24135	163	0.02473	1394	1
dDocent_Contig_40269	198	0.02506	1356	1
dDocent_Contig_47955	209	0.02506	1356	1
dDocent_Contig_25467	200	0.02509	1354	1
dDocent_Contig_2836	29	0.02551	1332	1
dDocent_Contig_2836	119	0.02551	1332	1
dDocent_Contig_43840	261	0.02561	1346	1
dDocent_Contig_3933	46	0.02569	1342	1
dDocent_Contig_3933	88	0.02569	1342	1
dDocent_Contig_3933	276	0.02569	1342	1
dDocent_Contig_41873	70	0.02582	1316	1
dDocent_Contig_41873	110	0.02582	1316	1
dDocent_Contig_29354	45	0.02593	1310	1
dDocent_Contig_33682	109	0.02593	1310	1
dDocent_Contig_12242	163	0.02593	1310	1
dDocent_Contig_29354	196	0.02593	1310	1
dDocent_Contig_29354	236	0.02593	1310	1
dDocent_Contig_38230	176	0.02601	1306	1
dDocent_Contig_52573	93	0.02605	1362	1
dDocent_Contig_26938	17	0.02608	1322	1
dDocent_Contig_26938	44	0.02608	1322	1
dDocent_Contig_26938	85	0.02608	1322	1
dDocent_Contig_26938	114	0.02608	1322	1
dDocent_Contig_18493	23	0.02616	1318	1
dDocent_Contig_30386	76	0.02616	1318	1
dDocent_Contig_30386	160	0.02616	1318	1
dDocent_Contig_18493	226	0.02616	1318	1
dDocent_Contig_33173	77	0.02621	1296	1
dDocent_Contig_15202	226	0.02621	1296	1
dDocent_Contig_18674	47	0.02625	1294	1
dDocent_Contig_18674	169	0.02625	1294	1
dDocent_Contig_28483	94	0.0265	1282	1
dDocent_Contig_2705	72	0.02654	1280	1
dDocent_Contig_31753	152	0.02662	1276	1
dDocent_Contig_48050	60	0.02671	1272	1
dDocent_Contig_12812	190	0.02676	1288	1
dDocent_Contig_10410	255	0.02676	1288	1
dDocent_Contig_25193	225	0.02679	1324	1
dDocent_Contig_23280	194	0.02693	1280	1
dDocent_Contig_35432	38	0.02705	1256	1
dDocent_Contig_30664	128	0.02705	1256	1
dDocent_Contig_22381	54	0.02706	1274	1
dDocent_Contig_22381	79	0.02706	1274	1
dDocent_Contig_22381	95	0.02706	1274	1
dDocent_Contig_42132	96	0.02709	1254	1
dDocent_Contig_28311	8	0.0271	1272	1
dDocent_Contig_28311	16	0.0271	1272	1
dDocent_Contig_28311	111	0.0271	1272	1
dDocent_Contig_33342	9	0.02718	1250	1
dDocent_Contig_33342	139	0.02718	1250	1
dDocent_Contig_33342	171	0.02718	1250	1
dDocent_Contig_33342	201	0.02718	1250	1
dDocent_Contig_33342	216	0.02718	1250	1
dDocent_Contig_30738	257	0.02723	1266	1
dDocent_Contig_44351	109	0.02735	1242	1
dDocent_Contig_8425	133	0.02735	1242	1
dDocent_Contig_20741	43	0.02749	1254	1
dDocent_Contig_19929	69	0.02749	1254	1
dDocent_Contig_48677	55	0.02771	1244	1
dDocent_Contig_37912	78	0.0278	1222	1
dDocent_Contig_38172	153	0.02785	1238	1
dDocent_Contig_215	288	0.02789	1236	1
dDocent_Contig_14675	19	0.02794	1234	1
dDocent_Contig_28606	80	0.02798	1232	1
dDocent_Contig_3069	181	0.02816	1224	1
dDocent_Contig_582	132	0.02817	1206	1
dDocent_Contig_36146	232	0.02817	1206	1
dDocent_Contig_36146	275	0.02817	1206	1
dDocent_Contig_25734	59	0.02821	1222	1
dDocent_Contig_26703	34	0.02826	1220	1
dDocent_Contig_5924	57	0.02826	1202	1
dDocent_Contig_36727	57	0.02835	1216	1
dDocent_Contig_26737	187	0.0284	1196	1
dDocent_Contig_7530	20	0.02863	1204	1
dDocent_Contig_9952	13	0.02864	1186	1
dDocent_Contig_9952	154	0.02864	1186	1
dDocent_Contig_9952	224	0.02864	1186	1
dDocent_Contig_50	203	0.02868	1202	1
dDocent_Contig_50	278	0.02868	1202	1
dDocent_Contig_29172	113	0.02873	1200	1
dDocent_Contig_38641	24	0.02884	1178	1
dDocent_Contig_8547	115	0.02884	1178	1
dDocent_Contig_8547	131	0.02884	1178	1
dDocent_Contig_8547	188	0.02884	1178	1
dDocent_Contig_8547	196	0.02884	1178	1
dDocent_Contig_38641	226	0.02884	1178	1
dDocent_Contig_6848	209	0.02887	1194	1
dDocent_Contig_6848	218	0.02887	1194	1
dDocent_Contig_846	121	0.02899	1172	1
dDocent_Contig_846	131	0.02899	1172	1
dDocent_Contig_25042	18	0.02904	1170	1
dDocent_Contig_31011	68	0.02911	1184	1
dDocent_Contig_36261	30	0.02921	1180	1
dDocent_Contig_48008	281	0.02921	1180	1
dDocent_Contig_50164	281	0.02923	1162	1
dDocent_Contig_33176	276	0.02926	1178	1
dDocent_Contig_4397	223	0.02949	1152	1
dDocent_Contig_14748	20	0.02959	1148	1
dDocent_Contig_14748	74	0.02959	1148	1
dDocent_Contig_14748	86	0.02959	1148	1
dDocent_Contig_14748	129	0.02959	1148	1
dDocent_Contig_14748	177	0.02959	1148	1
dDocent_Contig_14748	213	0.02959	1148	1
dDocent_Contig_12576	217	0.02959	1148	1
dDocent_Contig_14748	231	0.02959	1148	1
dDocent_Contig_14748	278	0.02959	1148	1
dDocent_Contig_31317	92	0.02969	1144	1
dDocent_Contig_43284	95	0.02969	1144	1
dDocent_Contig_46686	110	0.02969	1144	1
dDocent_Contig_3752	131	0.02969	1144	1
dDocent_Contig_2508	219	0.02969	1144	1
dDocent_Contig_22686	255	0.02969	1144	1
dDocent_Contig_26916	110	0.02982	1156	1
dDocent_Contig_26916	276	0.02982	1156	1
dDocent_Contig_27879	16	0.03013	1144	1
dDocent_Contig_27879	276	0.03013	1144	1
dDocent_Contig_32118	229	0.03022	1124	1
dDocent_Contig_32118	271	0.03022	1124	1
dDocent_Contig_17643	16	0.03024	1140	1
dDocent_Contig_45091	195	0.03028	1122	1
dDocent_Contig_45091	284	0.03028	1122	1
dDocent_Contig_7823	50	0.03029	1138	1
dDocent_Contig_52063	171	0.03029	1138	1
dDocent_Contig_42429	22	0.03055	1112	1
dDocent_Contig_23743	232	0.03056	1128	1
dDocent_Contig_4769	33	0.03077	1104	1
dDocent_Contig_4769	96	0.03077	1104	1
dDocent_Contig_4769	101	0.03077	1104	1
dDocent_Contig_4769	162	0.03077	1104	1
dDocent_Contig_41873	246	0.03078	1120	1
dDocent_Contig_9594	162	0.03083	1102	1
dDocent_Contig_9594	180	0.03083	1102	1
dDocent_Contig_9594	284	0.03083	1102	1
dDocent_Contig_31231	12	0.03088	1100	1
dDocent_Contig_31231	82	0.03088	1100	1
dDocent_Contig_31231	95	0.03088	1100	1
dDocent_Contig_31231	123	0.03088	1100	1
dDocent_Contig_15609	49	0.03094	1098	1
dDocent_Contig_20174	48	0.03105	1110	1
dDocent_Contig_31330	53	0.03105	1094	1
dDocent_Contig_24745	88	0.03105	1110	1
dDocent_Contig_20174	217	0.03105	1110	1
dDocent_Contig_31330	234	0.03105	1094	1
dDocent_Contig_54578	19	0.03116	1090	1
dDocent_Contig_13589	225	0.03116	1090	1
dDocent_Contig_42534	64	0.03117	1106	1
dDocent_Contig_42534	227	0.03117	1106	1
dDocent_Contig_30474	288	0.03145	1080	1
dDocent_Contig_7299	9	0.03151	1078	1
dDocent_Contig_7299	110	0.03151	1078	1
dDocent_Contig_7299	198	0.03151	1078	1
dDocent_Contig_43576	160	0.03156	1092	1
dDocent_Contig_3782	140	0.03157	1076	1
dDocent_Contig_28938	87	0.03163	1074	1
dDocent_Contig_47621	33	0.03169	1072	1
dDocent_Contig_10989	187	0.03186	1082	1
dDocent_Contig_10989	252	0.03186	1082	1
dDocent_Contig_21529	98	0.03187	1066	1
dDocent_Contig_736	50	0.03192	1064	1
dDocent_Contig_31647	105	0.03192	1064	1
dDocent_Contig_31122	47	0.03197	1078	1
dDocent_Contig_1600	199	0.03198	1062	1
dDocent_Contig_11020	201	0.03203	1076	1
dDocent_Contig_5081	202	0.03217	1056	1
dDocent_Contig_24435	235	0.03217	1056	1
dDocent_Contig_49077	282	0.03217	1056	1
dDocent_Contig_44936	133	0.03223	1054	1
dDocent_Contig_44292	222	0.03241	1048	1
dDocent_Contig_27158	193	0.03246	1062	1
dDocent_Contig_27158	219	0.03246	1062	1
dDocent_Contig_499	72	0.03247	1046	1
dDocent_Contig_369	265	0.03247	1046	1
dDocent_Contig_20675	100	0.03252	1060	1
dDocent_Contig_44989	247	0.0326	1042	1
dDocent_Contig_30092	133	0.03264	1056	1
dDocent_Contig_21204	238	0.03264	1056	1
dDocent_Contig_44936	7	0.0327	1054	1
dDocent_Contig_17661	209	0.03272	1038	1
dDocent_Contig_5793	260	0.03276	1052	1
dDocent_Contig_20287	244	0.03279	1036	1
dDocent_Contig_55903	215	0.03283	1050	1
dDocent_Contig_35427	70	0.03285	1034	1
dDocent_Contig_41772	162	0.03295	1046	1
dDocent_Contig_20691	137	0.03311	1026	1
dDocent_Contig_26364	24	0.03321	1038	1
dDocent_Contig_54486	60	0.03324	1022	1
dDocent_Contig_509	203	0.03327	1036	1
dDocent_Contig_23218	280	0.03343	1016	1
dDocent_Contig_1788	8	0.03353	1028	1
dDocent_Contig_6626	49	0.03353	1028	1
dDocent_Contig_28043	139	0.03363	1010	1
dDocent_Contig_7184	28	0.03386	1018	1
dDocent_Contig_19459	201	0.03386	1018	1
dDocent_Contig_16583	226	0.03386	1018	1
dDocent_Contig_2119	230	0.03386	1018	1
dDocent_Contig_37665	257	0.03386	1018	1
dDocent_Contig_35194	91	0.03392	1016	1
dDocent_Contig_28881	10	0.03426	1006	1
dDocent_Contig_19456	249	0.03441	987	1
dDocent_Contig_748	154	0.03448	985	1
dDocent_Contig_36469	239	0.03448	985	1
dDocent_Contig_22522	162	0.03455	983	1
dDocent_Contig_44936	81	0.03457	968	1
dDocent_Contig_44936	229	0.03457	968	1
dDocent_Contig_2726	45	0.03462	981	1
dDocent_Contig_57446	114	0.03471	993	1
dDocent_Contig_9191	44	0.03484	975	1
dDocent_Contig_25626	111	0.03484	975	1
dDocent_Contig_12766	174	0.03484	975	1
dDocent_Contig_33966	206	0.03498	971	1
dDocent_Contig_12727	76	0.03508	954	1
dDocent_Contig_16218	232	0.03513	981	1
dDocent_Contig_4421	156	0.03527	963	1
dDocent_Contig_13192	199	0.03571	937	1
dDocent_Contig_13192	206	0.03571	937	1
dDocent_Contig_13192	218	0.03571	937	1
dDocent_Contig_13192	223	0.03571	937	1
dDocent_Contig_13192	269	0.03571	937	1
dDocent_Contig_13192	283	0.03571	937	1
dDocent_Contig_17521	69	0.03575	936	1
dDocent_Contig_17521	239	0.03575	936	1
dDocent_Contig_4629	259	0.03586	947	1
dDocent_Contig_2446	130	0.03594	931	1
dDocent_Contig_35808	78	0.03606	928	1
dDocent_Contig_439	81	0.03606	928	1
dDocent_Contig_18349	117	0.03606	928	1
dDocent_Contig_19413	130	0.03606	928	1
dDocent_Contig_48425	264	0.03606	928	1
dDocent_Contig_15849	269	0.03606	928	1
dDocent_Contig_23398	60	0.03614	926	1
dDocent_Contig_23398	174	0.03614	926	1
dDocent_Contig_5202	30	0.03625	937	1
dDocent_Contig_4522	165	0.03625	937	1
dDocent_Contig_4522	174	0.03625	937	1
dDocent_Contig_31948	228	0.03632	935	1
dDocent_Contig_9225	11	0.03641	919	1
dDocent_Contig_7135	96	0.03641	919	1
dDocent_Contig_3322	156	0.03644	932	1
dDocent_Contig_16076	125	0.03649	917	1
dDocent_Contig_10669	12	0.03652	930	1
dDocent_Contig_22925	108	0.03652	930	1
dDocent_Contig_4102	259	0.03653	916	1
dDocent_Contig_44821	75	0.03665	913	1
dDocent_Contig_7646	122	0.03665	913	1
dDocent_Contig_25836	107	0.03668	926	1
dDocent_Contig_25836	125	0.03668	926	1
dDocent_Contig_15353	173	0.03668	926	1
dDocent_Contig_7495	257	0.03668	926	1
dDocent_Contig_5358	172	0.03693	906	1
dDocent_Contig_30474	245	0.03702	904	1
dDocent_Contig_30474	250	0.03702	904	1
dDocent_Contig_8845	61	0.03708	916	1
dDocent_Contig_44092	124	0.03708	916	1
dDocent_Contig_1003	35	0.0371	902	1
dDocent_Contig_14647	76	0.0371	902	1
dDocent_Contig_3169	155	0.0371	902	1
dDocent_Contig_29197	86	0.03716	914	1
dDocent_Contig_26175	27	0.03726	898	1
dDocent_Contig_40946	175	0.03732	910	1
dDocent_Contig_40946	185	0.03732	910	1
dDocent_Contig_15526	100	0.03747	893	1
dDocent_Contig_15526	213	0.03747	893	1
dDocent_Contig_44543	33	0.03756	891	1
dDocent_Contig_19296	197	0.03761	903	1
dDocent_Contig_30212	161	0.03773	887	1
dDocent_Contig_18124	264	0.03777	886	1
dDocent_Contig_4396	163	0.0379	896	1
dDocent_Contig_46395	62	0.03799	894	1
dDocent_Contig_46395	127	0.03799	894	1
dDocent_Contig_58110	126	0.03807	892	1
dDocent_Contig_23578	160	0.03807	879	1
dDocent_Contig_23578	185	0.03807	879	1
dDocent_Contig_23578	193	0.03807	879	1
dDocent_Contig_12856	200	0.03811	878	1
dDocent_Contig_9076	199	0.03824	875	1
dDocent_Contig_37232	60	0.03829	874	1
dDocent_Contig_5618	110	0.03829	874	1
dDocent_Contig_32616	135	0.03829	874	1
dDocent_Contig_16059	203	0.03829	874	1
dDocent_Contig_54977	273	0.03829	887	1
dDocent_Contig_52141	32	0.03842	884	1
dDocent_Contig_1501	87	0.03846	883	1
dDocent_Contig_16463	12	0.03859	867	1
dDocent_Contig_32653	153	0.03859	867	1
dDocent_Contig_7130	121	0.03868	865	1
dDocent_Contig_30141	219	0.03868	865	1
dDocent_Contig_2478	267	0.03872	877	1
dDocent_Contig_12364	270	0.0389	873	1
dDocent_Contig_5878	43	0.03891	860	1
dDocent_Contig_5878	51	0.03891	860	1
dDocent_Contig_5878	118	0.03891	860	1
dDocent_Contig_5878	137	0.03891	860	1
dDocent_Contig_53866	39	0.03895	872	1
dDocent_Contig_15156	136	0.03895	872	1
dDocent_Contig_17238	159	0.03895	859	1
dDocent_Contig_5202	105	0.03904	870	1
dDocent_Contig_9194	61	0.03909	856	1
dDocent_Contig_4674	231	0.03926	865	1
dDocent_Contig_1005	252	0.03927	852	1
dDocent_Contig_52810	96	0.03932	851	1
dDocent_Contig_52741	212	0.03932	851	1
dDocent_Contig_18111	47	0.03937	850	1
dDocent_Contig_16027	193	0.03941	849	1
dDocent_Contig_33569	29	0.03944	861	1
dDocent_Contig_23330	74	0.03946	848	1
dDocent_Contig_16275	208	0.03949	860	1
dDocent_Contig_31477	141	0.03953	859	1
dDocent_Contig_2995	124	0.03955	846	1
dDocent_Contig_2017	213	0.03955	846	1
dDocent_Contig_2995	250	0.03955	846	1
dDocent_Contig_2017	253	0.03955	846	1
dDocent_Contig_2995	255	0.03955	846	1
dDocent_Contig_25947	271	0.03955	846	1
dDocent_Contig_7930	159	0.03958	858	1
dDocent_Contig_50088	271	0.03958	858	1
dDocent_Contig_25196	191	0.0396	845	1
dDocent_Contig_1788	182	0.03964	844	1
dDocent_Contig_332	62	0.03972	855	1
dDocent_Contig_1512	161	0.03972	855	1
dDocent_Contig_8361	230	0.03972	855	1
dDocent_Contig_29465	46	0.03981	853	1
dDocent_Contig_1109	311	0.03981	853	1
dDocent_Contig_19848	196	0.03983	840	1
dDocent_Contig_19848	204	0.03983	840	1
dDocent_Contig_19848	269	0.03983	840	1
dDocent_Contig_49298	175	0.03988	839	1
dDocent_Contig_49298	280	0.03988	839	1
dDocent_Contig_5515	29	0.04002	836	1
dDocent_Contig_20009	62	0.04019	845	1
dDocent_Contig_26291	57	0.04026	831	1
dDocent_Contig_451	204	0.04036	829	1
dDocent_Contig_5745	228	0.04036	829	1
dDocent_Contig_1049	26	0.04038	841	1
dDocent_Contig_43089	40	0.04038	841	1
dDocent_Contig_1049	50	0.04038	841	1
dDocent_Contig_43089	111	0.04038	841	1
dDocent_Contig_1049	209	0.04038	841	1
dDocent_Contig_6869	14	0.04041	828	1
dDocent_Contig_38743	172	0.04056	825	1
dDocent_Contig_38743	239	0.04056	825	1
dDocent_Contig_12014	17	0.04061	824	1
dDocent_Contig_12014	24	0.04061	824	1
dDocent_Contig_28311	169	0.04061	824	1
dDocent_Contig_28311	174	0.04061	824	1
dDocent_Contig_28311	183	0.04061	824	1
dDocent_Contig_11858	116	0.04067	835	1
dDocent_Contig_11858	123	0.04067	835	1
dDocent_Contig_11349	228	0.0407	822	1
dDocent_Contig_17029	64	0.04072	834	1
dDocent_Contig_17029	133	0.04072	834	1
dDocent_Contig_17029	266	0.04072	834	1
dDocent_Contig_32653	179	0.04075	821	1
dDocent_Contig_7957	163	0.04077	833	1
dDocent_Contig_31256	60	0.04082	832	1
dDocent_Contig_9058	20	0.04087	831	1
dDocent_Contig_30738	141	0.04087	831	1
dDocent_Contig_25016	185	0.0409	818	1
dDocent_Contig_39318	68	0.041	816	1
dDocent_Contig_40556	267	0.041	816	1
dDocent_Contig_56914	235	0.04111	826	1
dDocent_Contig_20949	115	0.04126	811	1
dDocent_Contig_12901	40	0.04131	810	1
dDocent_Contig_43824	266	0.04141	808	1
dDocent_Contig_27054	163	0.04156	805	1
dDocent_Contig_27054	210	0.04156	805	1
dDocent_Contig_27054	252	0.04156	805	1
dDocent_Contig_31231	183	0.04167	803	1
dDocent_Contig_31231	198	0.04167	803	1
dDocent_Contig_12603	87	0.04182	800	1
dDocent_Contig_3673	240	0.04193	798	1
dDocent_Contig_3764	268	0.04209	795	1
dDocent_Contig_11796	41	0.04214	794	1
dDocent_Contig_7588	283	0.04218	805	1
dDocent_Contig_41781	11	0.04224	804	1
dDocent_Contig_41781	18	0.04224	804	1
dDocent_Contig_8167	134	0.04241	789	1
dDocent_Contig_12146	85	0.04271	795	1
dDocent_Contig_12146	118	0.04271	795	1
dDocent_Contig_13774	189	0.04271	795	1
dDocent_Contig_12146	204	0.04271	795	1
dDocent_Contig_24631	17	0.04273	783	1
dDocent_Contig_22917	164	0.04277	794	1
dDocent_Contig_48272	233	0.04277	794	1
dDocent_Contig_846	66	0.04298	790	1
dDocent_Contig_2615	133	0.04298	790	1
dDocent_Contig_29851	256	0.04298	790	1
dDocent_Contig_14401	108	0.04304	789	1
dDocent_Contig_15256	54	0.04309	788	1
dDocent_Contig_23591	7	0.04311	776	1
dDocent_Contig_18798	47	0.04317	775	1
dDocent_Contig_18798	75	0.04317	775	1
dDocent_Contig_37989	192	0.04317	775	1
dDocent_Contig_7430	268	0.04317	775	1
dDocent_Contig_37989	276	0.04317	775	1
dDocent_Contig_17112	156	0.0432	786	1
dDocent_Contig_46276	237	0.04323	774	1
dDocent_Contig_46276	273	0.04323	774	1
dDocent_Contig_25628	279	0.04328	773	1
dDocent_Contig_25714	271	0.04345	770	1
dDocent_Contig_34651	28	0.04373	765	1
dDocent_Contig_34651	123	0.04373	765	1
dDocent_Contig_5934	165	0.04381	775	1
dDocent_Contig_5121	170	0.04391	762	1
dDocent_Contig_11805	154	0.04398	772	1
dDocent_Contig_9443	169	0.04398	772	1
dDocent_Contig_10330	69	0.04404	771	1
dDocent_Contig_10330	93	0.04404	771	1
dDocent_Contig_10330	136	0.04404	771	1
dDocent_Contig_37267	230	0.04404	771	1
dDocent_Contig_42406	110	0.0442	757	1
dDocent_Contig_18562	116	0.0442	757	1
dDocent_Contig_29109	90	0.04443	753	1
dDocent_Contig_42561	81	0.04444	764	1
dDocent_Contig_17313	181	0.04449	752	1
dDocent_Contig_24347	21	0.04456	762	1
dDocent_Contig_24347	276	0.04456	762	1
dDocent_Contig_11085	48	0.04479	747	1
dDocent_Contig_11085	128	0.04479	747	1
dDocent_Contig_33808	134	0.04479	747	1
dDocent_Contig_11085	160	0.04479	747	1
dDocent_Contig_21215	52	0.0448	758	1
dDocent_Contig_27240	69	0.04485	746	1
dDocent_Contig_16096	240	0.04497	744	1
dDocent_Contig_23247	56	0.04509	742	1
dDocent_Contig_20638	169	0.04509	753	1
dDocent_Contig_5081	197	0.04509	742	1
dDocent_Contig_20638	217	0.04509	753	1
dDocent_Contig_20638	225	0.04509	753	1
dDocent_Contig_17023	281	0.04515	752	1
dDocent_Contig_36657	44	0.04533	738	1
dDocent_Contig_36657	113	0.04533	738	1
dDocent_Contig_51814	216	0.04533	738	1
dDocent_Contig_20528	261	0.04545	736	1
dDocent_Contig_15321	265	0.04545	736	1
dDocent_Contig_33925	102	0.04552	735	1
dDocent_Contig_46682	157	0.04552	735	1
dDocent_Contig_28320	276	0.0457	732	1
dDocent_Contig_29316	182	0.04582	741	1
dDocent_Contig_15811	181	0.04583	730	1
dDocent_Contig_6490	85	0.04595	728	1
dDocent_Contig_3169	137	0.04595	728	1
dDocent_Contig_13642	264	0.04595	728	1
dDocent_Contig_33279	280	0.04595	728	1
dDocent_Contig_32161	37	0.04608	726	1
dDocent_Contig_32161	44	0.04608	726	1
dDocent_Contig_32161	49	0.04608	726	1
dDocent_Contig_27500	56	0.04613	736	1
dDocent_Contig_31371	66	0.04626	734	1
dDocent_Contig_31371	76	0.04626	734	1
dDocent_Contig_31371	238	0.04626	734	1
dDocent_Contig_5822	248	0.04645	731	1
dDocent_Contig_37380	18	0.04646	720	1
dDocent_Contig_37380	162	0.04646	720	1
dDocent_Contig_37380	188	0.04646	720	1
dDocent_Contig_37380	280	0.04646	720	1
dDocent_Contig_43322	98	0.0467	727	1
dDocent_Contig_12242	190	0.0467	727	1
dDocent_Contig_5553	160	0.04683	725	1
dDocent_Contig_20447	65	0.0469	724	1
dDocent_Contig_12466	198	0.0469	724	1
dDocent_Contig_10330	195	0.04722	719	1
dDocent_Contig_10330	206	0.04722	719	1
dDocent_Contig_10330	277	0.04722	719	1
dDocent_Contig_37967	158	0.04735	717	1
dDocent_Contig_37967	164	0.04735	717	1
dDocent_Contig_37967	199	0.04735	717	1
dDocent_Contig_37967	226	0.04735	717	1
dDocent_Contig_40269	48	0.04742	716	1
dDocent_Contig_59253	76	0.04752	704	1
dDocent_Contig_59253	133	0.04752	704	1
dDocent_Contig_50361	226	0.04752	704	1
dDocent_Contig_12606	28	0.04762	713	1
dDocent_Contig_43228	53	0.04762	713	1
dDocent_Contig_12606	136	0.04762	713	1
dDocent_Contig_12606	176	0.04762	713	1
dDocent_Contig_10947	156	0.04779	700	1
dDocent_Contig_37063	266	0.04793	698	1
dDocent_Contig_45228	178	0.04799	697	1
dDocent_Contig_13609	62	0.04813	695	1
dDocent_Contig_13609	118	0.04813	695	1
dDocent_Contig_8543	127	0.04813	695	1
dDocent_Contig_13609	133	0.04813	695	1
dDocent_Contig_44945	162	0.04813	695	1
dDocent_Contig_13609	227	0.04813	695	1
dDocent_Contig_44945	237	0.04813	695	1
dDocent_Contig_17276	39	0.0483	703	1
dDocent_Contig_17276	73	0.0483	703	1
dDocent_Contig_17276	112	0.0483	703	1
dDocent_Contig_17276	176	0.0483	703	1
dDocent_Contig_17545	12	0.04841	691	1
dDocent_Contig_17545	109	0.04841	691	1
dDocent_Contig_20621	186	0.04862	688	1
dDocent_Contig_10066	140	0.04871	697	1
dDocent_Contig_22488	198	0.04898	683	1
dDocent_Contig_27500	52	0.0492	690	1
dDocent_Contig_4036	212	0.04926	679	1
dDocent_Contig_45164	224	0.04933	668	1
dDocent_Contig_44147	68	0.0494	667	1
dDocent_Contig_9988	241	0.04941	677	1
dDocent_Contig_280	56	0.04948	676	1
dDocent_Contig_13807	104	0.04985	681	1
dDocent_Contig_24133	189	0.04985	671	1
dDocent_Contig_38660	191	0.04985	661	1
dDocent_Contig_24133	235	0.04985	671	1
dDocent_Contig_43652	43	0.05	659	1
dDocent_Contig_11068	91	0.05007	668	1
dDocent_Contig_44936	33	0.05023	656	1
dDocent_Contig_3224	86	0.05023	656	1
dDocent_Contig_15050	87	0.05023	656	1
dDocent_Contig_5013	217	0.05023	656	1
dDocent_Contig_5023	226	0.05023	656	1
dDocent_Contig_46965	11	0.0503	655	1
dDocent_Contig_11187	246	0.0503	665	1
dDocent_Contig_21967	258	0.0503	665	1
dDocent_Contig_3344	71	0.05045	663	1
dDocent_Contig_47506	233	0.05046	653	1
dDocent_Contig_23100	122	0.05053	662	1
dDocent_Contig_15740	9	0.05054	652	1
dDocent_Contig_31184	99	0.0506	661	1
dDocent_Contig_41749	104	0.0506	661	1
dDocent_Contig_1961	284	0.05061	651	1
dDocent_Contig_25035	105	0.05068	660	1
dDocent_Contig_6082	156	0.05068	660	1
dDocent_Contig_6082	193	0.05068	660	1
dDocent_Contig_6082	251	0.05068	660	1
dDocent_Contig_3414	112	0.05099	656	1
dDocent_Contig_10284	78	0.051	646	1
dDocent_Contig_10284	253	0.051	646	1
dDocent_Contig_10284	271	0.051	646	1
dDocent_Contig_15295	59	0.05115	654	1
dDocent_Contig_5822	261	0.05122	653	1
dDocent_Contig_26175	9	0.05124	643	1
dDocent_Contig_26175	78	0.05124	643	1
dDocent_Contig_36815	115	0.05124	643	1
dDocent_Contig_33098	202	0.05124	643	1
dDocent_Contig_26175	230	0.05124	643	1
dDocent_Contig_8680	44	0.05138	651	1
dDocent_Contig_52896	85	0.05138	651	1
dDocent_Contig_8680	101	0.05138	651	1
dDocent_Contig_30103	118	0.05138	651	1
dDocent_Contig_52896	123	0.05138	651	1
dDocent_Contig_52896	167	0.05138	651	1
dDocent_Contig_8680	204	0.05138	651	1
dDocent_Contig_52896	209	0.05138	651	1
dDocent_Contig_27878	271	0.0514	641	1
dDocent_Contig_53404	186	0.05148	640	1
dDocent_Contig_34	286	0.05148	640	1
dDocent_Contig_22375	110	0.05154	649	1
dDocent_Contig_22375	259	0.05154	649	1
dDocent_Contig_4432	278	0.05164	638	1
dDocent_Contig_15353	104	0.05172	637	1
dDocent_Contig_12685	104	0.05186	645	1
dDocent_Contig_37611	250	0.05186	645	1
dDocent_Contig_12685	275	0.05186	645	1
dDocent_Contig_3291	127	0.05189	635	1
dDocent_Contig_50298	18	0.05194	644	1
dDocent_Contig_50298	54	0.05194	644	1
dDocent_Contig_50298	191	0.05194	644	1
dDocent_Contig_30298	181	0.0521	642	1
dDocent_Contig_7230	113	0.05213	632	1
dDocent_Contig_51829	74	0.05218	641	1
dDocent_Contig_28836	228	0.05218	641	1
dDocent_Contig_18415	190	0.0523	630	1
dDocent_Contig_1764	246	0.05238	629	1
dDocent_Contig_6407	35	0.05251	637	1
dDocent_Contig_4426	109	0.05263	626	1
dDocent_Contig_52733	113	0.05263	626	1
dDocent_Contig_52733	155	0.05263	626	1
dDocent_Contig_22384	38	0.05276	634	1
dDocent_Contig_5081	268	0.0528	624	1
dDocent_Contig_30906	267	0.05292	632	1
dDocent_Contig_12950	91	0.05297	622	1
dDocent_Contig_38144	98	0.05297	622	1
dDocent_Contig_12950	177	0.05297	622	1
dDocent_Contig_38144	275	0.05297	622	1
dDocent_Contig_9439	156	0.05323	619	1
dDocent_Contig_9439	280	0.05323	619	1
dDocent_Contig_28751	24	0.05326	628	1
dDocent_Contig_34385	28	0.05326	628	1
dDocent_Contig_28751	117	0.05326	628	1
dDocent_Contig_22200	156	0.05326	628	1
dDocent_Contig_28751	180	0.05326	628	1
dDocent_Contig_22200	238	0.05326	628	1
dDocent_Contig_46062	245	0.05326	628	1
dDocent_Contig_951	116	0.05331	618	1
dDocent_Contig_951	205	0.05331	618	1
dDocent_Contig_44169	186	0.0534	617	1
dDocent_Contig_42984	17	0.05343	626	1
dDocent_Contig_509	101	0.05348	616	1
dDocent_Contig_16781	8	0.05366	614	1
dDocent_Contig_16781	61	0.05366	614	1
dDocent_Contig_17631	61	0.05366	614	1
dDocent_Contig_6065	196	0.05366	614	1
dDocent_Contig_20539	105	0.05377	622	1
dDocent_Contig_14025	280	0.05386	621	1
dDocent_Contig_33485	280	0.05386	621	1
dDocent_Contig_47719	288	0.05386	621	1
dDocent_Contig_41290	253	0.05392	611	1
dDocent_Contig_11209	84	0.05395	620	1
dDocent_Contig_40970	260	0.05401	610	1
dDocent_Contig_17164	259	0.0541	609	1
dDocent_Contig_43543	66	0.05419	608	1
dDocent_Contig_43543	98	0.05419	608	1
dDocent_Contig_59253	116	0.05419	608	1
dDocent_Contig_5313	264	0.05419	608	1
dDocent_Contig_6088	193	0.05438	615	1
dDocent_Contig_33260	193	0.05446	605	1
dDocent_Contig_51087	27	0.05455	604	1
dDocent_Contig_31098	51	0.05455	604	1
dDocent_Contig_51087	190	0.05455	604	1
dDocent_Contig_51087	217	0.05455	604	1
dDocent_Contig_51087	225	0.05455	604	1
dDocent_Contig_51087	284	0.05455	604	1
dDocent_Contig_41260	162	0.05473	602	1
dDocent_Contig_39944	171	0.05473	602	1
dDocent_Contig_28570	263	0.05474	611	1
dDocent_Contig_7178	84	0.05482	601	1
dDocent_Contig_52533	218	0.05482	601	1
dDocent_Contig_36460	135	0.05492	609	1
dDocent_Contig_33878	41	0.05509	598	1
dDocent_Contig_36927	27	0.05518	597	1
dDocent_Contig_23018	78	0.05519	606	1
dDocent_Contig_11556	38	0.05537	595	1
dDocent_Contig_31866	40	0.05537	604	1
dDocent_Contig_11556	91	0.05537	595	1
dDocent_Contig_11085	114	0.05537	595	1
dDocent_Contig_18221	183	0.05537	604	1
dDocent_Contig_4739	60	0.05556	602	1
dDocent_Contig_9801	115	0.05556	593	1
dDocent_Contig_1822	98	0.05583	599	1
dDocent_Contig_21739	127	0.05583	599	1
dDocent_Contig_1822	229	0.05583	599	1
dDocent_Contig_42650	36	0.05584	590	1
dDocent_Contig_42650	100	0.05584	590	1
dDocent_Contig_19114	177	0.05584	590	1
dDocent_Contig_3224	247	0.05593	589	1
dDocent_Contig_269	16	0.05603	588	1
dDocent_Contig_24704	47	0.05603	588	1
dDocent_Contig_24704	92	0.05603	588	1
dDocent_Contig_24704	103	0.05603	588	1
dDocent_Contig_269	237	0.05603	588	1
dDocent_Contig_17704	181	0.05612	587	1
dDocent_Contig_11771	104	0.05631	585	1
dDocent_Contig_15979	275	0.05631	585	1
dDocent_Contig_52974	57	0.0564	593	1
dDocent_Contig_55903	232	0.05649	592	1
dDocent_Contig_45251	155	0.05668	590	1
dDocent_Contig_7178	201	0.0568	580	1
dDocent_Contig_2790	122	0.0569	579	1
dDocent_Contig_8311	50	0.05699	578	1
dDocent_Contig_8311	94	0.05699	578	1
dDocent_Contig_20518	156	0.05707	586	1
dDocent_Contig_18125	193	0.05707	586	1
dDocent_Contig_29564	196	0.05709	577	1
dDocent_Contig_56842	206	0.05719	576	1
dDocent_Contig_14344	117	0.05729	575	1
dDocent_Contig_2883	207	0.05776	579	1
dDocent_Contig_2883	244	0.05776	579	1
dDocent_Contig_17559	174	0.058	568	1
dDocent_Contig_49087	109	0.05806	576	1
dDocent_Contig_4773	184	0.05806	576	1
dDocent_Contig_30083	79	0.0582	566	1
dDocent_Contig_30906	182	0.0582	566	1
dDocent_Contig_30906	282	0.0582	566	1
dDocent_Contig_33862	18	0.0583	565	1
dDocent_Contig_6848	179	0.0583	565	1
dDocent_Contig_6848	203	0.0583	565	1
dDocent_Contig_6848	242	0.0583	565	1
dDocent_Contig_6848	254	0.0583	565	1
dDocent_Contig_6848	286	0.0583	565	1
dDocent_Contig_4625	58	0.05841	564	1
dDocent_Contig_25504	182	0.05841	564	1
dDocent_Contig_4625	217	0.05841	564	1
dDocent_Contig_4625	233	0.05841	564	1
dDocent_Contig_14853	263	0.05851	563	1
dDocent_Contig_19434	222	0.05872	561	1
dDocent_Contig_19434	265	0.05872	561	1
dDocent_Contig_26547	104	0.05877	569	1
dDocent_Contig_26547	139	0.05877	569	1
dDocent_Contig_21204	39	0.05882	560	1
dDocent_Contig_21204	83	0.05882	560	1
dDocent_Contig_21204	115	0.05882	560	1
dDocent_Contig_21204	192	0.05882	560	1
dDocent_Contig_837	298	0.05882	560	1
dDocent_Contig_20237	335	0.05882	560	1
dDocent_Contig_53776	42	0.05893	559	1
dDocent_Contig_34437	65	0.05893	559	1
dDocent_Contig_6766	13	0.05908	566	1
dDocent_Contig_6766	34	0.05908	566	1
dDocent_Contig_13541	65	0.05919	565	1
dDocent_Contig_5245	124	0.05919	565	1
dDocent_Contig_3583	77	0.05925	556	1
dDocent_Contig_16781	156	0.05925	556	1
dDocent_Contig_15005	265	0.05925	556	1
dDocent_Contig_31560	20	0.05929	564	1
dDocent_Contig_32465	25	0.05935	555	1
dDocent_Contig_32465	30	0.05935	555	1
dDocent_Contig_32465	55	0.05935	555	1
dDocent_Contig_32465	82	0.05935	555	1
dDocent_Contig_23170	184	0.05957	553	1
dDocent_Contig_23170	258	0.05957	553	1
dDocent_Contig_506	79	0.05961	561	1
dDocent_Contig_7408	87	0.05967	552	1
dDocent_Contig_58472	165	0.05971	560	1
dDocent_Contig_58472	197	0.05971	560	1
dDocent_Contig_14068	232	0.05971	560	1
dDocent_Contig_58472	265	0.05971	560	1
dDocent_Contig_25086	10	0.05982	559	1
dDocent_Contig_25086	32	0.05982	559	1
dDocent_Contig_25086	256	0.05982	559	1
dDocent_Contig_25086	275	0.05982	559	1
dDocent_Contig_39485	58	0.06	549	1
dDocent_Contig_4378	115	0.06011	548	1
dDocent_Contig_4378	198	0.06011	548	1
dDocent_Contig_11020	34	0.06033	546	1
dDocent_Contig_3419	45	0.06044	545	1
dDocent_Contig_108	64	0.06044	545	1
dDocent_Contig_108	72	0.06044	545	1
dDocent_Contig_13324	74	0.06044	545	1
dDocent_Contig_49720	223	0.06047	553	1
dDocent_Contig_22291	14	0.06089	541	1
dDocent_Contig_22291	36	0.06089	541	1
dDocent_Contig_22291	280	0.06089	541	1
dDocent_Contig_20624	97	0.06102	548	1
dDocent_Contig_43603	20	0.06111	539	1
dDocent_Contig_43590	130	0.06111	539	1
dDocent_Contig_43603	169	0.06111	539	1
dDocent_Contig_7064	206	0.06113	547	1
dDocent_Contig_1507	33	0.06136	545	1
dDocent_Contig_9076	186	0.06145	536	1
dDocent_Contig_14007	278	0.06145	536	1
dDocent_Contig_25694	47	0.06158	543	1
dDocent_Contig_25694	197	0.06158	543	1
dDocent_Contig_31753	115	0.0618	533	1
dDocent_Contig_6335	161	0.06181	541	1
dDocent_Contig_6335	171	0.06181	541	1
dDocent_Contig_15328	204	0.06192	540	1
dDocent_Contig_24066	91	0.06203	531	1
dDocent_Contig_42727	118	0.06215	538	1
dDocent_Contig_39494	198	0.06226	529	1
dDocent_Contig_24483	180	0.06238	528	1
dDocent_Contig_25953	12	0.0625	527	1
dDocent_Contig_31594	12	0.0625	527	1
dDocent_Contig_31594	119	0.0625	527	1
dDocent_Contig_28733	86	0.06262	526	1
dDocent_Contig_15337	163	0.06262	526	1
dDocent_Contig_15337	227	0.06262	526	1
dDocent_Contig_16226	113	0.06274	525	1
dDocent_Contig_16226	243	0.06274	525	1
dDocent_Contig_1776	261	0.06286	524	1
dDocent_Contig_19986	17	0.06297	531	1
dDocent_Contig_18213	153	0.06297	531	1
dDocent_Contig_17894	52	0.06298	523	1
dDocent_Contig_17894	58	0.06298	523	1
dDocent_Contig_44346	211	0.06322	521	1
dDocent_Contig_5461	95	0.06334	520	1
dDocent_Contig_3642	178	0.06345	527	1
dDocent_Contig_7083	263	0.06345	527	1
dDocent_Contig_12858	276	0.06346	519	1
dDocent_Contig_20337	118	0.06357	526	1
dDocent_Contig_27031	250	0.06357	526	1
dDocent_Contig_25262	88	0.06358	518	1
dDocent_Contig_20085	20	0.06371	517	1
dDocent_Contig_26480	226	0.06371	517	1
dDocent_Contig_26321	162	0.06395	515	1
dDocent_Contig_26321	178	0.06395	515	1
dDocent_Contig_6209	14	0.0643	520	1
dDocent_Contig_12605	30	0.06436	504	1
dDocent_Contig_27124	119	0.06436	504	1
dDocent_Contig_33485	135	0.06436	504	1
dDocent_Contig_5953	205	0.06436	504	1
dDocent_Contig_48868	74	0.06442	519	1
dDocent_Contig_23327	136	0.06442	519	1
dDocent_Contig_49221	264	0.06442	519	1
dDocent_Contig_18415	82	0.06445	511	1
dDocent_Contig_13907	41	0.06448	503	1
dDocent_Contig_7198	74	0.06448	503	1
dDocent_Contig_7387	64	0.06461	502	1
dDocent_Contig_7387	90	0.06461	502	1
dDocent_Contig_49948	199	0.06461	502	1
dDocent_Contig_19643	215	0.06461	502	1
dDocent_Contig_46812	61	0.06471	509	1
dDocent_Contig_46812	211	0.06471	509	1
dDocent_Contig_22404	42	0.0648	516	1
dDocent_Contig_53607	84	0.0648	516	1
dDocent_Contig_53607	94	0.0648	516	1
dDocent_Contig_53607	163	0.0648	516	1
dDocent_Contig_55231	8	0.06483	508	1
dDocent_Contig_22413	14	0.06483	508	1
dDocent_Contig_25170	48	0.06483	508	1
dDocent_Contig_25170	81	0.06483	508	1
dDocent_Contig_19344	273	0.06487	500	1
dDocent_Contig_30745	120	0.06492	515	1
dDocent_Contig_2332	179	0.06492	515	1
dDocent_Contig_5029	177	0.065	499	1
dDocent_Contig_47359	35	0.06513	498	1
dDocent_Contig_47359	65	0.06513	498	1
dDocent_Contig_21155	113	0.06513	498	1
dDocent_Contig_28667	83	0.06522	505	1
dDocent_Contig_31163	73	0.06526	497	1
dDocent_Contig_31163	255	0.06526	497	1
dDocent_Contig_2821	274	0.06535	504	1
dDocent_Contig_2332	91	0.06548	503	1
dDocent_Contig_1711	222	0.06548	503	1
dDocent_Contig_54578	175	0.06552	495	1
dDocent_Contig_54578	203	0.06552	495	1
dDocent_Contig_54578	209	0.06552	495	1
dDocent_Contig_54578	281	0.06552	495	1
dDocent_Contig_837	290	0.06552	495	1
dDocent_Contig_4656	90	0.06566	494	1
dDocent_Contig_41210	152	0.06566	494	1
dDocent_Contig_4575	212	0.06566	494	1
dDocent_Contig_31837	233	0.06566	494	1
dDocent_Contig_9833	112	0.06569	509	1
dDocent_Contig_18135	224	0.06574	501	1
dDocent_Contig_45183	40	0.06579	493	1
dDocent_Contig_9934	111	0.06579	493	1
dDocent_Contig_4746	131	0.066	499	1
dDocent_Contig_18279	36	0.06613	498	1
dDocent_Contig_5202	55	0.06613	498	1
dDocent_Contig_29529	201	0.06613	498	1
dDocent_Contig_19785	286	0.06619	490	1
dDocent_Contig_47776	92	0.06627	497	1
dDocent_Contig_48163	141	0.06646	488	1
dDocent_Contig_35044	226	0.06646	488	1
dDocent_Contig_28491	124	0.0666	487	1
dDocent_Contig_24536	19	0.06667	494	1
dDocent_Contig_4646	198	0.06674	486	1
dDocent_Contig_14037	100	0.06687	485	1
dDocent_Contig_7762	61	0.06694	492	1
dDocent_Contig_57030	181	0.06701	484	1
dDocent_Contig_46274	193	0.06735	489	1
dDocent_Contig_1346	74	0.06743	481	1
dDocent_Contig_14641	91	0.06743	481	1
dDocent_Contig_19049	116	0.06743	481	1
dDocent_Contig_35721	206	0.06743	481	1
dDocent_Contig_14592	229	0.06743	481	1
dDocent_Contig_56371	29	0.06748	488	1
dDocent_Contig_56371	63	0.06748	488	1
dDocent_Contig_34631	176	0.06757	480	1
dDocent_Contig_54830	185	0.06757	480	1
dDocent_Contig_48887	257	0.06757	480	1
dDocent_Contig_35273	288	0.06757	480	1
dDocent_Contig_5594	103	0.06762	487	1
dDocent_Contig_44455	174	0.06771	479	1
dDocent_Contig_40112	167	0.06785	478	1
dDocent_Contig_52702	203	0.06785	478	1
dDocent_Contig_46037	12	0.06799	477	1
dDocent_Contig_37560	32	0.06799	477	1
dDocent_Contig_28202	77	0.06799	477	1
dDocent_Contig_28202	82	0.06799	477	1
dDocent_Contig_23938	187	0.06799	477	1
dDocent_Contig_23938	196	0.06799	477	1
dDocent_Contig_46037	207	0.06799	477	1
dDocent_Contig_23938	213	0.06799	477	1
dDocent_Contig_23938	218	0.06799	477	1
dDocent_Contig_55452	243	0.06799	477	1
dDocent_Contig_40848	268	0.06799	477	1
dDocent_Contig_25954	270	0.06799	477	1
dDocent_Contig_18456	171	0.06804	484	1
dDocent_Contig_477	55	0.06813	476	1
dDocent_Contig_477	62	0.06813	476	1
dDocent_Contig_477	71	0.06813	476	1
dDocent_Contig_30862	252	0.06832	482	1
dDocent_Contig_3291	25	0.06842	474	1
dDocent_Contig_3291	37	0.06842	474	1
dDocent_Contig_15377	88	0.06846	481	1
dDocent_Contig_15377	113	0.06846	481	1
dDocent_Contig_3059	175	0.06846	481	1
dDocent_Contig_15377	219	0.06846	481	1
dDocent_Contig_15377	226	0.06846	481	1
dDocent_Contig_47719	15	0.06861	480	1
dDocent_Contig_43668	119	0.06861	480	1
dDocent_Contig_38557	251	0.06861	480	1
dDocent_Contig_6703	68	0.06875	479	1
dDocent_Contig_6703	225	0.06875	479	1
dDocent_Contig_18155	113	0.06886	471	1
dDocent_Contig_42921	167	0.06886	471	1
dDocent_Contig_11150	247	0.06886	471	1
dDocent_Contig_29501	253	0.06886	471	1
dDocent_Contig_29851	154	0.06889	478	1
dDocent_Contig_4318	235	0.06889	478	1
dDocent_Contig_15223	53	0.06904	477	1
dDocent_Contig_38243	25	0.06915	469	1
dDocent_Contig_37171	130	0.06915	469	1
dDocent_Contig_37171	167	0.06915	469	1
dDocent_Contig_37171	192	0.06915	469	1
dDocent_Contig_3941	36	0.0693	468	1
dDocent_Contig_11211	52	0.0693	468	1
dDocent_Contig_25229	194	0.0693	468	1
dDocent_Contig_25229	200	0.0693	468	1
dDocent_Contig_25229	213	0.0693	468	1
dDocent_Contig_15267	20	0.06933	475	1
dDocent_Contig_19333	43	0.06933	475	1
dDocent_Contig_11764	283	0.06933	475	1
dDocent_Contig_26703	297	0.06933	475	1
dDocent_Contig_22765	41	0.06947	474	1
dDocent_Contig_36128	118	0.06959	466	1
dDocent_Contig_33779	48	0.06962	473	1
dDocent_Contig_2332	113	0.06962	473	1
dDocent_Contig_20875	196	0.06962	473	1
dDocent_Contig_34118	23	0.06974	465	1
dDocent_Contig_28667	227	0.06974	465	1
dDocent_Contig_28667	242	0.06974	465	1
dDocent_Contig_6253	135	0.06992	471	1
dDocent_Contig_25250	178	0.06992	471	1
dDocent_Contig_6253	179	0.06992	471	1
dDocent_Contig_6253	224	0.06992	471	1
dDocent_Contig_9076	30	0.07006	470	1
dDocent_Contig_52104	97	0.07006	470	1
dDocent_Contig_42950	197	0.07006	470	1
dDocent_Contig_4840	13	0.07019	462	1
dDocent_Contig_25831	78	0.07019	462	1
dDocent_Contig_2925	271	0.07019	462	1
dDocent_Contig_2509	23	0.07021	469	1
dDocent_Contig_59156	179	0.07021	469	1
dDocent_Contig_18279	20	0.07036	468	1
dDocent_Contig_58028	196	0.07036	468	1
dDocent_Contig_1805	215	0.0705	460	1
dDocent_Contig_37672	229	0.0705	460	1
dDocent_Contig_50160	244	0.0705	460	1
dDocent_Contig_37672	248	0.0705	460	1
dDocent_Contig_49545	8	0.07051	467	1
dDocent_Contig_49545	69	0.07051	467	1
dDocent_Contig_7807	170	0.07051	467	1
dDocent_Contig_34584	216	0.07051	467	1
dDocent_Contig_1644	31	0.07065	459	1
dDocent_Contig_10822	89	0.07065	459	1
dDocent_Contig_20287	284	0.07065	459	1
dDocent_Contig_32798	329	0.07065	459	1
dDocent_Contig_45882	125	0.07081	458	1
dDocent_Contig_31315	278	0.07081	458	1
dDocent_Contig_2043	66	0.07082	465	1
dDocent_Contig_36452	75	0.07082	465	1
dDocent_Contig_49320	175	0.07082	465	1
dDocent_Contig_10574	260	0.07082	465	1
dDocent_Contig_49628	280	0.07082	465	1
dDocent_Contig_6416	67	0.07096	457	1
dDocent_Contig_38404	40	0.07097	464	1
dDocent_Contig_1761	218	0.07097	464	1
dDocent_Contig_47506	270	0.07097	464	1
dDocent_Contig_28311	204	0.07112	456	1
dDocent_Contig_16727	85	0.07127	455	1
dDocent_Contig_28335	51	0.07143	454	1
dDocent_Contig_27455	54	0.07143	461	1
dDocent_Contig_34590	99	0.07158	460	1
dDocent_Contig_5667	135	0.07158	460	1
dDocent_Contig_34590	172	0.07158	460	1
dDocent_Contig_35771	75	0.07174	459	1
dDocent_Contig_40461	100	0.07174	452	1
dDocent_Contig_25955	176	0.07174	459	1
dDocent_Contig_6458	208	0.07174	459	1
dDocent_Contig_6458	216	0.07174	459	1
dDocent_Contig_9550	264	0.07174	459	1
dDocent_Contig_11289	9	0.0719	451	1
dDocent_Contig_1507	95	0.0719	451	1
dDocent_Contig_2790	138	0.0719	451	1
dDocent_Contig_11289	212	0.0719	451	1
dDocent_Contig_1507	222	0.0719	451	1
dDocent_Contig_47506	244	0.0719	458	1
dDocent_Contig_1507	263	0.0719	451	1
dDocent_Contig_8547	166	0.07205	457	1
dDocent_Contig_5190	8	0.07222	449	1
dDocent_Contig_5190	43	0.07222	449	1
dDocent_Contig_5190	66	0.07222	449	1
dDocent_Contig_5190	207	0.07222	449	1
dDocent_Contig_5190	217	0.07222	449	1
dDocent_Contig_4114	8	0.07238	448	1
dDocent_Contig_4114	23	0.07238	448	1
dDocent_Contig_4114	216	0.07238	448	1
dDocent_Contig_4114	261	0.07238	448	1
dDocent_Contig_5624	25	0.07253	454	1
dDocent_Contig_56068	276	0.07253	454	1
dDocent_Contig_50347	31	0.07269	453	1
dDocent_Contig_22139	91	0.07269	453	1
dDocent_Contig_22139	181	0.07269	453	1
dDocent_Contig_22139	202	0.07269	453	1
dDocent_Contig_23416	44	0.07271	446	1
dDocent_Contig_3408	268	0.07271	446	1
dDocent_Contig_9832	207	0.07285	452	1
dDocent_Contig_29282	258	0.07285	452	1
dDocent_Contig_4102	187	0.07301	451	1
dDocent_Contig_3066	211	0.07301	451	1
dDocent_Contig_31396	102	0.07303	444	1
dDocent_Contig_31396	109	0.07303	444	1
dDocent_Contig_6529	161	0.07303	444	1
dDocent_Contig_2216	37	0.07317	450	1
dDocent_Contig_3760	95	0.0732	443	1
dDocent_Contig_3760	136	0.0732	443	1
dDocent_Contig_3760	242	0.0732	443	1
dDocent_Contig_15134	247	0.0732	443	1
dDocent_Contig_14177	277	0.0732	443	1
dDocent_Contig_37911	156	0.07333	449	1
dDocent_Contig_8421	275	0.07333	449	1
dDocent_Contig_30832	71	0.07336	442	1
dDocent_Contig_24363	9	0.0737	440	1
dDocent_Contig_5295	13	0.0737	440	1
dDocent_Contig_14279	222	0.0737	440	1
dDocent_Contig_46801	222	0.0737	440	1
dDocent_Contig_14279	227	0.0737	440	1
dDocent_Contig_30352	228	0.0737	440	1
dDocent_Contig_46801	243	0.0737	440	1
dDocent_Contig_46801	274	0.0737	440	1
dDocent_Contig_33309	71	0.07386	439	1
dDocent_Contig_21795	258	0.07386	439	1
dDocent_Contig_25628	272	0.07386	439	1
dDocent_Contig_26891	107	0.07399	445	1
dDocent_Contig_27268	70	0.07403	438	1
dDocent_Contig_20126	292	0.07416	444	1
dDocent_Contig_10745	155	0.0742	437	1
dDocent_Contig_33912	165	0.0742	437	1
dDocent_Contig_57686	34	0.07437	436	1
dDocent_Contig_15396	167	0.07437	436	1
dDocent_Contig_33346	140	0.07454	435	1
dDocent_Contig_50102	200	0.07454	435	1
dDocent_Contig_44351	231	0.07454	435	1
dDocent_Contig_2707	238	0.07454	435	1
dDocent_Contig_44351	278	0.07454	435	1
dDocent_Contig_35597	106	0.07466	441	1
dDocent_Contig_20633	239	0.07466	441	1
dDocent_Contig_17313	68	0.07483	440	1
dDocent_Contig_17313	187	0.07483	440	1
dDocent_Contig_17313	224	0.07483	440	1
dDocent_Contig_46624	60	0.07488	433	1
dDocent_Contig_45238	207	0.075	439	1
dDocent_Contig_44145	29	0.07506	432	1
dDocent_Contig_34591	113	0.07506	432	1
dDocent_Contig_30242	165	0.07506	432	1
dDocent_Contig_35057	35	0.07517	438	1
dDocent_Contig_2190	182	0.07523	431	1
dDocent_Contig_11852	254	0.07523	431	1
dDocent_Contig_186	22	0.07534	437	1
dDocent_Contig_4814	281	0.07534	437	1
dDocent_Contig_7014	250	0.07541	430	1
dDocent_Contig_3018	273	0.07541	430	1
dDocent_Contig_814	115	0.07558	429	1
dDocent_Contig_33279	247	0.07569	435	1
dDocent_Contig_33279	271	0.07569	435	1
dDocent_Contig_16727	208	0.07576	428	1
dDocent_Contig_11181	209	0.07586	434	1
dDocent_Contig_18297	180	0.07593	427	1
dDocent_Contig_23510	84	0.07604	433	1
dDocent_Contig_23510	107	0.07604	433	1
dDocent_Contig_23471	273	0.07611	426	1
dDocent_Contig_10011	284	0.07611	426	1
dDocent_Contig_3856	17	0.07629	425	1
dDocent_Contig_3856	175	0.07629	425	1
dDocent_Contig_5348	107	0.07657	430	1
dDocent_Contig_18249	123	0.07657	430	1
dDocent_Contig_18249	195	0.07657	430	1
dDocent_Contig_24144	46	0.07665	423	1
dDocent_Contig_16949	181	0.07665	423	1
dDocent_Contig_38950	211	0.07665	423	1
dDocent_Contig_14048	154	0.07674	429	1
dDocent_Contig_16342	25	0.07701	421	1
dDocent_Contig_11952	53	0.07701	421	1
dDocent_Contig_30788	78	0.07701	421	1
dDocent_Contig_39429	64	0.0771	427	1
dDocent_Contig_44942	69	0.0772	420	1
dDocent_Contig_44942	251	0.0772	420	1
dDocent_Contig_36657	102	0.07728	426	1
dDocent_Contig_21964	108	0.07728	426	1
dDocent_Contig_36657	258	0.07728	426	1
dDocent_Contig_46801	9	0.07738	419	1
dDocent_Contig_9501	11	0.07738	419	1
dDocent_Contig_46801	16	0.07738	419	1
dDocent_Contig_9501	41	0.07738	419	1
dDocent_Contig_9501	82	0.07738	419	1
dDocent_Contig_9501	96	0.07738	419	1
dDocent_Contig_46801	128	0.07738	419	1
dDocent_Contig_8913	270	0.07738	419	1
dDocent_Contig_22051	26	0.07746	425	1
dDocent_Contig_20480	95	0.07746	425	1
dDocent_Contig_22686	98	0.07746	425	1
dDocent_Contig_20480	109	0.07746	425	1
dDocent_Contig_22686	152	0.07746	425	1
dDocent_Contig_22051	186	0.07746	425	1
dDocent_Contig_10351	239	0.07757	418	1
dDocent_Contig_7325	267	0.07757	418	1
dDocent_Contig_51284	173	0.07765	424	1
dDocent_Contig_51284	212	0.07765	424	1
dDocent_Contig_51284	284	0.07765	424	1
dDocent_Contig_10432	165	0.07775	417	1
dDocent_Contig_11155	14	0.07783	423	1
dDocent_Contig_28491	178	0.07801	422	1
dDocent_Contig_45142	14	0.07812	415	1
dDocent_Contig_45142	113	0.07812	415	1
dDocent_Contig_35706	235	0.07812	415	1
dDocent_Contig_14346	11	0.0782	421	1
dDocent_Contig_26031	214	0.0782	421	1
dDocent_Contig_18126	285	0.0782	421	1
dDocent_Contig_38592	91	0.07831	414	1
dDocent_Contig_11155	187	0.07831	414	1
dDocent_Contig_7754	207	0.07831	414	1
dDocent_Contig_29481	68	0.07838	420	1
dDocent_Contig_19535	118	0.07838	420	1
dDocent_Contig_28083	161	0.0785	413	1
dDocent_Contig_7814	174	0.07857	419	1
dDocent_Contig_45106	260	0.07857	419	1
dDocent_Contig_13119	157	0.07876	418	1
dDocent_Contig_43088	81	0.07888	411	1
dDocent_Contig_32615	125	0.07888	411	1
dDocent_Contig_43088	161	0.07888	411	1
dDocent_Contig_43088	183	0.07888	411	1
dDocent_Contig_43088	206	0.07888	411	1
dDocent_Contig_43088	212	0.07888	411	1
dDocent_Contig_43088	239	0.07888	411	1
dDocent_Contig_43088	279	0.07888	411	1
dDocent_Contig_29213	123	0.07895	417	1
dDocent_Contig_40197	228	0.07895	417	1
dDocent_Contig_40197	251	0.07895	417	1
dDocent_Contig_52661	16	0.07901	404	1
dDocent_Contig_31896	86	0.07901	404	1
dDocent_Contig_19270	192	0.07901	404	1
dDocent_Contig_19270	246	0.07901	404	1
dDocent_Contig_12062	312	0.07901	404	1
dDocent_Contig_42950	77	0.07908	410	1
dDocent_Contig_50507	186	0.07908	410	1
dDocent_Contig_50507	205	0.07908	410	1
dDocent_Contig_17302	60	0.07921	403	1
dDocent_Contig_10289	86	0.07921	403	1
dDocent_Contig_17302	122	0.07921	403	1
dDocent_Contig_17302	290	0.07921	403	1
dDocent_Contig_2947	49	0.07927	409	1
dDocent_Contig_51600	60	0.07927	409	1
dDocent_Contig_35390	97	0.07927	409	1
dDocent_Contig_11415	133	0.07927	409	1
dDocent_Contig_20382	197	0.07927	409	1
dDocent_Contig_7053	50	0.0794	402	1
dDocent_Contig_7053	130	0.0794	402	1
dDocent_Contig_7513	239	0.07946	408	1
dDocent_Contig_33808	111	0.0796	401	1
dDocent_Contig_49293	123	0.0796	401	1
dDocent_Contig_33808	157	0.0796	401	1
dDocent_Contig_43858	187	0.0796	401	1
dDocent_Contig_43858	270	0.0796	401	1
dDocent_Contig_12146	8	0.07971	413	1
dDocent_Contig_47776	95	0.0798	400	1
dDocent_Contig_28900	220	0.0798	400	1
dDocent_Contig_8646	27	0.07985	406	1
dDocent_Contig_27845	140	0.07985	406	1
dDocent_Contig_48714	271	0.07985	406	1
dDocent_Contig_582	282	0.0799	412	1
dDocent_Contig_27553	156	0.08	399	1
dDocent_Contig_35452	283	0.08005	405	1
dDocent_Contig_46953	40	0.0802	398	1
dDocent_Contig_23302	57	0.0802	398	1
dDocent_Contig_2804	8	0.08025	404	1
dDocent_Contig_21181	211	0.08025	404	1
dDocent_Contig_24046	120	0.08029	410	1
dDocent_Contig_6551	99	0.0804	397	1
dDocent_Contig_11961	233	0.0804	397	1
dDocent_Contig_17685	20	0.08045	403	1
dDocent_Contig_17685	164	0.08045	403	1
dDocent_Contig_17685	230	0.08045	403	1
dDocent_Contig_49669	174	0.0806	396	1
dDocent_Contig_49669	238	0.0806	396	1
dDocent_Contig_18778	125	0.08065	402	1
dDocent_Contig_6391	125	0.08065	402	1
dDocent_Contig_23465	37	0.08081	395	1
dDocent_Contig_32857	54	0.08081	395	1
dDocent_Contig_24406	90	0.08081	395	1
dDocent_Contig_32857	91	0.08081	395	1
dDocent_Contig_23465	108	0.08081	395	1
dDocent_Contig_23465	118	0.08081	395	1
dDocent_Contig_23465	169	0.08081	395	1
dDocent_Contig_23465	188	0.08081	395	1
dDocent_Contig_24406	214	0.08081	395	1
dDocent_Contig_23465	224	0.08081	395	1
dDocent_Contig_10460	233	0.08081	395	1
dDocent_Contig_12066	282	0.08081	395	1
dDocent_Contig_32857	284	0.08081	395	1
dDocent_Contig_48649	134	0.08085	401	1
dDocent_Contig_28764	179	0.08085	401	1
dDocent_Contig_11796	104	0.08101	394	1
dDocent_Contig_17147	118	0.08101	394	1
dDocent_Contig_17147	200	0.08101	394	1
dDocent_Contig_23032	236	0.08101	394	1
dDocent_Contig_31873	76	0.08105	400	1
dDocent_Contig_31873	107	0.08105	400	1
dDocent_Contig_31873	182	0.08105	400	1
dDocent_Contig_16990	44	0.08122	393	1
dDocent_Contig_16226	253	0.08122	393	1
dDocent_Contig_6661	59	0.08125	399	1
dDocent_Contig_37126	63	0.08125	399	1
dDocent_Contig_37126	133	0.08125	399	1
dDocent_Contig_1198	257	0.08125	399	1
dDocent_Contig_4778	39	0.08142	392	1
dDocent_Contig_18456	187	0.08142	392	1
dDocent_Contig_7743	193	0.08142	392	1
dDocent_Contig_15060	226	0.08142	392	1
dDocent_Contig_44286	274	0.08142	392	1
dDocent_Contig_13639	61	0.08163	391	1
dDocent_Contig_13639	255	0.08163	391	1
dDocent_Contig_33153	85	0.08166	397	1
dDocent_Contig_2925	105	0.08166	397	1
dDocent_Contig_56947	125	0.08166	397	1
dDocent_Contig_33153	161	0.08166	397	1
dDocent_Contig_33153	168	0.08166	397	1
dDocent_Contig_2925	173	0.08166	397	1
dDocent_Contig_24158	208	0.08166	397	1
dDocent_Contig_2925	250	0.08166	397	1
dDocent_Contig_43284	30	0.08184	390	1
dDocent_Contig_14763	69	0.08184	390	1
dDocent_Contig_38022	83	0.08184	390	1
dDocent_Contig_14763	131	0.08184	390	1
dDocent_Contig_1764	283	0.08184	390	1
dDocent_Contig_42009	88	0.08186	396	1
dDocent_Contig_37935	248	0.08186	396	1
dDocent_Contig_6529	16	0.08205	389	1
dDocent_Contig_12374	76	0.08205	389	1
dDocent_Contig_18786	141	0.08205	389	1
dDocent_Contig_5268	198	0.08205	389	1
dDocent_Contig_18731	53	0.08226	388	1
dDocent_Contig_16423	60	0.08226	388	1
dDocent_Contig_21108	109	0.08226	388	1
dDocent_Contig_18665	85	0.08228	394	1
dDocent_Contig_37793	9	0.08247	387	1
dDocent_Contig_58229	198	0.08247	387	1
dDocent_Contig_25508	71	0.08249	393	1
dDocent_Contig_9298	195	0.08249	393	1
dDocent_Contig_32138	177	0.08269	386	1
dDocent_Contig_15756	231	0.08269	386	1
dDocent_Contig_27408	66	0.0827	392	1
dDocent_Contig_51050	43	0.0829	385	1
dDocent_Contig_35430	277	0.0829	385	1
dDocent_Contig_39189	21	0.08291	391	1
dDocent_Contig_33233	181	0.08291	391	1
dDocent_Contig_45460	273	0.08291	391	1
dDocent_Contig_7173	106	0.08312	390	1
dDocent_Contig_7173	161	0.08312	390	1
dDocent_Contig_25376	46	0.08333	383	1
dDocent_Contig_4372	157	0.08333	389	1
dDocent_Contig_58283	84	0.08355	388	1
dDocent_Contig_58283	115	0.08355	388	1
dDocent_Contig_32239	161	0.08355	382	1
dDocent_Contig_15396	186	0.08355	382	1
dDocent_Contig_15396	205	0.08355	382	1
dDocent_Contig_15396	211	0.08355	382	1
dDocent_Contig_15396	218	0.08355	382	1
dDocent_Contig_15396	223	0.08355	382	1
dDocent_Contig_15396	229	0.08355	382	1
dDocent_Contig_30778	235	0.08355	388	1
dDocent_Contig_15396	248	0.08355	382	1
dDocent_Contig_15396	256	0.08355	382	1
dDocent_Contig_7344	260	0.08355	388	1
dDocent_Contig_15396	261	0.08355	382	1
dDocent_Contig_15396	268	0.08355	382	1
dDocent_Contig_36421	277	0.08355	388	1
dDocent_Contig_7428	121	0.08376	387	1
dDocent_Contig_16197	126	0.08376	387	1
dDocent_Contig_23923	163	0.08376	387	1
dDocent_Contig_13752	132	0.08377	381	1
dDocent_Contig_7325	199	0.08377	381	1
dDocent_Contig_12901	61	0.08398	386	1
dDocent_Contig_18213	13	0.0842	385	1
dDocent_Contig_9865	216	0.08421	379	1
dDocent_Contig_30024	165	0.08443	378	1
dDocent_Contig_18286	185	0.08443	378	1
dDocent_Contig_24046	262	0.08443	378	1
dDocent_Contig_737	173	0.08464	383	1
dDocent_Contig_51786	89	0.08466	377	1
dDocent_Contig_5690	98	0.08466	377	1
dDocent_Contig_51786	111	0.08466	377	1
dDocent_Contig_35435	236	0.08466	377	1
dDocent_Contig_19032	271	0.08466	377	1
dDocent_Contig_47553	112	0.08486	382	1
dDocent_Contig_47553	124	0.08486	382	1
dDocent_Contig_47553	140	0.08486	382	1
dDocent_Contig_47553	174	0.08486	382	1
dDocent_Contig_7814	182	0.08488	376	1
dDocent_Contig_29916	44	0.08508	381	1
dDocent_Contig_24244	106	0.08511	375	1
dDocent_Contig_24244	238	0.08511	375	1
dDocent_Contig_8676	255	0.08511	375	1
dDocent_Contig_5130	288	0.08511	375	1
dDocent_Contig_22870	12	0.0853	380	1
dDocent_Contig_4220	201	0.0853	380	1
dDocent_Contig_6387	243	0.0853	380	1
dDocent_Contig_4220	248	0.0853	380	1
dDocent_Contig_4220	268	0.0853	380	1
dDocent_Contig_29982	126	0.08553	379	1
dDocent_Contig_18266	41	0.08556	373	1
dDocent_Contig_11606	141	0.08556	373	1
dDocent_Contig_6800	153	0.08556	373	1
dDocent_Contig_18266	171	0.08556	373	1
dDocent_Contig_18266	187	0.08556	373	1
dDocent_Contig_18266	219	0.08556	373	1
dDocent_Contig_21566	247	0.08556	373	1
dDocent_Contig_20003	253	0.08556	373	1
dDocent_Contig_43089	88	0.08575	378	1
dDocent_Contig_21790	130	0.08575	378	1
dDocent_Contig_52629	35	0.08579	372	1
dDocent_Contig_26891	58	0.08579	372	1
dDocent_Contig_52629	94	0.08579	372	1
dDocent_Contig_25305	141	0.08579	372	1
dDocent_Contig_52629	209	0.08579	372	1
dDocent_Contig_441	212	0.08579	372	1
dDocent_Contig_19049	122	0.08598	377	1
dDocent_Contig_1681	13	0.08602	371	1
dDocent_Contig_1681	27	0.08602	371	1
dDocent_Contig_33996	30	0.08602	371	1
dDocent_Contig_7563	92	0.08602	371	1
dDocent_Contig_1681	96	0.08602	371	1
dDocent_Contig_26364	134	0.08602	371	1
dDocent_Contig_10756	213	0.08602	371	1
dDocent_Contig_8491	266	0.08602	371	1
dDocent_Contig_11091	77	0.08621	376	1
dDocent_Contig_25376	108	0.08621	376	1
dDocent_Contig_11091	141	0.08621	376	1
dDocent_Contig_7783	13	0.08625	370	1
dDocent_Contig_24329	50	0.08625	370	1
dDocent_Contig_24329	56	0.08625	370	1
dDocent_Contig_50781	137	0.08625	370	1
dDocent_Contig_8768	41	0.08644	375	1
dDocent_Contig_16618	208	0.08649	369	1
dDocent_Contig_33131	214	0.08649	369	1
dDocent_Contig_58710	214	0.08667	374	1
dDocent_Contig_23797	262	0.08667	374	1
dDocent_Contig_36266	182	0.08672	368	1
dDocent_Contig_12127	257	0.08672	368	1
dDocent_Contig_23064	19	0.08696	367	1
dDocent_Contig_54523	21	0.08713	372	1
dDocent_Contig_16274	37	0.08713	372	1
dDocent_Contig_9225	59	0.08713	372	1
dDocent_Contig_2468	83	0.08713	372	1
dDocent_Contig_9225	90	0.08713	372	1
dDocent_Contig_51152	92	0.08713	372	1
dDocent_Contig_35406	115	0.08713	372	1
dDocent_Contig_9225	202	0.08713	372	1
dDocent_Contig_27892	131	0.08719	366	1
dDocent_Contig_2746	180	0.08719	366	1
dDocent_Contig_23061	186	0.08719	366	1
dDocent_Contig_45493	200	0.08719	366	1
dDocent_Contig_29059	206	0.08719	366	1
dDocent_Contig_46697	227	0.08719	366	1
dDocent_Contig_46697	245	0.08719	366	1
dDocent_Contig_45493	247	0.08719	366	1
dDocent_Contig_17668	237	0.08743	365	1
dDocent_Contig_28065	106	0.0876	370	1
dDocent_Contig_30557	63	0.08767	364	1
dDocent_Contig_19753	112	0.08767	364	1
dDocent_Contig_30557	205	0.08767	364	1
dDocent_Contig_3340	243	0.08767	364	1
dDocent_Contig_3340	248	0.08767	364	1
dDocent_Contig_8379	266	0.08767	364	1
dDocent_Contig_14572	121	0.08784	369	1
dDocent_Contig_6406	217	0.08784	369	1
dDocent_Contig_18933	223	0.08784	369	1
dDocent_Contig_35380	276	0.08784	369	1
dDocent_Contig_29009	277	0.08784	369	1
dDocent_Contig_5618	111	0.08791	363	1
dDocent_Contig_2453	245	0.08791	363	1
dDocent_Contig_20529	61	0.08808	368	1
dDocent_Contig_23652	213	0.08808	368	1
dDocent_Contig_20014	95	0.08815	362	1
dDocent_Contig_31442	163	0.08815	362	1
dDocent_Contig_17165	185	0.08815	362	1
dDocent_Contig_51632	23	0.08832	367	1
dDocent_Contig_51632	245	0.08832	367	1
dDocent_Contig_5969	215	0.0884	361	1
dDocent_Contig_17661	256	0.0884	361	1
dDocent_Contig_6661	300	0.0884	361	1
dDocent_Contig_20126	255	0.08864	360	1
dDocent_Contig_3507	267	0.08864	360	1
dDocent_Contig_20126	275	0.08864	360	1
dDocent_Contig_15426	329	0.08864	360	1
dDocent_Contig_19320	77	0.0888	365	1
dDocent_Contig_13195	154	0.08889	359	1
dDocent_Contig_3308	211	0.08889	359	1
dDocent_Contig_3760	252	0.08889	359	1
dDocent_Contig_3308	264	0.08889	359	1
dDocent_Contig_32939	168	0.08904	364	1
dDocent_Contig_32939	224	0.08904	364	1
dDocent_Contig_5117	247	0.08904	364	1
dDocent_Contig_34894	213	0.08914	358	1
dDocent_Contig_7571	215	0.08914	358	1
dDocent_Contig_18880	13	0.08929	363	1
dDocent_Contig_17017	217	0.08939	357	1
dDocent_Contig_42465	226	0.08939	357	1
dDocent_Contig_17764	26	0.08953	362	1
dDocent_Contig_19510	44	0.08964	356	1
dDocent_Contig_7147	91	0.08964	356	1
dDocent_Contig_14944	10	0.08978	361	1
dDocent_Contig_3243	57	0.09014	354	1
dDocent_Contig_3243	163	0.09014	354	1
dDocent_Contig_3243	270	0.09014	354	1
dDocent_Contig_42391	44	0.09028	359	1
dDocent_Contig_22352	127	0.0904	353	1
dDocent_Contig_3547	190	0.0904	353	1
dDocent_Contig_15174	210	0.09053	358	1
dDocent_Contig_18508	225	0.09065	352	1
dDocent_Contig_14303	281	0.09065	352	1
dDocent_Contig_35775	72	0.09078	357	1
dDocent_Contig_21858	81	0.09078	357	1
dDocent_Contig_21858	167	0.09078	357	1
dDocent_Contig_35775	209	0.09078	357	1
dDocent_Contig_21858	225	0.09078	357	1
dDocent_Contig_35775	248	0.09078	357	1
dDocent_Contig_33342	257	0.09078	357	1
dDocent_Contig_3933	81	0.09104	356	1
dDocent_Contig_42482	170	0.09104	356	1
dDocent_Contig_13389	175	0.09104	356	1
[truncated: 125,278 more rows]

## Sheet: S2b  A.dowei compatible morphs 
#Supplementary Table S2b. RADtags in Anableps dowei and their association with the direction of genital asymmetry based on PLINK considering compatible morphs (i.e. males with their gonopodium bending to the right and females with the foricula of the gonopore opening to the left).
#Columns A-E: output of the association mapping conducted in PLINK.
# CHR: RADtag name. RADtags were named by using the dDocent generated ID.
# SNP: The SNP ID referst to the physical position of the allelic variation in the specific RADtag
# perm.adj.P-value: Empirical p-value obtained from an adaptive permutation test based on the most significant result of ALLELIC, DOM and REC models
# NP: number of permutation replicas conducteed to determine EMP1
#p.BH.adj: P-value corrected for family-wise error for multiple testing using Benjamini-Hochberg false discovery rate
CHR	SNP	perm.adj.P-value	NP	p.BH.adj
dDocent_Contig_55191	258	1.95e-05	1000000	0.5181
dDocent_Contig_1021	181	5.145e-05	680319	0.6841
dDocent_Contig_34745	188	9.147e-05	388115	0.8103
dDocent_Contig_35094	36	0.0001538	227611	0.9799
dDocent_Contig_27898	99	0.0003777	92653	0.9799
dDocent_Contig_31860	224	0.0004423	79123	0.9799
dDocent_Contig_34771	38	0.000541	64695	0.9799
dDocent_Contig_37235	110	0.0005906	59265	0.9799
dDocent_Contig_37762	99	0.0006815	51357	0.9799
dDocent_Contig_32405	253	0.0006857	51045	0.9799
dDocent_Contig_54628	262	0.0007299	48633	0.9799
dDocent_Contig_57769	211	0.0007585	46802	0.9799
dDocent_Contig_8538	24	0.0008133	43650	0.9799
dDocent_Contig_45333	90	0.0009211	37998	0.9799
dDocent_Contig_43165	182	0.0009408	37200	0.9799
dDocent_Contig_44534	69	0.0009447	37048	0.9799
dDocent_Contig_8411	49	0.0009777	36307	0.9799
dDocent_Contig_31611	68	0.0009817	35651	0.9799
dDocent_Contig_43469	115	0.0009937	35723	0.9799
dDocent_Contig_38690	217	0.001051	33309	0.9799
dDocent_Contig_22058	181	0.00116	30184	0.9799
dDocent_Contig_11550	301	0.001185	29969	0.9799
dDocent_Contig_39537	91	0.001227	28516	0.9799
dDocent_Contig_17662	219	0.001245	28516	0.9799
dDocent_Contig_14917	98	0.001464	24252	0.9799
dDocent_Contig_2741	81	0.001482	23618	0.9799
dDocent_Contig_5570	107	0.001508	23546	0.9799
dDocent_Contig_2642	57	0.001542	22696	0.9799
dDocent_Contig_12854	135	0.001592	22305	0.9799
dDocent_Contig_5637	15	0.001595	22259	0.9799
dDocent_Contig_31181	222	0.001687	21038	0.9799
dDocent_Contig_14142	221	0.001691	20701	0.9799
dDocent_Contig_5428	16	0.001717	20680	0.9799
dDocent_Contig_29069	152	0.001787	19868	0.9799
dDocent_Contig_19185	160	0.001789	19568	0.9799
dDocent_Contig_28639	263	0.0018	19448	0.9799
dDocent_Contig_9292	256	0.001826	19168	0.9799
dDocent_Contig_9292	66	0.001826	19168	0.9799
dDocent_Contig_8962	89	0.001892	18495	0.9799
dDocent_Contig_13060	183	0.001927	18419	0.9799
dDocent_Contig_6826	98	0.001928	18153	0.9799
dDocent_Contig_27675	40	0.002057	17011	0.9799
dDocent_Contig_31181	170	0.002099	16671	0.9799
dDocent_Contig_10473	132	0.002106	16620	0.9799
dDocent_Contig_7379	215	0.002112	16569	0.9799
dDocent_Contig_22265	88	0.00214	16586	0.9799
dDocent_Contig_38739	238	0.002161	16195	0.9799
dDocent_Contig_51604	103	0.002249	15560	0.9799
dDocent_Contig_8538	169	0.002293	15480	0.9799
dDocent_Contig_31674	83	0.002435	14580	0.9799
dDocent_Contig_37598	264	0.002441	14340	0.9799
dDocent_Contig_4661	17	0.002479	14115	0.9799
dDocent_Contig_19072	112	0.002534	14010	0.9799
dDocent_Contig_19072	119	0.002534	14010	0.9799
dDocent_Contig_19072	126	0.002534	14010	0.9799
dDocent_Contig_19072	15	0.002534	14010	0.9799
dDocent_Contig_19072	68	0.002534	14010	0.9799
dDocent_Contig_19072	87	0.002534	14010	0.9799
dDocent_Contig_25551	233	0.002554	13898	0.9799
dDocent_Contig_5445	158	0.002589	13520	0.9799
dDocent_Contig_6467	266	0.002627	13324	0.9799
dDocent_Contig_39522	288	0.002659	13352	0.9799
dDocent_Contig_43165	77	0.002673	13282	0.9799
dDocent_Contig_12261	121	0.002694	12989	0.9799
dDocent_Contig_3883	215	0.002697	12976	0.9799
dDocent_Contig_46636	280	0.002697	12976	0.9799
dDocent_Contig_32552	162	0.002747	12742	0.9799
dDocent_Contig_7012	176	0.002764	12664	0.9799
dDocent_Contig_45428	201	0.002789	12547	0.9799
dDocent_Contig_18917	61	0.002816	12430	0.9799
dDocent_Contig_10881	74	0.00282	12586	0.9799
dDocent_Contig_13779	67	0.002917	12170	0.9799
dDocent_Contig_46766	237	0.002994	11689	0.9799
dDocent_Contig_734	162	0.003099	11293	0.9799
dDocent_Contig_54873	196	0.003116	11233	0.9799
dDocent_Contig_1010	126	0.003159	11077	0.9799
dDocent_Contig_4612	141	0.003163	11221	0.9799
dDocent_Contig_16814	81	0.003232	10829	0.9799
dDocent_Contig_35407	99	0.003408	10268	0.9799
dDocent_Contig_55694	268	0.003483	10048	0.9799
dDocent_Contig_26470	153	0.003487	10180	0.9799
dDocent_Contig_26470	65	0.003487	10180	0.9799
dDocent_Contig_5675	200	0.00365	9724	0.9799
dDocent_Contig_54105	181	0.003663	9554	0.9799
dDocent_Contig_37235	56	0.003665	9684	0.9799
dDocent_Contig_17790	115	0.003692	9614	0.9799
dDocent_Contig_55997	111	0.003731	9514	0.9799
dDocent_Contig_21124	244	0.003757	9314	0.9799
dDocent_Contig_13680	90	0.003763	9434	0.9799
dDocent_Contig_7068	33	0.003782	9254	0.9799
dDocent_Contig_36116	251	0.003782	9254	0.9799
dDocent_Contig_32272	58	0.00384	9114	0.9799
dDocent_Contig_7746	186	0.00387	9044	0.9799
dDocent_Contig_27116	34	0.003934	8896	0.9799
dDocent_Contig_48111	117	0.00399	8770	0.9799
dDocent_Contig_4074	160	0.004047	8770	0.9799
dDocent_Contig_24845	283	0.004104	8527	0.9799
dDocent_Contig_2159	299	0.004139	8455	0.9799
dDocent_Contig_9995	276	0.00422	8293	0.9799
dDocent_Contig_8940	208	0.00422	8293	0.9799
dDocent_Contig_26055	189	0.004248	8239	0.9799
dDocent_Contig_42498	244	0.004314	8113	0.9799
dDocent_Contig_29038	124	0.004332	8194	0.9799
dDocent_Contig_21257	116	0.004338	8068	0.9799
dDocent_Contig_20418	7	0.00438	8104	0.9799
dDocent_Contig_11892	80	0.004398	7957	0.9799
dDocent_Contig_13394	131	0.004479	7813	0.9799
dDocent_Contig_14403	34	0.004511	7757	0.9799
dDocent_Contig_8715	70	0.00453	7725	0.9799
dDocent_Contig_29069	67	0.00454	7709	0.9799
dDocent_Contig_19252	9	0.004665	7501	0.9799
dDocent_Contig_27627	139	0.004667	7605	0.9799
dDocent_Contig_11249	36	0.004685	7469	0.9799
dDocent_Contig_12121	193	0.004726	7405	0.9799
dDocent_Contig_10315	71	0.004726	7405	0.9799
dDocent_Contig_58609	245	0.004884	7165	0.9799
dDocent_Contig_3974	226	0.004932	7197	0.9799
dDocent_Contig_17821	29	0.004954	7165	0.9799
dDocent_Contig_2943	265	0.005041	6942	0.9799
dDocent_Contig_23452	45	0.005108	6851	0.9799
dDocent_Contig_27116	75	0.005118	6837	0.9799
dDocent_Contig_2121	77	0.00515	6795	0.9799
dDocent_Contig_8176	193	0.005204	6725	0.9799
dDocent_Contig_4034	64	0.005215	6711	0.9799
dDocent_Contig_27993	37	0.005218	6802	0.9799
dDocent_Contig_23431	28	0.005258	6655	0.9799
dDocent_Contig_23431	51	0.005258	6655	0.9799
dDocent_Contig_29451	176	0.005284	6718	0.9799
dDocent_Contig_3076	80	0.005286	6620	0.9799
dDocent_Contig_5757	193	0.00532	6578	0.9799
dDocent_Contig_31656	157	0.005326	6571	0.9799
dDocent_Contig_25551	26	0.005424	6452	0.9799
dDocent_Contig_42977	181	0.005483	6473	0.9799
dDocent_Contig_6576	129	0.005495	6368	0.9799
dDocent_Contig_11356	9	0.005569	6284	0.9799
dDocent_Contig_42801	102	0.005644	6200	0.9799
dDocent_Contig_37333	81	0.005655	6277	0.9799
dDocent_Contig_26078	214	0.005657	6186	0.9799
dDocent_Contig_43721	22	0.005676	6165	0.9799
dDocent_Contig_964	17	0.005686	6242	0.9799
dDocent_Contig_2542	33	0.005741	6095	0.9799
dDocent_Contig_53098	154	0.005754	6256	0.9799
dDocent_Contig_42850	235	0.005846	5986	0.9799
dDocent_Contig_19007	126	0.005875	5956	0.9799
dDocent_Contig_11544	103	0.005899	5932	0.9799
dDocent_Contig_6688	274	0.005977	5938	0.9799
dDocent_Contig_18917	220	0.006063	5854	0.9799
dDocent_Contig_12403	105	0.006082	5836	0.9799
dDocent_Contig_36799	182	0.006126	5794	0.9799
dDocent_Contig_21653	247	0.006129	5710	0.9799
dDocent_Contig_13726	9	0.006197	5728	0.9799
dDocent_Contig_2299	165	0.006294	5560	0.9799
dDocent_Contig_3410	85	0.006295	5638	0.9799
dDocent_Contig_50373	263	0.006404	5464	0.9799
dDocent_Contig_8114	120	0.006475	5404	0.9799
dDocent_Contig_13097	110	0.006497	5386	0.9799
dDocent_Contig_9193	12	0.006526	5362	0.9799
dDocent_Contig_36529	105	0.006642	5344	0.9799
dDocent_Contig_8999	16	0.006653	5260	0.9799
dDocent_Contig_25162	63	0.006687	5308	0.9799
dDocent_Contig_11980	279	0.006694	5302	0.9799
dDocent_Contig_15741	162	0.006729	5200	0.9799
dDocent_Contig_15350	30	0.006748	5260	0.9799
dDocent_Contig_1358	30	0.006826	5200	0.9799
dDocent_Contig_38275	120	0.006832	5122	0.9799
dDocent_Contig_39735	87	0.006849	5182	0.9799
dDocent_Contig_5445	84	0.007045	4967	0.9799
dDocent_Contig_30273	179	0.007081	4942	0.9799
dDocent_Contig_13940	14	0.007109	4922	0.9799
dDocent_Contig_33999	173	0.007175	4877	0.9799
dDocent_Contig_15726	78	0.00727	4882	0.9799
dDocent_Contig_36682	262	0.007348	4762	0.9799
dDocent_Contig_17652	157	0.007367	4682	0.9799
dDocent_Contig_18730	71	0.007403	4727	0.9799
dDocent_Contig_20033	44	0.007411	4722	0.9799
dDocent_Contig_53644	21	0.007442	4702	0.9799
dDocent_Contig_10242	283	0.00749	4672	0.9799
dDocent_Contig_15146	186	0.00749	4672	0.9799
dDocent_Contig_6092	91	0.007503	4597	0.9799
dDocent_Contig_11718	273	0.00767	4497	0.9799
dDocent_Contig_30683	202	0.007756	4447	0.9799
dDocent_Contig_8468	200	0.007799	4487	0.9799
dDocent_Contig_6882	12	0.007799	4487	0.9799
dDocent_Contig_22408	158	0.007809	4417	0.9799
dDocent_Contig_44060	161	0.007842	4462	0.9799
dDocent_Contig_10030	256	0.007869	4447	0.9799
dDocent_Contig_9452	90	0.007962	4332	0.9799
dDocent_Contig_50195	201	0.007995	4377	0.9799
dDocent_Contig_36018	160	0.008083	4267	0.9799
dDocent_Contig_11373	11	0.008096	4322	0.9799
dDocent_Contig_21264	180	0.008199	4207	0.9799
dDocent_Contig_36716	186	0.008358	4127	0.9799
dDocent_Contig_9403	127	0.008419	4097	0.9799
dDocent_Contig_32780	27	0.008502	4057	0.9799
dDocent_Contig_51615	41	0.008597	4012	0.9799
dDocent_Contig_8490	248	0.008604	4067	0.9799
dDocent_Contig_31181	191	0.008644	3990	0.9799
dDocent_Contig_14634	71	0.0087	4022	0.9799
dDocent_Contig_22710	185	0.008785	3926	0.9799
dDocent_Contig_26638	91	0.008794	3922	0.9799
dDocent_Contig_10098	137	0.00883	3906	0.9799
dDocent_Contig_10098	96	0.00883	3906	0.9799
dDocent_Contig_21109	274	0.009024	3822	0.9799
dDocent_Contig_8253	254	0.00907	3858	0.9799
dDocent_Contig_35558	94	0.009091	3794	0.9799
dDocent_Contig_342	126	0.009188	3754	0.9799
dDocent_Contig_57761	178	0.009267	3722	0.9799
dDocent_Contig_21748	199	0.009297	3710	0.9799
dDocent_Contig_3779	133	0.009311	3758	0.9799
dDocent_Contig_10242	264	0.009381	3730	0.9799
dDocent_Contig_21875	214	0.009481	3638	0.9799
dDocent_Contig_21875	237	0.009481	3638	0.9799
dDocent_Contig_58609	203	0.009586	3598	0.9799
dDocent_Contig_11925	188	0.009618	3586	0.9799
dDocent_Contig_7126	162	0.009618	3586	0.9799
dDocent_Contig_15011	118	0.009639	3630	0.9799
dDocent_Contig_9402	35	0.009725	3598	0.9799
dDocent_Contig_33785	232	0.009782	3526	0.9799
dDocent_Contig_2159	198	0.009782	3526	0.9799
dDocent_Contig_2159	267	0.009782	3526	0.9799
dDocent_Contig_2130	16	0.009801	3570	0.9799
dDocent_Contig_50205	247	0.009804	3518	0.9799
dDocent_Contig_9960	121	0.009804	3518	0.9799
dDocent_Contig_35952	51	0.01	3498	0.9799
dDocent_Contig_19152	222	0.0101	3466	0.9799
dDocent_Contig_13439	85	0.01015	3398	0.9799
dDocent_Contig_4247	165	0.0102	3430	0.9799
dDocent_Contig_20216	39	0.01023	3370	0.9799
dDocent_Contig_14832	18	0.01028	3354	0.9799
dDocent_Contig_14832	42	0.01028	3354	0.9799
dDocent_Contig_36373	187	0.01034	3334	0.9799
dDocent_Contig_40306	211	0.01036	3330	0.9799
dDocent_Contig_9	45	0.01039	3318	0.9799
dDocent_Contig_9292	11	0.01041	3410	0.9799
dDocent_Contig_5382	254	0.01042	3358	0.9799
dDocent_Contig_14877	126	0.01055	3270	0.9799
dDocent_Contig_27280	75	0.01056	3266	0.9799
dDocent_Contig_10242	221	0.01056	3266	0.9799
dDocent_Contig_10242	255	0.01056	3266	0.9799
dDocent_Contig_27936	183	0.0106	3302	0.9799
dDocent_Contig_38930	186	0.01061	3250	0.9799
dDocent_Contig_12754	266	0.01065	3286	0.9799
dDocent_Contig_27709	286	0.01072	3310	0.9799
dDocent_Contig_52889	101	0.01073	3214	0.9799
dDocent_Contig_24408	214	0.01081	3190	0.9799
dDocent_Contig_8298	244	0.01084	3182	0.9799
dDocent_Contig_17278	258	0.01084	3182	0.9799
dDocent_Contig_28940	195	0.01108	3114	0.9799
dDocent_Contig_28940	36	0.01108	3114	0.9799
dDocent_Contig_9312	32	0.01116	3090	0.9799
dDocent_Contig_2542	105	0.01121	3122	0.9799
dDocent_Contig_52174	282	0.01129	3054	0.9799
dDocent_Contig_6229	104	0.01144	3058	0.9799
dDocent_Contig_12403	254	0.01149	3002	0.9799
dDocent_Contig_43258	139	0.01152	2993	0.9799
dDocent_Contig_25495	124	0.01158	3022	0.9799
dDocent_Contig_12876	245	0.01163	2966	0.9799
dDocent_Contig_10977	127	0.01176	2933	0.9799
dDocent_Contig_46678	192	0.01184	2954	0.9799
dDocent_Contig_3151	31	0.01187	2948	0.9799
dDocent_Contig_2082	280	0.01199	2876	0.9799
dDocent_Contig_5256	242	0.012	2873	0.9799
dDocent_Contig_18909	180	0.012	2873	0.9799
dDocent_Contig_6075	55	0.01204	2864	0.9799
dDocent_Contig_1014	15	0.01205	2903	0.9799
dDocent_Contig_16052	23	0.01205	2903	0.9799
dDocent_Contig_10352	98	0.01205	2903	0.9799
dDocent_Contig_34760	256	0.01207	2858	0.9799
dDocent_Contig_3624	236	0.01211	2849	0.9799
dDocent_Contig_9048	125	0.01213	2843	0.9799
dDocent_Contig_14292	169	0.01213	2843	0.9799
dDocent_Contig_41305	126	0.01213	2885	0.9799
dDocent_Contig_10613	193	0.01213	2885	0.9799
dDocent_Contig_30166	201	0.01229	2807	0.9799
dDocent_Contig_11925	13	0.01233	2837	0.9799
dDocent_Contig_11650	29	0.01234	2795	0.9799
dDocent_Contig_21093	261	0.01247	2765	0.9799
dDocent_Contig_35517	253	0.0125	2798	0.9799
dDocent_Contig_47963	227	0.0125	2759	0.9799
dDocent_Contig_18659	166	0.01251	2756	0.9799
dDocent_Contig_13125	134	0.01262	2732	0.9799
dDocent_Contig_38739	26	0.01264	2729	0.9799
dDocent_Contig_18098	103	0.01265	2726	0.9799
dDocent_Contig_13693	120	0.01265	2765	0.9799
dDocent_Contig_37174	64	0.01275	2705	0.9799
dDocent_Contig_53954	215	0.01275	2705	0.9799
dDocent_Contig_6207	22	0.01281	2732	0.9799
dDocent_Contig_19101	253	0.01282	2690	0.9799
dDocent_Contig_36203	132	0.01283	2726	0.9799
dDocent_Contig_25284	179	0.01292	2708	0.9799
dDocent_Contig_58609	213	0.01295	2663	0.9799
dDocent_Contig_58609	261	0.01295	2663	0.9799
dDocent_Contig_38378	238	0.01301	2651	0.9799
dDocent_Contig_2741	36	0.01308	2636	0.9799
dDocent_Contig_2741	52	0.01308	2636	0.9799
dDocent_Contig_15741	58	0.0131	2633	0.9799
dDocent_Contig_16118	117	0.01313	2627	0.9799
dDocent_Contig_4247	276	0.01319	2615	0.9799
dDocent_Contig_12876	157	0.01321	2648	0.9799
dDocent_Contig_15767	157	0.01323	2645	0.9799
dDocent_Contig_6495	155	0.01323	2645	0.9799
dDocent_Contig_39698	251	0.01326	2600	0.9799
dDocent_Contig_6101	188	0.01326	2639	0.9799
dDocent_Contig_18684	154	0.01334	2585	0.9799
dDocent_Contig_41404	180	0.01339	2612	0.9799
dDocent_Contig_2299	224	0.01339	2576	0.9799
dDocent_Contig_1199	158	0.01345	2564	0.9799
dDocent_Contig_41881	132	0.0135	2591	0.9799
dDocent_Contig_9825	265	0.0135	2555	0.9799
dDocent_Contig_30192	94	0.01351	2552	0.9799
dDocent_Contig_31659	73	0.01355	2546	0.9799
dDocent_Contig_19329	83	0.01377	2504	0.9799
dDocent_Contig_1142	153	0.01391	2480	0.9799
dDocent_Contig_2023	255	0.01396	2507	0.9799
dDocent_Contig_12142	181	0.01399	2465	0.9799
dDocent_Contig_29419	186	0.01407	2486	0.9799
dDocent_Contig_5874	10	0.01407	2486	0.9799
dDocent_Contig_51809	208	0.01414	2474	0.9799
dDocent_Contig_46612	34	0.0142	2429	0.9799
dDocent_Contig_31045	104	0.01429	2414	0.9799
dDocent_Contig_28201	284	0.0143	2447	0.9799
dDocent_Contig_9532	83	0.0143	2447	0.9799
dDocent_Contig_1410	116	0.01432	2408	0.9799
dDocent_Contig_35772	216	0.01436	2402	0.9799
dDocent_Contig_30713	31	0.0144	2429	0.9799
dDocent_Contig_18787	71	0.0144	2429	0.9799
dDocent_Contig_20520	70	0.01441	2393	0.9799
dDocent_Contig_2806	112	0.01441	2393	0.9799
dDocent_Contig_2542	168	0.01443	2390	0.9799
dDocent_Contig_26951	249	0.01443	2390	0.9799
dDocent_Contig_39627	154	0.01448	2381	0.9799
dDocent_Contig_23058	208	0.0145	2378	0.9799
dDocent_Contig_18917	213	0.01454	2372	0.9799
dDocent_Contig_35022	186	0.01458	2366	0.9799
dDocent_Contig_57327	277	0.01464	2390	0.9799
dDocent_Contig_25447	256	0.01466	2387	0.9799
dDocent_Contig_16569	244	0.01471	2345	0.9799
dDocent_Contig_35978	269	0.0148	2330	0.9799
dDocent_Contig_27312	115	0.01488	2318	0.9799
dDocent_Contig_14643	106	0.01492	2345	0.9799
dDocent_Contig_54716	101	0.01492	2312	0.9799
dDocent_Contig_5873	87	0.01494	2408	0.9799
dDocent_Contig_27376	272	0.01494	2342	0.9799
dDocent_Contig_31758	260	0.01497	2303	0.9799
dDocent_Contig_12919	241	0.01498	2336	0.9799
dDocent_Contig_11815	123	0.015	2333	0.9799
dDocent_Contig_23563	200	0.01507	2288	0.9799
dDocent_Contig_40566	16	0.01515	2276	0.9799
dDocent_Contig_7638	165	0.01521	2267	0.9799
dDocent_Contig_8453	248	0.01521	2267	0.9799
dDocent_Contig_2322	197	0.01533	2249	0.9799
dDocent_Contig_34964	199	0.01537	2243	0.9799
dDocent_Contig_3440	118	0.01563	2270	0.9799
dDocent_Contig_16469	141	0.01565	2204	0.9799
dDocent_Contig_5061	122	0.01571	2195	0.9799
dDocent_Contig_47089	184	0.01571	2195	0.9799
dDocent_Contig_19825	245	0.01575	2189	0.9799
dDocent_Contig_38573	154	0.01585	2207	0.9799
dDocent_Contig_2846	36	0.01587	2204	0.9799
dDocent_Contig_21265	224	0.01592	2198	0.9799
dDocent_Contig_23515	271	0.01603	2183	0.9799
dDocent_Contig_10377	49	0.01608	2144	0.9799
dDocent_Contig_21776	176	0.01615	2135	0.9799
dDocent_Contig_14914	214	0.01617	2132	0.9799
dDocent_Contig_4943	174	0.01624	2123	0.9799
dDocent_Contig_24284	278	0.01641	2102	0.9799
dDocent_Contig_203	86	0.01643	2099	0.9799
dDocent_Contig_1199	39	0.01645	2096	0.9799
dDocent_Contig_1633	28	0.01645	2096	0.9799
dDocent_Contig_9181	48	0.01648	2093	0.9799
dDocent_Contig_15498	287	0.0165	2150	0.9799
dDocent_Contig_23083	160	0.01655	2084	0.9799
dDocent_Contig_17662	175	0.01657	2081	0.9799
dDocent_Contig_19238	131	0.01664	2102	0.9799
dDocent_Contig_44299	152	0.01667	2069	0.9799
dDocent_Contig_38644	160	0.01669	2066	0.9799
dDocent_Contig_16095	21	0.01676	2057	0.9799
dDocent_Contig_9351	171	0.01681	2051	0.9799
dDocent_Contig_8470	60	0.01684	2048	0.9799
dDocent_Contig_15282	164	0.01689	2042	0.9799
dDocent_Contig_9973	107	0.01689	2042	0.9799
dDocent_Contig_31322	124	0.01691	2069	0.9799
dDocent_Contig_10166	119	0.01693	2066	0.9799
dDocent_Contig_4807	80	0.01693	2066	0.9799
dDocent_Contig_12339	46	0.01693	2066	0.9799
dDocent_Contig_8789	56	0.01694	2036	0.9799
dDocent_Contig_8632	197	0.01696	2063	0.9799
dDocent_Contig_28765	239	0.01699	2030	0.9799
dDocent_Contig_1953	111	0.01706	2021	0.9799
dDocent_Contig_12268	199	0.01708	2048	0.9799
dDocent_Contig_31188	8	0.01709	2018	0.9799
dDocent_Contig_21875	223	0.01723	2030	0.9799
dDocent_Contig_21875	179	0.01723	2030	0.9799
dDocent_Contig_4117	177	0.01726	2027	0.9799
dDocent_Contig_27770	183	0.01734	2018	0.9799
dDocent_Contig_36602	197	0.01735	1988	0.9799
dDocent_Contig_24245	259	0.0174	1982	0.9799
dDocent_Contig_33611	153	0.01742	1980	0.9799
dDocent_Contig_44932	257	0.01742	1980	0.9799
dDocent_Contig_13834	282	0.01743	1978	0.9799
dDocent_Contig_21598	107	0.01745	1976	0.9799
dDocent_Contig_39744	108	0.01749	1972	0.9799
dDocent_Contig_27885	252	0.01749	1972	0.9799
dDocent_Contig_1124	124	0.0177	1976	0.9799
dDocent_Contig_26380	197	0.01772	1946	0.9799
dDocent_Contig_59066	193	0.01779	1966	0.9799
dDocent_Contig_59066	218	0.01779	1966	0.9799
dDocent_Contig_59066	235	0.01779	1966	0.9799
dDocent_Contig_59066	242	0.01779	1966	0.9799
dDocent_Contig_59066	258	0.01779	1966	0.9799
dDocent_Contig_59066	270	0.01779	1966	0.9799
dDocent_Contig_51106	104	0.01779	1938	0.9799
dDocent_Contig_25594	221	0.01792	1952	0.9799
dDocent_Contig_9170	252	0.01802	1914	0.9799
dDocent_Contig_6127	34	0.01805	1910	0.9799
dDocent_Contig_20333	165	0.01807	1936	0.9799
dDocent_Contig_28383	275	0.01807	1908	0.9799
dDocent_Contig_7685	259	0.01809	1934	0.9799
dDocent_Contig_2922	46	0.01809	1906	0.9799
dDocent_Contig_36682	255	0.01813	1902	0.9799
dDocent_Contig_464	41	0.01813	1930	0.9799
dDocent_Contig_11909	201	0.01816	1926	0.9799
dDocent_Contig_26537	156	0.0182	1922	0.9799
dDocent_Contig_24132	244	0.01824	1890	0.9799
dDocent_Contig_36682	56	0.01826	1888	0.9799
dDocent_Contig_36972	85	0.01828	1886	0.9799
dDocent_Contig_12575	240	0.01828	1886	0.9799
dDocent_Contig_16427	274	0.01837	1904	0.9799
dDocent_Contig_29360	287	0.01837	1904	0.9799
dDocent_Contig_18667	54	0.01842	1872	0.9799
dDocent_Contig_4986	163	0.01843	1898	0.9799
dDocent_Contig_17308	130	0.01846	1868	0.9799
dDocent_Contig_17652	211	0.01846	1868	0.9799
dDocent_Contig_17652	244	0.01846	1868	0.9799
dDocent_Contig_17652	269	0.01846	1868	0.9799
dDocent_Contig_12855	219	0.01847	1894	0.9799
dDocent_Contig_54182	240	0.01852	1862	0.9799
dDocent_Contig_54182	291	0.01852	1862	0.9799
dDocent_Contig_6770	286	0.01854	1860	0.9799
dDocent_Contig_44192	224	0.01856	1858	0.9799
dDocent_Contig_46563	165	0.01856	1858	0.9799
dDocent_Contig_23583	165	0.01857	1884	0.9799
dDocent_Contig_16682	109	0.01858	1856	0.9799
dDocent_Contig_38739	173	0.01866	1848	0.9799
dDocent_Contig_3779	59	0.01872	1842	0.9799
dDocent_Contig_28612	141	0.01872	1842	0.9799
dDocent_Contig_20069	205	0.01881	1860	0.9799
dDocent_Contig_7715	100	0.01887	1854	0.9799
dDocent_Contig_30453	113	0.01893	1848	0.9799
dDocent_Contig_31181	277	0.01895	1846	0.9799
dDocent_Contig_10294	99	0.01901	1814	0.9799
dDocent_Contig_29451	248	0.01909	1806	0.9799
dDocent_Contig_14258	197	0.01912	1830	0.9799
dDocent_Contig_14110	16	0.01913	1802	0.9799
dDocent_Contig_2663	47	0.01916	1800	0.9799
dDocent_Contig_12477	129	0.01924	1818	0.9799
dDocent_Contig_29451	51	0.01928	1814	0.9799
dDocent_Contig_34862	58	0.01931	1786	0.9799
dDocent_Contig_5460	16	0.01933	1784	0.9799
dDocent_Contig_30623	167	0.01935	1782	0.9799
dDocent_Contig_9413	267	0.01972	1774	0.9799
dDocent_Contig_2470	153	0.01979	1742	0.9799
dDocent_Contig_8911	203	0.01982	1740	0.9799
dDocent_Contig_13450	136	0.01985	1762	0.9799
dDocent_Contig_204	237	0.01986	1736	0.9799
dDocent_Contig_17358	69	0.01988	1734	0.9799
dDocent_Contig_17358	75	0.01988	1734	0.9799
dDocent_Contig_54818	177	0.01992	1756	0.9799
dDocent_Contig_13972	71	0.02005	1720	0.9799
dDocent_Contig_28639	244	0.02008	1742	0.9799
dDocent_Contig_3188	291	0.02019	1708	0.9799
dDocent_Contig_24651	58	0.0202	1732	0.9799
dDocent_Contig_21401	210	0.02021	1706	0.9799
dDocent_Contig_21712	116	0.02026	1702	0.9799
dDocent_Contig_21712	197	0.02026	1702	0.9799
dDocent_Contig_20714	179	0.02027	1726	0.9799
dDocent_Contig_32318	155	0.02034	1720	0.9799
dDocent_Contig_6893	265	0.02043	1688	0.9799
dDocent_Contig_28514	255	0.02047	1684	0.9799
dDocent_Contig_36090	232	0.0205	1682	0.9799
dDocent_Contig_3957	165	0.02055	1702	0.9799
dDocent_Contig_1288	33	0.02058	1700	0.9799
dDocent_Contig_19851	154	0.0206	1674	0.9799
dDocent_Contig_3566	119	0.02062	1672	0.9799
dDocent_Contig_5424	133	0.02062	1696	0.9799
dDocent_Contig_34926	93	0.02065	1670	0.9799
dDocent_Contig_44303	184	0.02072	1712	0.9799
dDocent_Contig_22422	29	0.02072	1688	0.9799
dDocent_Contig_13224	171	0.02075	1686	0.9799
dDocent_Contig_21437	157	0.02075	1662	0.9799
dDocent_Contig_208	30	0.0208	1658	0.9799
dDocent_Contig_31978	257	0.02082	1656	0.9799
dDocent_Contig_27116	188	0.02085	1678	0.9799
dDocent_Contig_37934	86	0.02085	1678	0.9799
dDocent_Contig_4271	163	0.02085	1678	0.9799
dDocent_Contig_27392	60	0.02087	1676	0.9799
dDocent_Contig_19482	124	0.02092	1648	0.9799
dDocent_Contig_13422	92	0.02095	1646	0.9799
dDocent_Contig_18735	202	0.02102	1640	0.9799
dDocent_Contig_4634	25	0.02105	1662	0.9799
dDocent_Contig_24270	232	0.0211	1658	0.9799
dDocent_Contig_20878	137	0.02122	1648	0.9799
dDocent_Contig_14050	261	0.02134	1616	0.9799
dDocent_Contig_44335	44	0.02143	1632	0.9799
dDocent_Contig_25378	270	0.02147	1606	0.9799
dDocent_Contig_21004	161	0.02177	1584	0.9799
dDocent_Contig_17334	168	0.02181	1604	0.9799
dDocent_Contig_239	136	0.02185	1578	0.9799
dDocent_Contig_29080	167	0.02188	1576	0.9799
dDocent_Contig_12794	45	0.0219	1574	0.9799
dDocent_Contig_9984	25	0.02193	1572	0.9799
dDocent_Contig_17184	20	0.02202	1566	0.9799
dDocent_Contig_7679	235	0.02203	1588	0.9799
dDocent_Contig_7679	62	0.02203	1588	0.9799
dDocent_Contig_9510	41	0.02205	1586	0.9799
dDocent_Contig_17662	233	0.02207	1562	0.9799
dDocent_Contig_18258	60	0.02207	1562	0.9799
dDocent_Contig_12000	60	0.02209	1538	0.9799
dDocent_Contig_14630	201	0.02213	1558	0.9799
dDocent_Contig_6279	189	0.02217	1578	0.9799
dDocent_Contig_34862	93	0.02219	1554	0.9799
dDocent_Contig_28049	236	0.02222	1552	0.9799
dDocent_Contig_34523	124	0.02227	1526	0.9799
dDocent_Contig_9245	251	0.02227	1548	0.9799
dDocent_Contig_9245	52	0.02227	1548	0.9799
dDocent_Contig_29356	80	0.02227	1526	0.9799
dDocent_Contig_20796	233	0.0223	1546	0.9799
dDocent_Contig_2072	238	0.02236	1542	0.9799
dDocent_Contig_6909	227	0.02238	1518	0.9799
dDocent_Contig_4874	278	0.02245	1536	0.9799
dDocent_Contig_16017	191	0.0225	1510	0.9799
dDocent_Contig_20842	10	0.02259	1504	0.9799
dDocent_Contig_1076	90	0.02262	1524	0.9799
dDocent_Contig_1456	123	0.02268	1520	0.9799
dDocent_Contig_21586	7	0.02268	1520	0.9799
dDocent_Contig_18449	118	0.02271	1518	0.9799
dDocent_Contig_52149	78	0.02277	1492	0.9799
dDocent_Contig_12686	139	0.02277	1492	0.9799
dDocent_Contig_445	245	0.0228	1512	0.9799
dDocent_Contig_42020	24	0.02286	1486	0.9799
dDocent_Contig_11078	19	0.02293	1482	0.9799
dDocent_Contig_17518	10	0.02299	1478	0.9799
dDocent_Contig_2552	268	0.02302	1476	0.9799
dDocent_Contig_20015	94	0.02308	1494	0.9799
dDocent_Contig_23019	25	0.02308	1472	0.9799
dDocent_Contig_37139	214	0.02314	1468	0.9799
dDocent_Contig_34998	268	0.02323	1484	0.9799
dDocent_Contig_45629	9	0.02326	1482	0.9799
dDocent_Contig_16	114	0.02333	1478	0.9799
dDocent_Contig_11206	108	0.02341	1494	0.9799
dDocent_Contig_38973	91	0.02345	1470	0.9799
dDocent_Contig_10242	160	0.02345	1470	0.9799
dDocent_Contig_31490	69	0.02349	1468	0.9799
dDocent_Contig_1324	164	0.02356	1442	0.9799
dDocent_Contig_22561	245	0.02368	1456	0.9799
dDocent_Contig_19616	218	0.02373	1432	0.9799
dDocent_Contig_17140	181	0.02374	1452	0.9799
dDocent_Contig_17115	213	0.02376	1430	0.9799
dDocent_Contig_4583	179	0.02376	1430	0.9799
dDocent_Contig_42728	14	0.02381	1448	0.9799
dDocent_Contig_9204	219	0.02384	1446	0.9799
dDocent_Contig_14327	113	0.02386	1466	0.9799
dDocent_Contig_45859	223	0.02389	1422	0.9799
dDocent_Contig_37278	254	0.02391	1442	0.9799
dDocent_Contig_21205	43	0.02396	1418	0.9799
dDocent_Contig_14466	112	0.02399	1416	0.9799
dDocent_Contig_42956	237	0.02404	1434	0.9799
dDocent_Contig_11242	139	0.02408	1432	0.9799
dDocent_Contig_2625	190	0.02408	1432	0.9799
dDocent_Contig_35979	45	0.0241	1410	0.9799
dDocent_Contig_13522	115	0.0241	1410	0.9799
dDocent_Contig_768	240	0.02411	1430	0.9799
dDocent_Contig_16992	273	0.02416	1406	0.9799
dDocent_Contig_44451	51	0.02423	1402	0.9799
dDocent_Contig_2642	95	0.0243	1398	0.9799
dDocent_Contig_10948	225	0.0243	1398	0.9799
dDocent_Contig_9144	24	0.02437	1394	0.9799
dDocent_Contig_11579	219	0.02438	1414	0.9799
dDocent_Contig_4442	185	0.02441	1392	0.9799
dDocent_Contig_38238	210	0.02451	1386	0.9799
dDocent_Contig_38238	230	0.02451	1386	0.9799
dDocent_Contig_12308	97	0.02451	1386	0.9799
dDocent_Contig_6042	205	0.02462	1380	0.9799
dDocent_Contig_23316	85	0.02469	1376	0.9799
dDocent_Contig_5942	183	0.02473	1374	0.9799
dDocent_Contig_12163	152	0.0248	1390	0.9799
dDocent_Contig_29099	177	0.0248	1390	0.9799
dDocent_Contig_51223	183	0.02491	1364	0.9799
dDocent_Contig_51223	25	0.02491	1364	0.9799
dDocent_Contig_15684	257	0.02491	1364	0.9799
dDocent_Contig_34523	119	0.02498	1380	0.9799
dDocent_Contig_38346	137	0.02506	1356	0.9799
dDocent_Contig_24352	210	0.02506	1356	0.9799
dDocent_Contig_7466	93	0.02513	1352	0.9799
dDocent_Contig_11264	29	0.02517	1350	0.9799
dDocent_Contig_28882	107	0.02527	1364	0.9799
dDocent_Contig_20361	129	0.02528	1344	0.9799
dDocent_Contig_15921	152	0.02535	1340	0.9799
dDocent_Contig_13216	192	0.02542	1356	0.9799
dDocent_Contig_21463	54	0.02543	1336	0.9799
dDocent_Contig_2072	130	0.02543	1336	0.9799
dDocent_Contig_41881	208	0.02547	1334	0.9799
dDocent_Contig_8708	270	0.0255	1352	0.9799
dDocent_Contig_3779	123	0.02554	1330	0.9799
dDocent_Contig_25004	113	0.02554	1330	0.9799
dDocent_Contig_51615	207	0.02554	1330	0.9799
dDocent_Contig_10006	77	0.02562	1326	0.9799
dDocent_Contig_17234	281	0.02566	1324	0.9799
dDocent_Contig_56943	254	0.0257	1322	0.9799
dDocent_Contig_9462	42	0.02573	1340	0.9799
dDocent_Contig_1175	242	0.0258	1336	0.9799
dDocent_Contig_1175	250	0.0258	1336	0.9799
dDocent_Contig_12372	180	0.02589	1312	0.9799
dDocent_Contig_20107	175	0.026	1326	0.9799
dDocent_Contig_23900	104	0.02609	1302	0.9799
dDocent_Contig_23900	66	0.02609	1302	0.9799
dDocent_Contig_46191	219	0.02609	1302	0.9799
dDocent_Contig_15584	252	0.02612	1320	0.9799
dDocent_Contig_28967	241	0.02612	1320	0.9799
dDocent_Contig_3513	50	0.02621	1296	0.9799
dDocent_Contig_18329	248	0.0263	1292	0.9799
dDocent_Contig_49156	270	0.02634	1290	0.9799
dDocent_Contig_23312	273	0.02636	1308	0.9799
dDocent_Contig_10392	86	0.0265	1282	0.9799
dDocent_Contig_1833	163	0.0265	1282	0.9799
dDocent_Contig_38709	27	0.0265	1282	0.9799
dDocent_Contig_3847	220	0.02662	1276	0.9799
dDocent_Contig_12038	106	0.02664	1294	0.9799
dDocent_Contig_15474	50	0.02676	1288	0.9799
dDocent_Contig_5632	31	0.02679	1268	0.9799
dDocent_Contig_30658	73	0.02681	1286	0.9799
dDocent_Contig_7867	112	0.02688	1264	0.9799
dDocent_Contig_11263	268	0.02689	1282	0.9799
dDocent_Contig_1064	64	0.02696	1260	0.9799
dDocent_Contig_5867	200	0.02697	1278	0.9799
dDocent_Contig_7450	48	0.02705	1256	0.9799
dDocent_Contig_21042	182	0.02706	1274	0.9799
dDocent_Contig_41385	193	0.02723	1266	0.9799
dDocent_Contig_41385	215	0.02723	1266	0.9799
dDocent_Contig_8248	124	0.02731	1244	0.9799
dDocent_Contig_21709	251	0.02732	1262	0.9799
dDocent_Contig_2783	259	0.0274	1258	0.9799
dDocent_Contig_15327	113	0.02744	1238	0.9799
dDocent_Contig_22891	114	0.02749	1236	0.9799
dDocent_Contig_35407	61	0.02762	1230	0.9799
dDocent_Contig_946	139	0.02776	1224	0.9799
dDocent_Contig_21370	180	0.02776	1224	0.9799
dDocent_Contig_38890	161	0.02776	1224	0.9799
dDocent_Contig_38890	168	0.02776	1224	0.9799
dDocent_Contig_26026	175	0.0278	1222	0.9799
dDocent_Contig_26046	201	0.0278	1222	0.9799
dDocent_Contig_19271	158	0.0278	1222	0.9799
dDocent_Contig_22186	18	0.0278	1240	0.9799
dDocent_Contig_21993	219	0.02794	1234	0.9799
dDocent_Contig_36655	28	0.02798	1214	0.9799
dDocent_Contig_14975	120	0.02803	1212	0.9799
dDocent_Contig_37933	43	0.02808	1210	0.9799
dDocent_Contig_17438	42	0.02812	1208	0.9799
dDocent_Contig_25975	198	0.02812	1226	0.9799
dDocent_Contig_28397	230	0.02812	1208	0.9799
dDocent_Contig_21115	127	0.02812	1208	0.9799
dDocent_Contig_6832	184	0.02817	1206	0.9799
dDocent_Contig_27840	28	0.02822	1204	0.9799
dDocent_Contig_47647	190	0.02822	1204	0.9799
dDocent_Contig_19703	84	0.02831	1200	0.9799
dDocent_Contig_45894	105	0.02836	1198	0.9799
dDocent_Contig_26921	236	0.0284	1196	0.9799
dDocent_Contig_11457	16	0.02842	1248	0.9799
dDocent_Contig_12594	284	0.02845	1194	0.9799
dDocent_Contig_50379	103	0.02849	1210	0.9799
dDocent_Contig_35025	120	0.0285	1192	0.9799
dDocent_Contig_51118	241	0.02864	1186	0.9799
dDocent_Contig_2290	68	0.02868	1202	0.9799
dDocent_Contig_22908	166	0.02868	1202	0.9799
dDocent_Contig_5347	244	0.02869	1184	0.9799
dDocent_Contig_18695	248	0.02879	1180	0.9799
dDocent_Contig_5418	111	0.02882	1196	0.9799
dDocent_Contig_27116	70	0.02884	1178	0.9799
dDocent_Contig_2006	30	0.02887	1194	0.9799
dDocent_Contig_20034	120	0.02894	1174	0.9799
dDocent_Contig_20034	178	0.02894	1174	0.9799
dDocent_Contig_23476	278	0.02899	1172	0.9799
dDocent_Contig_43862	215	0.02899	1172	0.9799
dDocent_Contig_38690	221	0.02899	1172	0.9799
dDocent_Contig_3262	219	0.02904	1170	0.9799
dDocent_Contig_38152	86	0.02904	1170	0.9799
dDocent_Contig_10798	54	0.02904	1170	0.9799
dDocent_Contig_15	19	0.02908	1168	0.9799
dDocent_Contig_15	27	0.02908	1168	0.9799
dDocent_Contig_33617	295	0.02913	1166	0.9799
dDocent_Contig_4716	272	0.02913	1166	0.9799
dDocent_Contig_19185	47	0.02918	1164	0.9799
dDocent_Contig_27431	209	0.02921	1180	0.9799
dDocent_Contig_5189	201	0.02921	1180	0.9799
dDocent_Contig_25162	121	0.02923	1162	0.9799
dDocent_Contig_9462	216	0.02924	1196	0.9799
dDocent_Contig_21202	86	0.02929	1160	0.9799
dDocent_Contig_30201	200	0.02931	1176	0.9799
dDocent_Contig_18610	201	0.02939	1156	0.9799
dDocent_Contig_4574	47	0.02939	1156	0.9799
dDocent_Contig_33527	169	0.02944	1154	0.9799
dDocent_Contig_6698	285	0.02946	1170	0.9799
dDocent_Contig_37957	152	0.02954	1150	0.9799
dDocent_Contig_37957	160	0.02954	1150	0.9799
dDocent_Contig_11170	84	0.02977	1158	0.9799
dDocent_Contig_25768	244	0.02985	1138	0.9799
dDocent_Contig_5388	194	0.02985	1138	0.9799
dDocent_Contig_19174	209	0.02987	1154	0.9799
dDocent_Contig_30508	16	0.0299	1136	0.9799
dDocent_Contig_8577	285	0.02992	1152	0.9799
dDocent_Contig_52847	173	0.02992	1152	0.9799
dDocent_Contig_246	152	0.02996	1134	0.9799
dDocent_Contig_21899	126	0.02996	1134	0.9799
dDocent_Contig_6320	242	0.03001	1132	0.9799
dDocent_Contig_8030	55	0.03001	1132	0.9799
dDocent_Contig_10550	107	0.03006	1130	0.9799
dDocent_Contig_14693	166	0.03006	1130	0.9799
dDocent_Contig_377	55	0.03012	1128	0.9799
dDocent_Contig_29602	162	0.03017	1126	0.9799
dDocent_Contig_1193	64	0.03017	1126	0.9799
dDocent_Contig_31220	77	0.03028	1122	0.9799
dDocent_Contig_492	103	0.03028	1122	0.9799
dDocent_Contig_49285	231	0.03033	1120	0.9799
dDocent_Contig_12350	266	0.03033	1120	0.9799
dDocent_Contig_16935	60	0.03038	1118	0.9799
dDocent_Contig_41601	176	0.03038	1118	0.9799
dDocent_Contig_24138	168	0.03044	1116	0.9799
dDocent_Contig_9110	22	0.03044	1116	0.9799
dDocent_Contig_8470	11	0.0305	1130	0.9799
dDocent_Contig_3714	35	0.0306	1110	0.9799
dDocent_Contig_35753	124	0.03066	1108	0.9799
dDocent_Contig_33316	60	0.03071	1106	0.9799
dDocent_Contig_7929	115	0.03077	1104	0.9799
dDocent_Contig_8108	37	0.03078	1120	0.9799
dDocent_Contig_15778	276	0.03078	1120	0.9799
dDocent_Contig_28244	202	0.03083	1118	0.9799
dDocent_Contig_33333	158	0.03094	1098	0.9799
dDocent_Contig_7986	12	0.03105	1094	0.9799
dDocent_Contig_16189	86	0.03111	1092	0.9799
dDocent_Contig_14165	14	0.03116	1090	0.9799
dDocent_Contig_14305	118	0.03122	1088	0.9799
dDocent_Contig_47095	8	0.03128	1086	0.9799
dDocent_Contig_15324	238	0.03134	1100	0.9799
dDocent_Contig_46704	109	0.03134	1084	0.9799
dDocent_Contig_3304	50	0.03151	1078	0.9799
dDocent_Contig_21855	51	0.03151	1078	0.9799
dDocent_Contig_6432	80	0.03156	1092	0.9799
dDocent_Contig_47132	24	0.03163	1074	0.9799
dDocent_Contig_53543	41	0.03174	1086	0.9799
dDocent_Contig_33162	44	0.03175	1070	0.9799
dDocent_Contig_5867	40	0.03175	1070	0.9799
dDocent_Contig_7958	122	0.03181	1068	0.9799
dDocent_Contig_24287	122	0.03181	1068	0.9799
dDocent_Contig_13203	277	0.03187	1066	0.9799
dDocent_Contig_1781	177	0.03187	1066	0.9799
dDocent_Contig_21072	276	0.03191	1096	0.9799
dDocent_Contig_8164	173	0.03191	1080	0.9799
dDocent_Contig_8164	204	0.03191	1080	0.9799
dDocent_Contig_8164	256	0.03191	1080	0.9799
dDocent_Contig_8164	271	0.03191	1080	0.9799
dDocent_Contig_8164	281	0.03191	1080	0.9799
dDocent_Contig_8164	52	0.03191	1080	0.9799
dDocent_Contig_1137	68	0.03205	1060	0.9799
dDocent_Contig_35563	216	0.03223	1054	0.9799
dDocent_Contig_208	283	0.03223	1054	0.9799
dDocent_Contig_20971	273	0.03233	1066	0.9799
dDocent_Contig_46911	205	0.03233	1066	0.9799
dDocent_Contig_2048	222	0.03235	1050	0.9799
dDocent_Contig_5474	289	0.03241	1048	0.9799
dDocent_Contig_4095	198	0.03254	1044	0.9799
dDocent_Contig_8944	54	0.03254	1044	0.9799
dDocent_Contig_4764	108	0.03258	1058	0.9799
dDocent_Contig_3084	90	0.03258	1058	0.9799
dDocent_Contig_9381	190	0.0326	1042	0.9799
dDocent_Contig_37880	135	0.03264	1056	0.9799
dDocent_Contig_40265	194	0.03266	1040	0.9799
dDocent_Contig_30202	249	0.0327	1054	0.9799
dDocent_Contig_34763	219	0.03272	1038	0.9799
dDocent_Contig_11076	15	0.03279	1036	0.9799
dDocent_Contig_6919	105	0.03279	1036	0.9799
dDocent_Contig_13908	136	0.03279	1036	0.9799
dDocent_Contig_29096	77	0.03283	1050	0.9799
dDocent_Contig_9022	135	0.03283	1050	0.9799
dDocent_Contig_30453	242	0.03285	1034	0.9799
dDocent_Contig_15930	284	0.03285	1034	0.9799
dDocent_Contig_31646	29	0.03285	1034	0.9799
dDocent_Contig_5193	127	0.03298	1030	0.9799
dDocent_Contig_20743	82	0.03301	1044	0.9799
dDocent_Contig_17543	55	0.03304	1028	0.9799
dDocent_Contig_52452	193	0.03304	1028	0.9799
dDocent_Contig_17903	86	0.03304	1028	0.9799
dDocent_Contig_12876	209	0.03311	1026	0.9799
dDocent_Contig_12876	254	0.03311	1026	0.9799
dDocent_Contig_50379	88	0.03314	1040	0.9799
dDocent_Contig_2167	156	0.03314	1040	0.9799
dDocent_Contig_7688	223	0.03324	1022	0.9799
dDocent_Contig_8433	66	0.03324	1022	0.9799
dDocent_Contig_6726	153	0.03327	1036	0.9799
dDocent_Contig_33976	220	0.03333	1034	0.9799
dDocent_Contig_33976	247	0.03333	1034	0.9799
dDocent_Contig_37235	257	0.03337	1018	0.9799
dDocent_Contig_23200	82	0.03337	1018	0.9799
dDocent_Contig_28075	76	0.03337	1018	0.9799
dDocent_Contig_22044	134	0.03343	1016	0.9799
dDocent_Contig_10315	280	0.0335	1014	0.9799
dDocent_Contig_21576	180	0.03356	1012	0.9799
dDocent_Contig_9561	121	0.03359	1026	0.9799
dDocent_Contig_4127	102	0.03359	1026	0.9799
dDocent_Contig_9510	214	0.0337	1008	0.9799
dDocent_Contig_49435	138	0.03376	1006	0.9799
dDocent_Contig_2006	58	0.03376	1006	0.9799
dDocent_Contig_52630	43	0.03383	1004	0.9799
dDocent_Contig_5645	249	0.03383	1004	0.9799
dDocent_Contig_34560	154	0.03386	1018	0.9799
dDocent_Contig_19033	280	0.0339	1002	0.9799
dDocent_Contig_15090	131	0.03397	1000	0.9799
dDocent_Contig_11830	180	0.03399	1014	0.9799
dDocent_Contig_21484	86	0.03399	1014	0.9799
dDocent_Contig_21484	95	0.03399	1014	0.9799
dDocent_Contig_40003	257	0.034	999	0.9799
dDocent_Contig_28969	55	0.034	999	0.9799
dDocent_Contig_22771	166	0.0341	996	0.9799
dDocent_Contig_25388	250	0.03419	1008	0.9799
dDocent_Contig_24434	47	0.0344	1002	0.9799
dDocent_Contig_12034	101	0.03445	986	0.9799
dDocent_Contig_3665	258	0.03445	986	0.9799
dDocent_Contig_27568	183	0.0346	996	0.9799
dDocent_Contig_16485	232	0.0346	996	0.9799
dDocent_Contig_19873	89	0.03462	981	0.9799
dDocent_Contig_6751	190	0.03466	980	0.9799
dDocent_Contig_34887	82	0.03474	992	0.9799
dDocent_Contig_21999	268	0.03476	977	0.9799
dDocent_Contig_1879	28	0.03476	977	0.9799
dDocent_Contig_18717	109	0.03484	975	0.9799
dDocent_Contig_15085	50	0.03485	989	0.9799
dDocent_Contig_43951	84	0.03498	971	0.9799
dDocent_Contig_31430	267	0.03498	1014	0.9799
dDocent_Contig_20794	173	0.03498	971	0.9799
dDocent_Contig_8561	163	0.03505	969	0.9799
dDocent_Contig_27668	275	0.03505	969	0.9799
dDocent_Contig_15767	168	0.03509	968	0.9799
dDocent_Contig_25848	94	0.03512	967	0.9799
dDocent_Contig_30255	245	0.03512	967	0.9799
dDocent_Contig_2943	241	0.03516	966	0.9799
dDocent_Contig_26800	139	0.0352	979	0.9799
dDocent_Contig_26572	36	0.03523	964	0.9799
dDocent_Contig_31920	127	0.03523	964	0.9799
dDocent_Contig_36063	276	0.03523	964	0.9799
dDocent_Contig_2744	81	0.03531	976	0.9799
dDocent_Contig_1789	261	0.03545	958	0.9799
dDocent_Contig_8771	286	0.03546	972	0.9799
dDocent_Contig_47335	137	0.03549	971	0.9799
dDocent_Contig_14545	272	0.03564	953	0.9799
dDocent_Contig_1874	105	0.03564	953	0.9799
dDocent_Contig_30845	219	0.03564	967	0.9799
dDocent_Contig_7273	131	0.03579	949	0.9799
dDocent_Contig_25792	192	0.03594	945	0.9799
dDocent_Contig_7564	267	0.03606	942	0.9799
dDocent_Contig_8042	21	0.03629	936	0.9799
dDocent_Contig_59218	66	0.03635	948	0.9799
dDocent_Contig_21034	38	0.03636	934	0.9799
dDocent_Contig_33090	32	0.03644	932	0.9799
dDocent_Contig_22926	286	0.03644	932	0.9799
dDocent_Contig_54348	187	0.03652	930	0.9799
dDocent_Contig_45235	184	0.03659	942	0.9799
dDocent_Contig_30713	51	0.03659	942	0.9799
dDocent_Contig_30912	23	0.03664	927	0.9799
dDocent_Contig_59548	75	0.03666	940	0.9799
dDocent_Contig_16536	170	0.03668	926	0.9799
dDocent_Contig_18967	132	0.03674	938	0.9799
dDocent_Contig_4893	137	0.03681	909	0.9799
dDocent_Contig_3112	141	0.03685	908	0.9799
dDocent_Contig_16118	153	0.03685	908	0.9799
dDocent_Contig_19421	280	0.03689	907	0.9799
dDocent_Contig_1008	164	0.03689	907	0.9799
dDocent_Contig_17102	103	0.03692	920	0.9799
dDocent_Contig_44409	165	0.03698	905	0.9799
dDocent_Contig_32002	224	0.03698	905	0.9799
dDocent_Contig_26603	79	0.03706	903	0.9799
dDocent_Contig_3121	118	0.0371	902	0.9799
dDocent_Contig_27627	28	0.0371	929	0.9799
dDocent_Contig_16661	57	0.03722	899	0.9799
dDocent_Contig_7359	26	0.03726	925	0.9799
dDocent_Contig_9013	56	0.03728	911	0.9799
dDocent_Contig_5350	212	0.0373	924	0.9799
dDocent_Contig_12625	159	0.03735	896	0.9799
dDocent_Contig_20158	17	0.03735	896	0.9799
dDocent_Contig_41159	115	0.03739	895	0.9799
dDocent_Contig_38008	74	0.03749	906	0.9799
dDocent_Contig_35641	11	0.03753	905	0.9799
dDocent_Contig_41935	11	0.03753	905	0.9799
dDocent_Contig_8224	233	0.03753	905	0.9799
dDocent_Contig_53644	243	0.0376	890	0.9799
dDocent_Contig_8236	256	0.0376	890	0.9799
dDocent_Contig_14151	24	0.03761	903	0.9799
dDocent_Contig_10398	56	0.03769	901	0.9799
dDocent_Contig_35449	175	0.03769	901	0.9799
dDocent_Contig_14732	184	0.03782	898	0.9799
dDocent_Contig_28502	249	0.03782	898	0.9799
dDocent_Contig_22514	18	0.03786	897	0.9799
dDocent_Contig_37364	208	0.0379	896	0.9799
dDocent_Contig_27470	37	0.03794	882	0.9799
dDocent_Contig_11190	175	0.03798	881	0.9799
dDocent_Contig_11190	211	0.03798	881	0.9799
dDocent_Contig_11190	225	0.03798	881	0.9799
dDocent_Contig_11190	52	0.03798	881	0.9799
dDocent_Contig_21587	265	0.03807	879	0.9799
dDocent_Contig_20755	74	0.03807	879	0.9799
dDocent_Contig_5814	78	0.03811	878	0.9799
dDocent_Contig_27018	153	0.03815	877	0.9799
dDocent_Contig_4110	50	0.03815	877	0.9799
dDocent_Contig_16716	119	0.0382	876	0.9799
dDocent_Contig_5418	25	0.03837	872	0.9799
dDocent_Contig_21379	131	0.03846	883	0.9799
dDocent_Contig_10597	227	0.03846	870	0.9799
dDocent_Contig_6882	208	0.03846	883	0.9799
dDocent_Contig_13153	230	0.03859	867	0.9799
dDocent_Contig_13633	105	0.03872	877	0.9799
dDocent_Contig_19996	250	0.03873	864	0.9799
dDocent_Contig_24283	107	0.03882	862	0.9799
dDocent_Contig_30570	70	0.03886	861	0.9799
dDocent_Contig_7238	269	0.0389	873	0.9799
dDocent_Contig_17904	19	0.03895	872	0.9799
dDocent_Contig_17043	181	0.03904	870	0.9799
dDocent_Contig_13603	124	0.03918	854	0.9799
dDocent_Contig_9854	9	0.03926	865	0.9799
dDocent_Contig_19402	119	0.03931	864	0.9799
dDocent_Contig_20483	192	0.03932	851	0.9799
dDocent_Contig_11837	169	0.03932	851	0.9799
dDocent_Contig_14734	102	0.03932	851	0.9799
dDocent_Contig_15776	194	0.03935	863	0.9799
dDocent_Contig_25559	87	0.03937	850	0.9799
dDocent_Contig_18270	128	0.03937	850	0.9799
dDocent_Contig_19436	15	0.03946	848	0.9799
dDocent_Contig_11909	120	0.03946	848	0.9799
dDocent_Contig_18005	228	0.03955	846	0.9799
dDocent_Contig_30077	47	0.03955	846	0.9799
dDocent_Contig_3616	118	0.03955	846	0.9799
dDocent_Contig_46444	208	0.03955	846	0.9799
dDocent_Contig_25019	278	0.03964	844	0.9799
dDocent_Contig_51310	105	0.03967	856	0.9799
dDocent_Contig_4246	138	0.03967	856	0.9799
dDocent_Contig_43290	171	0.03974	842	0.9799
dDocent_Contig_4189	159	0.03986	852	0.9799
dDocent_Contig_1496	254	0.03988	839	0.9799
dDocent_Contig_33394	249	0.03991	851	0.9799
dDocent_Contig_12357	43	0.04	849	0.9799
dDocent_Contig_12533	203	0.04009	847	0.9799
dDocent_Contig_17518	206	0.04017	833	0.9799
dDocent_Contig_43476	8	0.04026	831	0.9799
dDocent_Contig_30338	183	0.04043	840	0.9799
dDocent_Contig_31491	250	0.04043	840	0.9799
dDocent_Contig_21551	255	0.04048	839	0.9799
dDocent_Contig_17950	176	0.04052	838	0.9799
dDocent_Contig_16477	189	0.04056	825	0.9799
dDocent_Contig_3044	100	0.0407	822	0.9799
dDocent_Contig_12572	99	0.04072	834	0.9799
dDocent_Contig_56035	51	0.04077	833	0.9799
dDocent_Contig_1886	47	0.0408	820	0.9799
dDocent_Contig_21875	188	0.0408	820	0.9799
dDocent_Contig_21875	209	0.0408	820	0.9799
dDocent_Contig_21875	232	0.0408	820	0.9799
dDocent_Contig_21875	248	0.0408	820	0.9799
dDocent_Contig_21875	278	0.0408	820	0.9799
dDocent_Contig_3231	165	0.0409	818	0.9799
dDocent_Contig_30629	51	0.0409	818	0.9799
dDocent_Contig_17209	272	0.04091	830	0.9799
dDocent_Contig_33738	206	0.04095	817	0.9799
dDocent_Contig_43007	170	0.04095	817	0.9799
dDocent_Contig_43101	49	0.04096	829	0.9799
dDocent_Contig_16777	263	0.0411	814	0.9799
dDocent_Contig_21072	178	0.04115	813	0.9799
dDocent_Contig_36987	247	0.04115	813	0.9799
dDocent_Contig_25594	88	0.04126	811	0.9799
dDocent_Contig_22253	93	0.04126	823	0.9799
dDocent_Contig_49965	159	0.04126	823	0.9799
dDocent_Contig_16329	73	0.04131	822	0.9799
dDocent_Contig_18434	222	0.04136	809	0.9799
dDocent_Contig_18884	71	0.04136	821	0.9799
dDocent_Contig_1633	94	0.04136	809	0.9799
dDocent_Contig_30273	276	0.04141	820	0.9799
dDocent_Contig_26969	47	0.04141	820	0.9799
dDocent_Contig_33252	53	0.04146	807	0.9799
dDocent_Contig_4788	138	0.04151	806	0.9799
dDocent_Contig_239	128	0.04151	806	0.9799
dDocent_Contig_6229	169	0.04151	818	0.9799
dDocent_Contig_49663	12	0.04156	805	0.9799
dDocent_Contig_23358	96	0.04156	805	0.9799
dDocent_Contig_2865	222	0.04161	804	0.9799
dDocent_Contig_2667	235	0.04167	815	0.9799
dDocent_Contig_39460	212	0.04167	803	0.9799
dDocent_Contig_28639	249	0.04172	814	0.9799
dDocent_Contig_22011	205	0.04172	802	0.9799
dDocent_Contig_25388	27	0.04177	813	0.9799
dDocent_Contig_2741	106	0.04177	813	0.9799
dDocent_Contig_29688	231	0.04192	810	0.9799
dDocent_Contig_6239	114	0.04193	798	0.9799
dDocent_Contig_10165	107	0.04198	809	0.9799
dDocent_Contig_9992	115	0.04198	797	0.9799
dDocent_Contig_2159	211	0.04198	809	0.9799
dDocent_Contig_6648	70	0.04203	796	0.9799
dDocent_Contig_6648	82	0.04203	796	0.9799
dDocent_Contig_12879	171	0.04203	796	0.9799
dDocent_Contig_4542	22	0.04229	803	0.9799
dDocent_Contig_29604	251	0.04234	802	0.9799
dDocent_Contig_3863	132	0.04241	789	0.9799
dDocent_Contig_32663	283	0.04241	789	0.9799
dDocent_Contig_9790	159	0.04246	788	0.9799
dDocent_Contig_1192	165	0.04246	788	0.9799
dDocent_Contig_10847	25	0.04257	786	0.9799
dDocent_Contig_20529	157	0.04261	797	0.9799
dDocent_Contig_6968	255	0.04262	785	0.9799
dDocent_Contig_1538	140	0.04268	784	0.9799
dDocent_Contig_1538	249	0.04268	784	0.9799
dDocent_Contig_29256	13	0.04268	784	0.9799
dDocent_Contig_22186	33	0.04273	783	0.9799
dDocent_Contig_22186	89	0.04273	783	0.9799
dDocent_Contig_17782	57	0.04278	782	0.9799
dDocent_Contig_54182	116	0.04278	782	0.9799
dDocent_Contig_54182	18	0.04278	782	0.9799
dDocent_Contig_54182	29	0.04278	782	0.9799
dDocent_Contig_54182	39	0.04278	782	0.9799
dDocent_Contig_54182	67	0.04278	782	0.9799
dDocent_Contig_54182	8	0.04278	782	0.9799
dDocent_Contig_54182	84	0.04278	782	0.9799
dDocent_Contig_54182	95	0.04278	782	0.9799
dDocent_Contig_11451	41	0.04282	793	0.9799
dDocent_Contig_40879	228	0.04284	781	0.9799
dDocent_Contig_37355	14	0.04284	781	0.9799
dDocent_Contig_13868	61	0.04288	792	0.9799
dDocent_Contig_13868	70	0.04288	792	0.9799
dDocent_Contig_48312	25	0.04289	780	0.9799
dDocent_Contig_18895	250	0.04293	791	0.9799
dDocent_Contig_17478	34	0.04293	791	0.9799
dDocent_Contig_51780	257	0.04295	779	0.9799
dDocent_Contig_45965	52	0.04295	779	0.9799
dDocent_Contig_10377	196	0.043	778	0.9799
dDocent_Contig_17790	182	0.04304	789	0.9799
dDocent_Contig_39735	129	0.04309	788	0.9799
dDocent_Contig_42275	83	0.04309	788	0.9799
dDocent_Contig_17344	250	0.04326	785	0.9799
dDocent_Contig_47528	76	0.04328	773	0.9799
dDocent_Contig_10352	229	0.04328	773	0.9799
dDocent_Contig_7118	277	0.04334	772	0.9799
dDocent_Contig_34730	195	0.04337	783	0.9799
dDocent_Contig_9228	226	0.04337	783	0.9799
dDocent_Contig_13802	31	0.04339	771	0.9799
dDocent_Contig_14723	233	0.04342	782	0.9799
dDocent_Contig_31138	287	0.04351	769	0.9799
dDocent_Contig_1887	65	0.04351	769	0.9799
dDocent_Contig_416	197	0.04353	780	0.9799
dDocent_Contig_36524	248	0.04359	779	0.9799
dDocent_Contig_6362	86	0.04362	767	0.9799
dDocent_Contig_49707	281	0.0437	777	0.9799
dDocent_Contig_15404	203	0.0437	777	0.9799
dDocent_Contig_24011	124	0.04373	765	0.9799
dDocent_Contig_4708	185	0.04391	762	0.9799
dDocent_Contig_52470	118	0.04391	762	0.9799
dDocent_Contig_24405	220	0.04393	773	0.9799
dDocent_Contig_15280	186	0.04396	761	0.9799
dDocent_Contig_16229	239	0.04396	761	0.9799
dDocent_Contig_19493	169	0.04402	760	0.9799
dDocent_Contig_31977	188	0.04408	759	0.9799
dDocent_Contig_31045	68	0.0441	770	0.9799
dDocent_Contig_32196	213	0.04416	769	0.9799
dDocent_Contig_14575	176	0.0442	757	0.9799
dDocent_Contig_18448	76	0.0442	757	0.9799
dDocent_Contig_847	226	0.04421	768	0.9799
dDocent_Contig_29186	18	0.04425	756	0.9799
dDocent_Contig_44397	121	0.04427	767	0.9799
dDocent_Contig_12260	12	0.04431	755	0.9799
dDocent_Contig_52363	180	0.04437	754	0.9799
dDocent_Contig_48004	205	0.04439	765	0.9799
dDocent_Contig_14814	69	0.04443	753	0.9799
dDocent_Contig_14945	75	0.04455	751	0.9799
dDocent_Contig_18070	178	0.04455	751	0.9799
dDocent_Contig_34730	172	0.04455	751	0.9799
dDocent_Contig_29152	153	0.04462	761	0.9799
dDocent_Contig_30236	97	0.04467	749	0.9799
dDocent_Contig_27876	256	0.04467	749	0.9799
dDocent_Contig_3085	222	0.04473	748	0.9799
dDocent_Contig_6192	61	0.04473	748	0.9799
dDocent_Contig_13462	181	0.04479	747	0.9799
dDocent_Contig_24818	163	0.04485	746	0.9799
dDocent_Contig_48188	182	0.04485	746	0.9799
dDocent_Contig_28763	18	0.04491	745	0.9799
dDocent_Contig_15778	174	0.04497	744	0.9799
dDocent_Contig_30017	28	0.04503	743	0.9799
dDocent_Contig_12876	177	0.04509	742	0.9799
dDocent_Contig_12876	183	0.04509	742	0.9799
dDocent_Contig_12876	290	0.04509	742	0.9799
dDocent_Contig_2891	180	0.04515	741	0.9799
dDocent_Contig_14157	93	0.04515	741	0.9799
dDocent_Contig_9904	249	0.04527	750	0.9799
dDocent_Contig_32660	71	0.04539	737	0.9799
dDocent_Contig_2224	308	0.04539	737	0.9799
dDocent_Contig_31159	34	0.04545	736	0.9799
dDocent_Contig_27913	210	0.04545	747	0.9799
dDocent_Contig_24901	233	0.04552	735	0.9799
dDocent_Contig_20113	207	0.04558	734	0.9799
dDocent_Contig_10294	252	0.04558	745	0.9799
dDocent_Contig_18365	201	0.04564	733	0.9799
dDocent_Contig_17326	54	0.04564	733	0.9799
dDocent_Contig_10298	250	0.04564	744	0.9799
dDocent_Contig_6877	245	0.04576	742	0.9799
dDocent_Contig_21402	276	0.04588	740	0.9799
dDocent_Contig_26358	54	0.04589	729	0.9799
dDocent_Contig_50137	193	0.04595	728	0.9799
dDocent_Contig_5796	75	0.04595	728	0.9799
dDocent_Contig_6239	116	0.04595	728	0.9799
dDocent_Contig_7805	27	0.04595	739	0.9799
dDocent_Contig_7805	44	0.04595	739	0.9799
dDocent_Contig_7812	220	0.04602	727	0.9799
dDocent_Contig_11319	60	0.04607	737	0.9799
dDocent_Contig_24405	52	0.04607	737	0.9799
dDocent_Contig_44789	205	0.04608	726	0.9799
dDocent_Contig_13224	209	0.0462	735	0.9799
dDocent_Contig_34056	208	0.0462	735	0.9799
dDocent_Contig_22265	222	0.04626	734	0.9799
dDocent_Contig_30978	141	0.04626	734	0.9799
dDocent_Contig_49424	53	0.04632	733	0.9799
dDocent_Contig_29067	112	0.04633	722	0.9799
dDocent_Contig_13224	281	0.04633	722	0.9799
dDocent_Contig_14917	190	0.04645	731	0.9799
dDocent_Contig_6320	225	0.04646	720	0.9799
dDocent_Contig_50044	45	0.04646	720	0.9799
dDocent_Contig_10448	43	0.04672	716	0.9799
dDocent_Contig_30766	54	0.04679	715	0.9799
dDocent_Contig_8325	277	0.04685	714	0.9799
dDocent_Contig_27007	222	0.0469	724	0.9799
dDocent_Contig_16506	77	0.04698	712	0.9799
dDocent_Contig_19992	133	0.04705	711	0.9799
dDocent_Contig_31969	31	0.04712	710	0.9799
dDocent_Contig_5203	199	0.04712	710	0.9799
dDocent_Contig_5203	78	0.04712	710	0.9799
dDocent_Contig_7302	11	0.04725	708	0.9799
dDocent_Contig_22408	22	0.04745	705	0.9799
dDocent_Contig_13142	287	0.04759	703	0.9799
dDocent_Contig_23610	79	0.04765	702	0.9799
dDocent_Contig_8232	212	0.04765	702	0.9799
dDocent_Contig_5057	14	0.04765	702	0.9799
dDocent_Contig_5057	23	0.04765	702	0.9799
dDocent_Contig_21200	181	0.04772	701	0.9799
dDocent_Contig_28270	121	0.04775	711	0.9799
dDocent_Contig_17469	110	0.04782	710	0.9799
dDocent_Contig_21709	202	0.04786	699	0.9799
dDocent_Contig_1169	251	0.04786	699	0.9799
dDocent_Contig_6245	186	0.04789	709	0.9799
dDocent_Contig_370	200	0.04799	697	0.9799
dDocent_Contig_3420	242	0.04799	697	0.9799
dDocent_Contig_4892	55	0.04802	707	0.9799
dDocent_Contig_45901	253	0.04806	696	0.9799
dDocent_Contig_22700	213	0.04809	706	0.9799
dDocent_Contig_19513	23	0.0482	694	0.9799
dDocent_Contig_8303	240	0.04823	704	0.9799
dDocent_Contig_56997	62	0.04827	693	0.9799
dDocent_Contig_38356	36	0.04827	693	0.9799
dDocent_Contig_54832	242	0.0483	703	0.9799
dDocent_Contig_2083	196	0.0483	703	0.9799
dDocent_Contig_37523	90	0.04836	702	0.9799
dDocent_Contig_46629	173	0.04841	691	0.9799
dDocent_Contig_53518	109	0.04841	691	0.9799
dDocent_Contig_30840	65	0.04841	691	0.9799
dDocent_Contig_7554	210	0.04843	701	0.9799
dDocent_Contig_1724	203	0.04848	690	0.9799
dDocent_Contig_12136	48	0.04855	689	0.9799
dDocent_Contig_2070	286	0.04855	689	0.9799
dDocent_Contig_13429	32	0.04862	688	0.9799
dDocent_Contig_34504	154	0.04864	698	0.9799
dDocent_Contig_3496	174	0.04864	698	0.9799
dDocent_Contig_12732	115	0.04876	686	0.9799
dDocent_Contig_7104	271	0.04878	696	0.9799
dDocent_Contig_15406	231	0.04878	696	0.9799
dDocent_Contig_14975	101	0.04891	684	0.9799
dDocent_Contig_33617	305	0.04892	694	0.9799
dDocent_Contig_6430	157	0.04898	683	0.9799
dDocent_Contig_36756	176	0.04899	693	0.9799
dDocent_Contig_274	36	0.04906	692	0.9799
dDocent_Contig_24283	82	0.04912	681	0.9799
dDocent_Contig_44475	206	0.04919	680	0.9799
dDocent_Contig_25340	222	0.04928	689	0.9799
dDocent_Contig_38262	58	0.04948	676	0.9799
dDocent_Contig_55101	223	0.04948	676	0.9799
dDocent_Contig_45490	8	0.04948	676	0.9799
dDocent_Contig_6378	47	0.04948	676	0.9799
dDocent_Contig_10566	24	0.04948	676	0.9799
dDocent_Contig_54182	176	0.04948	676	0.9799
dDocent_Contig_54182	212	0.04948	676	0.9799
dDocent_Contig_54182	217	0.04948	676	0.9799
dDocent_Contig_54182	232	0.04948	676	0.9799
dDocent_Contig_54182	264	0.04948	676	0.9799
dDocent_Contig_10188	278	0.04956	675	0.9799
dDocent_Contig_38974	78	0.04964	684	0.9799
dDocent_Contig_42789	281	0.0497	673	0.9799
dDocent_Contig_3863	280	0.0497	673	0.9799
dDocent_Contig_12644	164	0.04971	683	0.9799
dDocent_Contig_24866	257	0.04978	682	0.9799
dDocent_Contig_11168	34	0.04985	671	0.9799
dDocent_Contig_26296	270	0.04993	680	0.9799
dDocent_Contig_21742	171	0.05	669	0.9799
dDocent_Contig_6073	233	0.05007	678	0.9799
dDocent_Contig_28023	116	0.05007	678	0.9799
dDocent_Contig_10003	211	0.05015	677	0.9799
dDocent_Contig_39903	65	0.05015	677	0.9799
dDocent_Contig_1191	16	0.05015	667	0.9799
dDocent_Contig_40176	33	0.05022	666	0.9799
dDocent_Contig_29819	273	0.0503	675	0.9799
dDocent_Contig_13173	77	0.05038	664	0.9799
dDocent_Contig_27137	288	0.05045	673	0.9799
dDocent_Contig_34409	210	0.05045	663	0.9799
dDocent_Contig_13217	28	0.05067	670	0.9799
dDocent_Contig_25576	72	0.05068	660	0.9799
dDocent_Contig_6078	102	0.05082	668	0.9799
dDocent_Contig_20180	283	0.05083	658	0.9799
dDocent_Contig_897	10	0.0509	667	0.9799
dDocent_Contig_3937	111	0.05091	657	0.9799
dDocent_Contig_15318	170	0.05115	654	0.9799
dDocent_Contig_46117	238	0.05115	654	0.9799
dDocent_Contig_22958	278	0.05122	653	0.9799
dDocent_Contig_793	122	0.05122	653	0.9799
dDocent_Contig_5428	57	0.0513	652	0.9799
dDocent_Contig_20873	40	0.0513	652	0.9799
dDocent_Contig_16935	9	0.05138	651	0.9799
dDocent_Contig_34114	270	0.05154	649	0.9799
dDocent_Contig_37183	27	0.05164	638	0.9799
dDocent_Contig_10189	158	0.05164	638	0.9799
dDocent_Contig_52345	161	0.0517	647	0.9799
dDocent_Contig_13316	78	0.05172	637	0.9799
dDocent_Contig_40670	24	0.05178	646	0.9799
dDocent_Contig_21095	186	0.05186	645	0.9799
dDocent_Contig_34364	34	0.05191	654	0.9799
dDocent_Contig_52461	165	0.05191	654	0.9799
dDocent_Contig_12357	195	0.05194	644	0.9799
dDocent_Contig_28003	280	0.05197	634	0.9799
dDocent_Contig_17496	169	0.05205	633	0.9799
dDocent_Contig_4576	57	0.05205	633	0.9799
dDocent_Contig_1883	302	0.0521	642	0.9799
dDocent_Contig_8343	41	0.05213	632	0.9799
dDocent_Contig_24426	198	0.05218	641	0.9799
dDocent_Contig_53860	105	0.05222	631	0.9799
dDocent_Contig_32756	69	0.05222	631	0.9799
dDocent_Contig_16433	226	0.05226	640	0.9799
dDocent_Contig_20367	229	0.05226	640	0.9799
dDocent_Contig_3566	287	0.05238	629	0.9799
dDocent_Contig_53992	216	0.05239	648	0.9799
dDocent_Contig_13060	110	0.05246	628	0.9799
dDocent_Contig_12762	267	0.05246	628	0.9799
dDocent_Contig_12183	56	0.05247	647	0.9799
dDocent_Contig_4286	8	0.05255	646	0.9799
dDocent_Contig_32389	99	0.05255	627	0.9799
dDocent_Contig_52631	80	0.05263	626	0.9799
dDocent_Contig_22186	59	0.05263	645	0.9799
dDocent_Contig_22186	71	0.05263	645	0.9799
dDocent_Contig_22186	80	0.05263	645	0.9799
dDocent_Contig_50117	57	0.05272	625	0.9799
dDocent_Contig_16785	166	0.05272	625	0.9799
dDocent_Contig_27035	92	0.0528	624	0.9799
dDocent_Contig_5495	265	0.05284	633	0.9799
dDocent_Contig_37660	268	0.05284	633	0.9799
dDocent_Contig_10189	202	0.05284	633	0.9799
dDocent_Contig_2831	114	0.05296	641	0.9799
dDocent_Contig_33455	221	0.05296	641	0.9799
dDocent_Contig_204	238	0.05297	622	0.9799
dDocent_Contig_2910	26	0.05297	622	0.9799
dDocent_Contig_6127	7	0.05301	631	0.9799
dDocent_Contig_13952	72	0.05309	630	0.9799
dDocent_Contig_17943	187	0.05323	619	0.9799
dDocent_Contig_31091	57	0.05331	618	0.9799
dDocent_Contig_51874	264	0.05331	618	0.9799
dDocent_Contig_9109	18	0.05331	618	0.9799
dDocent_Contig_28308	217	0.0534	617	0.9799
dDocent_Contig_12237	135	0.05343	626	0.9799
dDocent_Contig_1402	252	0.05351	625	0.9799
dDocent_Contig_11901	228	0.05351	625	0.9799
dDocent_Contig_10569	102	0.0536	624	0.9799
dDocent_Contig_2656	168	0.0536	624	0.9799
dDocent_Contig_26593	160	0.0536	624	0.9799
dDocent_Contig_50636	134	0.05383	612	0.9799
dDocent_Contig_23543	22	0.05392	611	0.9799
dDocent_Contig_15990	129	0.05392	611	0.9799
dDocent_Contig_15990	255	0.05392	611	0.9799
dDocent_Contig_15990	38	0.05392	611	0.9799
dDocent_Contig_15990	50	0.05392	611	0.9799
dDocent_Contig_15990	93	0.05392	611	0.9799
dDocent_Contig_44887	90	0.05403	619	0.9799
dDocent_Contig_9252	132	0.05419	608	0.9799
dDocent_Contig_4504	16	0.05421	617	0.9799
dDocent_Contig_59093	217	0.05421	617	0.9799
dDocent_Contig_30811	40	0.05428	607	0.9799
dDocent_Contig_45794	93	0.05437	606	0.9799
dDocent_Contig_34264	102	0.05437	606	0.9799
dDocent_Contig_218	286	0.05446	605	0.9799
dDocent_Contig_36028	187	0.05447	614	0.9799
dDocent_Contig_947	128	0.05455	604	0.9799
dDocent_Contig_9002	80	0.05464	603	0.9799
dDocent_Contig_41848	179	0.05465	612	0.9799
dDocent_Contig_39607	284	0.05483	610	0.9799
dDocent_Contig_11880	89	0.05491	600	0.9799
dDocent_Contig_975	227	0.05491	600	0.9799
dDocent_Contig_40318	143	0.05491	600	0.9799
dDocent_Contig_629	360	0.05491	600	0.9799
dDocent_Contig_4062	268	0.055	599	0.9799
dDocent_Contig_14125	87	0.055	599	0.9799
dDocent_Contig_2155	108	0.055	599	0.9799
dDocent_Contig_49006	6	0.055	599	0.9799
dDocent_Contig_21200	71	0.055	599	0.9799
dDocent_Contig_2083	265	0.05501	608	0.9799
dDocent_Contig_48	290	0.0551	607	0.9799
dDocent_Contig_8900	239	0.05519	606	0.9799
dDocent_Contig_4081	17	0.05537	604	0.9799
dDocent_Contig_13229	197	0.05546	603	0.9799
dDocent_Contig_8624	100	0.05546	594	0.9799
dDocent_Contig_1203	286	0.05556	593	0.9799
dDocent_Contig_6607	113	0.05565	601	0.9799
dDocent_Contig_10746	116	0.05565	592	0.9799
dDocent_Contig_10746	239	0.05565	592	0.9799
dDocent_Contig_11718	81	0.05574	600	0.9799
dDocent_Contig_14632	169	0.05574	591	0.9799
dDocent_Contig_4371	152	0.05574	600	0.9799
dDocent_Contig_16122	22	0.05583	599	0.9799
dDocent_Contig_10836	85	0.05584	590	0.9799
dDocent_Contig_12012	250	0.05593	589	0.9799
dDocent_Contig_17374	186	0.05593	598	0.9799
dDocent_Contig_53572	77	0.05593	598	0.9799
dDocent_Contig_37624	27	0.05593	589	0.9799
dDocent_Contig_19165	269	0.05602	597	0.9799
dDocent_Contig_1018	112	0.05611	596	0.9799
dDocent_Contig_19135	201	0.05611	596	0.9799
dDocent_Contig_14931	176	0.05612	587	0.9799
dDocent_Contig_41205	168	0.05621	595	0.9799
dDocent_Contig_2191	192	0.05622	586	0.9799
dDocent_Contig_5170	41	0.05622	586	0.9799
dDocent_Contig_3639	266	0.0563	594	0.9799
dDocent_Contig_3639	282	0.0563	594	0.9799
dDocent_Contig_11925	64	0.05631	585	0.9799
dDocent_Contig_3998	38	0.05631	585	0.9799
dDocent_Contig_53518	249	0.0564	593	0.9799
dDocent_Contig_3405	284	0.05641	584	0.9799
dDocent_Contig_17770	223	0.05641	584	0.9799
dDocent_Contig_31816	47	0.05649	592	0.9799
dDocent_Contig_30356	213	0.05659	591	0.9799
dDocent_Contig_11456	40	0.0566	582	0.9799
dDocent_Contig_32729	109	0.05668	590	0.9799
dDocent_Contig_24651	168	0.05678	589	0.9799
dDocent_Contig_3083	84	0.0568	580	0.9799
dDocent_Contig_19071	277	0.05697	587	0.9799
dDocent_Contig_4284	245	0.05697	587	0.9799
dDocent_Contig_47683	272	0.05699	578	0.9799
dDocent_Contig_37899	73	0.05699	578	0.9799
dDocent_Contig_39853	120	0.05717	585	0.9799
dDocent_Contig_33338	115	0.05719	576	0.9799
dDocent_Contig_54024	64	0.05726	584	0.9799
dDocent_Contig_28808	275	0.05729	575	0.9799
dDocent_Contig_6866	176	0.05729	575	0.9799
dDocent_Contig_11531	25	0.05739	574	0.9799
dDocent_Contig_1886	84	0.05739	574	0.9799
dDocent_Contig_10	280	0.05739	574	0.9799
dDocent_Contig_9421	257	0.05746	582	0.9799
dDocent_Contig_22700	158	0.05746	582	0.9799
dDocent_Contig_23857	276	0.05749	573	0.9799
dDocent_Contig_12915	266	0.05749	573	0.9799
dDocent_Contig_2016	203	0.05756	581	0.9799
dDocent_Contig_2016	230	0.05756	581	0.9799
dDocent_Contig_31985	116	0.05756	581	0.9799
dDocent_Contig_31985	61	0.05756	581	0.9799
dDocent_Contig_32998	230	0.05756	581	0.9799
dDocent_Contig_41601	90	0.05759	572	0.9799
dDocent_Contig_14177	62	0.05759	572	0.9799
dDocent_Contig_31267	81	0.05776	579	0.9799
dDocent_Contig_4247	263	0.05779	570	0.9799
dDocent_Contig_21941	10	0.05786	578	0.9799
dDocent_Contig_28639	127	0.0581	567	0.9799
dDocent_Contig_11493	121	0.0581	567	0.9799
dDocent_Contig_48819	5	0.0581	567	0.9799
dDocent_Contig_2159	277	0.0581	567	0.9799
dDocent_Contig_23315	38	0.05816	575	0.9799
dDocent_Contig_4363	34	0.0582	566	0.9799
dDocent_Contig_47695	182	0.0583	565	0.9799
dDocent_Contig_49744	186	0.0583	565	0.9799
dDocent_Contig_25411	48	0.05836	573	0.9799
dDocent_Contig_20975	127	0.05846	572	0.9799
dDocent_Contig_24988	191	0.05851	563	0.9799
dDocent_Contig_1634	245	0.05857	571	0.9799
dDocent_Contig_57777	180	0.05857	571	0.9799
dDocent_Contig_57777	234	0.05857	571	0.9799
dDocent_Contig_6649	216	0.05861	562	0.9799
dDocent_Contig_11035	111	0.05861	562	0.9799
dDocent_Contig_847	182	0.05867	570	0.9799
dDocent_Contig_33683	161	0.05867	570	0.9799
dDocent_Contig_37421	115	0.05872	561	0.9799
dDocent_Contig_25378	233	0.05872	561	0.9799
dDocent_Contig_23319	96	0.05872	561	0.9799
dDocent_Contig_11423	274	0.05882	560	0.9799
dDocent_Contig_32689	179	0.05882	560	0.9799
dDocent_Contig_7831	196	0.05882	560	0.9799
dDocent_Contig_5140	273	0.05888	568	0.9799
dDocent_Contig_2051	263	0.05893	559	0.9799
dDocent_Contig_5496	208	0.05893	559	0.9799
dDocent_Contig_50137	44	0.05898	567	0.9799
dDocent_Contig_18384	101	0.05898	567	0.9799
dDocent_Contig_22406	45	0.05903	558	0.9799
dDocent_Contig_1058	283	0.05908	566	0.9799
dDocent_Contig_22023	18	0.05908	566	0.9799
dDocent_Contig_28241	272	0.05914	557	0.9799
dDocent_Contig_18250	167	0.05914	557	0.9799
dDocent_Contig_6970	162	0.05914	557	0.9799
dDocent_Contig_6970	8	0.05914	557	0.9799
dDocent_Contig_6970	83	0.05914	557	0.9799
dDocent_Contig_11294	75	0.05919	565	0.9799
dDocent_Contig_20431	139	0.05935	555	0.9799
dDocent_Contig_35697	225	0.05946	554	0.9799
dDocent_Contig_53074	221	0.0595	562	0.9799
dDocent_Contig_57833	240	0.0595	562	0.9799
dDocent_Contig_49533	215	0.05971	560	0.9799
dDocent_Contig_4018	204	0.05971	560	0.9799
dDocent_Contig_39666	54	0.05978	551	0.9799
dDocent_Contig_15326	130	0.05982	559	0.9799
dDocent_Contig_35638	167	0.05982	559	0.9799
dDocent_Contig_1104	234	0.05982	559	0.9799
dDocent_Contig_27089	123	0.05982	559	0.9799
dDocent_Contig_21667	105	0.05989	550	0.9799
dDocent_Contig_13536	226	0.06	549	0.9799
dDocent_Contig_13536	261	0.06	549	0.9799
dDocent_Contig_9632	52	0.06	549	0.9799
dDocent_Contig_15749	45	0.06	549	0.9799
dDocent_Contig_12576	180	0.06011	548	0.9799
dDocent_Contig_28857	278	0.06022	547	0.9799
dDocent_Contig_23346	191	0.06025	555	0.9799
dDocent_Contig_3607	89	0.06033	546	0.9799
dDocent_Contig_53421	193	0.06033	546	0.9799
dDocent_Contig_20049	27	0.06033	546	0.9799
dDocent_Contig_18372	274	0.06044	545	0.9799
dDocent_Contig_35661	75	0.06044	545	0.9799
dDocent_Contig_572	60	0.06044	545	0.9799
dDocent_Contig_26592	34	0.06044	545	0.9799
dDocent_Contig_26592	85	0.06044	545	0.9799
dDocent_Contig_15478	223	0.06055	544	0.9799
dDocent_Contig_46129	85	0.06055	544	0.9799
dDocent_Contig_6495	21	0.06058	552	0.9799
dDocent_Contig_25356	141	0.06066	543	0.9799
dDocent_Contig_44852	250	0.06069	551	0.9799
dDocent_Contig_33768	189	0.06077	542	0.9799
dDocent_Contig_27052	49	0.06077	542	0.9799
dDocent_Contig_14319	191	0.0608	550	0.9799
dDocent_Contig_30693	31	0.0608	550	0.9799
dDocent_Contig_3360	93	0.06089	541	0.9799
dDocent_Contig_6330	129	0.06089	541	0.9799
dDocent_Contig_14877	97	0.06089	541	0.9799
dDocent_Contig_2951	123	0.06089	541	0.9799
dDocent_Contig_2951	65	0.06089	541	0.9799
dDocent_Contig_51149	277	0.06089	541	0.9799
dDocent_Contig_23319	242	0.06091	549	0.9799
dDocent_Contig_14563	47	0.061	540	0.9799
dDocent_Contig_4797	165	0.061	540	0.9799
dDocent_Contig_2690	156	0.06102	548	0.9799
dDocent_Contig_47771	104	0.06102	548	0.9799
dDocent_Contig_27430	30	0.06111	539	0.9799
dDocent_Contig_4426	254	0.06111	539	0.9799
dDocent_Contig_48490	269	0.06122	538	0.9799
dDocent_Contig_37705	89	0.06124	546	0.9799
dDocent_Contig_36904	99	0.06124	546	0.9799
dDocent_Contig_20732	327	0.06134	537	0.9799
dDocent_Contig_4461	182	0.06134	537	0.9799
dDocent_Contig_40248	245	0.06136	545	0.9799
dDocent_Contig_17115	180	0.06145	536	0.9799
dDocent_Contig_17115	206	0.06145	536	0.9799
dDocent_Contig_7229	114	0.06145	536	0.9799
dDocent_Contig_48798	245	0.06157	535	0.9799
dDocent_Contig_12686	185	0.06157	535	0.9799
dDocent_Contig_27230	213	0.06168	534	0.9799
dDocent_Contig_28726	123	0.06168	534	0.9799
dDocent_Contig_16206	111	0.06168	534	0.9799
dDocent_Contig_27400	66	0.06168	534	0.9799
dDocent_Contig_6341	204	0.06168	534	0.9799
dDocent_Contig_35184	119	0.0618	533	0.9799
dDocent_Contig_16553	84	0.0618	533	0.9799
dDocent_Contig_43839	227	0.0618	533	0.9799
dDocent_Contig_16507	38	0.0618	533	0.9799
dDocent_Contig_3265	17	0.06181	541	0.9799
dDocent_Contig_4028	43	0.06181	541	0.9799
dDocent_Contig_44533	118	0.06191	532	0.9799
dDocent_Contig_4434	220	0.06191	532	0.9799
dDocent_Contig_51926	112	0.06191	532	0.9799
dDocent_Contig_14111	260	0.06192	540	0.9799
dDocent_Contig_31362	247	0.06203	531	0.9799
dDocent_Contig_35449	166	0.06203	531	0.9799
dDocent_Contig_19882	158	0.06215	530	0.9799
dDocent_Contig_6572	253	0.06215	530	0.9799
dDocent_Contig_38394	246	0.06215	538	0.9799
dDocent_Contig_11938	262	0.06215	538	0.9799
dDocent_Contig_2573	6	0.06215	530	0.9799
dDocent_Contig_9825	44	0.06226	529	0.9799
dDocent_Contig_3641	106	0.06227	537	0.9799
dDocent_Contig_19750	270	0.06227	537	0.9799
dDocent_Contig_28726	203	0.06238	528	0.9799
dDocent_Contig_51996	274	0.06238	536	0.9799
dDocent_Contig_20847	67	0.06238	528	0.9799
dDocent_Contig_12020	230	0.06238	528	0.9799
dDocent_Contig_12020	247	0.06238	528	0.9799
dDocent_Contig_29032	160	0.06238	536	0.9799
dDocent_Contig_3159	250	0.0625	527	0.9799
dDocent_Contig_3743	38	0.0625	527	0.9799
dDocent_Contig_42771	255	0.0625	527	0.9799
dDocent_Contig_51184	52	0.06262	526	0.9799
dDocent_Contig_8154	24	0.06262	526	0.9799
dDocent_Contig_8154	3	0.06262	526	0.9799
dDocent_Contig_37571	233	0.06273	533	0.9799
dDocent_Contig_36682	224	0.06274	525	0.9799
dDocent_Contig_25004	130	0.06274	525	0.9799
dDocent_Contig_29856	173	0.06274	525	0.9799
dDocent_Contig_15548	280	0.06285	532	0.9799
dDocent_Contig_43038	80	0.06285	532	0.9799
dDocent_Contig_30944	59	0.06286	524	0.9799
dDocent_Contig_13603	82	0.06297	531	0.9799
dDocent_Contig_27039	101	0.06297	531	0.9799
dDocent_Contig_11279	87	0.06298	523	0.9799
dDocent_Contig_50277	215	0.06298	523	0.9799
dDocent_Contig_38300	199	0.0631	522	0.9799
dDocent_Contig_6404	67	0.0631	522	0.9799
dDocent_Contig_35845	20	0.0631	522	0.9799
dDocent_Contig_2389	24	0.06321	529	0.9799
dDocent_Contig_19401	241	0.06321	529	0.9799
dDocent_Contig_2070	76	0.06321	529	0.9799
dDocent_Contig_5342	178	0.06322	521	0.9799
dDocent_Contig_51680	211	0.06333	528	0.9799
dDocent_Contig_28808	117	0.06334	520	0.9799
dDocent_Contig_32344	130	0.06334	520	0.9799
dDocent_Contig_30485	11	0.06346	519	0.9799
dDocent_Contig_9130	237	0.06346	519	0.9799
dDocent_Contig_24939	271	0.06346	519	0.9799
dDocent_Contig_19828	29	0.06346	519	0.9799
dDocent_Contig_12582	124	0.06357	526	0.9799
dDocent_Contig_44693	89	0.06357	526	0.9799
dDocent_Contig_51238	33	0.06357	526	0.9799
dDocent_Contig_9619	264	0.06358	518	0.9799
dDocent_Contig_16477	215	0.06358	518	0.9799
dDocent_Contig_20493	109	0.06358	518	0.9799
dDocent_Contig_42416	42	0.06358	518	0.9799
dDocent_Contig_38336	215	0.06358	518	0.9799
dDocent_Contig_48018	274	0.06358	518	0.9799
dDocent_Contig_15088	96	0.06369	525	0.9799
dDocent_Contig_4492	50	0.06371	517	0.9799
dDocent_Contig_21808	12	0.06371	517	0.9799
dDocent_Contig_4435	96	0.06383	516	0.9799
dDocent_Contig_33749	72	0.06383	516	0.9799
dDocent_Contig_4142	257	0.06393	523	0.9799
dDocent_Contig_10720	220	0.06395	515	0.9799
dDocent_Contig_22158	171	0.06408	514	0.9799
dDocent_Contig_43157	159	0.06408	514	0.9799
dDocent_Contig_49435	46	0.06408	514	0.9799
dDocent_Contig_47489	210	0.06418	521	0.9799
dDocent_Contig_6601	153	0.0642	513	0.9799
dDocent_Contig_19961	225	0.0643	520	0.9799
dDocent_Contig_45954	14	0.06433	512	0.9799
dDocent_Contig_1391	230	0.06445	511	0.9799
dDocent_Contig_23763	167	0.06445	511	0.9799
dDocent_Contig_12027	220	0.06458	510	0.9799
dDocent_Contig_17541	95	0.06458	510	0.9799
dDocent_Contig_22738	235	0.06458	510	0.9799
dDocent_Contig_19823	41	0.06467	517	0.9799
dDocent_Contig_19823	97	0.06467	517	0.9799
dDocent_Contig_39580	186	0.06471	509	0.9799
dDocent_Contig_3533	141	0.0648	516	0.9799
dDocent_Contig_43562	270	0.0648	516	0.9799
dDocent_Contig_22948	286	0.06483	508	0.9799
dDocent_Contig_32351	39	0.06492	515	0.9799
dDocent_Contig_19360	278	0.06492	515	0.9799
dDocent_Contig_15636	83	0.06518	513	0.9799
dDocent_Contig_21168	32	0.06522	505	0.9799
dDocent_Contig_45235	193	0.06522	505	0.9799
dDocent_Contig_53699	152	0.06522	505	0.9799
dDocent_Contig_8221	188	0.06535	504	0.9799
dDocent_Contig_29190	62	0.06543	511	0.9799
dDocent_Contig_2388	136	0.06543	511	0.9799
dDocent_Contig_9828	104	0.06543	511	0.9799
dDocent_Contig_48062	268	0.06548	503	0.9799
dDocent_Contig_24015	278	0.06548	503	0.9799
dDocent_Contig_7501	278	0.06548	503	0.9799
dDocent_Contig_11279	62	0.06548	503	0.9799
dDocent_Contig_22406	273	0.06556	510	0.9799
dDocent_Contig_18963	218	0.06561	502	0.9799
dDocent_Contig_53589	219	0.06561	502	0.9799
dDocent_Contig_15527	202	0.06561	502	0.9799
dDocent_Contig_22047	315	0.06561	502	0.9799
dDocent_Contig_25575	227	0.06561	502	0.9799
dDocent_Contig_19021	29	0.06561	502	0.9799
dDocent_Contig_7316	192	0.06574	501	0.9799
dDocent_Contig_39350	196	0.06574	501	0.9799
dDocent_Contig_39350	203	0.06574	501	0.9799
dDocent_Contig_5636	155	0.06582	508	0.9799
dDocent_Contig_6874	142	0.06587	500	0.9799
dDocent_Contig_35439	33	0.06587	500	0.9799
dDocent_Contig_13104	72	0.06587	500	0.9799
dDocent_Contig_21484	260	0.066	499	0.9799
dDocent_Contig_23306	273	0.06613	498	0.9799
dDocent_Contig_12504	15	0.06627	497	0.9799
dDocent_Contig_39804	278	0.06627	497	0.9799
dDocent_Contig_16143	193	0.06627	497	0.9799
dDocent_Contig_3738	7	0.06634	504	0.9799
dDocent_Contig_9321	253	0.06634	504	0.9799
dDocent_Contig_45263	192	0.06634	504	0.9799
dDocent_Contig_45782	87	0.06634	504	0.9799
dDocent_Contig_13557	72	0.0664	496	0.9799
dDocent_Contig_25251	159	0.0664	496	0.9799
dDocent_Contig_8010	113	0.06646	488	0.9799
dDocent_Contig_43941	105	0.06646	488	0.9799
dDocent_Contig_27502	208	0.06646	488	0.9799
dDocent_Contig_17263	37	0.06647	503	0.9799
dDocent_Contig_3085	233	0.06647	503	0.9799
dDocent_Contig_2070	78	0.06653	495	0.9799
dDocent_Contig_8651	218	0.06653	495	0.9799
dDocent_Contig_28244	265	0.06653	495	0.9799
dDocent_Contig_14948	5	0.06653	495	0.9799
dDocent_Contig_6901	163	0.06653	495	0.9799
dDocent_Contig_1468	92	0.0666	487	0.9799
dDocent_Contig_44981	220	0.0666	487	0.9799
dDocent_Contig_25874	228	0.0666	487	0.9799
dDocent_Contig_2878	157	0.0666	502	0.9799
dDocent_Contig_42632	211	0.0666	502	0.9799
dDocent_Contig_21893	273	0.06667	494	0.9799
dDocent_Contig_29478	157	0.06667	494	0.9799
dDocent_Contig_7501	117	0.06674	486	0.9799
dDocent_Contig_1891	25	0.06674	486	0.9799
dDocent_Contig_31772	211	0.0668	493	0.9799
dDocent_Contig_30796	129	0.06687	485	0.9799
dDocent_Contig_20418	212	0.06687	500	0.9799
dDocent_Contig_47025	39	0.06687	485	0.9799
dDocent_Contig_15665	91	0.06687	485	0.9799
dDocent_Contig_12047	116	0.06694	492	0.9799
dDocent_Contig_19873	228	0.06694	492	0.9799
dDocent_Contig_25365	55	0.06694	492	0.9799
dDocent_Contig_43564	13	0.06701	484	0.9799
dDocent_Contig_25458	134	0.06701	484	0.9799
dDocent_Contig_34862	216	0.06701	484	0.9799
dDocent_Contig_24966	48	0.06701	484	0.9799
dDocent_Contig_10870	270	0.06715	483	0.9799
dDocent_Contig_7871	269	0.06715	483	0.9799
dDocent_Contig_24527	76	0.06729	482	0.9799
dDocent_Contig_41619	208	0.06729	482	0.9799
dDocent_Contig_41619	257	0.06729	482	0.9799
dDocent_Contig_41619	276	0.06729	482	0.9799
dDocent_Contig_13938	131	0.06729	482	0.9799
dDocent_Contig_22247	81	0.06729	482	0.9799
dDocent_Contig_6773	27	0.06729	482	0.9799
dDocent_Contig_9452	140	0.06735	489	0.9799
dDocent_Contig_22403	34	0.06735	489	0.9799
dDocent_Contig_11340	209	0.06743	481	0.9799
dDocent_Contig_12784	200	0.06743	481	0.9799
dDocent_Contig_46042	166	0.06748	488	0.9799
dDocent_Contig_7859	68	0.06757	480	0.9799
dDocent_Contig_12767	10	0.06757	480	0.9799
dDocent_Contig_25378	222	0.06757	480	0.9799
dDocent_Contig_6341	109	0.06757	480	0.9799
dDocent_Contig_8402	184	0.06757	480	0.9799
dDocent_Contig_19421	295	0.06757	480	0.9799
dDocent_Contig_27360	261	0.06762	487	0.9799
dDocent_Contig_5024	49	0.06762	487	0.9799
dDocent_Contig_37167	45	0.06762	487	0.9799
dDocent_Contig_15131	238	0.06776	486	0.9799
dDocent_Contig_5209	215	0.06776	486	0.9799
dDocent_Contig_542	76	0.06785	478	0.9799
dDocent_Contig_8946	192	0.06785	478	0.9799
dDocent_Contig_19200	160	0.06785	478	0.9799
dDocent_Contig_26051	256	0.06785	478	0.9799
dDocent_Contig_26853	201	0.0679	485	0.9799
dDocent_Contig_19750	257	0.06813	476	0.9799
dDocent_Contig_20032	104	0.06813	476	0.9799
dDocent_Contig_1509	71	0.06813	476	0.9799
dDocent_Contig_11760	138	0.06813	476	0.9799
dDocent_Contig_14247	329	0.06828	475	0.9799
dDocent_Contig_15808	42	0.06828	475	0.9799
dDocent_Contig_48152	156	0.06828	475	0.9799
dDocent_Contig_26425	170	0.06828	475	0.9799
dDocent_Contig_17720	294	0.06832	482	0.9799
dDocent_Contig_13257	133	0.06857	473	0.9799
dDocent_Contig_2762	167	0.06861	480	0.9799
dDocent_Contig_43674	123	0.06861	480	0.9799
dDocent_Contig_23194	233	0.06871	472	0.9799
dDocent_Contig_30827	123	0.06871	472	0.9799
dDocent_Contig_2976	288	0.06875	479	0.9799
dDocent_Contig_26343	108	0.06875	479	0.9799
dDocent_Contig_6030	256	0.06886	471	0.9799
dDocent_Contig_18614	96	0.06889	478	0.9799
dDocent_Contig_4818	42	0.06889	478	0.9799
dDocent_Contig_17368	78	0.06889	478	0.9799
dDocent_Contig_30147	184	0.06889	478	0.9799
dDocent_Contig_57472	117	0.069	470	0.9799
dDocent_Contig_2109	64	0.069	470	0.9799
dDocent_Contig_37033	49	0.069	470	0.9799
dDocent_Contig_17652	178	0.069	470	0.9799
dDocent_Contig_25282	246	0.06915	469	0.9799
dDocent_Contig_5517	266	0.06915	469	0.9799
dDocent_Contig_27852	141	0.06918	476	0.9799
dDocent_Contig_12590	106	0.06918	476	0.9799
dDocent_Contig_24352	249	0.06933	475	0.9799
dDocent_Contig_15670	218	0.06944	467	0.9799
dDocent_Contig_20175	129	0.06944	467	0.9799
dDocent_Contig_45939	291	0.06947	474	0.9799
dDocent_Contig_10271	77	0.06959	466	0.9799
dDocent_Contig_12357	163	0.06959	466	0.9799
dDocent_Contig_36922	190	0.06959	466	0.9799
dDocent_Contig_5824	108	0.06974	465	0.9799
dDocent_Contig_29294	175	0.06974	465	0.9799
dDocent_Contig_6439	251	0.06977	472	0.9799
dDocent_Contig_44846	113	0.06989	464	0.9799
dDocent_Contig_42047	82	0.06989	464	0.9799
dDocent_Contig_48634	274	0.06989	464	0.9799
dDocent_Contig_11642	116	0.06992	471	0.9799
dDocent_Contig_44365	215	0.06992	471	0.9799
dDocent_Contig_30079	199	0.07004	463	0.9799
dDocent_Contig_5682	173	0.07004	463	0.9799
dDocent_Contig_4313	130	0.07004	463	0.9799
dDocent_Contig_7942	211	0.07006	470	0.9799
dDocent_Contig_12923	278	0.07019	462	0.9799
dDocent_Contig_22365	242	0.07019	462	0.9799
dDocent_Contig_22923	153	0.07019	462	0.9799
dDocent_Contig_38378	180	0.07019	462	0.9799
dDocent_Contig_3062	125	0.07035	461	0.9799
dDocent_Contig_4772	85	0.07035	461	0.9799
dDocent_Contig_13076	48	0.07035	461	0.9799
dDocent_Contig_39364	291	0.07035	461	0.9799
dDocent_Contig_29561	93	0.07035	461	0.9799
dDocent_Contig_6654	195	0.0705	460	0.9799
dDocent_Contig_49285	166	0.0705	460	0.9799
dDocent_Contig_5388	50	0.0705	460	0.9799
dDocent_Contig_4082	221	0.07065	459	0.9799
dDocent_Contig_20462	51	0.07065	459	0.9799
dDocent_Contig_4413	214	0.07065	459	0.9799
dDocent_Contig_34834	122	0.07066	466	0.9799
dDocent_Contig_55971	47	0.07081	458	0.9799
dDocent_Contig_56631	55	0.07081	458	0.9799
dDocent_Contig_37861	230	0.07081	458	0.9799
dDocent_Contig_15586	27	0.07082	465	0.9799
dDocent_Contig_3238	248	0.07096	457	0.9799
dDocent_Contig_20942	188	0.07097	464	0.9799
dDocent_Contig_5458	140	0.07127	455	0.9799
dDocent_Contig_13333	154	0.07127	455	0.9799
dDocent_Contig_12831	281	0.07143	454	0.9799
dDocent_Contig_6060	205	0.07143	461	0.9799
dDocent_Contig_53709	239	0.07143	454	0.9799
dDocent_Contig_18735	163	0.07158	460	0.9799
dDocent_Contig_10775	212	0.07158	460	0.9799
dDocent_Contig_45250	124	0.07158	460	0.9799
dDocent_Contig_1148	246	0.07158	460	0.9799
dDocent_Contig_23610	58	0.07159	453	0.9799
dDocent_Contig_29687	167	0.07159	453	0.9799
dDocent_Contig_7270	20	0.07159	453	0.9799
dDocent_Contig_43674	207	0.07159	453	0.9799
dDocent_Contig_4276	141	0.07174	452	0.9799
dDocent_Contig_23496	141	0.0719	451	0.9799
dDocent_Contig_20093	156	0.0719	451	0.9799
dDocent_Contig_14084	273	0.0719	458	0.9799
dDocent_Contig_28338	273	0.07205	457	0.9799
dDocent_Contig_20054	107	0.07206	450	0.9799
dDocent_Contig_45619	171	0.07206	450	0.9799
dDocent_Contig_45619	224	0.07206	450	0.9799
dDocent_Contig_27440	32	0.07206	450	0.9799
dDocent_Contig_52541	92	0.07221	456	0.9799
dDocent_Contig_23263	188	0.07221	456	0.9799
dDocent_Contig_12400	126	0.07221	456	0.9799
dDocent_Contig_14299	36	0.07222	449	0.9799
dDocent_Contig_15326	61	0.07222	449	0.9799
dDocent_Contig_36990	37	0.07238	448	0.9799
dDocent_Contig_31327	137	0.07238	448	0.9799
dDocent_Contig_43674	189	0.07253	454	0.9799
dDocent_Contig_9213	116	0.07253	454	0.9799
dDocent_Contig_36399	28	0.07254	447	0.9799
dDocent_Contig_429	122	0.07269	453	0.9799
dDocent_Contig_38228	179	0.07271	446	0.9799
dDocent_Contig_31955	108	0.07271	446	0.9799
dDocent_Contig_20455	206	0.07271	446	0.9799
dDocent_Contig_22270	135	0.07271	446	0.9799
dDocent_Contig_18716	233	0.07271	446	0.9799
dDocent_Contig_32233	43	0.07271	446	0.9799
dDocent_Contig_52461	158	0.07271	446	0.9799
dDocent_Contig_14425	51	0.07271	446	0.9799
dDocent_Contig_20811	270	0.07285	452	0.9799
dDocent_Contig_4862	73	0.07285	452	0.9799
dDocent_Contig_10417	30	0.07287	445	0.9799
dDocent_Contig_26453	125	0.07301	451	0.9799
dDocent_Contig_2743	290	0.07301	451	0.9799
dDocent_Contig_9168	240	0.07317	450	0.9799
dDocent_Contig_7418	22	0.0732	443	0.9799
dDocent_Contig_12516	86	0.0732	443	0.9799
dDocent_Contig_16446	265	0.0732	443	0.9799
dDocent_Contig_28664	62	0.0732	443	0.9799
dDocent_Contig_43038	200	0.07336	442	0.9799
dDocent_Contig_22047	28	0.07336	442	0.9799
dDocent_Contig_573	114	0.07336	442	0.9799
dDocent_Contig_2470	264	0.07336	442	0.9799
dDocent_Contig_23346	158	0.0735	448	0.9799
dDocent_Contig_22043	247	0.07353	441	0.9799
dDocent_Contig_27840	210	0.07366	447	0.9799
dDocent_Contig_3872	234	0.07366	447	0.9799
dDocent_Contig_3099	100	0.07366	447	0.9799
dDocent_Contig_30533	287	0.0737	440	0.9799
dDocent_Contig_13979	13	0.0737	440	0.9799
dDocent_Contig_7599	138	0.07383	446	0.9799
dDocent_Contig_49883	52	0.07383	446	0.9799
dDocent_Contig_30680	262	0.07383	446	0.9799
dDocent_Contig_34521	64	0.07386	439	0.9799
dDocent_Contig_2056	169	0.07386	439	0.9799
dDocent_Contig_44354	207	0.07399	445	0.9799
dDocent_Contig_8789	36	0.07403	438	0.9799
dDocent_Contig_3853	17	0.07403	438	0.9799
dDocent_Contig_3853	38	0.07403	438	0.9799
dDocent_Contig_19411	195	0.07403	438	0.9799
dDocent_Contig_19411	215	0.07403	438	0.9799
dDocent_Contig_11528	161	0.07403	438	0.9799
dDocent_Contig_23077	272	0.07432	443	0.9799
dDocent_Contig_23077	61	0.07432	443	0.9799
dDocent_Contig_19800	110	0.07437	436	0.9799
dDocent_Contig_40945	94	0.07449	442	0.9799
dDocent_Contig_18050	125	0.07454	435	0.9799
dDocent_Contig_22274	118	0.07454	435	0.9799
dDocent_Contig_30821	160	0.07454	435	0.9799
dDocent_Contig_7686	254	0.07454	435	0.9799
dDocent_Contig_23363	257	0.07454	435	0.9799
dDocent_Contig_41326	284	0.07466	441	0.9799
dDocent_Contig_17072	77	0.07471	434	0.9799
dDocent_Contig_4276	239	0.07471	434	0.9799
dDocent_Contig_5018	153	0.07471	434	0.9799
dDocent_Contig_38157	240	0.07471	434	0.9799
dDocent_Contig_4862	276	0.07471	434	0.9799
dDocent_Contig_10927	102	0.07488	433	0.9799
dDocent_Contig_13943	209	0.075	439	0.9799
dDocent_Contig_14855	172	0.07506	432	0.9799
dDocent_Contig_25033	116	0.07506	432	0.9799
dDocent_Contig_19976	24	0.07506	432	0.9799
dDocent_Contig_23655	177	0.07506	432	0.9799
dDocent_Contig_33676	63	0.07517	438	0.9799
dDocent_Contig_17608	286	0.07517	438	0.9799
dDocent_Contig_18383	75	0.07523	431	0.9799
dDocent_Contig_9744	61	0.07523	431	0.9799
dDocent_Contig_4482	91	0.07523	431	0.9799
dDocent_Contig_8790	16	0.07541	430	0.9799
dDocent_Contig_5531	134	0.07558	429	0.9799
dDocent_Contig_10406	226	0.07569	435	0.9799
dDocent_Contig_18541	167	0.07569	435	0.9799
dDocent_Contig_10507	217	0.07576	428	0.9799
dDocent_Contig_40608	277	0.07586	434	0.9799
dDocent_Contig_42784	77	0.07586	434	0.9799
dDocent_Contig_29253	152	0.07586	434	0.9799
dDocent_Contig_40889	66	0.07604	433	0.9799
dDocent_Contig_20942	91	0.07604	433	0.9799
dDocent_Contig_35149	28	0.07611	426	0.9799
dDocent_Contig_6599	62	0.07611	426	0.9799
dDocent_Contig_43258	69	0.07621	432	0.9799
dDocent_Contig_51640	76	0.07629	425	0.9799
dDocent_Contig_2258	282	0.07629	425	0.9799
dDocent_Contig_22616	200	0.07629	425	0.9799
dDocent_Contig_43898	34	0.07639	431	0.9799
dDocent_Contig_33932	223	0.07639	431	0.9799
dDocent_Contig_32086	123	0.07647	424	0.9799
dDocent_Contig_9443	124	0.07657	430	0.9799
dDocent_Contig_11165	152	0.07665	423	0.9799
dDocent_Contig_2335	193	0.07665	423	0.9799
dDocent_Contig_24535	204	0.07665	423	0.9799
dDocent_Contig_16545	84	0.07665	423	0.9799
dDocent_Contig_4806	250	0.07683	422	0.9799
dDocent_Contig_6000	101	0.07683	422	0.9799
dDocent_Contig_5436	263	0.07683	422	0.9799
dDocent_Contig_5955	81	0.07701	421	0.9799
dDocent_Contig_36904	225	0.0771	427	0.9799
dDocent_Contig_21539	163	0.0772	420	0.9799
dDocent_Contig_3172	48	0.0772	420	0.9799
dDocent_Contig_31891	135	0.07728	426	0.9799
dDocent_Contig_13840	214	0.07728	426	0.9799
dDocent_Contig_19771	110	0.07728	426	0.9799
dDocent_Contig_16430	93	0.07738	419	0.9799
dDocent_Contig_1258	277	0.07738	419	0.9799
dDocent_Contig_38027	208	0.07738	419	0.9799
dDocent_Contig_1408	106	0.07738	419	0.9799
dDocent_Contig_20630	48	0.07746	425	0.9799
dDocent_Contig_17034	118	0.07746	425	0.9799
dDocent_Contig_51791	86	0.07757	418	0.9799
dDocent_Contig_8708	33	0.07775	417	0.9799
dDocent_Contig_44759	168	0.07775	417	0.9799
dDocent_Contig_31504	118	0.07775	417	0.9799
dDocent_Contig_4375	160	0.07775	417	0.9799
dDocent_Contig_15503	120	0.07775	417	0.9799
dDocent_Contig_152	232	0.07794	416	0.9799
dDocent_Contig_16233	87	0.07801	422	0.9799
dDocent_Contig_7859	134	0.07801	422	0.9799
dDocent_Contig_44256	92	0.07801	422	0.9799
dDocent_Contig_5160	140	0.07812	415	0.9799
dDocent_Contig_15043	279	0.0782	421	0.9799
dDocent_Contig_3152	163	0.07831	414	0.9799
dDocent_Contig_28913	216	0.07831	414	0.9799
dDocent_Contig_25519	186	0.07838	420	0.9799
dDocent_Contig_6698	174	0.07869	412	0.9799
dDocent_Contig_4713	253	0.07869	412	0.9799
dDocent_Contig_23997	224	0.07869	412	0.9799
dDocent_Contig_43810	262	0.07869	412	0.9799
dDocent_Contig_15599	287	0.07869	412	0.9799
dDocent_Contig_1823	168	0.07869	412	0.9799
dDocent_Contig_14468	280	0.07888	411	0.9799
dDocent_Contig_17856	90	0.07895	417	0.9799
dDocent_Contig_8550	165	0.07895	417	0.9799
dDocent_Contig_9059	24	0.07908	410	0.9799
dDocent_Contig_20387	164	0.07914	416	0.9799
dDocent_Contig_7369	70	0.07914	416	0.9799
dDocent_Contig_12556	131	0.07914	416	0.9799
dDocent_Contig_36723	155	0.07933	415	0.9799
dDocent_Contig_37115	25	0.07946	408	0.9799
dDocent_Contig_31746	256	0.07946	408	0.9799
dDocent_Contig_21856	91	0.07946	408	0.9799
dDocent_Contig_817	246	0.07966	407	0.9799
dDocent_Contig_3703	80	0.07966	407	0.9799
dDocent_Contig_10129	111	0.07966	407	0.9799
dDocent_Contig_47	180	0.07966	407	0.9799
dDocent_Contig_42468	175	0.07971	413	0.9799
dDocent_Contig_47718	162	0.07985	406	0.9799
dDocent_Contig_38103	88	0.07985	406	0.9799
dDocent_Contig_6971	256	0.07985	406	0.9799
dDocent_Contig_3937	96	0.07985	406	0.9799
dDocent_Contig_1842	255	0.0799	412	0.9799
dDocent_Contig_25162	80	0.0799	412	0.9799
dDocent_Contig_33345	64	0.08005	405	0.9799
dDocent_Contig_31469	225	0.0801	411	0.9799
dDocent_Contig_23062	273	0.08025	404	0.9799
dDocent_Contig_53598	209	0.08025	404	0.9799
dDocent_Contig_1151	230	0.08025	404	0.9799
dDocent_Contig_26921	124	0.08025	404	0.9799
dDocent_Contig_22680	177	0.08025	404	0.9799
dDocent_Contig_2091	266	0.08029	410	0.9799
dDocent_Contig_15347	189	0.08029	410	0.9799
dDocent_Contig_3109	276	0.08045	403	0.9799
dDocent_Contig_5394	59	0.08049	409	0.9799
dDocent_Contig_19409	15	0.08065	402	0.9799
dDocent_Contig_5305	18	0.08065	402	0.9799
dDocent_Contig_11416	255	0.08085	401	0.9799
dDocent_Contig_9158	54	0.08085	401	0.9799
dDocent_Contig_32164	28	0.08085	401	0.9799
dDocent_Contig_9637	57	0.08085	401	0.9799
dDocent_Contig_8217	77	0.08088	407	0.9799
dDocent_Contig_28777	51	0.08088	407	0.9799
dDocent_Contig_14758	205	0.08108	406	0.9799
dDocent_Contig_2390	213	0.08108	406	0.9799
dDocent_Contig_20606	129	0.08108	406	0.9799
dDocent_Contig_50741	24	0.08125	399	0.9799
dDocent_Contig_9973	115	0.08125	399	0.9799
dDocent_Contig_6772	189	0.08125	399	0.9799
dDocent_Contig_23481	85	0.08125	399	0.9799
dDocent_Contig_12564	188	0.08125	399	0.9799
dDocent_Contig_12294	254	0.08125	399	0.9799
dDocent_Contig_12104	240	0.08142	392	0.9799
dDocent_Contig_8959	21	0.08145	398	0.9799
dDocent_Contig_17603	93	0.08145	398	0.9799
dDocent_Contig_27044	196	0.08148	404	0.9799
dDocent_Contig_8310	106	0.08163	391	0.9799
dDocent_Contig_42225	294	0.08168	403	0.9799
dDocent_Contig_10655	74	0.08168	403	0.9799
dDocent_Contig_23563	13	0.08184	390	0.9799
dDocent_Contig_32493	130	0.08184	390	0.9799
dDocent_Contig_34862	245	0.08184	390	0.9799
dDocent_Contig_25871	221	0.08186	396	0.9799
dDocent_Contig_10483	67	0.08189	402	0.9799
dDocent_Contig_20592	38	0.08189	402	0.9799
dDocent_Contig_20592	75	0.08189	402	0.9799
dDocent_Contig_9895	266	0.08205	389	0.9799
dDocent_Contig_34572	124	0.08205	389	0.9799
dDocent_Contig_53421	235	0.08205	389	0.9799
dDocent_Contig_8665	134	0.08205	389	0.9799
dDocent_Contig_23596	272	0.08205	389	0.9799
dDocent_Contig_47165	38	0.08205	389	0.9799
dDocent_Contig_2202	209	0.08205	389	0.9799
dDocent_Contig_27929	184	0.08205	389	0.9799
dDocent_Contig_33307	261	0.08207	395	0.9799
dDocent_Contig_16047	232	0.08207	395	0.9799
dDocent_Contig_5378	174	0.08207	395	0.9799
dDocent_Contig_11136	141	0.08207	395	0.9799
dDocent_Contig_30432	252	0.08209	401	0.9799
dDocent_Contig_37585	193	0.08226	388	0.9799
dDocent_Contig_21835	173	0.08226	388	0.9799
dDocent_Contig_9068	14	0.08229	400	0.9799
dDocent_Contig_25447	164	0.08247	387	0.9799
dDocent_Contig_1571	222	0.08247	387	0.9799
dDocent_Contig_42632	280	0.08247	387	0.9799
dDocent_Contig_5267	41	0.08247	387	0.9799
dDocent_Contig_18787	82	0.08247	387	0.9799
dDocent_Contig_18559	179	0.08247	387	0.9799
dDocent_Contig_15209	37	0.08249	393	0.9799
dDocent_Contig_38779	276	0.08249	393	0.9799
dDocent_Contig_7237	181	0.0825	399	0.9799
dDocent_Contig_7237	193	0.0825	399	0.9799
dDocent_Contig_11650	190	0.08269	386	0.9799
dDocent_Contig_13060	82	0.08269	386	0.9799
dDocent_Contig_11010	135	0.08291	397	0.9799
dDocent_Contig_11010	240	0.08291	397	0.9799
dDocent_Contig_33680	258	0.08291	391	0.9799
dDocent_Contig_12479	124	0.08291	391	0.9799
[truncated: 24,576 more rows]

## Sheet: S2c A.dowei imcompatible morphs
#Supplementary Table S2c. RADtags in Anableps dowei and their association with the direction of genital asymmetry based on PLINK considering incompatible morphs (i.e. males with their gonopodium bending to the left and females with the foricula of the gonopore opening to the left).
#Columns A-E: output of the association mapping conducted in PLINK.
# CHR: RADtag name. RADtags were named by using the dDocent generated ID.
# SNP: The SNP ID referst to the physical position of the allelic variation in the specific RADtag
# perm.adj.P-value: Empirical p-value obtained from an adaptive permutation test based on the most significant result of ALLELIC, DOM and REC models
# NP: number of permutation replicas conducteed to determine EMP1
#p.BH.adj: P-value corrected for family-wise error for multiple testing using Benjamini-Hochberg false discovery rate
CHR	SNP	perm.adj.P-value	NP	p.BH.adj
dDocent_Contig_10618	36	2.45e-05	1000000	0.6509
dDocent_Contig_41419	37	9.454e-05	375506	0.6729
dDocent_Contig_27775	114	0.000113	309843	0.6729
dDocent_Contig_4909	118	0.0001527	232449	0.6729
dDocent_Contig_35928	285	0.0001648	212410	0.6729
dDocent_Contig_25362	273	0.0001767	198021	0.6729
dDocent_Contig_1724	203	0.0001773	197427	0.6729
dDocent_Contig_9936	165	0.0002412	147178	0.7986
dDocent_Contig_18727	236	0.0002965	118028	0.7986
dDocent_Contig_15166	124	0.0003081	113612	0.7986
dDocent_Contig_1574	34	0.0003489	103169	0.7986
dDocent_Contig_32059	201	0.0003607	98411	0.7986
dDocent_Contig_52544	15	0.0004987	71189	1
dDocent_Contig_20547	176	0.0005718	61207	1
dDocent_Contig_6212	185	0.0006268	55842	1
dDocent_Contig_49134	102	0.0006428	54452	1
dDocent_Contig_54097	154	0.0007771	45037	1
dDocent_Contig_51870	13	0.0008018	43650	1
dDocent_Contig_14933	230	0.0008392	42303	1
dDocent_Contig_15166	67	0.000846	41372	1
dDocent_Contig_18847	97	0.0008624	40585	1
dDocent_Contig_18827	39	0.001134	30866	1
dDocent_Contig_2206	138	0.001171	29879	1
dDocent_Contig_7355	19	0.001186	29519	1
dDocent_Contig_10189	120	0.001241	28603	1
dDocent_Contig_55981	220	0.001313	26664	1
dDocent_Contig_8946	261	0.001434	24752	1
dDocent_Contig_423	202	0.001452	24452	1
dDocent_Contig_914	202	0.001479	23666	1
dDocent_Contig_6557	201	0.001479	24002	1
dDocent_Contig_26012	254	0.001542	22696	1
dDocent_Contig_40635	158	0.001574	22558	1
dDocent_Contig_24350	140	0.001633	21434	1
dDocent_Contig_28575	113	0.001654	21456	1
dDocent_Contig_17847	258	0.001809	19348	1
dDocent_Contig_21392	83	0.001928	18153	1
dDocent_Contig_32838	184	0.001952	17929	1
dDocent_Contig_2308	257	0.002108	16603	1
dDocent_Contig_15197	221	0.002191	15976	1
dDocent_Contig_50452	250	0.002208	15848	1
dDocent_Contig_16163	258	0.002263	15464	1
dDocent_Contig_20715	78	0.002324	15272	1
dDocent_Contig_2656	122	0.002352	14880	1
dDocent_Contig_22620	64	0.002369	14775	1
dDocent_Contig_1228	10	0.00239	14850	1
dDocent_Contig_4552	100	0.002435	14370	1
dDocent_Contig_10732	254	0.002453	14265	1
dDocent_Contig_23363	257	0.002477	14130	1
dDocent_Contig_2922	188	0.002478	14325	1
dDocent_Contig_2922	204	0.002478	14325	1
dDocent_Contig_15997	189	0.002507	14160	1
dDocent_Contig_11820	269	0.002554	13702	1
dDocent_Contig_5979	217	0.002562	13856	1
dDocent_Contig_34504	154	0.002631	13492	1
dDocent_Contig_1180	278	0.002638	13268	1
dDocent_Contig_25548	244	0.002772	12625	1
dDocent_Contig_13057	231	0.002952	11857	1
dDocent_Contig_18117	212	0.003	11665	1
dDocent_Contig_18096	45	0.003028	11557	1
dDocent_Contig_18096	81	0.003028	11557	1
dDocent_Contig_18096	87	0.003028	11557	1
dDocent_Contig_13045	217	0.003086	11341	1
dDocent_Contig_13045	262	0.003086	11341	1
dDocent_Contig_12136	48	0.00313	11341	1
dDocent_Contig_12556	131	0.00317	11197	1
dDocent_Contig_8984	206	0.00319	10972	1
dDocent_Contig_20495	233	0.003222	10862	1
dDocent_Contig_19502	152	0.003245	10785	1
dDocent_Contig_835	131	0.003299	10609	1
dDocent_Contig_32949	249	0.003353	10587	1
dDocent_Contig_24651	14	0.003408	10268	1
dDocent_Contig_3960	86	0.00345	10290	1
dDocent_Contig_30402	55	0.003456	10125	1
dDocent_Contig_47185	280	0.003512	9964	1
dDocent_Contig_48319	141	0.00353	9914	1
dDocent_Contig_20308	9	0.003537	9894	1
dDocent_Contig_30371	15	0.003747	9474	1
dDocent_Contig_46290	236	0.003749	9334	1
dDocent_Contig_44085	8	0.00384	9114	1
dDocent_Contig_17103	10	0.003857	9074	1
dDocent_Contig_29222	192	0.003895	9114	1
dDocent_Contig_34396	28	0.003926	8914	1
dDocent_Contig_37033	49	0.003934	8896	1
dDocent_Contig_10139	98	0.00397	8815	1
dDocent_Contig_16533	162	0.003974	8806	1
dDocent_Contig_6452	51	0.004011	8725	1
dDocent_Contig_9558	133	0.004023	8698	1
dDocent_Contig_274	208	0.004128	8599	1
dDocent_Contig_6189	271	0.004145	8563	1
dDocent_Contig_23675	19	0.004161	8410	1
dDocent_Contig_178	87	0.004333	8077	1
dDocent_Contig_47201	98	0.004357	8032	1
dDocent_Contig_40586	78	0.004411	7933	1
dDocent_Contig_24305	111	0.004498	7781	1
dDocent_Contig_12526	84	0.004636	7549	1
dDocent_Contig_2093	139	0.004648	7637	1
dDocent_Contig_11405	64	0.004651	7525	1
dDocent_Contig_7654	213	0.004653	7629	1
dDocent_Contig_24478	127	0.004677	7589	1
dDocent_Contig_32375	136	0.00468	7477	1
dDocent_Contig_32375	191	0.00468	7477	1
dDocent_Contig_32269	30	0.004799	7397	1
dDocent_Contig_32389	99	0.004836	7237	1
dDocent_Contig_43382	286	0.004836	7237	1
dDocent_Contig_38117	65	0.004868	7189	1
dDocent_Contig_32269	68	0.004916	7221	1
dDocent_Contig_27036	190	0.00499	7013	1
dDocent_Contig_27143	101	0.005001	6998	1
dDocent_Contig_42355	174	0.005067	6907	1
dDocent_Contig_21453	183	0.005113	6942	1
dDocent_Contig_8002	194	0.005124	6830	1
dDocent_Contig_10675	42	0.005286	6620	1
dDocent_Contig_9120	227	0.005314	6585	1
dDocent_Contig_740	283	0.005331	6564	1
dDocent_Contig_36321	94	0.00536	6529	1
dDocent_Contig_4034	282	0.005383	6501	1
dDocent_Contig_16244	187	0.005383	6501	1
dDocent_Contig_18428	15	0.005383	6501	1
dDocent_Contig_37874	242	0.005489	6375	1
dDocent_Contig_31191	211	0.005495	6459	1
dDocent_Contig_2219	171	0.005556	6298	1
dDocent_Contig_45930	179	0.005632	6214	1
dDocent_Contig_601	118	0.005663	6179	1
dDocent_Contig_52449	241	0.005788	6046	1
dDocent_Contig_16235	177	0.005996	5920	1
dDocent_Contig_1168	189	0.006158	5764	1
dDocent_Contig_5077	118	0.00624	5608	1
dDocent_Contig_29688	231	0.006369	5494	1
dDocent_Contig_52410	266	0.006411	5458	1
dDocent_Contig_38779	276	0.006475	5482	1
dDocent_Contig_36057	247	0.006503	5458	1
dDocent_Contig_12412	225	0.006526	5362	1
dDocent_Contig_16696	195	0.006623	5284	1
dDocent_Contig_25621	89	0.006729	5200	1
dDocent_Contig_1147	61	0.006763	5248	1
dDocent_Contig_44953	93	0.006856	5104	1
dDocent_Contig_9271	168	0.006954	5032	1
dDocent_Contig_34396	187	0.007017	4987	1
dDocent_Contig_6969	276	0.007227	4842	1
dDocent_Contig_41092	256	0.007297	4727	1
dDocent_Contig_2465	28	0.00732	4712	1
dDocent_Contig_11713	125	0.007328	4707	1
dDocent_Contig_56735	82	0.007399	4662	1
dDocent_Contig_27762	131	0.007407	4657	1
dDocent_Contig_16671	62	0.007447	4632	1
dDocent_Contig_32334	12	0.007447	4632	1
dDocent_Contig_15388	135	0.007479	4612	1
dDocent_Contig_3062	125	0.007487	4607	1
dDocent_Contig_24065	48	0.007544	4572	1
dDocent_Contig_7384	179	0.007569	4557	1
dDocent_Contig_14082	124	0.007602	4537	1
dDocent_Contig_14082	130	0.007602	4537	1
dDocent_Contig_41275	222	0.007636	4517	1
dDocent_Contig_4202	185	0.007645	4512	1
dDocent_Contig_5069	239	0.007704	4477	1
dDocent_Contig_33003	165	0.007755	4512	1
dDocent_Contig_33003	182	0.007755	4512	1
dDocent_Contig_43749	126	0.007809	4417	1
dDocent_Contig_19513	23	0.007816	4477	1
dDocent_Contig_16010	57	0.007825	4472	1
dDocent_Contig_17156	226	0.007836	4402	1
dDocent_Contig_28210	124	0.007907	4362	1
dDocent_Contig_22078	109	0.007926	4352	1
dDocent_Contig_19926	100	0.00799	4317	1
dDocent_Contig_16807	223	0.008121	4247	1
dDocent_Contig_133	232	0.008181	4277	1
dDocent_Contig_33079	219	0.00822	4257	1
dDocent_Contig_10294	30	0.008228	4192	1
dDocent_Contig_9486	274	0.008229	4252	1
dDocent_Contig_50602	8	0.008357	4187	1
dDocent_Contig_30731	113	0.008419	4097	1
dDocent_Contig_4117	177	0.008439	4087	1
dDocent_Contig_12180	114	0.008458	4137	1
dDocent_Contig_5605	180	0.008608	4007	1
dDocent_Contig_4981	263	0.008619	4002	1
dDocent_Contig_15541	263	0.008625	4057	1
dDocent_Contig_6808	66	0.008732	3950	1
dDocent_Contig_6808	230	0.008732	3950	1
dDocent_Contig_37033	216	0.008752	3998	1
dDocent_Contig_53954	215	0.008787	3982	1
dDocent_Contig_5132	124	0.008886	3938	1
dDocent_Contig_7425	62	0.008903	3874	1
dDocent_Contig_3215	67	0.008904	3930	1
dDocent_Contig_12528	95	0.009043	3814	1
dDocent_Contig_6969	90	0.00906	3862	1
dDocent_Contig_16843	246	0.00912	3782	1
dDocent_Contig_45277	183	0.009129	3778	1
dDocent_Contig_362	270	0.009136	3830	1
dDocent_Contig_25940	53	0.009139	3774	1
dDocent_Contig_33031	171	0.009217	3742	1
dDocent_Contig_29089	11	0.009262	3778	1
dDocent_Contig_16317	38	0.009401	3722	1
dDocent_Contig_39670	134	0.009411	3718	1
dDocent_Contig_29202	12	0.009431	3710	1
dDocent_Contig_29202	30	0.009431	3710	1
dDocent_Contig_29202	43	0.009431	3710	1
dDocent_Contig_29202	52	0.009431	3710	1
dDocent_Contig_29202	57	0.009431	3710	1
dDocent_Contig_29202	66	0.009431	3710	1
dDocent_Contig_29202	74	0.009431	3710	1
dDocent_Contig_21641	288	0.009462	3698	1
dDocent_Contig_30814	91	0.009493	3686	1
dDocent_Contig_27375	267	0.009597	3646	1
dDocent_Contig_947	183	0.009607	3590	1
dDocent_Contig_362	268	0.009969	3510	1
dDocent_Contig_30389	52	0.009986	3454	1
dDocent_Contig_50434	178	0.009991	3502	1
dDocent_Contig_25082	190	0.009997	3450	1
dDocent_Contig_22334	182	0.01	3498	1
dDocent_Contig_30402	138	0.01002	3442	1
dDocent_Contig_3019	206	0.01009	3418	1
dDocent_Contig_41844	176	0.01015	3498	1
dDocent_Contig_20141	61	0.01022	3374	1
dDocent_Contig_29000	96	0.01023	3370	1
dDocent_Contig_9632	52	0.01025	3414	1
dDocent_Contig_14769	56	0.01046	3298	1
dDocent_Contig_21404	233	0.01046	3298	1
dDocent_Contig_9854	191	0.01048	3338	1
dDocent_Contig_8616	230	0.01052	3278	1
dDocent_Contig_43038	80	0.01053	3274	1
dDocent_Contig_13825	262	0.01058	3306	1
dDocent_Contig_10352	210	0.01061	3250	1
dDocent_Contig_21124	211	0.01061	3250	1
dDocent_Contig_5840	133	0.01066	3234	1
dDocent_Contig_23152	195	0.01068	3230	1
dDocent_Contig_17996	20	0.01069	3274	1
dDocent_Contig_22408	158	0.01073	3214	1
dDocent_Contig_24173	113	0.01081	3190	1
dDocent_Contig_19676	157	0.01083	3186	1
dDocent_Contig_24685	90	0.01083	3186	1
dDocent_Contig_24685	97	0.01083	3186	1
dDocent_Contig_19313	281	0.01087	3174	1
dDocent_Contig_14131	159	0.01088	3170	1
dDocent_Contig_47310	15	0.01098	3186	1
dDocent_Contig_11337	203	0.01103	3126	1
dDocent_Contig_22288	242	0.01112	3146	1
dDocent_Contig_29194	221	0.01114	3142	1
dDocent_Contig_3942	207	0.01118	3130	1
dDocent_Contig_127	166	0.01119	3082	1
dDocent_Contig_12578	55	0.01123	3070	1
dDocent_Contig_2138	207	0.01126	3062	1
dDocent_Contig_25662	40	0.01126	3062	1
dDocent_Contig_47025	39	0.01143	3018	1
dDocent_Contig_17432	195	0.01147	3006	1
dDocent_Contig_12564	159	0.01149	3002	1
dDocent_Contig_601	29	0.01153	2990	1
dDocent_Contig_5517	266	0.01155	2987	1
dDocent_Contig_26978	34	0.01157	2981	1
dDocent_Contig_4440	217	0.01164	3006	1
dDocent_Contig_4440	218	0.01164	3006	1
dDocent_Contig_3099	51	0.01175	2978	1
dDocent_Contig_3217	61	0.01176	2933	1
dDocent_Contig_3942	185	0.01184	2954	1
dDocent_Contig_23115	182	0.01184	2954	1
dDocent_Contig_19982	195	0.01194	2888	1
dDocent_Contig_32230	15	0.01199	2876	1
dDocent_Contig_22374	28	0.012	2873	1
dDocent_Contig_274	260	0.01202	2870	1
dDocent_Contig_6614	131	0.0121	2891	1
dDocent_Contig_12533	134	0.0121	2933	1
dDocent_Contig_14544	9	0.01213	2843	1
dDocent_Contig_43699	276	0.01222	2822	1
dDocent_Contig_4305	235	0.01227	2852	1
dDocent_Contig_35184	119	0.0123	2804	1
dDocent_Contig_56033	160	0.01233	2798	1
dDocent_Contig_13894	49	0.01244	2813	1
dDocent_Contig_36724	25	0.01245	2810	1
dDocent_Contig_1232	288	0.01249	2762	1
dDocent_Contig_40326	212	0.0125	2798	1
dDocent_Contig_18987	114	0.01256	2786	1
dDocent_Contig_7835	283	0.01261	2774	1
dDocent_Contig_14357	72	0.01263	2771	1
dDocent_Contig_5791	172	0.01264	2729	1
dDocent_Contig_27356	90	0.01268	2720	1
dDocent_Contig_15949	33	0.01275	2705	1
dDocent_Contig_49300	282	0.01281	2693	1
dDocent_Contig_22063	29	0.01295	2663	1
dDocent_Contig_22063	98	0.01295	2663	1
dDocent_Contig_1180	272	0.01297	2660	1
dDocent_Contig_35765	31	0.01315	2660	1
dDocent_Contig_4526	169	0.01334	2585	1
dDocent_Contig_4526	233	0.01334	2585	1
dDocent_Contig_19762	255	0.01339	2576	1
dDocent_Contig_52461	157	0.0134	2573	1
dDocent_Contig_25406	86	0.01358	2576	1
dDocent_Contig_17644	163	0.01364	2528	1
dDocent_Contig_11111	266	0.01366	2525	1
dDocent_Contig_22408	22	0.01386	2525	1
dDocent_Contig_3402	81	0.01387	2522	1
dDocent_Contig_13631	274	0.01392	2477	1
dDocent_Contig_17543	55	0.01402	2459	1
dDocent_Contig_42566	68	0.01407	2486	1
dDocent_Contig_43721	22	0.01411	2480	1
dDocent_Contig_16447	271	0.01415	2438	1
dDocent_Contig_13840	198	0.01416	2435	1
dDocent_Contig_1065	72	0.01418	2468	1
dDocent_Contig_2554	102	0.01418	2468	1
dDocent_Contig_43779	245	0.0142	2429	1
dDocent_Contig_21051	222	0.01423	2423	1
dDocent_Contig_46766	94	0.01434	2405	1
dDocent_Contig_24789	157	0.01443	2390	1
dDocent_Contig_1905	262	0.01445	2387	1
dDocent_Contig_41824	96	0.01446	2420	1
dDocent_Contig_24383	30	0.01447	2384	1
dDocent_Contig_55220	90	0.01462	2393	1
dDocent_Contig_41357	273	0.01463	2357	1
dDocent_Contig_26709	186	0.01465	2354	1
dDocent_Contig_20789	249	0.01469	2381	1
dDocent_Contig_638	230	0.01471	2378	1
dDocent_Contig_25609	52	0.01471	2345	1
dDocent_Contig_25621	244	0.01472	2342	1
dDocent_Contig_43122	228	0.01475	2372	1
dDocent_Contig_12876	187	0.01476	2336	1
dDocent_Contig_19274	279	0.01476	2336	1
dDocent_Contig_50063	208	0.01479	2366	1
dDocent_Contig_21733	267	0.01492	2345	1
dDocent_Contig_27017	277	0.01494	2342	1
dDocent_Contig_1844	128	0.01496	2339	1
dDocent_Contig_5759	67	0.01498	2336	1
dDocent_Contig_13313	231	0.01498	2336	1
dDocent_Contig_43273	165	0.01501	2297	1
dDocent_Contig_17518	35	0.01503	2294	1
dDocent_Contig_30129	198	0.01511	2315	1
dDocent_Contig_31845	154	0.01513	2279	1
dDocent_Contig_33299	171	0.01517	2306	1
dDocent_Contig_29897	195	0.01525	2294	1
dDocent_Contig_12889	182	0.01533	2282	1
dDocent_Contig_15720	211	0.01535	2246	1
dDocent_Contig_11659	253	0.01539	2273	1
dDocent_Contig_3883	215	0.01541	2270	1
dDocent_Contig_17156	103	0.01542	2237	1
dDocent_Contig_6796	117	0.01543	2267	1
dDocent_Contig_16296	21	0.01543	2267	1
dDocent_Contig_984	259	0.01545	2264	1
dDocent_Contig_42632	207	0.01548	2324	1
dDocent_Contig_29079	106	0.01554	2219	1
dDocent_Contig_43561	71	0.01556	2249	1
dDocent_Contig_39326	259	0.01581	2213	1
dDocent_Contig_12915	239	0.01593	2165	1
dDocent_Contig_54226	233	0.01604	2150	1
dDocent_Contig_44299	152	0.01605	2180	1
dDocent_Contig_12032	104	0.01608	2144	1
dDocent_Contig_14082	200	0.01613	2138	1
dDocent_Contig_42114	194	0.01618	2162	1
dDocent_Contig_24426	243	0.0162	2129	1
dDocent_Contig_7070	123	0.01627	2120	1
dDocent_Contig_50545	78	0.01631	2114	1
dDocent_Contig_5485	113	0.01634	2111	1
dDocent_Contig_6596	263	0.01636	2108	1
dDocent_Contig_38305	45	0.01645	2096	1
dDocent_Contig_7164	189	0.01648	2123	1
dDocent_Contig_8221	247	0.01648	2093	1
dDocent_Contig_10426	98	0.01652	2087	1
dDocent_Contig_11060	158	0.01655	2084	1
dDocent_Contig_41514	284	0.01655	2084	1
dDocent_Contig_46366	159	0.01657	2081	1
dDocent_Contig_28333	83	0.01659	2078	1
dDocent_Contig_13429	32	0.01667	2099	1
dDocent_Contig_16690	53	0.01667	2069	1
dDocent_Contig_6941	281	0.01679	2054	1
dDocent_Contig_31934	78	0.01691	2039	1
dDocent_Contig_26777	65	0.01696	2033	1
dDocent_Contig_5666	54	0.01701	2057	1
dDocent_Contig_22594	114	0.01701	2057	1
dDocent_Contig_19616	127	0.01708	2048	1
dDocent_Contig_8774	194	0.01713	2042	1
dDocent_Contig_43978	264	0.01714	2099	1
dDocent_Contig_395	65	0.01726	1998	1
dDocent_Contig_28353	165	0.01726	1998	1
dDocent_Contig_13410	91	0.01728	2024	1
dDocent_Contig_37523	32	0.01729	1994	1
dDocent_Contig_10189	62	0.0174	1982	1
dDocent_Contig_24357	135	0.01745	1976	1
dDocent_Contig_10600	15	0.0175	1970	1
dDocent_Contig_15033	69	0.0175	1970	1
dDocent_Contig_26602	175	0.01756	1964	1
dDocent_Contig_35498	283	0.01763	1984	1
dDocent_Contig_4081	55	0.0177	1948	1
dDocent_Contig_22860	193	0.01777	1940	1
dDocent_Contig_35543	42	0.01777	1940	1
dDocent_Contig_35543	197	0.01777	1940	1
dDocent_Contig_18631	130	0.01781	1936	1
dDocent_Contig_23793	174	0.01783	1934	1
dDocent_Contig_25024	67	0.01785	1932	1
dDocent_Contig_38738	206	0.01787	1930	1
dDocent_Contig_26565	135	0.018	1916	1
dDocent_Contig_22789	230	0.01801	1942	1
dDocent_Contig_52220	233	0.01802	1914	1
dDocent_Contig_7580	249	0.01809	1906	1
dDocent_Contig_2745	75	0.01817	1898	1
dDocent_Contig_9271	161	0.01821	1894	1
dDocent_Contig_21424	43	0.01823	1892	1
dDocent_Contig_45219	97	0.0183	1912	1
dDocent_Contig_1163	8	0.01841	1900	1
dDocent_Contig_27157	235	0.01844	1870	1
dDocent_Contig_6092	91	0.01845	1896	1
dDocent_Contig_14858	68	0.01858	1856	1
dDocent_Contig_10464	52	0.01879	1862	1
dDocent_Contig_6509	163	0.01882	1832	1
dDocent_Contig_10226	152	0.01882	1832	1
dDocent_Contig_13949	140	0.01888	1826	1
dDocent_Contig_41357	283	0.01888	1826	1
dDocent_Contig_16646	114	0.01889	1852	1
dDocent_Contig_26013	48	0.0189	1824	1
dDocent_Contig_26013	270	0.0189	1824	1
dDocent_Contig_54439	285	0.01892	1822	1
dDocent_Contig_2473	115	0.01893	1848	1
dDocent_Contig_10164	87	0.01895	1846	1
dDocent_Contig_18614	182	0.01895	1846	1
dDocent_Contig_37289	111	0.01909	1832	1
dDocent_Contig_12334	105	0.01946	1772	1
dDocent_Contig_32200	141	0.01946	1798	1
dDocent_Contig_23022	245	0.01952	1766	1
dDocent_Contig_4574	47	0.01954	1790	1
dDocent_Contig_7950	138	0.01955	1764	1
dDocent_Contig_23976	89	0.01955	1764	1
dDocent_Contig_35027	110	0.01955	1764	1
dDocent_Contig_20291	287	0.01957	1762	1
dDocent_Contig_6073	174	0.01966	1754	1
dDocent_Contig_20107	240	0.01966	1754	1
dDocent_Contig_20215	54	0.01967	1778	1
dDocent_Contig_6498	134	0.01968	1752	1
dDocent_Contig_34903	80	0.0197	1776	1
dDocent_Contig_49714	14	0.01973	1748	1
dDocent_Contig_24477	170	0.01975	1746	1
dDocent_Contig_39793	257	0.01984	1738	1
dDocent_Contig_43446	183	0.01984	1738	1
dDocent_Contig_11065	299	0.01998	1726	1
dDocent_Contig_20811	270	0.01999	1750	1
dDocent_Contig_4526	154	0.02016	1710	1
dDocent_Contig_6877	245	0.02021	1706	1
dDocent_Contig_19877	245	0.02028	1700	1
dDocent_Contig_27082	82	0.02043	1688	1
dDocent_Contig_10928	206	0.02045	1686	1
dDocent_Contig_19214	39	0.02048	1732	1
dDocent_Contig_8248	102	0.0205	1706	1
dDocent_Contig_3239	24	0.02072	1664	1
dDocent_Contig_24832	213	0.02072	1688	1
dDocent_Contig_44597	129	0.02075	1662	1
dDocent_Contig_5526	106	0.02077	1660	1
dDocent_Contig_5796	75	0.0208	1658	1
dDocent_Contig_15991	176	0.0209	1674	1
dDocent_Contig_8607	101	0.021	1642	1
dDocent_Contig_50843	124	0.021	1666	1
dDocent_Contig_12520	180	0.02102	1640	1
dDocent_Contig_24494	25	0.02102	1640	1
dDocent_Contig_44523	190	0.02102	1664	1
dDocent_Contig_9014	112	0.02113	1632	1
dDocent_Contig_8343	41	0.02115	1630	1
dDocent_Contig_21180	75	0.02115	1654	1
dDocent_Contig_49894	31	0.02115	1630	1
dDocent_Contig_29202	129	0.02123	1624	1
dDocent_Contig_16317	277	0.02142	1610	1
dDocent_Contig_9679	119	0.02147	1606	1
dDocent_Contig_19659	275	0.0215	1604	1
dDocent_Contig_2308	29	0.02158	1598	1
dDocent_Contig_8267	23	0.02177	1584	1
dDocent_Contig_8267	36	0.02177	1584	1
dDocent_Contig_4450	285	0.02178	1606	1
dDocent_Contig_16289	261	0.02196	1570	1
dDocent_Contig_38477	86	0.02196	1570	1
dDocent_Contig_37033	243	0.022	1590	1
dDocent_Contig_4085	71	0.02214	1580	1
dDocent_Contig_22825	87	0.02214	1580	1
dDocent_Contig_14283	73	0.02216	1556	1
dDocent_Contig_13220	171	0.02217	1578	1
dDocent_Contig_13220	179	0.02217	1578	1
dDocent_Contig_45432	155	0.02221	1530	1
dDocent_Contig_9581	244	0.02222	1574	1
dDocent_Contig_1467	189	0.02225	1572	1
dDocent_Contig_2239	290	0.02227	1526	1
dDocent_Contig_3889	124	0.0223	1546	1
dDocent_Contig_21734	168	0.02235	1520	1
dDocent_Contig_24305	24	0.02238	1518	1
dDocent_Contig_8044	198	0.02245	1536	1
dDocent_Contig_23728	209	0.02248	1556	1
dDocent_Contig_5511	87	0.0225	1532	1
dDocent_Contig_16021	116	0.02253	1530	1
dDocent_Contig_631	19	0.02259	1526	1
dDocent_Contig_1061	9	0.02262	1502	1
dDocent_Contig_4565	54	0.02262	1502	1
dDocent_Contig_40732	27	0.02265	1500	1
dDocent_Contig_12790	133	0.02268	1498	1
dDocent_Contig_37633	74	0.02271	1496	1
dDocent_Contig_12577	164	0.02274	1494	1
dDocent_Contig_14011	95	0.0228	1534	1
dDocent_Contig_18832	27	0.0228	1490	1
dDocent_Contig_44597	31	0.02283	1488	1
dDocent_Contig_4085	208	0.0229	1484	1
dDocent_Contig_11823	226	0.02296	1480	1
dDocent_Contig_22063	254	0.02296	1480	1
dDocent_Contig_38179	89	0.02296	1480	1
dDocent_Contig_37190	34	0.02299	1478	1
dDocent_Contig_15494	17	0.02311	1470	1
dDocent_Contig_28603	27	0.02318	1466	1
dDocent_Contig_28603	114	0.02318	1466	1
dDocent_Contig_29089	192	0.02321	1464	1
dDocent_Contig_33678	136	0.02324	1462	1
dDocent_Contig_37470	116	0.02327	1460	1
dDocent_Contig_39959	112	0.0233	1458	1
dDocent_Contig_20591	286	0.02333	1478	1
dDocent_Contig_45425	202	0.02336	1476	1
dDocent_Contig_43922	228	0.0235	1446	1
dDocent_Contig_7533	35	0.02366	1436	1
dDocent_Contig_25033	116	0.02371	1454	1
dDocent_Contig_1120	127	0.02381	1448	1
dDocent_Contig_2016	203	0.02384	1446	1
dDocent_Contig_2016	230	0.02384	1446	1
dDocent_Contig_27802	79	0.02386	1424	1
dDocent_Contig_18669	244	0.02388	1444	1
dDocent_Contig_17630	208	0.02391	1442	1
dDocent_Contig_7320	243	0.02393	1420	1
dDocent_Contig_18434	216	0.02393	1420	1
dDocent_Contig_25619	243	0.02397	1438	1
dDocent_Contig_30060	220	0.02401	1436	1
dDocent_Contig_35839	19	0.02411	1430	1
dDocent_Contig_23470	173	0.02413	1408	1
dDocent_Contig_41106	21	0.02418	1426	1
dDocent_Contig_26425	170	0.02421	1424	1
dDocent_Contig_27735	161	0.02424	1422	1
dDocent_Contig_1317	153	0.02427	1400	1
dDocent_Contig_2146	69	0.02435	1416	1
dDocent_Contig_147	6	0.02442	1412	1
dDocent_Contig_16994	114	0.02456	1404	1
dDocent_Contig_2146	276	0.02458	1382	1
dDocent_Contig_9200	109	0.02459	1402	1
dDocent_Contig_3711	79	0.02463	1400	1
dDocent_Contig_17786	262	0.02463	1400	1
dDocent_Contig_10185	228	0.02466	1398	1
dDocent_Contig_30104	209	0.02466	1398	1
dDocent_Contig_23194	9	0.02473	1374	1
dDocent_Contig_37041	203	0.02476	1372	1
dDocent_Contig_52925	13	0.02477	1392	1
dDocent_Contig_14333	216	0.0248	1390	1
dDocent_Contig_2568	205	0.02491	1364	1
dDocent_Contig_8688	91	0.02491	1364	1
dDocent_Contig_9441	23	0.02491	1364	1
dDocent_Contig_29798	9	0.02498	1380	1
dDocent_Contig_11948	187	0.02502	1378	1
dDocent_Contig_15038	176	0.02506	1356	1
dDocent_Contig_37817	71	0.02509	1374	1
dDocent_Contig_43817	252	0.02509	1354	1
dDocent_Contig_28726	123	0.02513	1352	1
dDocent_Contig_18669	37	0.02516	1370	1
dDocent_Contig_891	85	0.02523	1406	1
dDocent_Contig_10449	276	0.02524	1346	1
dDocent_Contig_14082	69	0.02524	1346	1
dDocent_Contig_7457	193	0.02535	1340	1
dDocent_Contig_23017	111	0.02535	1340	1
dDocent_Contig_8804	7	0.02546	1354	1
dDocent_Contig_8368	45	0.02547	1334	1
dDocent_Contig_8248	124	0.02551	1332	1
dDocent_Contig_42669	219	0.02551	1332	1
dDocent_Contig_19360	278	0.02554	1330	1
dDocent_Contig_7533	15	0.02557	1348	1
dDocent_Contig_18537	122	0.02561	1346	1
dDocent_Contig_21824	159	0.02561	1346	1
dDocent_Contig_49081	132	0.02565	1344	1
dDocent_Contig_8982	101	0.02574	1320	1
dDocent_Contig_43300	66	0.02574	1320	1
dDocent_Contig_10072	183	0.02586	1314	1
dDocent_Contig_10622	285	0.02592	1330	1
dDocent_Contig_4483	171	0.02593	1310	1
dDocent_Contig_21746	176	0.02597	1308	1
dDocent_Contig_50263	73	0.02597	1308	1
dDocent_Contig_28603	196	0.026	1326	1
dDocent_Contig_37858	22	0.02601	1306	1
dDocent_Contig_37858	55	0.02601	1306	1
dDocent_Contig_21824	64	0.02605	1304	1
dDocent_Contig_16956	53	0.02612	1320	1
dDocent_Contig_11948	221	0.02616	1318	1
dDocent_Contig_31978	257	0.02618	1336	1
dDocent_Contig_13816	12	0.0263	1292	1
dDocent_Contig_15056	246	0.02644	1304	1
dDocent_Contig_37521	205	0.02644	1304	1
dDocent_Contig_51550	10	0.02646	1284	1
dDocent_Contig_19482	64	0.02658	1278	1
dDocent_Contig_2887	88	0.02675	1270	1
dDocent_Contig_27639	178	0.02688	1264	1
dDocent_Contig_31066	244	0.02705	1256	1
dDocent_Contig_28270	121	0.02709	1254	1
dDocent_Contig_42715	155	0.0271	1272	1
dDocent_Contig_12945	19	0.02713	1252	1
dDocent_Contig_42738	258	0.02714	1270	1
dDocent_Contig_15503	177	0.02718	1250	1
dDocent_Contig_35948	184	0.02727	1246	1
dDocent_Contig_28206	157	0.02731	1244	1
dDocent_Contig_2020	271	0.02732	1262	1
dDocent_Contig_5593	242	0.02735	1242	1
dDocent_Contig_1175	194	0.02736	1260	1
dDocent_Contig_1175	223	0.02736	1260	1
dDocent_Contig_2693	9	0.02736	1260	1
dDocent_Contig_23219	31	0.0274	1258	1
dDocent_Contig_47878	69	0.02771	1226	1
dDocent_Contig_11611	159	0.02789	1218	1
dDocent_Contig_33261	156	0.02789	1218	1
dDocent_Contig_1284	42	0.02798	1232	1
dDocent_Contig_3698	124	0.02798	1214	1
dDocent_Contig_15126	69	0.02803	1212	1
dDocent_Contig_10369	35	0.02808	1210	1
dDocent_Contig_9827	152	0.02812	1208	1
dDocent_Contig_632	63	0.02826	1202	1
dDocent_Contig_11817	34	0.0283	1218	1
dDocent_Contig_35860	292	0.0283	1218	1
dDocent_Contig_29485	196	0.02831	1200	1
dDocent_Contig_8723	39	0.0284	1196	1
dDocent_Contig_36115	55	0.02844	1212	1
dDocent_Contig_4818	112	0.02858	1206	1
dDocent_Contig_8932	74	0.0286	1188	1
dDocent_Contig_36267	29	0.02868	1202	1
dDocent_Contig_22250	119	0.02873	1200	1
dDocent_Contig_42226	102	0.02874	1182	1
dDocent_Contig_35780	62	0.02884	1178	1
dDocent_Contig_47070	199	0.02889	1176	1
dDocent_Contig_2558	246	0.02894	1174	1
dDocent_Contig_21797	122	0.02897	1190	1
dDocent_Contig_17353	47	0.02899	1172	1
dDocent_Contig_18634	96	0.02899	1172	1
dDocent_Contig_51932	47	0.02902	1188	1
dDocent_Contig_4471	186	0.02904	1170	1
dDocent_Contig_21109	274	0.02908	1168	1
dDocent_Contig_7690	162	0.02913	1166	1
dDocent_Contig_16470	201	0.02913	1166	1
dDocent_Contig_12936	59	0.02918	1164	1
dDocent_Contig_35638	167	0.02918	1164	1
dDocent_Contig_52139	134	0.02918	1164	1
dDocent_Contig_24325	25	0.02921	1180	1
dDocent_Contig_1445	48	0.02926	1178	1
dDocent_Contig_2685	163	0.02929	1160	1
dDocent_Contig_2685	251	0.02929	1160	1
dDocent_Contig_25406	217	0.02929	1160	1
dDocent_Contig_34426	254	0.02936	1174	1
dDocent_Contig_17910	208	0.02939	1156	1
dDocent_Contig_36682	56	0.02939	1156	1
dDocent_Contig_25369	247	0.02944	1154	1
dDocent_Contig_12475	79	0.02954	1150	1
dDocent_Contig_50304	37	0.02954	1150	1
dDocent_Contig_8107	213	0.02964	1146	1
dDocent_Contig_26288	263	0.02964	1146	1
dDocent_Contig_6882	208	0.02975	1142	1
dDocent_Contig_11184	61	0.02975	1142	1
dDocent_Contig_9852	134	0.02987	1154	1
dDocent_Contig_10618	206	0.02992	1152	1
dDocent_Contig_719	10	0.03001	1132	1
dDocent_Contig_22514	36	0.03001	1132	1
dDocent_Contig_9381	190	0.03006	1130	1
dDocent_Contig_39645	85	0.03006	1130	1
dDocent_Contig_45495	36	0.03006	1130	1
dDocent_Contig_6991	13	0.03012	1128	1
dDocent_Contig_12995	160	0.03012	1128	1
dDocent_Contig_16447	100	0.03017	1126	1
dDocent_Contig_5542	85	0.03033	1120	1
dDocent_Contig_24352	249	0.03033	1120	1
dDocent_Contig_14624	214	0.0304	1134	1
dDocent_Contig_13259	232	0.03045	1132	1
dDocent_Contig_15541	186	0.03063	1158	1
dDocent_Contig_2568	173	0.03066	1108	1
dDocent_Contig_38114	165	0.03066	1108	1
dDocent_Contig_604	30	0.03067	1124	1
dDocent_Contig_689	81	0.03077	1104	1
dDocent_Contig_9577	209	0.03088	1100	1
dDocent_Contig_17183	76	0.03088	1100	1
dDocent_Contig_59245	279	0.03088	1100	1
dDocent_Contig_21855	89	0.03094	1114	1
dDocent_Contig_45473	164	0.03094	1098	1
dDocent_Contig_22819	92	0.03105	1110	1
dDocent_Contig_27308	133	0.03105	1110	1
dDocent_Contig_24810	38	0.03116	1090	1
dDocent_Contig_9476	9	0.03117	1106	1
dDocent_Contig_22197	291	0.03117	1106	1
dDocent_Contig_28902	198	0.03117	1106	1
dDocent_Contig_15147	279	0.03128	1102	1
dDocent_Contig_52968	71	0.03128	1102	1
dDocent_Contig_3163	236	0.03134	1084	1
dDocent_Contig_17739	278	0.03134	1084	1
dDocent_Contig_604	137	0.03139	1082	1
dDocent_Contig_38811	183	0.03139	1098	1
dDocent_Contig_11092	126	0.03145	1096	1
dDocent_Contig_15766	206	0.03145	1096	1
dDocent_Contig_27334	180	0.03145	1080	1
dDocent_Contig_32233	212	0.03145	1080	1
dDocent_Contig_16235	238	0.03151	1094	1
dDocent_Contig_18313	264	0.03151	1078	1
dDocent_Contig_18735	65	0.03156	1092	1
dDocent_Contig_12718	127	0.03157	1076	1
dDocent_Contig_15598	162	0.03157	1076	1
dDocent_Contig_44475	109	0.03168	1088	1
dDocent_Contig_5558	33	0.03169	1072	1
dDocent_Contig_57777	247	0.03174	1086	1
dDocent_Contig_57777	269	0.03174	1086	1
dDocent_Contig_16861	35	0.03175	1070	1
dDocent_Contig_19493	169	0.03187	1066	1
dDocent_Contig_1815	80	0.03191	1080	1
dDocent_Contig_5538	137	0.03203	1076	1
dDocent_Contig_30486	246	0.03205	1060	1
dDocent_Contig_38042	245	0.03211	1058	1
dDocent_Contig_631	305	0.03217	1056	1
dDocent_Contig_14153	37	0.03217	1056	1
dDocent_Contig_45166	189	0.03221	1070	1
dDocent_Contig_13682	33	0.03227	1068	1
dDocent_Contig_13795	50	0.03227	1068	1
dDocent_Contig_18172	125	0.03235	1050	1
dDocent_Contig_30416	16	0.03241	1048	1
dDocent_Contig_5966	277	0.03246	1062	1
dDocent_Contig_13000	253	0.03246	1062	1
dDocent_Contig_43779	275	0.03247	1046	1
dDocent_Contig_43779	288	0.03247	1046	1
dDocent_Contig_10551	74	0.03252	1060	1
dDocent_Contig_33885	154	0.03252	1060	1
dDocent_Contig_12502	216	0.0327	1054	1
dDocent_Contig_14976	7	0.03289	1048	1
dDocent_Contig_16911	173	0.03291	1032	1
dDocent_Contig_12136	187	0.03298	1030	1
dDocent_Contig_11417	92	0.03304	1028	1
dDocent_Contig_15267	218	0.03308	1042	1
dDocent_Contig_5369	54	0.03311	1026	1
dDocent_Contig_10098	257	0.03311	1026	1
dDocent_Contig_29519	126	0.03311	1026	1
dDocent_Contig_27697	178	0.03314	1040	1
dDocent_Contig_12849	189	0.03317	1024	1
dDocent_Contig_17657	182	0.03317	1024	1
dDocent_Contig_43998	138	0.03317	1024	1
dDocent_Contig_15119	139	0.03327	1036	1
dDocent_Contig_7379	158	0.0333	1020	1
dDocent_Contig_9373	193	0.03337	1018	1
dDocent_Contig_16088	197	0.03337	1018	1
dDocent_Contig_17153	13	0.03337	1018	1
dDocent_Contig_21095	186	0.03337	1018	1
dDocent_Contig_45047	164	0.03337	1018	1
dDocent_Contig_7442	46	0.0334	1032	1
dDocent_Contig_17530	48	0.0334	1032	1
dDocent_Contig_44681	223	0.0334	1032	1
dDocent_Contig_15225	229	0.03343	1016	1
dDocent_Contig_19882	79	0.03343	1016	1
dDocent_Contig_20901	161	0.03343	1016	1
dDocent_Contig_6509	247	0.0335	1014	1
dDocent_Contig_18274	209	0.03356	1012	1
dDocent_Contig_36462	158	0.03372	1022	1
dDocent_Contig_50967	245	0.03388	1032	1
dDocent_Contig_17322	52	0.0339	1002	1
dDocent_Contig_25491	111	0.03397	1000	1
dDocent_Contig_18050	125	0.03399	1014	1
dDocent_Contig_17652	42	0.034	999	1
dDocent_Contig_18735	163	0.03407	997	1
dDocent_Contig_5949	236	0.0341	996	1
dDocent_Contig_5605	110	0.03414	995	1
dDocent_Contig_30698	123	0.03419	1008	1
dDocent_Contig_1551	154	0.03421	993	1
dDocent_Contig_38664	73	0.03421	993	1
dDocent_Contig_429	269	0.03424	992	1
dDocent_Contig_36901	277	0.0344	1002	1
dDocent_Contig_47681	112	0.0345	999	1
dDocent_Contig_38228	179	0.03453	998	1
dDocent_Contig_31360	53	0.03455	983	1
dDocent_Contig_51306	61	0.03457	997	1
dDocent_Contig_11359	93	0.03459	982	1
dDocent_Contig_9531	270	0.03462	981	1
dDocent_Contig_6686	88	0.03464	995	1
dDocent_Contig_19309	26	0.03464	995	1
dDocent_Contig_4854	246	0.03469	979	1
dDocent_Contig_26475	226	0.03469	979	1
dDocent_Contig_18428	23	0.03476	977	1
dDocent_Contig_12144	255	0.03487	974	1
dDocent_Contig_515	98	0.03491	973	1
dDocent_Contig_32585	66	0.03491	973	1
dDocent_Contig_8340	229	0.03495	986	1
dDocent_Contig_32642	23	0.03505	969	1
dDocent_Contig_24050	197	0.03509	968	1
dDocent_Contig_49028	168	0.03523	964	1
dDocent_Contig_49028	173	0.03523	964	1
dDocent_Contig_49028	190	0.03523	964	1
dDocent_Contig_49028	199	0.03523	964	1
dDocent_Contig_49028	212	0.03523	964	1
dDocent_Contig_49028	241	0.03523	964	1
dDocent_Contig_49028	252	0.03523	964	1
dDocent_Contig_49028	262	0.03523	964	1
dDocent_Contig_49028	271	0.03523	964	1
dDocent_Contig_49028	280	0.03523	964	1
dDocent_Contig_12540	205	0.03534	961	1
dDocent_Contig_2572	180	0.03538	974	1
dDocent_Contig_47212	272	0.03538	960	1
dDocent_Contig_5830	291	0.03545	958	1
dDocent_Contig_15214	242	0.03545	958	1
dDocent_Contig_10166	16	0.03546	972	1
dDocent_Contig_22540	256	0.03553	956	1
dDocent_Contig_11942	87	0.03557	969	1
dDocent_Contig_11942	287	0.03557	969	1
dDocent_Contig_3265	163	0.0356	968	1
dDocent_Contig_10682	66	0.03564	953	1
dDocent_Contig_22599	54	0.03568	952	1
dDocent_Contig_10455	241	0.03586	947	1
dDocent_Contig_21437	203	0.03586	947	1
dDocent_Contig_21437	225	0.03586	947	1
dDocent_Contig_1082	107	0.0359	946	1
dDocent_Contig_5814	210	0.0359	946	1
dDocent_Contig_13290	175	0.03594	945	1
dDocent_Contig_14742	164	0.03602	943	1
dDocent_Contig_13031	278	0.03609	941	1
dDocent_Contig_18895	250	0.03613	940	1
dDocent_Contig_22731	55	0.03621	938	1
dDocent_Contig_19660	269	0.03629	936	1
dDocent_Contig_37193	271	0.03629	936	1
dDocent_Contig_49424	53	0.03629	936	1
dDocent_Contig_30273	276	0.03632	935	1
dDocent_Contig_58103	195	0.03636	934	1
dDocent_Contig_1418	214	0.0364	933	1
dDocent_Contig_17054	52	0.0364	933	1
dDocent_Contig_13834	136	0.03644	932	1
dDocent_Contig_7586	94	0.03652	930	1
dDocent_Contig_13872	285	0.03655	943	1
dDocent_Contig_14762	81	0.0366	928	1
dDocent_Contig_39119	184	0.0366	928	1
dDocent_Contig_1952	124	0.03664	927	1
dDocent_Contig_2472	215	0.0367	939	1
dDocent_Contig_20417	171	0.0368	923	1
dDocent_Contig_15770	206	0.03685	908	1
dDocent_Contig_602	239	0.03693	906	1
dDocent_Contig_1142	153	0.03693	906	1
dDocent_Contig_10437	192	0.03693	906	1
dDocent_Contig_11402	168	0.03693	906	1
dDocent_Contig_14125	125	0.03693	906	1
dDocent_Contig_7184	93	0.03698	905	1
dDocent_Contig_20616	193	0.03698	905	1
dDocent_Contig_41595	163	0.03698	905	1
dDocent_Contig_18812	154	0.037	918	1
dDocent_Contig_47235	190	0.037	918	1
dDocent_Contig_3085	187	0.03702	931	1
dDocent_Contig_5361	208	0.03702	904	1
dDocent_Contig_28331	290	0.03702	931	1
dDocent_Contig_6022	256	0.03704	917	1
dDocent_Contig_11621	250	0.03706	903	1
dDocent_Contig_3439	212	0.03708	916	1
dDocent_Contig_6207	22	0.03712	915	1
dDocent_Contig_10207	63	0.03714	901	1
dDocent_Contig_21983	158	0.03714	901	1
dDocent_Contig_32741	161	0.03714	901	1
dDocent_Contig_9758	52	0.03718	900	1
dDocent_Contig_13422	141	0.03722	899	1
dDocent_Contig_25597	85	0.03722	899	1
dDocent_Contig_41148	119	0.03722	899	1
dDocent_Contig_21614	58	0.03724	912	1
dDocent_Contig_48650	28	0.03728	911	1
dDocent_Contig_35628	219	0.03731	897	1
dDocent_Contig_9021	30	0.03735	896	1
dDocent_Contig_10618	26	0.03735	896	1
dDocent_Contig_38814	111	0.03739	895	1
dDocent_Contig_13279	243	0.0376	890	1
dDocent_Contig_18716	233	0.0376	890	1
dDocent_Contig_24015	53	0.03762	916	1
dDocent_Contig_4067	109	0.03765	902	1
dDocent_Contig_24606	291	0.03765	902	1
dDocent_Contig_4142	18	0.03768	888	1
dDocent_Contig_7026	248	0.03768	888	1
dDocent_Contig_26786	115	0.03769	901	1
dDocent_Contig_6877	169	0.03775	913	1
dDocent_Contig_37136	135	0.0379	883	1
dDocent_Contig_36459	83	0.03794	882	1
dDocent_Contig_26573	186	0.03802	880	1
dDocent_Contig_29980	49	0.03807	879	1
dDocent_Contig_55191	190	0.03807	892	1
dDocent_Contig_629	152	0.03811	878	1
dDocent_Contig_15085	50	0.03811	878	1
dDocent_Contig_49623	230	0.03815	877	1
dDocent_Contig_2975	236	0.0382	876	1
dDocent_Contig_2239	272	0.03825	888	1
dDocent_Contig_25397	214	0.03825	888	1
dDocent_Contig_10674	214	0.03833	873	1
dDocent_Contig_6042	205	0.03837	872	1
dDocent_Contig_638	280	0.03842	884	1
dDocent_Contig_4267	67	0.03855	881	1
dDocent_Contig_40043	173	0.03855	868	1
dDocent_Contig_21875	286	0.03859	880	1
dDocent_Contig_9837	180	0.03864	866	1
dDocent_Contig_1815	119	0.03868	865	1
dDocent_Contig_6341	109	0.03873	864	1
dDocent_Contig_16777	267	0.03873	864	1
dDocent_Contig_27459	67	0.03877	863	1
dDocent_Contig_29360	287	0.03877	876	1
dDocent_Contig_33494	82	0.03877	876	1
dDocent_Contig_23316	85	0.03881	875	1
dDocent_Contig_11957	188	0.03895	859	1
dDocent_Contig_34501	271	0.03895	872	1
dDocent_Contig_18654	112	0.03904	857	1
dDocent_Contig_34835	290	0.03909	856	1
dDocent_Contig_18894	263	0.03918	854	1
dDocent_Contig_39553	110	0.03923	853	1
dDocent_Contig_601	181	0.03926	865	1
dDocent_Contig_27518	204	0.03927	852	1
dDocent_Contig_37576	91	0.03935	863	1
dDocent_Contig_23290	56	0.03944	861	1
dDocent_Contig_270	19	0.03946	848	1
dDocent_Contig_25004	113	0.03972	855	1
dDocent_Contig_27840	28	0.03972	855	1
dDocent_Contig_1799	180	0.03974	842	1
dDocent_Contig_22403	40	0.03974	842	1
dDocent_Contig_3886	86	0.03983	840	1
dDocent_Contig_2865	91	0.03991	851	1
dDocent_Contig_3213	270	0.04	849	1
dDocent_Contig_2794	278	0.04002	836	1
dDocent_Contig_3310	73	0.04002	836	1
dDocent_Contig_53836	89	0.04014	846	1
dDocent_Contig_19135	201	0.04019	845	1
dDocent_Contig_27035	160	0.04019	845	1
dDocent_Contig_15877	79	0.04022	832	1
dDocent_Contig_23334	12	0.04022	832	1
dDocent_Contig_4797	54	0.04026	831	1
dDocent_Contig_12237	135	0.04031	830	1
dDocent_Contig_41429	287	0.04031	830	1
dDocent_Contig_9558	70	0.04036	829	1
dDocent_Contig_12163	152	0.04038	841	1
dDocent_Contig_6868	33	0.04041	828	1
dDocent_Contig_2534	125	0.04046	827	1
dDocent_Contig_7691	72	0.04046	827	1
dDocent_Contig_46117	238	0.04057	837	1
dDocent_Contig_34951	42	0.04066	823	1
dDocent_Contig_13013	119	0.0407	822	1
dDocent_Contig_22775	16	0.0407	822	1
dDocent_Contig_22775	227	0.0407	822	1
dDocent_Contig_2272	283	0.04075	821	1
dDocent_Contig_8400	97	0.04087	831	1
dDocent_Contig_33136	61	0.04091	830	1
dDocent_Contig_31401	34	0.04096	829	1
dDocent_Contig_1750	185	0.04101	828	1
dDocent_Contig_25291	48	0.0411	814	1
dDocent_Contig_9252	132	0.04111	826	1
dDocent_Contig_27648	171	0.04115	813	1
dDocent_Contig_29079	234	0.04115	813	1
dDocent_Contig_13575	234	0.04116	825	1
dDocent_Contig_35449	175	0.04126	811	1
dDocent_Contig_41935	11	0.04126	823	1
dDocent_Contig_52461	265	0.04126	823	1
dDocent_Contig_38014	238	0.04131	810	1
dDocent_Contig_2480	252	0.04136	821	1
dDocent_Contig_7678	178	0.04136	809	1
dDocent_Contig_5311	141	0.04141	808	1
dDocent_Contig_28339	21	0.04146	807	1
dDocent_Contig_28794	228	0.04146	807	1
dDocent_Contig_46290	275	0.04146	819	1
dDocent_Contig_24103	131	0.04151	818	1
dDocent_Contig_49595	208	0.04151	806	1
dDocent_Contig_4874	178	0.04156	805	1
dDocent_Contig_45824	152	0.04156	817	1
dDocent_Contig_2519	180	0.04167	803	1
dDocent_Contig_8446	129	0.04167	803	1
dDocent_Contig_9513	51	0.04167	803	1
dDocent_Contig_12353	61	0.04172	814	1
dDocent_Contig_2432	88	0.04177	801	1
dDocent_Contig_11237	262	0.04177	813	1
dDocent_Contig_44001	89	0.04177	801	1
dDocent_Contig_41716	79	0.04182	812	1
dDocent_Contig_12031	250	0.04188	799	1
dDocent_Contig_39182	130	0.04188	799	1
dDocent_Contig_4123	106	0.04198	797	1
dDocent_Contig_54701	277	0.04198	797	1
dDocent_Contig_36902	103	0.04209	795	1
dDocent_Contig_36902	257	0.04209	795	1
dDocent_Contig_31672	186	0.04213	806	1
dDocent_Contig_1851	37	0.0423	791	1
dDocent_Contig_7211	244	0.0423	791	1
dDocent_Contig_14567	196	0.04241	789	1
dDocent_Contig_602	224	0.04245	800	1
dDocent_Contig_7530	39	0.04245	800	1
dDocent_Contig_8216	291	0.04245	800	1
dDocent_Contig_14604	102	0.04246	788	1
dDocent_Contig_13631	243	0.04257	786	1
dDocent_Contig_4389	159	0.04262	785	1
dDocent_Contig_133	217	0.04268	784	1
dDocent_Contig_46304	201	0.04268	784	1
dDocent_Contig_53374	91	0.04268	784	1
dDocent_Contig_53374	205	0.04268	784	1
dDocent_Contig_19282	208	0.04278	782	1
dDocent_Contig_29561	178	0.04282	793	1
dDocent_Contig_4560	17	0.04293	791	1
dDocent_Contig_28383	164	0.04293	791	1
dDocent_Contig_31426	65	0.04293	791	1
dDocent_Contig_1395	209	0.04295	779	1
dDocent_Contig_15043	279	0.04295	779	1
dDocent_Contig_35563	13	0.04295	779	1
dDocent_Contig_57822	242	0.04298	790	1
dDocent_Contig_17887	189	0.043	778	1
dDocent_Contig_6294	226	0.04304	789	1
dDocent_Contig_37470	21	0.04304	789	1
dDocent_Contig_3155	26	0.04306	777	1
dDocent_Contig_14545	272	0.04306	777	1
dDocent_Contig_12482	115	0.04311	776	1
dDocent_Contig_43975	285	0.04326	785	1
dDocent_Contig_14942	263	0.04328	773	1
dDocent_Contig_6986	7	0.04331	784	1
dDocent_Contig_48352	166	0.04334	772	1
dDocent_Contig_22185	235	0.04339	771	1
dDocent_Contig_41948	271	0.04342	782	1
dDocent_Contig_12718	260	0.04345	770	1
dDocent_Contig_25275	57	0.04356	768	1
dDocent_Contig_5543	115	0.04359	779	1
dDocent_Contig_24287	95	0.04362	767	1
dDocent_Contig_6975	111	0.04368	766	1
dDocent_Contig_14639	16	0.04368	766	1
dDocent_Contig_24470	221	0.04368	766	1
dDocent_Contig_34154	164	0.04373	765	1
dDocent_Contig_43113	64	0.04373	765	1
dDocent_Contig_58056	228	0.04381	775	1
dDocent_Contig_8368	160	0.04385	763	1
dDocent_Contig_24832	229	0.04385	763	1
dDocent_Contig_40318	143	0.04396	761	1
dDocent_Contig_25548	181	0.04398	772	1
dDocent_Contig_2351	39	0.04402	760	1
dDocent_Contig_25570	110	0.04414	758	1
dDocent_Contig_47669	119	0.04414	758	1
dDocent_Contig_847	182	0.04425	756	1
dDocent_Contig_9168	101	0.04425	756	1
dDocent_Contig_17657	39	0.04425	756	1
dDocent_Contig_28392	61	0.04431	755	1
dDocent_Contig_11279	87	0.04433	766	1
dDocent_Contig_864	66	0.04439	765	1
dDocent_Contig_34122	202	0.04439	765	1
dDocent_Contig_3447	232	0.04444	764	1
dDocent_Contig_36203	67	0.04444	764	1
dDocent_Contig_48227	103	0.04468	760	1
dDocent_Contig_24090	24	0.04485	746	1
dDocent_Contig_2111	47	0.04491	745	1
dDocent_Contig_10903	136	0.04491	756	1
dDocent_Contig_23637	139	0.04491	756	1
dDocent_Contig_27843	67	0.04491	745	1
dDocent_Contig_18827	128	0.04497	755	1
dDocent_Contig_37633	68	0.04497	744	1
dDocent_Contig_7082	81	0.04503	743	1
dDocent_Contig_10377	49	0.04509	742	1
dDocent_Contig_11769	21	0.04509	753	1
dDocent_Contig_13313	266	0.04509	742	1
dDocent_Contig_14498	84	0.04509	742	1
dDocent_Contig_1724	286	0.04515	752	1
dDocent_Contig_8118	289	0.04527	739	1
dDocent_Contig_32431	119	0.04527	750	1
dDocent_Contig_19229	104	0.04539	748	1
dDocent_Contig_19229	186	0.04539	748	1
dDocent_Contig_6825	79	0.04545	736	1
dDocent_Contig_18458	5	0.04545	736	1
dDocent_Contig_11980	90	0.04552	735	1
dDocent_Contig_8989	25	0.04558	745	1
dDocent_Contig_36700	103	0.04558	734	1
dDocent_Contig_10212	86	0.04564	744	1
dDocent_Contig_3206	71	0.0457	743	1
dDocent_Contig_6796	222	0.0457	743	1
dDocent_Contig_12784	200	0.0457	732	1
dDocent_Contig_21755	265	0.0457	732	1
dDocent_Contig_32916	131	0.0457	732	1
dDocent_Contig_10606	184	0.04577	731	1
dDocent_Contig_19875	74	0.04577	731	1
dDocent_Contig_30967	5	0.04583	730	1
dDocent_Contig_9982	112	0.04589	729	1
dDocent_Contig_28308	193	0.04589	729	1
dDocent_Contig_23000	39	0.04595	728	1
dDocent_Contig_32438	101	0.04595	728	1
dDocent_Contig_8217	77	0.04602	727	1
dDocent_Contig_3416	26	0.04607	737	1
dDocent_Contig_50216	255	0.04608	726	1
dDocent_Contig_2519	48	0.04614	725	1
dDocent_Contig_29284	203	0.04614	725	1
dDocent_Contig_34887	82	0.0462	735	1
dDocent_Contig_1117	279	0.04621	724	1
dDocent_Contig_2967	40	0.04627	723	1
dDocent_Contig_1883	82	0.04633	722	1
dDocent_Contig_6459	170	0.04633	722	1
dDocent_Contig_9806	20	0.0464	721	1
dDocent_Contig_15854	230	0.0464	721	1
dDocent_Contig_29294	233	0.04646	720	1
dDocent_Contig_33373	229	0.04651	730	1
dDocent_Contig_179	59	0.04653	719	1
dDocent_Contig_4018	204	0.04659	718	1
dDocent_Contig_19362	56	0.04664	728	1
dDocent_Contig_9536	140	0.04666	717	1
dDocent_Contig_13460	72	0.04666	717	1
dDocent_Contig_3192	289	0.04672	716	1
dDocent_Contig_9533	125	0.04672	716	1
dDocent_Contig_7350	29	0.04677	726	1
dDocent_Contig_17034	118	0.04685	714	1
dDocent_Contig_7751	190	0.0469	724	1
dDocent_Contig_2693	55	0.04696	723	1
dDocent_Contig_14119	215	0.04698	712	1
dDocent_Contig_41128	159	0.04698	712	1
dDocent_Contig_18193	79	0.04709	721	1
dDocent_Contig_23869	40	0.04718	709	1
dDocent_Contig_36740	127	0.04722	719	1
dDocent_Contig_32292	243	0.04725	708	1
dDocent_Contig_32739	165	0.04725	708	1
dDocent_Contig_6509	252	0.04729	718	1
dDocent_Contig_29478	157	0.04738	706	1
dDocent_Contig_274	41	0.04742	716	1
dDocent_Contig_12533	75	0.04745	705	1
dDocent_Contig_5075	20	0.04749	715	1
dDocent_Contig_11387	249	0.04749	715	1
dDocent_Contig_11387	266	0.04749	715	1
dDocent_Contig_23017	141	0.04759	703	1
dDocent_Contig_10430	132	0.04765	702	1
dDocent_Contig_2693	179	0.04779	700	1
dDocent_Contig_36177	93	0.04779	700	1
dDocent_Contig_48377	197	0.04786	699	1
dDocent_Contig_21278	130	0.04789	709	1
dDocent_Contig_30487	258	0.04789	709	1
dDocent_Contig_38827	140	0.04789	709	1
dDocent_Contig_9185	227	0.04806	696	1
dDocent_Contig_12334	234	0.04806	696	1
dDocent_Contig_23982	101	0.04806	696	1
dDocent_Contig_43891	101	0.04813	695	1
dDocent_Contig_1288	33	0.0482	694	1
dDocent_Contig_34654	239	0.0482	694	1
dDocent_Contig_4058	68	0.04827	693	1
dDocent_Contig_40089	112	0.0483	703	1
dDocent_Contig_29856	173	0.04836	702	1
dDocent_Contig_4279	208	0.04843	701	1
dDocent_Contig_33617	295	0.04843	701	1
dDocent_Contig_4389	59	0.0485	700	1
dDocent_Contig_11472	15	0.0485	700	1
dDocent_Contig_27613	173	0.04855	689	1
dDocent_Contig_32334	163	0.04862	688	1
dDocent_Contig_31316	176	0.04864	698	1
dDocent_Contig_45793	285	0.04871	697	1
dDocent_Contig_40506	124	0.04876	686	1
dDocent_Contig_6269	210	0.04878	696	1
dDocent_Contig_6793	129	0.04891	684	1
dDocent_Contig_23682	100	0.04892	694	1
dDocent_Contig_24678	127	0.04892	694	1
dDocent_Contig_19182	139	0.04898	683	1
dDocent_Contig_22570	274	0.04899	693	1
dDocent_Contig_45298	28	0.04905	682	1
dDocent_Contig_20485	135	0.04912	681	1
dDocent_Contig_17847	260	0.04913	691	1
dDocent_Contig_48882	287	0.04913	691	1
dDocent_Contig_3231	165	0.04919	680	1
dDocent_Contig_9976	223	0.0492	690	1
dDocent_Contig_18904	114	0.0492	690	1
dDocent_Contig_28339	272	0.0492	690	1
dDocent_Contig_891	186	0.04928	689	1
dDocent_Contig_20912	211	0.04934	678	1
dDocent_Contig_23290	70	0.04934	678	1
dDocent_Contig_10239	27	0.04935	688	1
dDocent_Contig_1104	241	0.04948	676	1
dDocent_Contig_15279	240	0.04956	675	1
dDocent_Contig_25594	152	0.04956	675	1
dDocent_Contig_51306	182	0.04963	674	1
dDocent_Contig_22731	49	0.04993	670	1
dDocent_Contig_15055	223	0.05	669	1
dDocent_Contig_19349	174	0.05007	668	1
dDocent_Contig_6594	230	0.05015	667	1
dDocent_Contig_26870	31	0.05015	677	1
dDocent_Contig_4884	173	0.05022	676	1
dDocent_Contig_9532	267	0.05022	676	1
dDocent_Contig_3222	229	0.05037	674	1
dDocent_Contig_36757	94	0.05038	664	1
dDocent_Contig_26989	275	0.05052	672	1
dDocent_Contig_23487	13	0.05053	662	1
dDocent_Contig_43968	186	0.05053	662	1
dDocent_Contig_6594	57	0.05067	670	1
dDocent_Contig_49072	235	0.05068	660	1
dDocent_Contig_3984	131	0.05075	669	1
dDocent_Contig_7134	280	0.05075	669	1
dDocent_Contig_28961	73	0.05075	669	1
dDocent_Contig_22499	27	0.05076	659	1
dDocent_Contig_1167	251	0.05091	657	1
dDocent_Contig_11586	156	0.05097	666	1
dDocent_Contig_17097	259	0.05099	656	1
dDocent_Contig_25776	33	0.05113	664	1
dDocent_Contig_6751	190	0.05115	654	1
dDocent_Contig_24016	93	0.0513	652	1
dDocent_Contig_43989	220	0.0513	652	1
dDocent_Contig_18160	78	0.05144	660	1
dDocent_Contig_975	132	0.05162	648	1
dDocent_Contig_18669	238	0.05162	648	1
dDocent_Contig_34862	104	0.05162	648	1
dDocent_Contig_24187	212	0.05164	638	1
dDocent_Contig_33869	132	0.05164	638	1
dDocent_Contig_39260	163	0.0517	647	1
dDocent_Contig_6516	183	0.05172	637	1
dDocent_Contig_2272	234	0.05175	656	1
dDocent_Contig_11702	222	0.05178	646	1
dDocent_Contig_12868	278	0.05186	645	1
dDocent_Contig_23369	241	0.05186	645	1
dDocent_Contig_8781	40	0.05189	635	1
dDocent_Contig_24669	240	0.05189	635	1
dDocent_Contig_28461	284	0.05189	635	1
dDocent_Contig_55190	263	0.05189	635	1
dDocent_Contig_24845	36	0.05194	644	1
dDocent_Contig_8432	218	0.05197	634	1
dDocent_Contig_14578	108	0.05197	634	1
dDocent_Contig_21748	259	0.05213	632	1
dDocent_Contig_23643	171	0.05213	632	1
dDocent_Contig_31654	50	0.05213	632	1
dDocent_Contig_30717	30	0.05218	641	1
dDocent_Contig_13089	230	0.05222	631	1
dDocent_Contig_13089	235	0.05222	631	1
dDocent_Contig_13089	250	0.05222	631	1
dDocent_Contig_13089	295	0.05222	631	1
dDocent_Contig_2944	163	0.05226	640	1
dDocent_Contig_12762	214	0.05238	629	1
dDocent_Contig_36370	17	0.05239	648	1
dDocent_Contig_1566	66	0.05243	638	1
dDocent_Contig_8659	60	0.05246	628	1
dDocent_Contig_35886	84	0.05246	628	1
dDocent_Contig_28131	229	0.05255	627	1
dDocent_Contig_46502	200	0.05255	627	1
dDocent_Contig_8504	43	0.05267	635	1
dDocent_Contig_48014	26	0.05272	625	1
dDocent_Contig_13860	288	0.0528	624	1
dDocent_Contig_17994	14	0.05284	633	1
dDocent_Contig_20448	246	0.05304	640	1
dDocent_Contig_11732	71	0.05314	620	1
dDocent_Contig_32877	22	0.05314	620	1
dDocent_Contig_36374	91	0.05314	620	1
dDocent_Contig_4307	131	0.05317	629	1
dDocent_Contig_21334	27	0.05317	629	1
dDocent_Contig_27042	162	0.05317	629	1
dDocent_Contig_36587	112	0.05326	628	1
dDocent_Contig_14141	229	0.05331	618	1
dDocent_Contig_19139	119	0.05331	618	1
dDocent_Contig_23560	200	0.05331	618	1
dDocent_Contig_1061	44	0.05334	627	1
dDocent_Contig_1061	56	0.05334	627	1
dDocent_Contig_2693	287	0.0534	617	1
dDocent_Contig_53374	163	0.05348	616	1
dDocent_Contig_54878	134	0.05357	615	1
dDocent_Contig_2815	221	0.05369	623	1
dDocent_Contig_29955	94	0.05375	613	1
dDocent_Contig_20934	42	0.05383	612	1
dDocent_Contig_3888	130	0.05386	621	1
dDocent_Contig_22594	45	0.05386	621	1
dDocent_Contig_5317	113	0.05395	620	1
dDocent_Contig_19682	233	0.05395	620	1
dDocent_Contig_20418	117	0.0541	609	1
dDocent_Contig_21202	86	0.05412	618	1
dDocent_Contig_2210	178	0.05419	608	1
dDocent_Contig_2566	277	0.05419	608	1
dDocent_Contig_34862	8	0.05419	608	1
dDocent_Contig_34862	210	0.05419	608	1
dDocent_Contig_8130	222	0.05421	617	1
dDocent_Contig_39618	122	0.05428	607	1
dDocent_Contig_43053	33	0.05428	607	1
dDocent_Contig_631	107	0.05437	606	1
dDocent_Contig_19199	94	0.05437	606	1
dDocent_Contig_12762	26	0.05438	615	1
dDocent_Contig_28969	55	0.05446	605	1
dDocent_Contig_39080	59	0.05446	605	1
dDocent_Contig_25848	69	0.05456	613	1
dDocent_Contig_11387	195	0.05464	603	1
dDocent_Contig_42738	63	0.05464	603	1
dDocent_Contig_42738	195	0.05464	603	1
dDocent_Contig_33494	272	0.05473	602	1
dDocent_Contig_22540	141	0.05483	610	1
dDocent_Contig_10614	218	0.05491	600	1
dDocent_Contig_12792	93	0.05491	600	1
dDocent_Contig_22858	171	0.05491	600	1
dDocent_Contig_20835	284	0.05492	609	1
dDocent_Contig_35192	102	0.055	599	1
dDocent_Contig_4093	93	0.05501	608	1
dDocent_Contig_1998	38	0.05518	597	1
dDocent_Contig_1991	30	0.05528	596	1
dDocent_Contig_17869	272	0.05528	596	1
dDocent_Contig_12938	94	0.05537	595	1
dDocent_Contig_22397	84	0.05537	604	1
dDocent_Contig_27672	139	0.05537	595	1
dDocent_Contig_5277	269	0.05546	603	1
dDocent_Contig_5830	278	0.05546	603	1
dDocent_Contig_24206	206	0.05546	603	1
dDocent_Contig_26288	10	0.05546	594	1
dDocent_Contig_52641	236	0.05546	594	1
dDocent_Contig_56715	20	0.05546	594	1
dDocent_Contig_9990	122	0.05556	593	1
dDocent_Contig_37735	160	0.05556	593	1
dDocent_Contig_11165	256	0.05565	592	1
dDocent_Contig_24825	206	0.05565	601	1
dDocent_Contig_12222	180	0.05584	590	1
dDocent_Contig_35038	270	0.05593	598	1
dDocent_Contig_11170	277	0.05603	588	1
dDocent_Contig_42565	8	0.05603	588	1
dDocent_Contig_1671	10	0.05612	587	1
dDocent_Contig_6025	38	0.05622	586	1
dDocent_Contig_20390	186	0.0563	594	1
dDocent_Contig_20390	255	0.0563	594	1
dDocent_Contig_8244	134	0.05641	584	1
dDocent_Contig_11725	57	0.05649	592	1
dDocent_Contig_27861	174	0.05651	583	1
dDocent_Contig_40141	80	0.05659	591	1
dDocent_Contig_29190	264	0.0566	582	1
dDocent_Contig_4084	92	0.05668	590	1
dDocent_Contig_12371	161	0.0567	581	1
dDocent_Contig_18603	47	0.0567	581	1
dDocent_Contig_13499	43	0.05678	589	1
dDocent_Contig_16380	126	0.05678	589	1
dDocent_Contig_3847	220	0.0568	580	1
dDocent_Contig_12310	116	0.0568	580	1
dDocent_Contig_9	45	0.0569	579	1
dDocent_Contig_24633	218	0.0569	579	1
dDocent_Contig_33680	258	0.05699	578	1
dDocent_Contig_13740	226	0.05707	586	1
dDocent_Contig_29807	243	0.05709	577	1
dDocent_Contig_36374	256	0.05709	577	1
dDocent_Contig_42319	72	0.05717	585	1
dDocent_Contig_5448	24	0.05719	576	1
dDocent_Contig_34387	234	0.05719	576	1
dDocent_Contig_13806	31	0.05726	584	1
dDocent_Contig_18669	100	0.05729	575	1
dDocent_Contig_3942	97	0.05736	583	1
dDocent_Contig_38679	135	0.05739	574	1
dDocent_Contig_43293	18	0.05749	573	1
dDocent_Contig_6509	267	0.05759	572	1
dDocent_Contig_12946	35	0.05759	572	1
dDocent_Contig_12946	41	0.05759	572	1
dDocent_Contig_12946	114	0.05759	572	1
dDocent_Contig_23947	141	0.05759	572	1
dDocent_Contig_32318	155	0.05766	580	1
dDocent_Contig_2622	271	0.05769	571	1
dDocent_Contig_16279	202	0.05769	571	1
dDocent_Contig_27983	261	0.05769	571	1
dDocent_Contig_11337	141	0.05776	579	1
dDocent_Contig_3533	29	0.05779	570	1
dDocent_Contig_29364	248	0.05779	570	1
dDocent_Contig_37155	39	0.05779	570	1
dDocent_Contig_33788	255	0.05786	578	1
dDocent_Contig_8716	228	0.05806	576	1
dDocent_Contig_4545	98	0.0581	567	1
dDocent_Contig_6594	86	0.0582	566	1
dDocent_Contig_6594	94	0.0582	566	1
dDocent_Contig_17917	152	0.0582	566	1
dDocent_Contig_18082	133	0.0582	566	1
dDocent_Contig_19890	268	0.05826	574	1
dDocent_Contig_1040	219	0.0583	565	1
dDocent_Contig_7866	243	0.0583	565	1
dDocent_Contig_27101	15	0.05841	564	1
dDocent_Contig_35945	195	0.05841	564	1
dDocent_Contig_37674	10	0.05841	564	1
dDocent_Contig_5837	159	0.05846	572	1
dDocent_Contig_7443	257	0.05851	563	1
dDocent_Contig_42163	98	0.05851	563	1
dDocent_Contig_704	230	0.05861	562	1
dDocent_Contig_26051	14	0.05861	562	1
dDocent_Contig_4363	34	0.05877	569	1
dDocent_Contig_12494	107	0.05877	569	1
dDocent_Contig_19436	15	0.05882	560	1
dDocent_Contig_43779	174	0.05888	568	1
dDocent_Contig_41437	130	0.05893	559	1
dDocent_Contig_4127	36	0.05898	567	1
dDocent_Contig_44683	229	0.05903	558	1
dDocent_Contig_3151	31	0.05908	566	1
dDocent_Contig_14632	169	0.05914	557	1
dDocent_Contig_15033	172	0.05919	565	1
dDocent_Contig_7925	215	0.05925	556	1
dDocent_Contig_13241	218	0.05925	556	1
dDocent_Contig_10663	141	0.05929	564	1
dDocent_Contig_235	259	0.0594	563	1
dDocent_Contig_10165	107	0.05946	554	1
dDocent_Contig_16722	194	0.05946	554	1
dDocent_Contig_6947	121	0.0595	562	1
dDocent_Contig_214	170	0.05957	553	1
dDocent_Contig_3267	73	0.05957	553	1
dDocent_Contig_6043	286	0.05957	553	1
dDocent_Contig_9022	135	0.05957	553	1
dDocent_Contig_14409	262	0.05957	553	1
dDocent_Contig_18064	285	0.05957	553	1
dDocent_Contig_10711	217	0.05961	561	1
dDocent_Contig_36799	159	0.05961	561	1
dDocent_Contig_39238	225	0.05967	552	1
dDocent_Contig_36693	241	0.05982	559	1
dDocent_Contig_4884	276	0.06	549	1
dDocent_Contig_21151	59	0.06	549	1
dDocent_Contig_26802	41	0.06	549	1
dDocent_Contig_1851	57	0.06011	548	1
dDocent_Contig_7701	91	0.06025	555	1
dDocent_Contig_38725	217	0.06025	555	1
dDocent_Contig_8347	233	0.06033	546	1
dDocent_Contig_47676	193	0.06033	546	1
dDocent_Contig_152	195	0.06036	554	1
dDocent_Contig_29604	236	0.06036	554	1
dDocent_Contig_8715	70	0.06044	545	1
dDocent_Contig_26920	209	0.06044	545	1
dDocent_Contig_33629	288	0.06047	553	1
dDocent_Contig_51497	116	0.06058	552	1
dDocent_Contig_26842	222	0.06066	543	1
dDocent_Contig_36199	74	0.06069	551	1
dDocent_Contig_12084	50	0.06077	542	1
dDocent_Contig_17350	73	0.06077	542	1
dDocent_Contig_18703	44	0.06089	541	1
dDocent_Contig_45627	230	0.06091	549	1
dDocent_Contig_36890	208	0.061	540	1
dDocent_Contig_49744	176	0.061	540	1
dDocent_Contig_23839	240	0.06102	548	1
dDocent_Contig_51549	83	0.06102	548	1
dDocent_Contig_26078	193	0.06113	547	1
dDocent_Contig_36602	197	0.06113	547	1
dDocent_Contig_30960	134	0.06122	538	1
dDocent_Contig_34321	164	0.06122	538	1
dDocent_Contig_4580	218	0.06124	546	1
dDocent_Contig_28508	93	0.06124	546	1
dDocent_Contig_34834	53	0.06124	546	1
dDocent_Contig_839	69	0.06134	537	1
dDocent_Contig_4186	66	0.06134	537	1
dDocent_Contig_4646	262	0.06134	537	1
dDocent_Contig_10294	252	0.06147	544	1
dDocent_Contig_11967	46	0.06147	544	1
dDocent_Contig_53644	21	0.06147	544	1
dDocent_Contig_18366	224	0.06157	535	1
dDocent_Contig_11339	148	0.06158	543	1
dDocent_Contig_25312	155	0.06169	542	1
dDocent_Contig_21875	188	0.0618	533	1
dDocent_Contig_21875	209	0.0618	533	1
dDocent_Contig_21875	232	0.0618	533	1
dDocent_Contig_21875	248	0.0618	533	1
dDocent_Contig_21875	278	0.0618	533	1
dDocent_Contig_29234	195	0.0618	533	1
dDocent_Contig_7108	57	0.06181	541	1
dDocent_Contig_47489	210	0.06181	541	1
dDocent_Contig_14535	175	0.06191	532	1
dDocent_Contig_50738	33	0.06191	532	1
dDocent_Contig_21793	61	0.06192	540	1
dDocent_Contig_2206	121	0.06203	531	1
dDocent_Contig_2206	222	0.06203	531	1
dDocent_Contig_5277	107	0.06203	531	1
dDocent_Contig_20196	157	0.06203	531	1
dDocent_Contig_46664	194	0.06203	531	1
dDocent_Contig_50195	201	0.06203	531	1
dDocent_Contig_10235	226	0.06215	538	1
dDocent_Contig_3084	90	0.06227	537	1
dDocent_Contig_33768	102	0.06227	537	1
dDocent_Contig_195	194	0.06238	536	1
dDocent_Contig_34355	72	0.06238	528	1
dDocent_Contig_52575	15	0.06238	536	1
dDocent_Contig_4228	91	0.0625	535	1
dDocent_Contig_4228	121	0.0625	535	1
dDocent_Contig_4228	241	0.0625	535	1
dDocent_Contig_9663	180	0.0625	527	1
dDocent_Contig_25362	212	0.0625	527	1
dDocent_Contig_29287	176	0.0625	527	1
dDocent_Contig_31463	173	0.0625	527	1
dDocent_Contig_40013	260	0.0625	527	1
dDocent_Contig_29442	162	0.06262	526	1
dDocent_Contig_19509	227	0.06274	525	1
dDocent_Contig_11179	287	0.06285	532	1
dDocent_Contig_13641	178	0.06285	532	1
dDocent_Contig_33345	64	0.06286	524	1
dDocent_Contig_9404	97	0.06297	531	1
dDocent_Contig_17341	148	0.06297	531	1
dDocent_Contig_45082	71	0.06298	523	1
dDocent_Contig_14706	166	0.06309	530	1
dDocent_Contig_25353	176	0.0631	522	1
dDocent_Contig_11535	183	0.06322	521	1
dDocent_Contig_41521	173	0.06322	521	1
dDocent_Contig_5382	179	0.06333	528	1
dDocent_Contig_17011	245	0.06333	528	1
dDocent_Contig_3124	245	0.06334	520	1
dDocent_Contig_26371	215	0.06334	520	1
dDocent_Contig_57962	29	0.06334	520	1
dDocent_Contig_11282	262	0.06358	518	1
dDocent_Contig_50797	88	0.06358	518	1
dDocent_Contig_13073	200	0.06371	517	1
dDocent_Contig_36199	68	0.06371	517	1
dDocent_Contig_719	95	0.06383	516	1
dDocent_Contig_8716	173	0.06383	516	1
dDocent_Contig_10268	110	0.06393	523	1
dDocent_Contig_4489	250	0.06395	515	1
dDocent_Contig_15917	259	0.06395	515	1
dDocent_Contig_18127	273	0.06395	515	1
dDocent_Contig_44001	18	0.06395	515	1
dDocent_Contig_2072	189	0.06408	514	1
dDocent_Contig_23556	135	0.06408	514	1
dDocent_Contig_35948	66	0.06408	514	1
dDocent_Contig_18471	69	0.06418	521	1
dDocent_Contig_7414	267	0.0642	513	1
dDocent_Contig_21624	69	0.0642	513	1
dDocent_Contig_25491	212	0.0642	513	1
dDocent_Contig_39806	123	0.0642	513	1
dDocent_Contig_1959	65	0.06442	519	1
dDocent_Contig_31951	76	0.06442	519	1
dDocent_Contig_3267	113	0.06455	518	1
dDocent_Contig_14547	272	0.06458	510	1
dDocent_Contig_24352	210	0.06458	510	1
dDocent_Contig_30713	82	0.06467	517	1
dDocent_Contig_30713	94	0.06467	517	1
dDocent_Contig_208	175	0.06471	509	1
dDocent_Contig_23476	278	0.06471	509	1
dDocent_Contig_40732	8	0.06471	509	1
dDocent_Contig_28975	73	0.0648	516	1
dDocent_Contig_53593	255	0.0648	516	1
dDocent_Contig_1509	273	0.06483	508	1
dDocent_Contig_8690	56	0.06483	508	1
dDocent_Contig_29805	44	0.06483	508	1
dDocent_Contig_29805	121	0.06483	508	1
dDocent_Contig_8175	199	0.06492	515	1
dDocent_Contig_36028	33	0.06496	507	1
dDocent_Contig_4417	77	0.06509	506	1
dDocent_Contig_6105	250	0.06509	506	1
dDocent_Contig_8732	43	0.06509	506	1
dDocent_Contig_18716	204	0.06509	506	1
dDocent_Contig_2698	45	0.06518	513	1
dDocent_Contig_32325	216	0.06518	513	1
dDocent_Contig_27222	19	0.06522	505	1
dDocent_Contig_48349	52	0.06522	505	1
dDocent_Contig_48349	57	0.06522	505	1
dDocent_Contig_21859	167	0.06535	504	1
dDocent_Contig_23010	277	0.06535	504	1
dDocent_Contig_23760	83	0.06535	504	1
dDocent_Contig_33300	267	0.06535	504	1
dDocent_Contig_43053	190	0.06535	504	1
dDocent_Contig_11035	111	0.06548	503	1
dDocent_Contig_14335	38	0.06548	503	1
dDocent_Contig_36116	251	0.06569	509	1
dDocent_Contig_3889	264	0.06574	501	1
dDocent_Contig_38646	236	0.06607	506	1
dDocent_Contig_11169	31	0.06613	498	1
dDocent_Contig_20837	227	0.06613	498	1
dDocent_Contig_35768	10	0.06613	498	1
dDocent_Contig_38135	242	0.06613	498	1
dDocent_Contig_54029	199	0.06613	498	1
dDocent_Contig_6758	200	0.06621	505	1
dDocent_Contig_6758	266	0.06621	505	1
dDocent_Contig_24075	56	0.06621	505	1
dDocent_Contig_32971	46	0.06621	505	1
dDocent_Contig_15193	25	0.06634	504	1
dDocent_Contig_41352	265	0.06634	504	1
dDocent_Contig_13481	104	0.0664	496	1
dDocent_Contig_13590	274	0.06646	488	1
dDocent_Contig_30276	83	0.06646	488	1
dDocent_Contig_41945	222	0.0666	502	1
dDocent_Contig_17209	272	0.06667	494	1
dDocent_Contig_1799	190	0.06673	501	1
dDocent_Contig_1799	202	0.06673	501	1
dDocent_Contig_1799	223	0.06673	501	1
dDocent_Contig_1799	251	0.06673	501	1
dDocent_Contig_1799	273	0.06673	501	1
dDocent_Contig_7804	141	0.06673	501	1
dDocent_Contig_955	45	0.06674	486	1
dDocent_Contig_8443	109	0.06674	486	1
dDocent_Contig_9311	186	0.06674	486	1
dDocent_Contig_10622	244	0.06674	486	1
dDocent_Contig_28605	10	0.06674	486	1
dDocent_Contig_39799	89	0.06674	486	1
dDocent_Contig_4287	31	0.0668	493	1
dDocent_Contig_14242	247	0.0668	493	1
dDocent_Contig_31511	286	0.0668	493	1
dDocent_Contig_1220	16	0.06687	485	1
dDocent_Contig_51106	104	0.06687	485	1
dDocent_Contig_16499	25	0.06694	492	1
dDocent_Contig_16554	155	0.06694	492	1
dDocent_Contig_20096	264	0.06694	492	1
dDocent_Contig_27639	280	0.067	499	1
dDocent_Contig_8168	247	0.06701	484	1
dDocent_Contig_12783	53	0.06701	484	1
dDocent_Contig_28186	29	0.06715	483	1
dDocent_Contig_10033	263	0.06729	482	1
dDocent_Contig_25033	197	0.0674	496	1
dDocent_Contig_34862	93	0.06743	481	1
dDocent_Contig_36810	183	0.06743	481	1
dDocent_Contig_31933	179	0.06748	488	1
dDocent_Contig_12720	84	0.06754	495	1
dDocent_Contig_7115	15	0.06757	480	1
dDocent_Contig_26114	273	0.06757	480	1
dDocent_Contig_39457	109	0.06757	480	1
dDocent_Contig_52469	70	0.06757	480	1
dDocent_Contig_37623	275	0.06768	494	1
dDocent_Contig_2861	35	0.06776	486	1
dDocent_Contig_15712	89	0.06781	493	1
dDocent_Contig_6679	58	0.06785	478	1
dDocent_Contig_27421	29	0.06785	478	1
dDocent_Contig_2913	189	0.0679	485	1
dDocent_Contig_41676	62	0.0679	485	1
dDocent_Contig_34106	257	0.06799	477	1
dDocent_Contig_36168	194	0.06799	477	1
dDocent_Contig_37675	206	0.06799	477	1
dDocent_Contig_16684	15	0.06828	475	1
dDocent_Contig_6026	63	0.06832	482	1
dDocent_Contig_39503	47	0.06832	482	1
dDocent_Contig_21746	197	0.06842	474	1
dDocent_Contig_22001	60	0.06842	474	1
dDocent_Contig_54307	178	0.06842	474	1
dDocent_Contig_54218	36	0.06846	481	1
dDocent_Contig_847	134	0.06857	473	1
dDocent_Contig_15563	189	0.06857	473	1
dDocent_Contig_31161	40	0.06857	473	1
dDocent_Contig_31430	267	0.06857	473	1
dDocent_Contig_17589	264	0.06861	480	1
dDocent_Contig_4884	205	0.06871	472	1
dDocent_Contig_15317	96	0.06875	479	1
dDocent_Contig_16088	124	0.06875	479	1
dDocent_Contig_39853	133	0.06875	479	1
dDocent_Contig_50993	165	0.06875	479	1
dDocent_Contig_13894	286	0.06886	471	1
dDocent_Contig_12915	266	0.069	470	1
dDocent_Contig_13121	255	0.069	470	1
dDocent_Contig_42359	219	0.069	470	1
dDocent_Contig_45802	163	0.06904	477	1
dDocent_Contig_8624	39	0.06915	469	1
dDocent_Contig_15864	33	0.06915	469	1
dDocent_Contig_37959	120	0.06915	469	1
dDocent_Contig_8030	38	0.06918	476	1
dDocent_Contig_22068	170	0.0693	468	1
dDocent_Contig_31967	63	0.0693	468	1
dDocent_Contig_662	126	0.06944	467	1
dDocent_Contig_2441	242	0.06944	467	1
dDocent_Contig_2855	188	0.06944	467	1
dDocent_Contig_6868	188	0.06947	474	1
dDocent_Contig_18096	97	0.06947	474	1
dDocent_Contig_30001	241	0.06947	474	1
dDocent_Contig_7531	220	0.06959	466	1
dDocent_Contig_26143	62	0.06959	466	1
dDocent_Contig_24633	205	0.06962	473	1
dDocent_Contig_1151	156	0.06974	465	1
dDocent_Contig_4442	185	0.06977	472	1
dDocent_Contig_28339	103	0.06992	471	1
dDocent_Contig_4359	34	0.07004	463	1
dDocent_Contig_55737	111	0.07004	463	1
dDocent_Contig_1081	242	0.07006	470	1
dDocent_Contig_44001	78	0.07006	470	1
dDocent_Contig_51192	75	0.07006	470	1
dDocent_Contig_212	93	0.07021	469	1
dDocent_Contig_7407	55	0.07036	468	1
dDocent_Contig_18963	218	0.07036	468	1
dDocent_Contig_36459	69	0.07036	468	1
dDocent_Contig_49693	117	0.07036	468	1
dDocent_Contig_2129	219	0.0705	460	1
dDocent_Contig_7703	296	0.0705	460	1
dDocent_Contig_14333	79	0.0705	460	1
dDocent_Contig_42788	278	0.0705	460	1
dDocent_Contig_9168	240	0.07051	467	1
dDocent_Contig_58103	75	0.07051	467	1
dDocent_Contig_13776	285	0.07065	459	1
dDocent_Contig_19696	37	0.07065	459	1
dDocent_Contig_23588	192	0.07065	459	1
dDocent_Contig_38584	204	0.07065	459	1
dDocent_Contig_10315	71	0.07066	466	1
dDocent_Contig_18125	209	0.07066	466	1
dDocent_Contig_31324	74	0.07066	466	1
dDocent_Contig_39472	264	0.07081	458	1
dDocent_Contig_12011	108	0.07082	465	1
dDocent_Contig_17638	116	0.07097	464	1
dDocent_Contig_28015	10	0.07112	463	1
dDocent_Contig_39388	187	0.07112	456	1
dDocent_Contig_16206	58	0.07127	455	1
dDocent_Contig_16849	103	0.07127	462	1
dDocent_Contig_18856	51	0.07127	462	1
dDocent_Contig_21563	22	0.07127	462	1
dDocent_Contig_23943	18	0.07143	461	1
dDocent_Contig_37623	171	0.07143	461	1
dDocent_Contig_13912	290	0.07174	459	1
dDocent_Contig_23000	263	0.07174	452	1
dDocent_Contig_11886	225	0.0719	451	1
dDocent_Contig_20209	242	0.0719	458	1
dDocent_Contig_39904	268	0.0719	458	1
dDocent_Contig_15584	252	0.07205	457	1
dDocent_Contig_16446	216	0.07205	457	1
dDocent_Contig_17553	165	0.07205	457	1
dDocent_Contig_689	221	0.07206	450	1
dDocent_Contig_12504	15	0.07206	450	1
dDocent_Contig_28926	215	0.07206	450	1
dDocent_Contig_35105	209	0.07222	449	1
dDocent_Contig_6594	175	0.07237	455	1
dDocent_Contig_25302	42	0.07237	455	1
dDocent_Contig_2402	267	0.07238	448	1
dDocent_Contig_15717	10	0.07238	448	1
dDocent_Contig_49028	161	0.07238	448	1
dDocent_Contig_7615	268	0.07253	454	1
dDocent_Contig_13721	48	0.07253	454	1
dDocent_Contig_914	274	0.07254	447	1
dDocent_Contig_27697	59	0.07254	447	1
dDocent_Contig_27697	248	0.07254	447	1
dDocent_Contig_29561	93	0.07254	447	1
dDocent_Contig_21455	261	0.07269	453	1
dDocent_Contig_18787	49	0.07271	446	1
dDocent_Contig_23110	111	0.07271	446	1
dDocent_Contig_6454	165	0.07301	451	1
dDocent_Contig_28196	17	0.07301	451	1
dDocent_Contig_10174	157	0.07303	444	1
dDocent_Contig_15023	209	0.07303	444	1
dDocent_Contig_22700	158	0.07303	444	1
dDocent_Contig_46691	85	0.07303	444	1
dDocent_Contig_13860	97	0.0732	443	1
dDocent_Contig_24775	172	0.0732	443	1
dDocent_Contig_1789	104	0.07336	442	1
dDocent_Contig_4843	152	0.07336	442	1
dDocent_Contig_13851	276	0.07336	442	1
dDocent_Contig_23357	47	0.07336	442	1
dDocent_Contig_24650	187	0.07336	442	1
dDocent_Contig_21039	55	0.07353	441	1
dDocent_Contig_632	44	0.07366	447	1
dDocent_Contig_1402	112	0.07366	447	1
dDocent_Contig_19007	126	0.07366	447	1
dDocent_Contig_9607	17	0.0737	440	1
dDocent_Contig_19135	164	0.0737	440	1
dDocent_Contig_43162	258	0.0737	440	1
dDocent_Contig_10964	179	0.07383	446	1
dDocent_Contig_20981	120	0.07383	446	1
dDocent_Contig_24090	129	0.07383	446	1
dDocent_Contig_8252	221	0.07386	439	1
dDocent_Contig_13089	175	0.07386	439	1
dDocent_Contig_2351	103	0.07399	445	1
dDocent_Contig_11107	48	0.07403	438	1
dDocent_Contig_21403	163	0.07403	438	1
dDocent_Contig_3044	17	0.07416	444	1
dDocent_Contig_21497	76	0.07416	444	1
dDocent_Contig_15126	63	0.0742	437	1
dDocent_Contig_11845	69	0.07437	436	1
dDocent_Contig_12252	242	0.07437	436	1
dDocent_Contig_41305	126	0.07437	436	1
dDocent_Contig_8168	241	0.07449	442	1
dDocent_Contig_10800	203	0.07449	442	1
dDocent_Contig_15636	122	0.07454	435	1
dDocent_Contig_43727	226	0.07454	435	1
dDocent_Contig_58854	233	0.07454	435	1
dDocent_Contig_10335	243	0.07471	434	1
dDocent_Contig_12667	76	0.07471	434	1
dDocent_Contig_11049	208	0.07483	440	1
dDocent_Contig_19266	106	0.07483	440	1
dDocent_Contig_17518	206	0.07488	433	1
dDocent_Contig_53315	50	0.07488	433	1
dDocent_Contig_12550	286	0.075	439	1
dDocent_Contig_7585	179	0.07506	432	1
dDocent_Contig_1674	183	0.07523	431	1
dDocent_Contig_10412	168	0.07523	431	1
dDocent_Contig_10583	283	0.07523	431	1
dDocent_Contig_23179	11	0.07523	431	1
dDocent_Contig_1872	156	0.07534	437	1
dDocent_Contig_11490	290	0.07534	437	1
dDocent_Contig_10168	11	0.07541	430	1
dDocent_Contig_19558	138	0.07541	430	1
dDocent_Contig_1283	10	0.07551	436	1
dDocent_Contig_7961	130	0.07551	436	1
dDocent_Contig_1196	121	0.07558	429	1
dDocent_Contig_981	221	0.07569	435	1
dDocent_Contig_9757	166	0.07576	428	1
dDocent_Contig_15659	282	0.07576	428	1
dDocent_Contig_21585	191	0.07576	428	1
dDocent_Contig_26837	34	0.07586	434	1
dDocent_Contig_13630	123	0.07593	427	1
dDocent_Contig_6509	286	0.07604	433	1
dDocent_Contig_17518	169	0.07604	433	1
dDocent_Contig_20403	250	0.07604	433	1
dDocent_Contig_4081	17	0.07621	432	1
dDocent_Contig_11288	67	0.07629	425	1
dDocent_Contig_11288	275	0.07629	425	1
dDocent_Contig_11468	81	0.07629	425	1
dDocent_Contig_22256	99	0.07629	425	1
dDocent_Contig_34785	31	0.07629	425	1
dDocent_Contig_43240	211	0.07639	431	1
dDocent_Contig_15164	178	0.07647	424	1
dDocent_Contig_31571	135	0.07647	424	1
dDocent_Contig_26236	59	0.07657	430	1
dDocent_Contig_22693	239	0.07674	429	1
dDocent_Contig_16735	253	0.07683	422	1
dDocent_Contig_27375	53	0.07683	422	1
dDocent_Contig_43779	186	0.07683	422	1
dDocent_Contig_50465	211	0.07683	422	1
dDocent_Contig_1193	82	0.07701	421	1
dDocent_Contig_4417	39	0.07701	421	1
dDocent_Contig_14098	46	0.07701	421	1
dDocent_Contig_26794	168	0.0772	420	1
dDocent_Contig_28701	283	0.0772	420	1
dDocent_Contig_30628	121	0.0772	420	1
dDocent_Contig_2887	235	0.07738	419	1
dDocent_Contig_6704	42	0.07738	419	1
dDocent_Contig_8982	214	0.07738	419	1
dDocent_Contig_25572	124	0.07738	419	1
dDocent_Contig_8468	273	0.07746	425	1
dDocent_Contig_4885	90	0.07757	418	1
dDocent_Contig_10684	20	0.07757	418	1
dDocent_Contig_13913	285	0.07775	417	1
dDocent_Contig_21539	163	0.07775	417	1
dDocent_Contig_47367	72	0.07775	417	1
dDocent_Contig_45993	257	0.07783	423	1
dDocent_Contig_21980	129	0.07794	416	1
dDocent_Contig_46362	80	0.07794	416	1
dDocent_Contig_46362	184	0.07794	416	1
dDocent_Contig_46362	229	0.07794	416	1
dDocent_Contig_46362	273	0.07794	416	1
dDocent_Contig_49125	39	0.07794	416	1
dDocent_Contig_49125	160	0.07794	416	1
dDocent_Contig_53699	152	0.07794	416	1
dDocent_Contig_9777	108	0.07801	422	1
dDocent_Contig_37074	44	0.07801	422	1
dDocent_Contig_37074	66	0.07801	422	1
dDocent_Contig_37074	155	0.07801	422	1
dDocent_Contig_5580	209	0.0782	421	1
dDocent_Contig_32897	55	0.0782	421	1
dDocent_Contig_32897	197	0.0782	421	1
dDocent_Contig_33869	285	0.0782	421	1
dDocent_Contig_1065	243	0.07831	414	1
dDocent_Contig_33938	213	0.07831	414	1
dDocent_Contig_21668	64	0.07838	420	1
dDocent_Contig_43562	265	0.07838	420	1
dDocent_Contig_257	52	0.0785	413	1
dDocent_Contig_493	175	0.0785	413	1
dDocent_Contig_2803	108	0.0785	413	1
dDocent_Contig_6341	204	0.0785	413	1
dDocent_Contig_10245	162	0.0785	413	1
dDocent_Contig_19027	205	0.0785	413	1
dDocent_Contig_20964	41	0.0785	413	1
dDocent_Contig_38699	51	0.0785	413	1
dDocent_Contig_2191	192	0.07857	419	1
dDocent_Contig_5530	207	0.07857	419	1
dDocent_Contig_33678	27	0.07857	419	1
dDocent_Contig_3576	51	0.07869	412	1
dDocent_Contig_17509	248	0.07869	412	1
dDocent_Contig_17793	205	0.07869	412	1
dDocent_Contig_1206	58	0.07876	418	1
dDocent_Contig_7797	252	0.07876	418	1
dDocent_Contig_21797	38	0.07876	418	1
dDocent_Contig_15146	181	0.07888	411	1
dDocent_Contig_4852	14	0.07895	417	1
dDocent_Contig_11696	36	0.07895	417	1
dDocent_Contig_1655	211	0.07908	410	1
dDocent_Contig_7622	128	0.07908	410	1
dDocent_Contig_11413	234	0.07908	410	1
dDocent_Contig_40816	92	0.07908	410	1
dDocent_Contig_53389	225	0.07908	410	1
dDocent_Contig_9383	8	0.07914	416	1
dDocent_Contig_26051	138	0.07914	416	1
dDocent_Contig_51204	183	0.07914	416	1
dDocent_Contig_51701	187	0.07914	416	1
dDocent_Contig_3247	57	0.07927	409	1
dDocent_Contig_10146	72	0.07927	409	1
dDocent_Contig_34747	41	0.07927	409	1
dDocent_Contig_33910	29	0.07933	415	1
dDocent_Contig_31507	12	0.07952	414	1
dDocent_Contig_26247	226	0.07971	413	1
dDocent_Contig_2206	251	0.07985	406	1
dDocent_Contig_5445	34	0.07985	406	1
dDocent_Contig_25619	210	0.07985	406	1
dDocent_Contig_15107	164	0.08005	405	1
dDocent_Contig_5132	201	0.0801	411	1
dDocent_Contig_20093	156	0.08025	404	1
dDocent_Contig_35952	51	0.08025	404	1
dDocent_Contig_30628	35	0.08029	410	1
dDocent_Contig_1317	235	0.08045	403	1
dDocent_Contig_22490	157	0.08045	403	1
dDocent_Contig_29284	215	0.08045	403	1
dDocent_Contig_25009	34	0.08049	409	1
dDocent_Contig_25009	53	0.08049	409	1
dDocent_Contig_25009	115	0.08049	409	1
dDocent_Contig_329	164	0.08065	402	1
dDocent_Contig_1104	234	0.08065	402	1
dDocent_Contig_36620	105	0.08065	402	1
dDocent_Contig_20479	20	0.08068	408	1
dDocent_Contig_6433	218	0.08085	401	1
dDocent_Contig_25468	199	0.08085	401	1
dDocent_Contig_32821	81	0.08085	401	1
dDocent_Contig_22992	37	0.08088	407	1
dDocent_Contig_8571	108	0.08105	400	1
dDocent_Contig_1010	126	0.08125	399	1
dDocent_Contig_10491	179	0.08128	405	1
dDocent_Contig_503	264	0.08142	392	1
dDocent_Contig_8254	200	0.08142	392	1
dDocent_Contig_18669	187	0.08142	392	1
dDocent_Contig_32271	74	0.08142	392	1
dDocent_Contig_22011	26	0.08145	398	1
dDocent_Contig_35704	130	0.08145	398	1
dDocent_Contig_550	220	0.08163	391	1
dDocent_Contig_1445	277	0.08163	391	1
dDocent_Contig_4812	221	0.08163	391	1
dDocent_Contig_14229	283	0.08163	391	1
dDocent_Contig_19956	114	0.08163	391	1
dDocent_Contig_39855	203	0.08166	397	1
dDocent_Contig_16430	93	0.08184	390	1
dDocent_Contig_32242	202	0.08184	390	1
dDocent_Contig_2626	128	0.08186	396	1
dDocent_Contig_30723	238	0.08186	396	1
dDocent_Contig_35481	159	0.08186	396	1
dDocent_Contig_38549	269	0.08186	396	1
dDocent_Contig_1948	27	0.08189	402	1
dDocent_Contig_3130	2	0.08189	402	1
dDocent_Contig_19696	121	0.08189	402	1
dDocent_Contig_20942	91	0.08189	402	1
dDocent_Contig_41256	179	0.08189	402	1
dDocent_Contig_3664	170	0.08205	389	1
dDocent_Contig_6018	197	0.08205	389	1
dDocent_Contig_15648	81	0.08205	389	1
dDocent_Contig_16482	194	0.08205	389	1
dDocent_Contig_24478	197	0.08205	389	1
dDocent_Contig_6882	12	0.08207	395	1
dDocent_Contig_16668	63	0.08207	395	1
dDocent_Contig_17888	193	0.08207	395	1
dDocent_Contig_20776	261	0.08207	395	1
dDocent_Contig_21379	222	0.08207	395	1
dDocent_Contig_39887	15	0.08207	395	1
dDocent_Contig_5100	203	0.08226	388	1
dDocent_Contig_8707	91	0.08226	388	1
dDocent_Contig_26843	17	0.08226	388	1
dDocent_Contig_29292	61	0.08226	388	1
dDocent_Contig_32786	117	0.08226	388	1
dDocent_Contig_39949	158	0.08229	400	1
dDocent_Contig_39949	166	0.08229	400	1
dDocent_Contig_4626	153	0.08247	387	1
dDocent_Contig_21456	236	0.08247	387	1
dDocent_Contig_27877	153	0.08247	387	1
dDocent_Contig_48399	207	0.08247	387	1
dDocent_Contig_51926	63	0.08247	387	1
dDocent_Contig_18591	273	0.08249	393	1
dDocent_Contig_20117	61	0.08249	393	1
dDocent_Contig_21746	178	0.08249	393	1
dDocent_Contig_35276	120	0.08249	393	1
dDocent_Contig_36040	219	0.08249	393	1
dDocent_Contig_5445	11	0.08269	386	1
dDocent_Contig_1286	188	0.0827	392	1
dDocent_Contig_13595	116	0.0827	392	1
dDocent_Contig_16477	24	0.0827	392	1
dDocent_Contig_30040	137	0.0827	392	1
dDocent_Contig_42092	283	0.08271	398	1
dDocent_Contig_7754	13	0.0829	385	1
dDocent_Contig_17978	69	0.0829	385	1
dDocent_Contig_25445	159	0.0829	385	1
dDocent_Contig_43701	165	0.0829	385	1
dDocent_Contig_3337	103	0.08312	384	1
dDocent_Contig_6968	255	0.08312	390	1
dDocent_Contig_13575	44	0.08312	384	1
dDocent_Contig_13714	196	0.08312	390	1
dDocent_Contig_14425	51	0.08312	384	1
dDocent_Contig_24579	59	0.08312	384	1
dDocent_Contig_715	5	0.08333	383	1
dDocent_Contig_9854	9	0.08333	389	1
dDocent_Contig_21257	52	0.08333	383	1
dDocent_Contig_31227	73	0.08333	389	1
dDocent_Contig_40506	201	0.08333	383	1
dDocent_Contig_42788	172	0.08333	383	1
dDocent_Contig_2435	97	0.08355	388	1
dDocent_Contig_10491	116	0.08355	388	1
dDocent_Contig_20776	195	0.08355	382	1
dDocent_Contig_21617	135	0.08355	388	1
dDocent_Contig_24418	224	0.08355	382	1
dDocent_Contig_39578	61	0.08355	382	1
dDocent_Contig_48079	160	0.08355	382	1
dDocent_Contig_27131	64	0.08376	387	1
dDocent_Contig_24151	219	0.08377	381	1
dDocent_Contig_28996	216	0.08377	381	1
dDocent_Contig_33210	233	0.08377	381	1
dDocent_Contig_2975	164	0.08399	380	1
dDocent_Contig_5576	11	0.08399	380	1
dDocent_Contig_212	132	0.0842	385	1
dDocent_Contig_19976	24	0.0842	385	1
dDocent_Contig_26873	50	0.0842	385	1
dDocent_Contig_37644	247	0.0842	385	1
dDocent_Contig_12526	159	0.08421	379	1
dDocent_Contig_14093	195	0.08421	379	1
dDocent_Contig_36090	232	0.08421	379	1
dDocent_Contig_2685	79	0.08442	384	1
dDocent_Contig_6313	193	0.08443	378	1
dDocent_Contig_24942	158	0.08443	378	1
dDocent_Contig_25659	33	0.08443	378	1
dDocent_Contig_3949	157	0.08464	383	1
dDocent_Contig_8254	261	0.08464	383	1
dDocent_Contig_8432	75	0.08466	377	1
dDocent_Contig_15201	11	0.08466	377	1
dDocent_Contig_32432	73	0.08466	377	1
dDocent_Contig_45076	170	0.08466	377	1
dDocent_Contig_14893	68	0.08486	382	1
dDocent_Contig_15950	63	0.08486	382	1
dDocent_Contig_6877	43	0.08488	376	1
dDocent_Contig_10583	232	0.08488	376	1
dDocent_Contig_49821	209	0.08488	376	1
dDocent_Contig_7355	251	0.08508	381	1
dDocent_Contig_629	265	0.08511	375	1
dDocent_Contig_1377	260	0.08511	375	1
dDocent_Contig_7440	172	0.08511	375	1
dDocent_Contig_24341	261	0.08511	375	1
dDocent_Contig_37442	47	0.08511	375	1
dDocent_Contig_56061	106	0.08511	375	1
dDocent_Contig_2049	189	0.0853	380	1
dDocent_Contig_3175	159	0.0853	380	1
dDocent_Contig_47677	84	0.0853	380	1
dDocent_Contig_5360	168	0.08533	374	1
dDocent_Contig_10116	227	0.08533	374	1
dDocent_Contig_11039	120	0.08533	374	1
dDocent_Contig_32357	255	0.08533	374	1
dDocent_Contig_865	120	0.08553	379	1
dDocent_Contig_4875	232	0.08553	379	1
dDocent_Contig_6900	230	0.08553	379	1
dDocent_Contig_11190	239	0.08553	379	1
dDocent_Contig_44887	90	0.08553	379	1
dDocent_Contig_6748	64	0.08556	373	1
dDocent_Contig_31789	163	0.08556	373	1
dDocent_Contig_37638	131	0.08556	373	1
dDocent_Contig_432	166	0.08575	378	1
dDocent_Contig_6919	87	0.08598	377	1
dDocent_Contig_27274	195	0.08598	377	1
dDocent_Contig_32932	245	0.08598	377	1
dDocent_Contig_38679	69	0.08598	377	1
dDocent_Contig_38679	79	0.08598	377	1
dDocent_Contig_15085	269	0.08602	371	1
dDocent_Contig_16554	38	0.08602	371	1
dDocent_Contig_28156	286	0.08602	371	1
dDocent_Contig_39698	251	0.08602	371	1
dDocent_Contig_52765	252	0.08602	371	1
dDocent_Contig_18896	268	0.08621	376	1
dDocent_Contig_8870	230	0.08644	375	1
dDocent_Contig_5347	244	0.08672	368	1
dDocent_Contig_22050	133	0.08672	368	1
dDocent_Contig_22951	96	0.08672	368	1
dDocent_Contig_35952	276	0.08672	368	1
dDocent_Contig_48018	274	0.08672	368	1
[truncated: 24,576 more rows]

## Sheet: TableS2d A.dowei males RADtags
#Supplementary Table S2d. RADtags in males of Anableps dowei and their association with the direction of genital asymmetry based on PLINK.
#Columns A-E: output of the association mapping conducted in PLINK.
# CHR: RADtag name. RADtags were named by using the dDocent generated ID.
# SNP: The SNP ID referst to the physical position of the allelic variation in the specific RADtag
# perm.adj.P-value: Empirical p-value obtained from an adaptive permutation test based on the most significant result of ALLELIC, DOM and REC models
# NP: number of permutation replicas conducteed to determine EMP1
#p.BH.adj: P-value corrected for family-wise error for multiple testing using Benjamini-Hochberg false discovery rate
CHR	SNP	perm.adj.P-value	NP	p.BH.adj
dDocent_Contig_53954	215	5.344e-05	654948	0.9821
dDocent_Contig_35094	36	0.0001011	346263	0.9821
dDocent_Contig_1724	203	0.0001725	202843	0.9821
dDocent_Contig_22408	158	0.0001769	197823	0.9821
dDocent_Contig_12136	48	0.0002028	172616	0.9821
dDocent_Contig_21202	86	0.00032	109358	0.9821
dDocent_Contig_17543	55	0.0004587	76309	0.9821
dDocent_Contig_34745	188	0.0005103	69561	0.9821
dDocent_Contig_7654	213	0.000561	63277	0.9821
dDocent_Contig_1142	153	0.0007088	49375	0.9821
dDocent_Contig_50452	250	0.0007771	45037	0.9821
dDocent_Contig_4117	177	0.000801	43694	0.9821
dDocent_Contig_1010	126	0.0008051	43474	0.9821
dDocent_Contig_31860	224	0.0009017	38816	0.9821
dDocent_Contig_22408	22	0.00111	31533	0.9821
dDocent_Contig_14333	216	0.001164	30494	0.9821
dDocent_Contig_16814	81	0.001341	26097	0.9821
dDocent_Contig_11713	125	0.001388	25210	0.9821
dDocent_Contig_4271	163	0.001407	24877	0.9821
dDocent_Contig_37235	110	0.001408	24852	0.9821
dDocent_Contig_13394	131	0.001537	22765	0.9821
dDocent_Contig_22700	158	0.001555	22512	0.9821
dDocent_Contig_52461	157	0.001561	22420	0.9821
dDocent_Contig_54873	196	0.001566	22351	0.9821
dDocent_Contig_1104	234	0.001574	22558	0.9821
dDocent_Contig_23476	278	0.001605	21808	0.9821
dDocent_Contig_1288	33	0.001651	21192	0.9821
dDocent_Contig_19360	278	0.001864	18780	0.9821
dDocent_Contig_32389	99	0.0019	18685	0.9821
dDocent_Contig_55191	258	0.002091	16977	0.9821
dDocent_Contig_21095	186	0.002123	16484	0.9821
dDocent_Contig_24245	259	0.002233	15896	0.9821
dDocent_Contig_30371	15	0.002245	15592	0.9821
dDocent_Contig_39735	87	0.002263	15464	0.9821
dDocent_Contig_8468	200	0.002294	15256	0.9821
dDocent_Contig_25621	244	0.002328	15032	0.9821
dDocent_Contig_2206	138	0.002495	14025	0.9821
dDocent_Contig_3942	207	0.002635	13282	0.9821
dDocent_Contig_25621	89	0.002695	13170	0.9821
dDocent_Contig_15584	252	0.002735	12794	0.9821
dDocent_Contig_13366	72	0.002848	12287	0.9821
dDocent_Contig_24352	210	0.002857	12248	0.9821
dDocent_Contig_24352	249	0.002857	12248	0.9821
dDocent_Contig_3402	81	0.002943	11893	0.9821
dDocent_Contig_4247	276	0.002948	12040	0.9821
dDocent_Contig_6189	271	0.002955	11845	0.9821
dDocent_Contig_5077	118	0.002994	11689	0.9821
dDocent_Contig_9381	190	0.003133	11329	0.9821
dDocent_Contig_35978	269	0.003278	10675	0.9821
dDocent_Contig_19513	23	0.003282	10664	0.9821
dDocent_Contig_2308	257	0.003299	10609	0.9821
dDocent_Contig_31430	267	0.003383	10345	0.9821
dDocent_Contig_36799	182	0.003555	9844	0.9821
dDocent_Contig_8715	70	0.003621	9664	0.9821
dDocent_Contig_4909	118	0.00364	9614	0.9821
dDocent_Contig_5637	15	0.003675	9524	0.9821
dDocent_Contig_5966	277	0.003688	9624	0.9821
dDocent_Contig_33680	258	0.003745	9344	0.9821
dDocent_Contig_34862	93	0.00379	9234	0.9821
dDocent_Contig_1021	181	0.003832	9264	0.9821
dDocent_Contig_41419	37	0.003861	9064	0.9821
dDocent_Contig_14110	16	0.003886	9134	0.9821
dDocent_Contig_37443	40	0.003903	9094	0.9821
dDocent_Contig_13940	14	0.00391	8950	0.9821
dDocent_Contig_6042	205	0.003994	8887	0.9821
dDocent_Contig_37033	49	0.004043	8779	0.9821
dDocent_Contig_18659	166	0.004066	8608	0.9821
dDocent_Contig_36116	251	0.004066	8608	0.9821
dDocent_Contig_10315	71	0.004126	8482	0.9821
dDocent_Contig_3231	165	0.00413	8473	0.9821
dDocent_Contig_37762	99	0.004145	8563	0.9821
dDocent_Contig_16430	93	0.004148	8437	0.9821
dDocent_Contig_14832	18	0.004161	8410	0.9821
dDocent_Contig_14832	42	0.004161	8410	0.9821
dDocent_Contig_26078	214	0.004161	8410	0.9821
dDocent_Contig_21124	244	0.004206	8320	0.9821
dDocent_Contig_17443	225	0.004229	8275	0.9821
dDocent_Contig_25362	273	0.004309	8122	0.9821
dDocent_Contig_22710	185	0.004385	7981	0.9821
dDocent_Contig_3883	215	0.004456	7965	0.9821
dDocent_Contig_13680	90	0.004521	7741	0.9821
dDocent_Contig_12784	200	0.004554	7685	0.9821
dDocent_Contig_47025	39	0.004645	7749	0.9821
dDocent_Contig_35638	167	0.004655	7517	0.9821
dDocent_Contig_16843	246	0.00466	7509	0.9821
dDocent_Contig_6341	109	0.004716	7421	0.9821
dDocent_Contig_15541	263	0.004788	7309	0.9821
dDocent_Contig_17140	181	0.004884	7165	0.9821
dDocent_Contig_8221	247	0.004912	7125	0.9821
dDocent_Contig_17786	262	0.005031	6956	0.9821
dDocent_Contig_17518	10	0.005077	6991	0.9821
dDocent_Contig_4574	47	0.005123	6928	0.9821
dDocent_Contig_30402	138	0.005281	6627	0.9821
dDocent_Contig_1574	34	0.005286	6620	0.9821
dDocent_Contig_34951	42	0.005371	6515	0.9821
dDocent_Contig_36602	197	0.005436	6438	0.9821
dDocent_Contig_17097	259	0.005472	6487	0.9821
dDocent_Contig_22044	134	0.005644	6200	0.9821
dDocent_Contig_5303	226	0.00568	6249	0.9821
dDocent_Contig_5303	231	0.00568	6249	0.9821
dDocent_Contig_34862	58	0.005722	6116	0.9821
dDocent_Contig_23976	89	0.005784	6137	0.9821
dDocent_Contig_22365	242	0.005834	5998	0.9821
dDocent_Contig_33003	165	0.00584	5992	0.9821
dDocent_Contig_33003	182	0.00584	5992	0.9821
dDocent_Contig_15146	186	0.005846	5986	0.9821
dDocent_Contig_28333	83	0.005846	5986	0.9821
dDocent_Contig_25004	113	0.005857	6060	0.9821
dDocent_Contig_30978	141	0.005893	5938	0.9821
dDocent_Contig_493	175	0.005899	5932	0.9821
dDocent_Contig_32318	155	0.006059	5776	0.9821
dDocent_Contig_2642	57	0.006077	5758	0.9821
dDocent_Contig_21748	199	0.006129	5710	0.9821
dDocent_Contig_15776	194	0.006447	5350	0.9821
dDocent_Contig_1061	44	0.006484	5320	0.9821
dDocent_Contig_1061	56	0.006484	5320	0.9821
dDocent_Contig_22561	245	0.006521	5290	0.9821
dDocent_Contig_5675	200	0.00657	5326	0.9821
dDocent_Contig_4442	185	0.006695	5152	0.9821
dDocent_Contig_21855	51	0.006742	5116	0.9821
dDocent_Contig_18050	125	0.00675	5110	0.9821
dDocent_Contig_8538	24	0.006766	5098	0.9821
dDocent_Contig_26012	254	0.00679	5080	0.9821
dDocent_Contig_13457	272	0.006888	5080	0.9821
dDocent_Contig_3410	85	0.006987	5008	0.9821
dDocent_Contig_13450	136	0.007138	4832	0.9821
dDocent_Contig_10242	264	0.007146	4827	0.9821
dDocent_Contig_32059	201	0.007146	4897	0.9821
dDocent_Contig_5361	208	0.00719	4797	0.9821
dDocent_Contig_45930	179	0.007399	4662	0.9821
dDocent_Contig_601	29	0.007415	4652	0.9821
dDocent_Contig_31360	53	0.007455	4627	0.9821
dDocent_Contig_34396	28	0.007503	4597	0.9821
dDocent_Contig_30933	134	0.007528	4582	0.9821
dDocent_Contig_13462	181	0.007569	4557	0.9821
dDocent_Contig_24911	201	0.007595	4607	0.9821
dDocent_Contig_33455	221	0.007636	4517	0.9821
dDocent_Contig_34426	254	0.007722	4467	0.9821
dDocent_Contig_204	238	0.007783	4432	0.9821
dDocent_Contig_17518	206	0.007907	4362	0.9821
dDocent_Contig_39670	134	0.007926	4352	0.9821
dDocent_Contig_847	182	0.007935	4347	0.9821
dDocent_Contig_964	17	0.007967	4392	0.9821
dDocent_Contig_21586	7	0.008238	4187	0.9821
dDocent_Contig_39607	284	0.008287	4162	0.9821
dDocent_Contig_50602	8	0.008367	4182	0.9821
dDocent_Contig_40542	77	0.008419	4097	0.9821
dDocent_Contig_15541	186	0.008608	4007	0.9821
dDocent_Contig_6101	188	0.008759	3938	0.9821
dDocent_Contig_45677	173	0.008785	3926	0.9821
dDocent_Contig_4247	263	0.008858	3894	0.9821
dDocent_Contig_29038	124	0.008922	3866	0.9821
dDocent_Contig_20418	212	0.00894	3858	0.9821
dDocent_Contig_29133	51	0.009024	3822	0.9821
dDocent_Contig_5757	193	0.009053	3810	0.9821
dDocent_Contig_16317	38	0.009174	3814	0.9821
dDocent_Contig_54097	154	0.009188	3754	0.9821
dDocent_Contig_26046	201	0.009347	3690	0.9821
dDocent_Contig_31045	104	0.009398	3670	0.9821
dDocent_Contig_18667	54	0.009481	3638	0.9821
dDocent_Contig_47526	69	0.009491	3634	0.9821
dDocent_Contig_36901	277	0.009502	3630	0.9821
dDocent_Contig_12855	219	0.009503	3682	0.9821
dDocent_Contig_2191	192	0.009618	3586	0.9821
dDocent_Contig_8538	169	0.01009	3418	0.9821
dDocent_Contig_22265	88	0.01013	3406	0.9821
dDocent_Contig_14165	14	0.0102	3382	0.9821
dDocent_Contig_55191	190	0.0103	3398	0.9821
dDocent_Contig_57761	178	0.01036	3330	0.9821
dDocent_Contig_21551	255	0.01045	3302	0.9821
dDocent_Contig_41514	284	0.01045	3302	0.9821
dDocent_Contig_11249	36	0.01047	3294	0.9821
dDocent_Contig_3439	212	0.01047	3342	0.9821
dDocent_Contig_2299	165	0.01051	3282	0.9821
dDocent_Contig_48312	25	0.01052	3326	0.9821
dDocent_Contig_39835	224	0.01055	3318	0.9821
dDocent_Contig_21875	214	0.01057	3262	0.9821
dDocent_Contig_21875	237	0.01057	3262	0.9821
dDocent_Contig_11611	159	0.01063	3246	0.9821
dDocent_Contig_14317	270	0.01088	3170	0.9821
dDocent_Contig_27913	210	0.01089	3166	0.9821
dDocent_Contig_15991	176	0.01095	3194	0.9821
dDocent_Contig_9441	23	0.01098	3142	0.9821
dDocent_Contig_29406	133	0.01101	3178	0.9821
dDocent_Contig_20418	117	0.01105	3166	0.9821
dDocent_Contig_48912	109	0.01106	3118	0.9821
dDocent_Contig_13045	217	0.01115	3094	0.9821
dDocent_Contig_13045	262	0.01115	3094	0.9821
dDocent_Contig_3447	232	0.01118	3086	0.9821
dDocent_Contig_44166	243	0.01126	3062	0.9821
dDocent_Contig_11387	249	0.01134	3042	0.9821
dDocent_Contig_11387	266	0.01134	3042	0.9821
dDocent_Contig_21264	118	0.01134	3042	0.9821
dDocent_Contig_21264	180	0.01134	3042	0.9821
dDocent_Contig_22796	152	0.01134	3042	0.9821
dDocent_Contig_44932	257	0.01137	3034	0.9821
dDocent_Contig_11621	250	0.01149	3002	0.9821
dDocent_Contig_57777	247	0.01149	3002	0.9821
dDocent_Contig_57777	269	0.01149	3002	0.9821
dDocent_Contig_42657	166	0.01151	2996	0.9821
dDocent_Contig_8941	231	0.01151	2996	0.9821
dDocent_Contig_35780	62	0.01157	2981	0.9821
dDocent_Contig_1228	10	0.01164	2963	0.9821
dDocent_Contig_15267	218	0.01175	2936	0.9821
dDocent_Contig_9321	253	0.01175	2978	0.9821
dDocent_Contig_17518	169	0.01181	2921	0.9821
dDocent_Contig_40306	211	0.01181	2921	0.9821
dDocent_Contig_24305	111	0.01188	2903	0.9821
dDocent_Contig_4081	55	0.01189	2900	0.9821
dDocent_Contig_8771	286	0.0119	2897	0.9821
dDocent_Contig_21539	163	0.01195	2885	0.9821
dDocent_Contig_28969	55	0.01198	2879	0.9821
dDocent_Contig_4843	152	0.012	2873	0.9821
dDocent_Contig_9017	102	0.012	2873	0.9821
dDocent_Contig_9452	90	0.012	2873	0.9821
dDocent_Contig_42275	83	0.01205	2903	0.9821
dDocent_Contig_17278	258	0.01209	2894	0.9821
dDocent_Contig_22860	193	0.01214	2882	0.9821
dDocent_Contig_20622	91	0.01217	2834	0.9821
dDocent_Contig_31191	211	0.01218	2873	0.9821
dDocent_Contig_6557	201	0.0122	2867	0.9821
dDocent_Contig_27775	114	0.0123	2804	0.9821
dDocent_Contig_5189	201	0.01234	2795	0.9821
dDocent_Contig_26978	34	0.01235	2792	0.9821
dDocent_Contig_3420	242	0.01238	2786	0.9821
dDocent_Contig_11264	29	0.01243	2774	0.9821
dDocent_Contig_28996	216	0.01243	2774	0.9821
dDocent_Contig_2943	265	0.01243	2774	0.9821
dDocent_Contig_23083	160	0.01245	2771	0.9821
dDocent_Contig_26969	47	0.01249	2762	0.9821
dDocent_Contig_23997	224	0.01253	2753	0.9821
dDocent_Contig_27116	34	0.01254	2750	0.9821
dDocent_Contig_49156	270	0.01254	2750	0.9821
dDocent_Contig_33394	249	0.01258	2741	0.9821
dDocent_Contig_9271	168	0.0126	2738	0.9821
dDocent_Contig_18859	28	0.01261	2735	0.9821
dDocent_Contig_7379	215	0.01261	2735	0.9821
dDocent_Contig_15043	279	0.01263	2771	0.9821
dDocent_Contig_25594	221	0.01265	2765	0.9821
dDocent_Contig_36682	56	0.01265	2726	0.9821
dDocent_Contig_53735	64	0.01268	2720	0.9821
dDocent_Contig_6969	90	0.01269	2717	0.9821
dDocent_Contig_43382	286	0.01274	2747	0.9821
dDocent_Contig_3942	185	0.01275	2744	0.9821
dDocent_Contig_13125	134	0.01282	2690	0.9821
dDocent_Contig_12032	104	0.01283	2687	0.9821
dDocent_Contig_3607	89	0.01283	2687	0.9821
dDocent_Contig_16807	223	0.01291	2672	0.9821
dDocent_Contig_20069	205	0.01298	2657	0.9821
dDocent_Contig_21598	107	0.01298	2657	0.9821
dDocent_Contig_31316	176	0.01298	2657	0.9821
dDocent_Contig_3496	174	0.01307	2639	0.9821
dDocent_Contig_4576	57	0.0131	2633	0.9821
dDocent_Contig_39580	186	0.01314	2624	0.9821
dDocent_Contig_49744	176	0.0132	2612	0.9821
dDocent_Contig_629	152	0.0132	2612	0.9821
dDocent_Contig_15275	232	0.01333	2588	0.9821
dDocent_Contig_16163	258	0.01334	2585	0.9821
dDocent_Contig_19007	126	0.01336	2582	0.9821
dDocent_Contig_19493	169	0.01336	2618	0.9821
dDocent_Contig_14545	272	0.01343	2567	0.9821
dDocent_Contig_3566	119	0.01343	2606	0.9821
dDocent_Contig_14742	164	0.01348	2558	0.9821
dDocent_Contig_57769	211	0.01349	2594	0.9821
dDocent_Contig_47489	210	0.0135	2591	0.9821
dDocent_Contig_8932	74	0.01353	2549	0.9821
dDocent_Contig_39666	54	0.01355	2546	0.9821
dDocent_Contig_30623	167	0.01361	2570	0.9821
dDocent_Contig_12915	266	0.01366	2561	0.9821
dDocent_Contig_1633	28	0.01367	2522	0.9821
dDocent_Contig_1633	94	0.01367	2522	0.9821
dDocent_Contig_1029	202	0.01376	2507	0.9821
dDocent_Contig_31985	61	0.01376	2507	0.9821
dDocent_Contig_31985	116	0.01376	2507	0.9821
dDocent_Contig_13726	9	0.01387	2486	0.9821
dDocent_Contig_17652	164	0.01389	2483	0.9821
dDocent_Contig_17322	52	0.01394	2510	0.9821
dDocent_Contig_6212	185	0.01394	2474	0.9821
dDocent_Contig_1137	68	0.01397	2468	0.9821
dDocent_Contig_25548	244	0.01399	2465	0.9821
dDocent_Contig_20418	7	0.01401	2462	0.9821
dDocent_Contig_3222	229	0.01402	2459	0.9821
dDocent_Contig_16956	53	0.01406	2453	0.9821
dDocent_Contig_15090	131	0.01407	2486	0.9821
dDocent_Contig_10464	52	0.01411	2480	0.9821
dDocent_Contig_12034	101	0.01411	2480	0.9821
dDocent_Contig_10242	160	0.01421	2462	0.9821
dDocent_Contig_1952	124	0.01423	2423	0.9821
dDocent_Contig_20763	87	0.01427	2417	0.9821
dDocent_Contig_6688	274	0.01429	2414	0.9821
dDocent_Contig_31045	68	0.0143	2447	0.9821
dDocent_Contig_11820	269	0.01435	2438	0.9821
dDocent_Contig_19825	245	0.01435	2438	0.9821
dDocent_Contig_15930	284	0.01441	2393	0.9821
dDocent_Contig_5605	180	0.01441	2393	0.9821
dDocent_Contig_18727	236	0.01444	2423	0.9821
dDocent_Contig_44953	93	0.01445	2387	0.9821
dDocent_Contig_19329	83	0.01448	2381	0.9821
dDocent_Contig_30508	16	0.01448	2381	0.9821
dDocent_Contig_29222	192	0.01454	2441	0.9821
dDocent_Contig_11356	9	0.01458	2366	0.9821
dDocent_Contig_13631	274	0.01458	2366	0.9821
dDocent_Contig_6947	121	0.01467	2351	0.9821
dDocent_Contig_2656	168	0.01469	2348	0.9821
dDocent_Contig_4081	17	0.01469	2348	0.9821
dDocent_Contig_602	239	0.01469	2348	0.9821
dDocent_Contig_8962	89	0.01469	2348	0.9821
dDocent_Contig_7407	55	0.01481	2363	0.9821
dDocent_Contig_6025	38	0.01482	2327	0.9821
dDocent_Contig_37436	82	0.01486	2321	0.9821
dDocent_Contig_10242	283	0.0149	2315	0.9821
dDocent_Contig_14177	62	0.01495	2306	0.9821
dDocent_Contig_48014	26	0.01495	2306	0.9821
dDocent_Contig_21424	43	0.01499	2300	0.9821
dDocent_Contig_43165	77	0.01499	2300	0.9821
dDocent_Contig_52641	236	0.01499	2300	0.9821
dDocent_Contig_15085	50	0.01502	2330	0.9821
dDocent_Contig_19282	208	0.01502	2330	0.9821
dDocent_Contig_13290	175	0.01507	2288	0.9821
dDocent_Contig_41619	208	0.01509	2318	0.9821
dDocent_Contig_41619	257	0.01509	2318	0.9821
dDocent_Contig_41619	276	0.01509	2318	0.9821
dDocent_Contig_28049	236	0.01517	2273	0.9821
dDocent_Contig_32027	26	0.01525	2261	0.9821
dDocent_Contig_54105	181	0.01529	2255	0.9821
dDocent_Contig_50195	201	0.01531	2252	0.9821
dDocent_Contig_44409	165	0.01545	2264	0.9821
dDocent_Contig_31674	83	0.01549	2258	0.9821
dDocent_Contig_464	41	0.01552	2222	0.9821
dDocent_Contig_55997	111	0.01562	2207	0.9821
dDocent_Contig_2402	32	0.01567	2201	0.9821
dDocent_Contig_19274	279	0.01571	2195	0.9821
dDocent_Contig_5874	10	0.01575	2189	0.9821
dDocent_Contig_12104	240	0.01585	2207	0.9821
dDocent_Contig_1175	194	0.01588	2171	0.9821
dDocent_Contig_1175	223	0.01588	2171	0.9821
dDocent_Contig_12854	135	0.01588	2171	0.9821
dDocent_Contig_31920	127	0.01592	2198	0.9821
dDocent_Contig_38103	88	0.01593	2165	0.9821
dDocent_Contig_53644	21	0.01593	2165	0.9821
dDocent_Contig_19238	131	0.01595	2162	0.9821
dDocent_Contig_41275	222	0.01599	2156	0.9821
dDocent_Contig_44085	8	0.01609	2174	0.9821
dDocent_Contig_17630	208	0.01613	2138	0.9821
dDocent_Contig_2656	122	0.01618	2162	0.9821
dDocent_Contig_13217	28	0.0162	2159	0.9821
dDocent_Contig_37183	27	0.01627	2150	0.9821
dDocent_Contig_45235	193	0.01627	2120	0.9821
dDocent_Contig_9351	171	0.01629	2147	0.9821
dDocent_Contig_15741	162	0.01641	2132	0.9821
dDocent_Contig_1456	123	0.01648	2093	0.9821
dDocent_Contig_22073	19	0.01648	2093	0.9821
dDocent_Contig_11550	301	0.01655	2084	0.9821
dDocent_Contig_42284	100	0.01664	2102	0.9821
dDocent_Contig_43165	182	0.01664	2072	0.9821
dDocent_Contig_6437	179	0.01686	2045	0.9821
dDocent_Contig_11282	262	0.01696	2033	0.9821
dDocent_Contig_29478	157	0.01699	2030	0.9821
dDocent_Contig_897	10	0.01701	2027	0.9821
dDocent_Contig_9992	115	0.01706	2021	0.9821
dDocent_Contig_10072	183	0.01711	2015	0.9821
dDocent_Contig_18987	114	0.01711	2015	0.9821
dDocent_Contig_34771	38	0.01713	2042	0.9821
dDocent_Contig_27840	83	0.01714	2012	0.9821
dDocent_Contig_25284	179	0.01716	2009	0.9821
dDocent_Contig_10207	63	0.01728	2024	0.9821
dDocent_Contig_35928	285	0.01728	2024	0.9821
dDocent_Contig_15997	189	0.0174	1982	0.9821
dDocent_Contig_14333	79	0.01747	1974	0.9821
dDocent_Contig_15720	211	0.01747	1974	0.9821
dDocent_Contig_6874	142	0.01749	1972	0.9821
dDocent_Contig_5277	269	0.0175	1970	0.9821
dDocent_Contig_22499	27	0.01763	1956	0.9821
dDocent_Contig_26296	270	0.01768	1950	0.9821
dDocent_Contig_25871	221	0.0177	1948	0.9821
dDocent_Contig_4247	165	0.01779	1938	0.9821
dDocent_Contig_21709	202	0.01796	1948	0.9821
dDocent_Contig_21709	251	0.01796	1948	0.9821
dDocent_Contig_22620	64	0.01802	1914	0.9821
dDocent_Contig_11111	266	0.01803	1940	0.9821
dDocent_Contig_35407	99	0.01803	1940	0.9821
dDocent_Contig_25548	181	0.01811	1932	0.9821
dDocent_Contig_19703	84	0.01843	1898	0.9821
dDocent_Contig_2322	197	0.01848	1866	0.9821
dDocent_Contig_7118	277	0.01854	1860	0.9821
dDocent_Contig_49300	282	0.01867	1874	0.9821
dDocent_Contig_17518	35	0.01885	1856	0.9821
dDocent_Contig_12993	179	0.01888	1826	0.9821
dDocent_Contig_19926	100	0.01888	1826	0.9821
dDocent_Contig_16244	187	0.0189	1824	0.9821
dDocent_Contig_2488	122	0.01899	1816	0.9821
dDocent_Contig_20096	264	0.01903	1838	0.9821
dDocent_Contig_23655	18	0.01903	1812	0.9821
dDocent_Contig_39853	120	0.01905	1836	0.9821
dDocent_Contig_49372	191	0.01909	1806	0.9821
dDocent_Contig_42738	258	0.01916	1826	0.9821
dDocent_Contig_31322	124	0.01918	1798	0.9821
dDocent_Contig_44323	98	0.0192	1822	0.9821
dDocent_Contig_52410	266	0.01922	1794	0.9821
dDocent_Contig_21093	261	0.01924	1818	0.9821
dDocent_Contig_57777	180	0.01926	1816	0.9821
dDocent_Contig_57777	234	0.01926	1816	0.9821
dDocent_Contig_12357	43	0.01933	1810	0.9821
dDocent_Contig_40141	80	0.01933	1784	0.9821
dDocent_Contig_24832	213	0.01935	1782	0.9821
dDocent_Contig_7961	130	0.01941	1776	0.9821
dDocent_Contig_39627	154	0.01959	1760	0.9821
dDocent_Contig_2554	102	0.01961	1758	0.9821
dDocent_Contig_15950	63	0.01966	1754	0.9821
dDocent_Contig_40816	92	0.01966	1754	0.9821
dDocent_Contig_16235	177	0.01968	1752	0.9821
dDocent_Contig_34392	75	0.01975	1746	0.9821
dDocent_Contig_11815	123	0.01988	1734	0.9821
dDocent_Contig_39553	110	0.02002	1722	0.9821
dDocent_Contig_6877	245	0.02017	1734	0.9821
dDocent_Contig_6877	257	0.02017	1734	0.9821
dDocent_Contig_45263	235	0.02021	1706	0.9821
dDocent_Contig_17996	20	0.02036	1718	0.9821
dDocent_Contig_20387	164	0.0205	1682	0.9821
dDocent_Contig_3062	125	0.0206	1674	0.9821
dDocent_Contig_5814	78	0.0207	1690	0.9821
dDocent_Contig_8571	22	0.02072	1664	0.9821
dDocent_Contig_34396	187	0.02092	1648	0.9821
dDocent_Contig_21855	89	0.02116	1606	0.9821
dDocent_Contig_19229	104	0.02121	1602	0.9821
dDocent_Contig_19229	186	0.02121	1602	0.9821
dDocent_Contig_32838	184	0.02122	1648	0.9821
dDocent_Contig_37235	56	0.02126	1622	0.9821
dDocent_Contig_42355	174	0.02126	1622	0.9821
dDocent_Contig_21004	161	0.0213	1642	0.9821
dDocent_Contig_18827	39	0.02132	1594	0.9821
dDocent_Contig_2023	255	0.02138	1636	0.9821
dDocent_Contig_13834	282	0.02139	1612	0.9821
dDocent_Contig_28518	46	0.02139	1612	0.9821
dDocent_Contig_13422	92	0.0214	1588	0.9821
dDocent_Contig_27035	160	0.02145	1584	0.9821
dDocent_Contig_17496	169	0.02148	1582	0.9821
dDocent_Contig_27356	90	0.02158	1598	0.9821
dDocent_Contig_25162	121	0.0216	1596	0.9821
dDocent_Contig_53374	91	0.02164	1570	0.9821
dDocent_Contig_53374	205	0.02164	1570	0.9821
dDocent_Contig_14933	230	0.02177	1584	0.9821
dDocent_Contig_2642	95	0.02179	1582	0.9821
dDocent_Contig_23738	155	0.02181	1558	0.9821
dDocent_Contig_11279	87	0.02184	1556	0.9821
dDocent_Contig_38811	183	0.02188	1576	0.9821
dDocent_Contig_6279	189	0.02188	1576	0.9821
dDocent_Contig_15282	239	0.02189	1552	0.9821
dDocent_Contig_22265	222	0.02192	1550	0.9821
dDocent_Contig_27083	24	0.02195	1548	0.9821
dDocent_Contig_22044	197	0.02212	1536	0.9821
dDocent_Contig_42020	24	0.02212	1536	0.9821
dDocent_Contig_9271	161	0.02216	1556	0.9821
dDocent_Contig_38477	86	0.02244	1514	0.9821
dDocent_Contig_41844	176	0.0225	1532	0.9821
dDocent_Contig_7068	33	0.02256	1528	0.9821
dDocent_Contig_9168	42	0.02256	1528	0.9821
dDocent_Contig_18591	259	0.02262	1502	0.9821
dDocent_Contig_1180	278	0.02265	1500	0.9821
dDocent_Contig_21051	222	0.02271	1496	0.9821
dDocent_Contig_44166	249	0.02277	1514	0.9821
dDocent_Contig_33345	64	0.0228	1512	0.9821
dDocent_Contig_11477	96	0.02283	1510	0.9821
dDocent_Contig_10166	119	0.02305	1474	0.9821
dDocent_Contig_44534	69	0.02326	1482	0.9821
dDocent_Contig_33868	238	0.02334	1456	0.9821
dDocent_Contig_18127	273	0.02359	1440	0.9821
dDocent_Contig_54029	199	0.02359	1440	0.9821
dDocent_Contig_1064	64	0.02374	1452	0.9821
dDocent_Contig_6245	264	0.02381	1448	0.9821
dDocent_Contig_2109	64	0.02416	1406	0.9821
dDocent_Contig_29234	195	0.02421	1424	0.9821
dDocent_Contig_638	286	0.02434	1396	0.9821
dDocent_Contig_27312	115	0.02435	1416	0.9821
dDocent_Contig_43564	13	0.02448	1388	0.9821
dDocent_Contig_14858	68	0.02451	1386	0.9821
dDocent_Contig_21124	211	0.02451	1386	0.9821
dDocent_Contig_17847	258	0.02458	1382	0.9821
dDocent_Contig_34926	93	0.02466	1378	0.9821
dDocent_Contig_38890	161	0.02476	1372	0.9821
dDocent_Contig_38890	168	0.02476	1372	0.9821
dDocent_Contig_15961	170	0.02484	1368	0.9821
dDocent_Contig_9292	66	0.02487	1366	0.9821
dDocent_Contig_9292	256	0.02487	1366	0.9821
dDocent_Contig_24260	87	0.02491	1384	0.9821
dDocent_Contig_9936	165	0.02491	1384	0.9821
dDocent_Contig_8946	261	0.02502	1358	0.9821
dDocent_Contig_45864	258	0.02505	1376	0.9821
dDocent_Contig_18894	263	0.02509	1354	0.9821
dDocent_Contig_37470	116	0.02517	1350	0.9821
dDocent_Contig_29190	264	0.02523	1386	0.9821
dDocent_Contig_2434	116	0.02535	1360	0.9821
dDocent_Contig_50216	255	0.02539	1338	0.9821
dDocent_Contig_30840	65	0.02542	1356	0.9821
dDocent_Contig_45894	105	0.02547	1334	0.9821
dDocent_Contig_20971	273	0.02551	1332	0.9821
dDocent_Contig_12528	95	0.02577	1338	0.9821
dDocent_Contig_21630	199	0.02586	1314	0.9821
dDocent_Contig_20606	129	0.02596	1328	0.9821
dDocent_Contig_10098	96	0.02604	1324	0.9821
dDocent_Contig_10098	137	0.02604	1324	0.9821
dDocent_Contig_1324	164	0.02604	1324	0.9821
dDocent_Contig_22731	49	0.02612	1320	0.9821
dDocent_Contig_8320	113	0.02621	1296	0.9821
dDocent_Contig_32602	154	0.02638	1288	0.9821
dDocent_Contig_10417	30	0.02642	1286	0.9821
dDocent_Contig_16427	274	0.02642	1286	0.9821
dDocent_Contig_29798	9	0.02642	1286	0.9821
dDocent_Contig_33546	280	0.02642	1286	0.9821
dDocent_Contig_18258	60	0.02646	1284	0.9821
dDocent_Contig_23058	208	0.02648	1302	0.9821
dDocent_Contig_50843	124	0.02648	1302	0.9821
dDocent_Contig_13776	285	0.0265	1282	0.9821
dDocent_Contig_44001	18	0.02654	1280	0.9821
dDocent_Contig_44001	89	0.02654	1280	0.9821
dDocent_Contig_8688	91	0.0266	1296	0.9821
dDocent_Contig_2861	35	0.02662	1276	0.9821
dDocent_Contig_2135	222	0.02664	1294	0.9821
dDocent_Contig_27089	123	0.02664	1294	0.9821
dDocent_Contig_6516	183	0.02664	1294	0.9821
dDocent_Contig_44597	31	0.02667	1274	0.9821
dDocent_Contig_27613	173	0.02684	1266	0.9821
dDocent_Contig_15350	30	0.02685	1284	0.9821
dDocent_Contig_14544	9	0.02692	1262	0.9821
dDocent_Contig_32431	119	0.02706	1274	0.9821
dDocent_Contig_36890	208	0.02709	1254	0.9821
dDocent_Contig_11718	273	0.02727	1264	0.9821
dDocent_Contig_36890	186	0.02731	1244	0.9821
dDocent_Contig_39476	50	0.02731	1244	0.9821
dDocent_Contig_40593	70	0.0274	1240	0.9821
dDocent_Contig_40879	281	0.02744	1238	0.9821
dDocent_Contig_40879	286	0.02744	1238	0.9821
dDocent_Contig_5428	16	0.02744	1238	0.9821
dDocent_Contig_27568	183	0.02749	1236	0.9821
dDocent_Contig_1438	161	0.02762	1230	0.9821
dDocent_Contig_2146	276	0.02762	1230	0.9821
dDocent_Contig_26127	75	0.02776	1242	0.9821
dDocent_Contig_19201	86	0.0278	1240	0.9821
dDocent_Contig_48018	274	0.0278	1240	0.9821
dDocent_Contig_8175	199	0.0278	1240	0.9821
dDocent_Contig_10618	36	0.02785	1220	0.9821
dDocent_Contig_24426	243	0.02789	1236	0.9821
dDocent_Contig_27044	196	0.02794	1216	0.9821
dDocent_Contig_3085	187	0.02807	1228	0.9821
dDocent_Contig_14082	200	0.02808	1210	0.9821
dDocent_Contig_55220	90	0.02808	1210	0.9821
dDocent_Contig_28680	103	0.02812	1208	0.9821
dDocent_Contig_32200	141	0.02817	1206	0.9821
dDocent_Contig_9452	140	0.02817	1206	0.9821
dDocent_Contig_27898	99	0.02826	1202	0.9821
dDocent_Contig_1886	47	0.02858	1206	0.9821
dDocent_Contig_12330	70	0.02864	1186	0.9821
dDocent_Contig_35558	94	0.02864	1186	0.9821
dDocent_Contig_37139	214	0.02864	1186	0.9821
dDocent_Contig_19482	124	0.02868	1202	0.9821
dDocent_Contig_15670	218	0.02869	1184	0.9821
dDocent_Contig_16122	22	0.02869	1184	0.9821
dDocent_Contig_43721	105	0.02869	1184	0.9821
dDocent_Contig_10881	74	0.02874	1182	0.9821
dDocent_Contig_21072	178	0.02882	1196	0.9821
dDocent_Contig_32375	22	0.02884	1178	0.9821
dDocent_Contig_22011	205	0.02892	1192	0.9821
dDocent_Contig_17503	64	0.02899	1172	0.9821
dDocent_Contig_28612	141	0.02899	1172	0.9821
dDocent_Contig_3188	291	0.02899	1172	0.9821
dDocent_Contig_37083	139	0.02899	1172	0.9821
dDocent_Contig_37033	216	0.02902	1188	0.9821
dDocent_Contig_11092	188	0.02904	1170	0.9821
dDocent_Contig_25495	124	0.02911	1184	0.9821
dDocent_Contig_20919	277	0.02913	1166	0.9821
dDocent_Contig_21748	259	0.02913	1166	0.9821
dDocent_Contig_26448	56	0.02913	1166	0.9821
dDocent_Contig_4552	100	0.02913	1166	0.9821
dDocent_Contig_10473	132	0.02918	1164	0.9821
dDocent_Contig_20422	103	0.02918	1164	0.9821
dDocent_Contig_2715	114	0.02918	1164	0.9821
dDocent_Contig_17183	76	0.02921	1180	0.9821
dDocent_Contig_32739	165	0.02929	1160	0.9821
dDocent_Contig_31138	287	0.02936	1174	0.9821
dDocent_Contig_36057	247	0.02939	1156	0.9821
dDocent_Contig_11451	41	0.02949	1152	0.9821
dDocent_Contig_17574	184	0.02949	1152	0.9821
dDocent_Contig_2736	222	0.02949	1152	0.9821
dDocent_Contig_9510	41	0.02961	1164	0.9821
dDocent_Contig_9510	214	0.02961	1164	0.9821
dDocent_Contig_429	122	0.02975	1142	0.9821
dDocent_Contig_8607	101	0.02975	1142	0.9821
dDocent_Contig_16296	21	0.0298	1140	0.9821
dDocent_Contig_445	58	0.0298	1140	0.9821
dDocent_Contig_15317	96	0.02987	1154	0.9821
dDocent_Contig_15766	206	0.02987	1154	0.9821
dDocent_Contig_22001	60	0.02987	1154	0.9821
dDocent_Contig_1317	235	0.0299	1136	0.9821
dDocent_Contig_17662	175	0.0299	1136	0.9821
dDocent_Contig_22197	291	0.0299	1136	0.9821
dDocent_Contig_36682	262	0.0299	1136	0.9821
dDocent_Contig_12489	176	0.02992	1152	0.9821
dDocent_Contig_17374	92	0.02997	1150	0.9821
dDocent_Contig_10166	16	0.03001	1132	0.9821
dDocent_Contig_18063	164	0.03001	1132	0.9821
dDocent_Contig_34964	199	0.03001	1132	0.9821
dDocent_Contig_38135	242	0.03001	1132	0.9821
dDocent_Contig_6868	33	0.03006	1130	0.9821
dDocent_Contig_16447	271	0.03012	1128	0.9821
dDocent_Contig_6751	190	0.03022	1124	0.9821
dDocent_Contig_8940	208	0.03033	1120	0.9821
dDocent_Contig_28885	231	0.03038	1118	0.9821
dDocent_Contig_7384	179	0.03038	1118	0.9821
dDocent_Contig_34521	64	0.03044	1116	0.9821
dDocent_Contig_14305	118	0.03045	1132	0.9821
dDocent_Contig_41159	115	0.03055	1112	0.9821
dDocent_Contig_13422	141	0.0306	1110	0.9821
dDocent_Contig_8817	38	0.03066	1108	0.9821
dDocent_Contig_32642	23	0.03078	1120	0.9821
dDocent_Contig_32334	163	0.03083	1118	0.9821
dDocent_Contig_7316	192	0.03083	1102	0.9821
dDocent_Contig_14511	189	0.03094	1098	0.9821
dDocent_Contig_19033	280	0.03094	1098	0.9821
dDocent_Contig_30050	207	0.03094	1098	0.9821
dDocent_Contig_8716	173	0.03094	1098	0.9821
dDocent_Contig_12375	262	0.03111	1092	0.9821
dDocent_Contig_22912	38	0.03111	1092	0.9821
dDocent_Contig_28912	50	0.03111	1092	0.9821
dDocent_Contig_28912	228	0.03111	1092	0.9821
dDocent_Contig_3637	193	0.03111	1092	0.9821
dDocent_Contig_45495	36	0.03116	1090	0.9821
dDocent_Contig_48663	106	0.03116	1090	0.9821
dDocent_Contig_52461	265	0.03116	1090	0.9821
dDocent_Contig_5363	204	0.03117	1106	0.9821
dDocent_Contig_23810	125	0.03134	1084	0.9821
dDocent_Contig_25162	63	0.03134	1084	0.9821
dDocent_Contig_4986	163	0.03134	1084	0.9821
dDocent_Contig_9278	278	0.03134	1084	0.9821
dDocent_Contig_27007	222	0.03139	1082	0.9821
dDocent_Contig_2743	290	0.03139	1098	0.9821
dDocent_Contig_31188	8	0.03139	1098	0.9821
dDocent_Contig_36253	219	0.03139	1082	0.9821
dDocent_Contig_16010	57	0.03145	1080	0.9821
dDocent_Contig_34760	256	0.03145	1080	0.9821
dDocent_Contig_19309	26	0.03157	1076	0.9821
dDocent_Contig_24305	24	0.03169	1072	0.9821
dDocent_Contig_25593	282	0.03169	1072	0.9821
dDocent_Contig_10550	107	0.03174	1086	0.9821
dDocent_Contig_4713	253	0.03175	1070	0.9821
dDocent_Contig_432	166	0.0318	1084	0.9821
dDocent_Contig_6133	74	0.0318	1084	0.9821
dDocent_Contig_5075	20	0.03187	1066	0.9821
dDocent_Contig_11337	141	0.03191	1080	0.9821
dDocent_Contig_15054	77	0.03198	1062	0.9821
dDocent_Contig_21875	179	0.03198	1062	0.9821
dDocent_Contig_21875	188	0.03198	1062	0.9821
dDocent_Contig_21875	209	0.03198	1062	0.9821
dDocent_Contig_21875	223	0.03198	1062	0.9821
dDocent_Contig_21875	232	0.03198	1062	0.9821
dDocent_Contig_21875	248	0.03198	1062	0.9821
dDocent_Contig_21875	278	0.03198	1062	0.9821
dDocent_Contig_21875	286	0.03198	1062	0.9821
dDocent_Contig_23000	39	0.03198	1062	0.9821
dDocent_Contig_3665	125	0.03198	1062	0.9821
dDocent_Contig_45333	90	0.03198	1062	0.9821
dDocent_Contig_51118	241	0.03198	1062	0.9821
dDocent_Contig_52174	282	0.03198	1062	0.9821
dDocent_Contig_6909	227	0.03198	1062	0.9821
dDocent_Contig_8999	16	0.03198	1062	0.9821
dDocent_Contig_15498	287	0.03205	1060	0.9821
dDocent_Contig_38679	69	0.03209	1074	0.9821
dDocent_Contig_38679	79	0.03209	1074	0.9821
dDocent_Contig_38679	135	0.03209	1074	0.9821
dDocent_Contig_49081	132	0.03209	1074	0.9821
dDocent_Contig_13672	59	0.03211	1058	0.9821
dDocent_Contig_44047	111	0.03211	1058	0.9821
dDocent_Contig_12261	121	0.03221	1070	0.9821
dDocent_Contig_20583	123	0.03223	1054	0.9821
dDocent_Contig_1150	206	0.03229	1052	0.9821
dDocent_Contig_23320	198	0.03229	1052	0.9821
dDocent_Contig_18113	196	0.03235	1050	0.9821
dDocent_Contig_4034	64	0.03235	1050	0.9821
dDocent_Contig_43510	33	0.03235	1050	0.9821
dDocent_Contig_13439	85	0.03247	1046	0.9821
dDocent_Contig_16225	258	0.03247	1046	0.9821
dDocent_Contig_8253	254	0.03247	1046	0.9821
dDocent_Contig_42956	237	0.03252	1060	0.9821
dDocent_Contig_21205	43	0.03254	1044	0.9821
dDocent_Contig_6262	260	0.03254	1044	0.9821
dDocent_Contig_13682	33	0.0326	1042	0.9821
dDocent_Contig_49285	166	0.0326	1042	0.9821
dDocent_Contig_51106	104	0.0327	1054	0.9821
dDocent_Contig_7339	78	0.03272	1038	0.9821
dDocent_Contig_34795	153	0.03276	1052	0.9821
dDocent_Contig_18730	71	0.03279	1036	0.9821
dDocent_Contig_19502	152	0.03285	1034	0.9821
dDocent_Contig_1815	80	0.03291	1032	0.9821
dDocent_Contig_22153	256	0.03291	1032	0.9821
dDocent_Contig_22153	286	0.03291	1032	0.9821
dDocent_Contig_50654	181	0.03291	1032	0.9821
dDocent_Contig_1589	133	0.03295	1046	0.9821
dDocent_Contig_39793	257	0.03304	1028	0.9821
dDocent_Contig_5783	30	0.03304	1028	0.9821
dDocent_Contig_5783	37	0.03304	1028	0.9821
dDocent_Contig_5783	56	0.03304	1028	0.9821
dDocent_Contig_15852	125	0.03311	1026	0.9821
dDocent_Contig_37880	135	0.03311	1026	0.9821
dDocent_Contig_47144	225	0.03311	1026	0.9821
dDocent_Contig_22771	21	0.03324	1022	0.9821
dDocent_Contig_14258	197	0.0333	1020	0.9821
dDocent_Contig_39244	246	0.0333	1020	0.9821
dDocent_Contig_43747	253	0.0333	1020	0.9821
dDocent_Contig_5445	158	0.03333	1034	0.9821
dDocent_Contig_7622	128	0.03337	1018	0.9821
dDocent_Contig_3949	157	0.0334	1032	0.9821
dDocent_Contig_5485	113	0.03343	1016	0.9821
dDocent_Contig_51921	140	0.0335	1014	0.9821
dDocent_Contig_13366	209	0.03353	1028	0.9821
dDocent_Contig_29099	177	0.03353	1028	0.9821
dDocent_Contig_2699	180	0.03356	1012	0.9821
dDocent_Contig_21398	236	0.0337	1008	0.9821
dDocent_Contig_5645	285	0.0337	1008	0.9821
dDocent_Contig_10392	86	0.03372	1022	0.9821
dDocent_Contig_10139	98	0.03376	1006	0.9821
dDocent_Contig_2159	299	0.03376	1006	0.9821
dDocent_Contig_13603	82	0.03383	1004	0.9821
dDocent_Contig_13603	124	0.03383	1004	0.9821
dDocent_Contig_21748	44	0.0339	1002	0.9821
dDocent_Contig_34862	245	0.0339	1002	0.9821
dDocent_Contig_23110	111	0.03399	1014	0.9821
dDocent_Contig_673	137	0.03399	1014	0.9821
dDocent_Contig_673	255	0.03399	1014	0.9821
dDocent_Contig_638	230	0.03417	994	0.9821
dDocent_Contig_10245	254	0.03421	993	0.9821
dDocent_Contig_15280	186	0.03426	1006	0.9821
dDocent_Contig_19660	269	0.03426	1006	0.9821
dDocent_Contig_30201	200	0.03426	1006	0.9821
dDocent_Contig_56503	172	0.03426	1006	0.9821
dDocent_Contig_34824	177	0.03431	990	0.9821
dDocent_Contig_20579	209	0.03434	989	0.9821
dDocent_Contig_20579	266	0.03434	989	0.9821
dDocent_Contig_17263	37	0.03438	988	0.9821
dDocent_Contig_17510	218	0.03445	986	0.9821
dDocent_Contig_2426	155	0.03445	986	0.9821
dDocent_Contig_9002	80	0.03448	985	0.9821
dDocent_Contig_4281	185	0.03452	984	0.9821
dDocent_Contig_7715	100	0.03452	984	0.9821
dDocent_Contig_5193	127	0.03459	982	0.9821
dDocent_Contig_12199	214	0.03469	979	0.9821
dDocent_Contig_19174	209	0.03469	979	0.9821
dDocent_Contig_23767	22	0.03469	979	0.9821
dDocent_Contig_9558	133	0.03469	979	0.9821
dDocent_Contig_13885	285	0.03473	978	0.9821
dDocent_Contig_44001	78	0.03473	978	0.9821
dDocent_Contig_12919	241	0.03484	975	0.9821
dDocent_Contig_8171	27	0.03484	975	0.9821
dDocent_Contig_27366	223	0.03502	970	0.9821
dDocent_Contig_10847	25	0.03516	966	0.9821
dDocent_Contig_3076	80	0.03516	966	0.9821
dDocent_Contig_47367	72	0.03527	963	0.9821
dDocent_Contig_14411	194	0.03549	957	0.9821
dDocent_Contig_1468	92	0.03549	957	0.9821
dDocent_Contig_41601	176	0.03549	971	0.9821
dDocent_Contig_6594	230	0.03553	970	0.9821
dDocent_Contig_33333	158	0.03556	955	0.9821
dDocent_Contig_24352	47	0.03568	952	0.9821
dDocent_Contig_49006	6	0.03571	965	0.9821
dDocent_Contig_10951	267	0.03575	950	0.9821
dDocent_Contig_13806	31	0.03575	950	0.9821
dDocent_Contig_43101	49	0.03575	950	0.9821
dDocent_Contig_43260	22	0.03575	950	0.9821
dDocent_Contig_6919	105	0.03579	949	0.9821
dDocent_Contig_6467	266	0.0359	960	0.9821
dDocent_Contig_16276	250	0.03594	945	0.9821
dDocent_Contig_38344	203	0.03594	945	0.9821
dDocent_Contig_21063	166	0.03601	957	0.9821
dDocent_Contig_17638	116	0.03606	942	0.9821
dDocent_Contig_38725	217	0.03609	941	0.9821
dDocent_Contig_3284	64	0.0361	927	0.9821
dDocent_Contig_6991	13	0.0361	927	0.9821
dDocent_Contig_2388	136	0.03614	926	0.9821
dDocent_Contig_13241	218	0.03621	938	0.9821
dDocent_Contig_9120	227	0.03621	938	0.9821
dDocent_Contig_740	283	0.03622	924	0.9821
dDocent_Contig_2217	55	0.03633	921	0.9821
dDocent_Contig_37735	160	0.03633	921	0.9821
dDocent_Contig_6465	246	0.03633	921	0.9821
dDocent_Contig_10270	125	0.03636	934	0.9821
dDocent_Contig_14142	221	0.0364	933	0.9821
dDocent_Contig_11402	168	0.03641	919	0.9821
dDocent_Contig_13763	268	0.03641	919	0.9821
dDocent_Contig_15478	223	0.03641	919	0.9821
dDocent_Contig_19139	119	0.03641	919	0.9821
dDocent_Contig_25619	243	0.03641	919	0.9821
dDocent_Contig_33611	153	0.03641	919	0.9821
dDocent_Contig_36922	190	0.03641	919	0.9821
dDocent_Contig_40318	143	0.03641	919	0.9821
dDocent_Contig_46290	236	0.03641	919	0.9821
dDocent_Contig_15327	113	0.03645	918	0.9821
dDocent_Contig_11702	222	0.03649	917	0.9821
dDocent_Contig_45853	278	0.03649	917	0.9821
dDocent_Contig_49647	15	0.03653	916	0.9821
dDocent_Contig_51680	211	0.03653	916	0.9821
dDocent_Contig_13481	104	0.03657	915	0.9821
dDocent_Contig_28639	127	0.03659	942	0.9821
dDocent_Contig_3533	29	0.03665	913	0.9821
dDocent_Contig_8236	256	0.03665	913	0.9821
dDocent_Contig_42498	244	0.03669	912	0.9821
dDocent_Contig_31200	194	0.03672	925	0.9821
dDocent_Contig_58530	140	0.03672	925	0.9821
dDocent_Contig_16777	267	0.03673	911	0.9821
dDocent_Contig_1737	50	0.03673	911	0.9821
dDocent_Contig_25940	53	0.03673	911	0.9821
dDocent_Contig_41143	7	0.03673	911	0.9821
dDocent_Contig_41143	19	0.03673	911	0.9821
dDocent_Contig_41143	25	0.03673	911	0.9821
dDocent_Contig_41143	104	0.03673	911	0.9821
dDocent_Contig_41143	181	0.03673	911	0.9821
dDocent_Contig_5942	183	0.03673	911	0.9821
dDocent_Contig_24558	46	0.03677	910	0.9821
dDocent_Contig_6132	265	0.03677	910	0.9821
dDocent_Contig_17856	90	0.03681	909	0.9821
dDocent_Contig_30912	23	0.03681	909	0.9821
dDocent_Contig_38644	160	0.03684	922	0.9821
dDocent_Contig_25010	106	0.03685	908	0.9821
dDocent_Contig_14086	42	0.03689	907	0.9821
dDocent_Contig_22406	45	0.03689	907	0.9821
dDocent_Contig_4560	17	0.03689	907	0.9821
dDocent_Contig_37745	69	0.03692	920	0.9821
dDocent_Contig_16830	200	0.03693	906	0.9821
dDocent_Contig_31362	247	0.03696	919	0.9821
dDocent_Contig_36398	42	0.03696	919	0.9821
dDocent_Contig_13153	230	0.03698	905	0.9821
dDocent_Contig_18695	248	0.03698	905	0.9821
dDocent_Contig_18614	182	0.03702	904	0.9821
dDocent_Contig_4509	211	0.03706	903	0.9821
dDocent_Contig_18827	128	0.03718	900	0.9821
dDocent_Contig_6704	42	0.03722	899	0.9821
dDocent_Contig_18917	220	0.03726	898	0.9821
dDocent_Contig_25619	264	0.03735	896	0.9821
dDocent_Contig_274	260	0.03739	895	0.9821
dDocent_Contig_41256	179	0.03739	895	0.9821
dDocent_Contig_11334	247	0.03747	893	0.9821
dDocent_Contig_29582	130	0.03751	892	0.9821
dDocent_Contig_22253	93	0.0376	890	0.9821
dDocent_Contig_2831	114	0.0376	890	0.9821
dDocent_Contig_54069	133	0.0376	890	0.9821
dDocent_Contig_7638	165	0.03761	903	0.9821
dDocent_Contig_24173	113	0.03764	889	0.9821
dDocent_Contig_30487	258	0.03764	889	0.9821
dDocent_Contig_47070	199	0.03764	889	0.9821
dDocent_Contig_19836	194	0.03768	888	0.9821
dDocent_Contig_2746	114	0.03768	888	0.9821
dDocent_Contig_6315	51	0.03768	888	0.9821
dDocent_Contig_35481	159	0.03773	887	0.9821
dDocent_Contig_13394	114	0.03777	886	0.9821
dDocent_Contig_24901	233	0.03778	899	0.9821
dDocent_Contig_25918	227	0.03781	885	0.9821
dDocent_Contig_27626	190	0.03781	885	0.9821
dDocent_Contig_42801	102	0.03781	885	0.9821
dDocent_Contig_3416	235	0.03786	897	0.9821
dDocent_Contig_13914	57	0.03798	881	0.9821
dDocent_Contig_25875	77	0.03798	881	0.9821
dDocent_Contig_10003	211	0.03802	880	0.9821
dDocent_Contig_12350	266	0.03802	880	0.9821
dDocent_Contig_19480	81	0.03802	880	0.9821
dDocent_Contig_21144	68	0.03802	880	0.9821
dDocent_Contig_21200	181	0.03802	880	0.9821
dDocent_Contig_23167	242	0.03802	880	0.9821
dDocent_Contig_25282	246	0.03802	880	0.9821
dDocent_Contig_26055	189	0.03802	880	0.9821
dDocent_Contig_1833	12	0.03807	879	0.9821
dDocent_Contig_1833	203	0.03807	879	0.9821
dDocent_Contig_1833	204	0.03807	879	0.9821
dDocent_Contig_36203	67	0.03807	879	0.9821
dDocent_Contig_4587	287	0.03807	879	0.9821
dDocent_Contig_48279	265	0.03807	892	0.9821
dDocent_Contig_34586	74	0.03815	877	0.9821
dDocent_Contig_34586	232	0.03815	877	0.9821
dDocent_Contig_914	202	0.03824	875	0.9821
dDocent_Contig_8664	32	0.03829	874	0.9821
dDocent_Contig_11892	80	0.03833	873	0.9821
dDocent_Contig_23857	276	0.03833	873	0.9821
dDocent_Contig_24341	261	0.03833	873	0.9821
dDocent_Contig_24685	90	0.03833	873	0.9821
dDocent_Contig_24685	97	0.03833	873	0.9821
dDocent_Contig_32756	69	0.03833	873	0.9821
dDocent_Contig_1014	211	0.03842	871	0.9821
dDocent_Contig_10443	109	0.03842	871	0.9821
dDocent_Contig_11590	36	0.03842	871	0.9821
dDocent_Contig_1377	260	0.03842	871	0.9821
dDocent_Contig_14185	207	0.03842	871	0.9821
dDocent_Contig_14604	44	0.03842	871	0.9821
dDocent_Contig_16052	23	0.03842	871	0.9821
dDocent_Contig_17652	178	0.03842	871	0.9821
dDocent_Contig_17652	239	0.03842	871	0.9821
dDocent_Contig_19823	41	0.03842	871	0.9821
dDocent_Contig_19823	97	0.03842	871	0.9821
dDocent_Contig_25987	198	0.03842	871	0.9821
dDocent_Contig_25987	228	0.03842	871	0.9821
dDocent_Contig_28397	230	0.03842	871	0.9821
dDocent_Contig_3960	86	0.03842	871	0.9821
dDocent_Contig_4708	194	0.03842	871	0.9821
dDocent_Contig_4903	133	0.03842	871	0.9821
dDocent_Contig_940	234	0.03842	871	0.9821
dDocent_Contig_12007	244	0.03846	883	0.9821
dDocent_Contig_8774	194	0.03846	883	0.9821
dDocent_Contig_1356	255	0.03864	879	0.9821
dDocent_Contig_15107	164	0.03864	866	0.9821
dDocent_Contig_38378	238	0.03864	866	0.9821
dDocent_Contig_632	44	0.03864	879	0.9821
dDocent_Contig_847	226	0.03868	865	0.9821
dDocent_Contig_4084	92	0.03873	864	0.9821
dDocent_Contig_21298	229	0.03877	863	0.9821
dDocent_Contig_23077	61	0.03877	863	0.9821
dDocent_Contig_23077	272	0.03877	863	0.9821
dDocent_Contig_3085	233	0.03891	860	0.9821
dDocent_Contig_23194	9	0.03904	870	0.9821
dDocent_Contig_1789	261	0.03909	856	0.9821
dDocent_Contig_16690	53	0.03917	867	0.9821
dDocent_Contig_18117	212	0.03918	854	0.9821
dDocent_Contig_20776	261	0.03918	854	0.9821
dDocent_Contig_20390	186	0.03923	853	0.9821
dDocent_Contig_20390	255	0.03923	853	0.9821
dDocent_Contig_20715	78	0.03923	853	0.9821
dDocent_Contig_6614	131	0.03923	853	0.9821
dDocent_Contig_9902	241	0.03923	853	0.9821
dDocent_Contig_10646	215	0.03926	865	0.9821
dDocent_Contig_26921	236	0.03926	865	0.9821
dDocent_Contig_12516	86	0.03927	852	0.9821
dDocent_Contig_25447	164	0.0394	862	0.9821
dDocent_Contig_21797	122	0.03941	849	0.9821
dDocent_Contig_23022	245	0.03946	848	0.9821
dDocent_Contig_4818	211	0.03946	848	0.9821
dDocent_Contig_36972	85	0.03953	859	0.9821
dDocent_Contig_20387	63	0.03955	846	0.9821
dDocent_Contig_9377	90	0.03955	846	0.9821
dDocent_Contig_23839	240	0.03958	858	0.9821
dDocent_Contig_29253	152	0.03958	858	0.9821
dDocent_Contig_10720	220	0.0396	845	0.9821
dDocent_Contig_14795	56	0.0396	845	0.9821
dDocent_Contig_33976	220	0.0396	845	0.9821
dDocent_Contig_33976	247	0.0396	845	0.9821
dDocent_Contig_46734	252	0.0396	845	0.9821
dDocent_Contig_7012	176	0.03972	855	0.9821
dDocent_Contig_45428	201	0.03974	842	0.9821
dDocent_Contig_27157	235	0.03988	839	0.9821
dDocent_Contig_16686	227	0.03991	851	0.9821
dDocent_Contig_6269	210	0.03993	838	0.9821
dDocent_Contig_3099	51	0.03998	837	0.9821
dDocent_Contig_48152	156	0.03998	837	0.9821
dDocent_Contig_11513	95	0.04002	836	0.9821
dDocent_Contig_14011	95	0.04009	847	0.9821
dDocent_Contig_2219	171	0.04022	832	0.9821
dDocent_Contig_39522	288	0.04026	831	0.9821
dDocent_Contig_9982	112	0.04028	843	0.9821
dDocent_Contig_4123	26	0.04046	827	0.9821
dDocent_Contig_10464	255	0.04048	839	0.9821
dDocent_Contig_14634	71	0.04072	834	0.9821
dDocent_Contig_19137	125	0.04077	833	0.9821
dDocent_Contig_43941	57	0.04077	833	0.9821
dDocent_Contig_36037	39	0.04085	819	0.9821
dDocent_Contig_36037	62	0.04085	819	0.9821
dDocent_Contig_418	256	0.04085	819	0.9821
dDocent_Contig_39949	158	0.04087	831	0.9821
dDocent_Contig_39949	166	0.04087	831	0.9821
dDocent_Contig_19199	94	0.0409	818	0.9821
dDocent_Contig_3957	165	0.0409	818	0.9821
dDocent_Contig_212	132	0.04091	830	0.9821
dDocent_Contig_10999	40	0.04095	817	0.9821
dDocent_Contig_14673	203	0.04095	817	0.9821
dDocent_Contig_26475	226	0.04095	817	0.9821
dDocent_Contig_35890	203	0.04095	817	0.9821
dDocent_Contig_26951	249	0.04096	829	0.9821
dDocent_Contig_38014	238	0.04105	815	0.9821
dDocent_Contig_13071	216	0.0411	814	0.9821
dDocent_Contig_29819	273	0.0411	814	0.9821
dDocent_Contig_50641	180	0.04146	807	0.9821
dDocent_Contig_14119	82	0.04151	818	0.9821
dDocent_Contig_1686	221	0.04151	806	0.9821
dDocent_Contig_18005	228	0.04151	806	0.9821
dDocent_Contig_19252	9	0.04151	806	0.9821
dDocent_Contig_21999	268	0.04151	806	0.9821
dDocent_Contig_22405	275	0.04151	806	0.9821
dDocent_Contig_30077	47	0.04151	806	0.9821
dDocent_Contig_3616	118	0.04151	806	0.9821
dDocent_Contig_38378	180	0.04151	806	0.9821
dDocent_Contig_46444	208	0.04151	806	0.9821
dDocent_Contig_48227	103	0.04151	806	0.9821
dDocent_Contig_49821	209	0.04151	806	0.9821
dDocent_Contig_6060	205	0.04151	806	0.9821
dDocent_Contig_7572	281	0.04151	806	0.9821
dDocent_Contig_239	136	0.04156	805	0.9821
dDocent_Contig_9651	53	0.04156	805	0.9821
dDocent_Contig_28575	113	0.04161	804	0.9821
dDocent_Contig_29079	106	0.04161	804	0.9821
dDocent_Contig_41935	11	0.04162	816	0.9821
dDocent_Contig_20981	120	0.04167	803	0.9821
dDocent_Contig_9533	125	0.04182	812	0.9821
dDocent_Contig_42738	63	0.04188	799	0.9821
dDocent_Contig_42738	195	0.04188	799	0.9821
dDocent_Contig_55134	44	0.04188	799	0.9821
dDocent_Contig_9581	244	0.04188	799	0.9821
dDocent_Contig_54726	211	0.04198	809	0.9821
dDocent_Contig_17427	135	0.04208	807	0.9821
dDocent_Contig_17950	176	0.04209	795	0.9821
dDocent_Contig_35271	26	0.04209	795	0.9821
dDocent_Contig_34523	119	0.04224	792	0.9821
dDocent_Contig_34523	124	0.04224	792	0.9821
dDocent_Contig_2159	211	0.0423	791	0.9821
dDocent_Contig_5418	16	0.04235	790	0.9821
dDocent_Contig_12533	203	0.04255	798	0.9821
dDocent_Contig_37074	44	0.04261	797	0.9821
dDocent_Contig_37074	66	0.04261	797	0.9821
dDocent_Contig_37074	155	0.04261	797	0.9821
dDocent_Contig_1983	39	0.04262	785	0.9821
dDocent_Contig_2922	188	0.04262	785	0.9821
dDocent_Contig_2922	204	0.04262	785	0.9821
dDocent_Contig_9637	57	0.04262	785	0.9821
dDocent_Contig_9193	12	0.04268	784	0.9821
dDocent_Contig_13641	178	0.04271	795	0.9821
dDocent_Contig_5666	54	0.04271	795	0.9821
dDocent_Contig_19982	195	0.04278	782	0.9821
dDocent_Contig_8030	55	0.043	778	0.9821
dDocent_Contig_38739	238	0.04311	776	0.9821
dDocent_Contig_40653	31	0.0432	786	0.9821
dDocent_Contig_10928	206	0.04328	773	0.9821
dDocent_Contig_11760	191	0.04328	773	0.9821
dDocent_Contig_6498	109	0.04328	773	0.9821
dDocent_Contig_35517	253	0.04331	784	0.9821
dDocent_Contig_2975	236	0.04351	769	0.9821
dDocent_Contig_4413	214	0.04353	780	0.9821
dDocent_Contig_10600	15	0.04356	768	0.9821
dDocent_Contig_30317	174	0.04356	768	0.9821
dDocent_Contig_35543	198	0.04356	768	0.9821
dDocent_Contig_7184	93	0.04356	768	0.9821
dDocent_Contig_7558	228	0.04356	768	0.9821
dDocent_Contig_16553	84	0.04362	767	0.9821
dDocent_Contig_30667	81	0.04368	766	0.9821
dDocent_Contig_38549	269	0.04376	776	0.9821
dDocent_Contig_173	37	0.04381	775	0.9821
dDocent_Contig_38725	191	0.04391	762	0.9821
dDocent_Contig_10315	280	0.04396	761	0.9821
dDocent_Contig_22759	197	0.04396	761	0.9821
dDocent_Contig_13894	49	0.04404	771	0.9821
dDocent_Contig_2435	97	0.04404	771	0.9821
dDocent_Contig_29038	83	0.04404	771	0.9821
dDocent_Contig_22351	78	0.04414	758	0.9821
dDocent_Contig_19734	108	0.04416	769	0.9821
dDocent_Contig_40428	104	0.04416	769	0.9821
dDocent_Contig_6105	195	0.04427	767	0.9821
dDocent_Contig_34654	239	0.04433	766	0.9821
dDocent_Contig_4542	22	0.04433	766	0.9821
dDocent_Contig_6245	186	0.04433	766	0.9821
dDocent_Contig_8571	108	0.04433	766	0.9821
dDocent_Contig_1838	53	0.04443	753	0.9821
dDocent_Contig_17378	89	0.04449	752	0.9821
dDocent_Contig_44475	109	0.04449	752	0.9821
dDocent_Contig_10977	127	0.04455	751	0.9821
dDocent_Contig_8118	289	0.04468	760	0.9821
dDocent_Contig_1040	219	0.04485	746	0.9821
dDocent_Contig_6686	88	0.04485	746	0.9821
dDocent_Contig_33932	154	0.04491	745	0.9821
dDocent_Contig_14567	196	0.04503	743	0.9821
dDocent_Contig_1706	86	0.04503	743	0.9821
dDocent_Contig_30654	35	0.04503	743	0.9821
dDocent_Contig_59548	75	0.04503	754	0.9821
dDocent_Contig_7479	222	0.04503	743	0.9821
dDocent_Contig_17790	115	0.04509	753	0.9821
dDocent_Contig_30538	164	0.04509	753	0.9821
dDocent_Contig_30538	215	0.04509	753	0.9821
dDocent_Contig_4067	109	0.04509	742	0.9821
dDocent_Contig_21072	276	0.04515	741	0.9821
dDocent_Contig_22663	236	0.04515	752	0.9821
dDocent_Contig_26470	65	0.04515	752	0.9821
dDocent_Contig_26470	153	0.04515	752	0.9821
dDocent_Contig_16852	105	0.04521	740	0.9821
dDocent_Contig_32375	136	0.04527	739	0.9821
dDocent_Contig_32375	191	0.04527	739	0.9821
dDocent_Contig_270	19	0.04564	733	0.9821
dDocent_Contig_35550	227	0.04564	744	0.9821
dDocent_Contig_14082	124	0.0457	743	0.9821
dDocent_Contig_14082	130	0.0457	743	0.9821
dDocent_Contig_41716	79	0.0457	732	0.9821
dDocent_Contig_11284	152	0.04577	731	0.9821
dDocent_Contig_2519	180	0.04577	731	0.9821
dDocent_Contig_5650	220	0.04588	740	0.9821
dDocent_Contig_20215	54	0.04589	729	0.9821
dDocent_Contig_24810	38	0.04607	737	0.9821
dDocent_Contig_15359	212	0.04613	736	0.9821
dDocent_Contig_9403	127	0.04627	723	0.9821
dDocent_Contig_29067	112	0.04633	722	0.9821
dDocent_Contig_19165	269	0.0464	721	0.9821
dDocent_Contig_10483	67	0.04645	731	0.9821
dDocent_Contig_20592	38	0.04645	731	0.9821
dDocent_Contig_20592	75	0.04645	731	0.9821
dDocent_Contig_15126	69	0.04646	720	0.9821
dDocent_Contig_25340	222	0.04646	720	0.9821
dDocent_Contig_8959	21	0.04646	720	0.9821
dDocent_Contig_1467	189	0.04651	730	0.9821
dDocent_Contig_27017	277	0.04651	730	0.9821
dDocent_Contig_23222	112	0.04653	719	0.9821
dDocent_Contig_25869	92	0.04653	719	0.9821
dDocent_Contig_27983	261	0.04658	729	0.9821
dDocent_Contig_1674	297	0.04664	728	0.9821
dDocent_Contig_2519	48	0.04685	714	0.9821
dDocent_Contig_32780	27	0.04685	714	0.9821
dDocent_Contig_12310	116	0.0469	724	0.9821
dDocent_Contig_36648	74	0.04692	713	0.9821
dDocent_Contig_13170	280	0.04696	723	0.9821
dDocent_Contig_572	60	0.04718	709	0.9821
dDocent_Contig_25495	45	0.04725	708	0.9821
dDocent_Contig_3267	113	0.04725	708	0.9821
dDocent_Contig_8790	16	0.04725	708	0.9821
dDocent_Contig_17234	281	0.04729	718	0.9821
dDocent_Contig_14673	255	0.04735	717	0.9821
dDocent_Contig_16800	249	0.04738	706	0.9821
dDocent_Contig_20376	122	0.04738	706	0.9821
dDocent_Contig_35765	31	0.04738	706	0.9821
dDocent_Contig_14877	126	0.04742	716	0.9821
dDocent_Contig_47089	184	0.04745	705	0.9821
dDocent_Contig_21510	61	0.04749	715	0.9821
dDocent_Contig_6133	280	0.04752	704	0.9821
dDocent_Contig_12718	260	0.04762	713	0.9821
dDocent_Contig_4202	185	0.04772	701	0.9821
dDocent_Contig_9953	88	0.04772	701	0.9821
dDocent_Contig_31818	123	0.04782	710	0.9821
dDocent_Contig_20789	249	0.04789	709	0.9821
dDocent_Contig_3304	50	0.04789	709	0.9821
dDocent_Contig_40161	111	0.04793	698	0.9821
dDocent_Contig_39855	203	0.04795	708	0.9821
dDocent_Contig_20262	16	0.04806	696	0.9821
dDocent_Contig_20483	192	0.0482	694	0.9821
dDocent_Contig_2155	108	0.0482	694	0.9821
dDocent_Contig_23862	92	0.04827	693	0.9821
dDocent_Contig_32272	58	0.04841	691	0.9821
dDocent_Contig_13798	208	0.04843	701	0.9821
dDocent_Contig_56266	229	0.04848	690	0.9821
dDocent_Contig_5369	54	0.04855	689	0.9821
dDocent_Contig_4636	230	0.04857	699	0.9821
dDocent_Contig_18917	61	0.04862	688	0.9821
dDocent_Contig_4943	174	0.04885	695	0.9821
dDocent_Contig_15410	230	0.04891	684	0.9821
dDocent_Contig_21257	116	0.04899	693	0.9821
dDocent_Contig_5195	59	0.04912	681	0.9821
dDocent_Contig_1551	154	0.04919	680	0.9821
dDocent_Contig_19072	15	0.04941	677	0.9821
dDocent_Contig_19072	68	0.04941	677	0.9821
dDocent_Contig_19072	87	0.04941	677	0.9821
dDocent_Contig_19072	112	0.04941	677	0.9821
dDocent_Contig_19072	119	0.04941	677	0.9821
dDocent_Contig_19072	126	0.04941	677	0.9821
dDocent_Contig_861	202	0.04941	677	0.9821
dDocent_Contig_17739	278	0.04942	687	0.9821
dDocent_Contig_35646	191	0.04956	675	0.9821
dDocent_Contig_28639	263	0.04963	674	0.9821
dDocent_Contig_1571	33	0.0497	673	0.9821
dDocent_Contig_56997	282	0.0497	673	0.9821
dDocent_Contig_10294	99	0.04978	682	0.9821
dDocent_Contig_3640	267	0.04978	672	0.9821
dDocent_Contig_44011	221	0.04978	682	0.9821
dDocent_Contig_6495	155	0.04978	672	0.9821
dDocent_Contig_9168	240	0.04978	672	0.9821
dDocent_Contig_30007	208	0.04985	671	0.9821
dDocent_Contig_11263	268	0.05	669	0.9821
dDocent_Contig_30680	262	0.05	669	0.9821
dDocent_Contig_6817	12	0.05	679	0.9821
dDocent_Contig_15934	204	0.05007	668	0.9821
dDocent_Contig_18669	244	0.05007	678	0.9821
dDocent_Contig_55100	38	0.05007	668	0.9821
dDocent_Contig_46766	237	0.05015	677	0.9821
dDocent_Contig_7723	228	0.05015	677	0.9821
dDocent_Contig_31117	58	0.05022	666	0.9821
dDocent_Contig_35038	270	0.05022	666	0.9821
dDocent_Contig_19163	13	0.05045	663	0.9821
dDocent_Contig_17350	73	0.0506	661	0.9821
dDocent_Contig_13737	243	0.05099	656	0.9821
dDocent_Contig_34862	216	0.05099	656	0.9821
dDocent_Contig_8411	49	0.05099	656	0.9821
dDocent_Contig_27113	119	0.051	646	0.9821
dDocent_Contig_20934	42	0.05108	645	0.9821
dDocent_Contig_11206	108	0.05115	654	0.9821
dDocent_Contig_10455	241	0.05124	643	0.9821
dDocent_Contig_1883	82	0.05146	650	0.9821
dDocent_Contig_24832	229	0.05148	640	0.9821
dDocent_Contig_26768	39	0.05154	649	0.9821
dDocent_Contig_13872	285	0.05156	639	0.9821
dDocent_Contig_12475	79	0.05162	648	0.9821
dDocent_Contig_22256	131	0.05162	648	0.9821
dDocent_Contig_5480	152	0.05164	638	0.9821
dDocent_Contig_2059	140	0.05167	657	0.9821
dDocent_Contig_40538	170	0.0517	647	0.9821
dDocent_Contig_40538	230	0.0517	647	0.9821
dDocent_Contig_12767	253	0.05181	636	0.9821
dDocent_Contig_2473	115	0.05181	636	0.9821
dDocent_Contig_34355	72	0.05189	635	0.9821
dDocent_Contig_4626	153	0.05213	632	0.9821
dDocent_Contig_6331	241	0.05213	632	0.9821
dDocent_Contig_32334	12	0.05218	641	0.9821
dDocent_Contig_15274	228	0.05222	631	0.9821
dDocent_Contig_28307	198	0.05226	640	0.9821
dDocent_Contig_12372	180	0.0523	630	0.9821
dDocent_Contig_4371	152	0.0523	630	0.9821
dDocent_Contig_21265	224	0.05234	639	0.9821
dDocent_Contig_25962	73	0.05234	639	0.9821
dDocent_Contig_21993	219	0.05238	629	0.9821
dDocent_Contig_1036	167	0.05243	638	0.9821
dDocent_Contig_11337	203	0.05243	638	0.9821
dDocent_Contig_725	135	0.05243	638	0.9821
dDocent_Contig_21661	124	0.05305	621	0.9821
dDocent_Contig_27392	60	0.05305	621	0.9821
dDocent_Contig_13224	171	0.05317	629	0.9821
dDocent_Contig_17881	221	0.05326	628	0.9821
dDocent_Contig_19421	261	0.05331	618	0.9821
dDocent_Contig_22247	81	0.0534	617	0.9821
dDocent_Contig_24886	16	0.05348	616	0.9821
dDocent_Contig_34054	56	0.05383	612	0.9821
dDocent_Contig_5292	261	0.05383	612	0.9821
dDocent_Contig_8347	233	0.05395	620	0.9821
dDocent_Contig_45961	161	0.05401	610	0.9821
dDocent_Contig_18591	273	0.05403	619	0.9821
dDocent_Contig_15343	329	0.05419	608	0.9821
dDocent_Contig_10271	77	0.05428	607	0.9821
dDocent_Contig_1317	153	0.05437	606	0.9821
dDocent_Contig_26013	48	0.05437	606	0.9821
dDocent_Contig_26013	270	0.05437	606	0.9821
dDocent_Contig_5065	261	0.05437	606	0.9821
dDocent_Contig_14850	78	0.05446	605	0.9821
dDocent_Contig_18172	125	0.05455	604	0.9821
dDocent_Contig_3886	86	0.05455	604	0.9821
dDocent_Contig_10515	90	0.05464	603	0.9821
dDocent_Contig_14153	37	0.05465	612	0.9821
dDocent_Contig_14050	261	0.05473	602	0.9821
dDocent_Contig_32405	253	0.05473	602	0.9821
dDocent_Contig_152	232	0.05474	611	0.9821
dDocent_Contig_2709	140	0.05482	601	0.9821
dDocent_Contig_30384	123	0.05482	601	0.9821
dDocent_Contig_25551	26	0.05491	600	0.9821
dDocent_Contig_129	160	0.05518	597	0.9821
dDocent_Contig_22912	134	0.05518	597	0.9821
dDocent_Contig_27936	183	0.05518	597	0.9821
dDocent_Contig_8409	82	0.05518	597	0.9821
dDocent_Contig_15527	202	0.05519	606	0.9821
dDocent_Contig_30248	68	0.05519	606	0.9821
dDocent_Contig_38573	154	0.05528	605	0.9821
dDocent_Contig_41165	274	0.05528	605	0.9821
dDocent_Contig_12520	180	0.05546	594	0.9821
dDocent_Contig_27170	70	0.05546	594	0.9821
dDocent_Contig_6726	153	0.05546	594	0.9821
dDocent_Contig_9852	13	0.05546	594	0.9821
dDocent_Contig_19658	255	0.05556	593	0.9821
dDocent_Contig_22023	272	0.05556	593	0.9821
dDocent_Contig_8254	261	0.05556	593	0.9821
dDocent_Contig_24325	25	0.05565	601	0.9821
dDocent_Contig_13549	226	0.05574	591	0.9821
dDocent_Contig_51550	10	0.05574	591	0.9821
dDocent_Contig_23290	56	0.05583	599	0.9821
dDocent_Contig_6341	66	0.05584	590	0.9821
dDocent_Contig_20639	8	0.05593	589	0.9821
dDocent_Contig_20814	94	0.05593	598	0.9821
dDocent_Contig_20814	99	0.05593	598	0.9821
dDocent_Contig_20814	107	0.05593	598	0.9821
dDocent_Contig_21404	233	0.05603	588	0.9821
dDocent_Contig_2967	40	0.05622	586	0.9821
dDocent_Contig_37585	193	0.05622	586	0.9821
dDocent_Contig_13344	237	0.05631	585	0.9821
dDocent_Contig_36890	279	0.0564	593	0.9821
dDocent_Contig_23982	101	0.05651	583	0.9821
dDocent_Contig_38346	137	0.05651	583	0.9821
dDocent_Contig_29190	62	0.0566	582	0.9821
dDocent_Contig_30843	163	0.0566	582	0.9821
dDocent_Contig_17662	219	0.0567	581	0.9821
dDocent_Contig_1874	105	0.0568	580	0.9821
dDocent_Contig_4438	196	0.0568	580	0.9821
dDocent_Contig_17308	130	0.05688	588	0.9821
dDocent_Contig_40312	173	0.05707	586	0.9821
dDocent_Contig_2155	53	0.05709	577	0.9821
dDocent_Contig_1120	229	0.05726	584	0.9821
dDocent_Contig_1120	239	0.05726	584	0.9821
dDocent_Contig_30194	258	0.05729	575	0.9821
dDocent_Contig_15164	178	0.05739	574	0.9821
dDocent_Contig_22738	235	0.05749	573	0.9821
dDocent_Contig_35962	252	0.05749	573	0.9821
dDocent_Contig_46433	60	0.05749	573	0.9821
dDocent_Contig_47047	127	0.05749	573	0.9821
dDocent_Contig_18250	167	0.05756	581	0.9821
dDocent_Contig_20117	193	0.05756	581	0.9821
dDocent_Contig_10600	86	0.05759	572	0.9821
dDocent_Contig_10600	94	0.05759	572	0.9821
dDocent_Contig_11262	207	0.05766	580	0.9821
dDocent_Contig_28701	283	0.05766	580	0.9821
dDocent_Contig_1286	188	0.05769	571	0.9821
dDocent_Contig_30166	201	0.05769	571	0.9821
dDocent_Contig_23588	192	0.05776	579	0.9821
dDocent_Contig_10655	184	0.05779	570	0.9821
dDocent_Contig_8185	126	0.05779	570	0.9821
dDocent_Contig_43446	183	0.05786	578	0.9821
dDocent_Contig_1332	262	0.05789	569	0.9821
dDocent_Contig_44533	118	0.05789	569	0.9821
dDocent_Contig_26143	62	0.058	568	0.9821
dDocent_Contig_47430	160	0.058	568	0.9821
dDocent_Contig_35552	112	0.05806	576	0.9821
dDocent_Contig_7556	195	0.05806	576	0.9821
dDocent_Contig_4200	168	0.0581	567	0.9821
dDocent_Contig_45137	154	0.0581	567	0.9821
dDocent_Contig_37176	193	0.05816	575	0.9821
dDocent_Contig_9597	248	0.05816	575	0.9821
dDocent_Contig_49553	39	0.0582	566	0.9821
dDocent_Contig_9995	276	0.0582	566	0.9821
dDocent_Contig_21395	71	0.05826	574	0.9821
dDocent_Contig_11237	262	0.0583	565	0.9821
dDocent_Contig_14409	262	0.0583	565	0.9821
dDocent_Contig_25597	85	0.05836	573	0.9821
dDocent_Contig_11050	197	0.05841	564	0.9821
dDocent_Contig_14575	176	0.05841	564	0.9821
dDocent_Contig_24376	276	0.05846	572	0.9821
dDocent_Contig_1391	230	0.05851	563	0.9821
dDocent_Contig_16253	79	0.05851	563	0.9821
dDocent_Contig_16253	94	0.05851	563	0.9821
dDocent_Contig_3956	196	0.05851	563	0.9821
dDocent_Contig_47683	272	0.05857	571	0.9821
dDocent_Contig_48634	274	0.05861	562	0.9821
dDocent_Contig_24090	100	0.05872	561	0.9821
dDocent_Contig_38305	45	0.05872	561	0.9821
dDocent_Contig_4911	237	0.05872	561	0.9821
dDocent_Contig_18847	97	0.05893	559	0.9821
dDocent_Contig_13333	154	0.05898	567	0.9821
dDocent_Contig_2542	105	0.05898	567	0.9821
dDocent_Contig_6896	77	0.05903	558	0.9821
dDocent_Contig_14974	93	0.05914	557	0.9821
dDocent_Contig_8221	188	0.05914	557	0.9821
dDocent_Contig_29758	108	0.05919	565	0.9821
dDocent_Contig_31688	67	0.05925	556	0.9821
dDocent_Contig_16160	66	0.05929	564	0.9821
dDocent_Contig_7929	115	0.05929	564	0.9821
dDocent_Contig_23583	165	0.05935	555	0.9821
dDocent_Contig_49894	31	0.05935	555	0.9821
dDocent_Contig_5605	110	0.0594	563	0.9821
dDocent_Contig_15529	276	0.05946	554	0.9821
dDocent_Contig_25295	270	0.05946	554	0.9821
dDocent_Contig_9656	242	0.05946	554	0.9821
dDocent_Contig_4218	291	0.0595	562	0.9821
dDocent_Contig_43038	200	0.05957	553	0.9821
dDocent_Contig_5302	188	0.05957	553	0.9821
dDocent_Contig_14527	281	0.05961	561	0.9821
dDocent_Contig_14527	287	0.05961	561	0.9821
dDocent_Contig_246	152	0.05967	552	0.9821
dDocent_Contig_6317	37	0.05967	552	0.9821
dDocent_Contig_22932	19	0.05971	560	0.9821
dDocent_Contig_12237	135	0.05978	551	0.9821
dDocent_Contig_15468	126	0.05978	551	0.9821
dDocent_Contig_27222	19	0.05978	551	0.9821
dDocent_Contig_21055	153	0.05982	559	0.9821
dDocent_Contig_14115	119	0.05989	550	0.9821
dDocent_Contig_36587	112	0.05989	550	0.9821
dDocent_Contig_36987	247	0.05989	550	0.9821
dDocent_Contig_27890	179	0.05993	558	0.9821
dDocent_Contig_6404	175	0.05993	558	0.9821
dDocent_Contig_10903	136	0.06	549	0.9821
dDocent_Contig_18803	273	0.06	549	0.9821
dDocent_Contig_21413	30	0.06	549	0.9821
dDocent_Contig_29152	153	0.06	549	0.9821
dDocent_Contig_40570	24	0.06	549	0.9821
dDocent_Contig_4565	54	0.06	549	0.9821
dDocent_Contig_21733	267	0.06011	548	0.9821
dDocent_Contig_3639	185	0.06033	546	0.9821
dDocent_Contig_28534	187	0.06036	554	0.9821
dDocent_Contig_50063	208	0.06055	544	0.9821
dDocent_Contig_8148	18	0.06055	544	0.9821
dDocent_Contig_19504	191	0.06058	552	0.9821
dDocent_Contig_40608	82	0.06066	543	0.9821
dDocent_Contig_5836	221	0.06066	543	0.9821
dDocent_Contig_32998	230	0.06069	551	0.9821
dDocent_Contig_7134	280	0.06091	549	0.9821
dDocent_Contig_1180	272	0.061	540	0.9821
dDocent_Contig_12308	97	0.061	540	0.9821
dDocent_Contig_14819	94	0.061	540	0.9821
dDocent_Contig_17156	226	0.061	540	0.9821
dDocent_Contig_13693	120	0.06111	539	0.9821
dDocent_Contig_44385	40	0.06111	539	0.9821
dDocent_Contig_7750	269	0.06111	539	0.9821
dDocent_Contig_46766	94	0.06122	538	0.9821
dDocent_Contig_31746	256	0.06124	546	0.9821
dDocent_Contig_35708	209	0.06134	537	0.9821
dDocent_Contig_29561	201	0.06136	545	0.9821
dDocent_Contig_23194	233	0.06145	536	0.9821
dDocent_Contig_23194	269	0.06145	536	0.9821
dDocent_Contig_24426	198	0.06157	535	0.9821
dDocent_Contig_4885	90	0.06157	535	0.9821
dDocent_Contig_15628	111	0.06158	543	0.9821
dDocent_Contig_16843	163	0.06169	542	0.9821
dDocent_Contig_3639	191	0.06169	542	0.9821
dDocent_Contig_15902	11	0.0618	533	0.9821
dDocent_Contig_26385	96	0.0618	533	0.9821
dDocent_Contig_27762	131	0.0618	533	0.9821
dDocent_Contig_39806	123	0.0618	533	0.9821
dDocent_Contig_40003	257	0.0618	533	0.9821
dDocent_Contig_1199	158	0.06181	541	0.9821
dDocent_Contig_17790	182	0.06192	540	0.9821
dDocent_Contig_18313	264	0.06192	540	0.9821
dDocent_Contig_2951	58	0.06204	539	0.9821
dDocent_Contig_40945	94	0.06204	539	0.9821
dDocent_Contig_11184	61	0.06215	530	0.9821
dDocent_Contig_14758	262	0.06215	530	0.9821
dDocent_Contig_40506	124	0.06215	530	0.9821
dDocent_Contig_9476	9	0.06215	530	0.9821
dDocent_Contig_5791	172	0.06226	529	0.9821
dDocent_Contig_58455	35	0.06226	529	0.9821
dDocent_Contig_19875	74	0.06227	537	0.9821
dDocent_Contig_43486	265	0.06227	537	0.9821
dDocent_Contig_7958	182	0.06227	537	0.9821
dDocent_Contig_20776	195	0.06238	536	0.9821
dDocent_Contig_27376	272	0.06238	528	0.9821
dDocent_Contig_8411	71	0.06238	536	0.9821
dDocent_Contig_51497	116	0.06262	534	0.9821
dDocent_Contig_56735	82	0.06262	526	0.9821
dDocent_Contig_8550	165	0.06262	534	0.9821
dDocent_Contig_17603	93	0.06273	533	0.9821
dDocent_Contig_25570	110	0.06273	533	0.9821
dDocent_Contig_20799	27	0.06286	524	0.9821
dDocent_Contig_14772	23	0.06297	531	0.9821
dDocent_Contig_14772	43	0.06297	531	0.9821
dDocent_Contig_14772	79	0.06297	531	0.9821
dDocent_Contig_14772	105	0.06297	531	0.9821
dDocent_Contig_240	190	0.06309	530	0.9821
dDocent_Contig_43978	264	0.06309	530	0.9821
dDocent_Contig_7082	303	0.06309	530	0.9821
dDocent_Contig_12425	185	0.06321	529	0.9821
dDocent_Contig_19180	56	0.06333	528	0.9821
dDocent_Contig_10746	116	0.06334	520	0.9821
dDocent_Contig_10746	239	0.06334	520	0.9821
dDocent_Contig_14975	120	0.06334	520	0.9821
dDocent_Contig_34364	34	0.06334	520	0.9821
dDocent_Contig_41128	159	0.06334	520	0.9821
dDocent_Contig_10072	20	0.06346	519	0.9821
dDocent_Contig_17827	198	0.06346	519	0.9821
dDocent_Contig_47212	88	0.06346	519	0.9821
dDocent_Contig_17917	152	0.06358	518	0.9821
dDocent_Contig_52461	158	0.06358	518	0.9821
dDocent_Contig_16822	184	0.06371	517	0.9821
dDocent_Contig_3779	123	0.06371	517	0.9821
dDocent_Contig_47332	174	0.06371	517	0.9821
dDocent_Contig_981	221	0.06371	517	0.9821
dDocent_Contig_12242	190	0.06383	516	0.9821
dDocent_Contig_3639	266	0.06383	516	0.9821
dDocent_Contig_3639	282	0.06383	516	0.9821
dDocent_Contig_7986	12	0.06383	516	0.9821
dDocent_Contig_6868	188	0.06393	523	0.9821
dDocent_Contig_10639	244	0.06395	515	0.9821
dDocent_Contig_20814	190	0.06395	515	0.9821
dDocent_Contig_51926	63	0.06395	515	0.9821
dDocent_Contig_15359	136	0.06408	514	0.9821
dDocent_Contig_18383	75	0.06408	514	0.9821
dDocent_Contig_35661	75	0.0643	520	0.9821
dDocent_Contig_13216	192	0.06433	512	0.9821
dDocent_Contig_48377	197	0.06433	512	0.9821
dDocent_Contig_22058	181	0.06455	518	0.9821
dDocent_Contig_27890	124	0.06455	518	0.9821
dDocent_Contig_10212	86	0.06458	510	0.9821
dDocent_Contig_16046	140	0.06458	510	0.9821
dDocent_Contig_30060	220	0.06471	509	0.9821
dDocent_Contig_8120	285	0.06471	509	0.9821
dDocent_Contig_4797	54	0.06483	508	0.9821
dDocent_Contig_12197	153	0.06496	507	0.9821
dDocent_Contig_25024	67	0.06496	507	0.9821
dDocent_Contig_30249	290	0.06505	514	0.9821
dDocent_Contig_12915	287	0.06509	506	0.9821
dDocent_Contig_11416	38	0.06518	513	0.9821
dDocent_Contig_39746	7	0.06518	513	0.9821
dDocent_Contig_7530	39	0.06522	505	0.9821
dDocent_Contig_28921	34	0.06535	504	0.9821
dDocent_Contig_8896	24	0.06535	504	0.9821
dDocent_Contig_24143	198	0.06543	511	0.9821
dDocent_Contig_24988	230	0.06543	511	0.9821
dDocent_Contig_26679	287	0.06543	511	0.9821
dDocent_Contig_17665	217	0.06556	510	0.9821
dDocent_Contig_24584	116	0.06556	510	0.9821
dDocent_Contig_10005	59	0.06561	502	0.9821
dDocent_Contig_15388	135	0.06561	502	0.9821
dDocent_Contig_3913	270	0.06561	502	0.9821
dDocent_Contig_11087	209	0.06574	501	0.9821
dDocent_Contig_22683	20	0.06574	501	0.9821
dDocent_Contig_35782	246	0.06574	501	0.9821
dDocent_Contig_33425	249	0.06582	508	0.9821
dDocent_Contig_8577	285	0.06592	492	0.9821
dDocent_Contig_54628	262	0.06594	507	0.9821
dDocent_Contig_21819	53	0.06606	491	0.9821
dDocent_Contig_6263	64	0.06606	491	0.9821
dDocent_Contig_4016	54	0.06613	498	0.9821
dDocent_Contig_44397	121	0.06613	498	0.9821
dDocent_Contig_47681	112	0.06613	498	0.9821
dDocent_Contig_28451	176	0.06633	489	0.9821
dDocent_Contig_492	103	0.06633	489	0.9821
dDocent_Contig_3998	38	0.06634	504	0.9821
dDocent_Contig_24069	188	0.0664	496	0.9821
dDocent_Contig_11065	299	0.06646	488	0.9821
dDocent_Contig_47290	122	0.06646	488	0.9821
dDocent_Contig_26288	98	0.06647	503	0.9821
dDocent_Contig_28974	179	0.0666	487	0.9821
dDocent_Contig_32948	187	0.0666	487	0.9821
dDocent_Contig_32948	261	0.0666	487	0.9821
dDocent_Contig_15685	92	0.06667	494	0.9821
dDocent_Contig_36915	253	0.06667	494	0.9821
dDocent_Contig_15091	140	0.06674	486	0.9821
dDocent_Contig_51791	86	0.06674	486	0.9821
dDocent_Contig_14125	125	0.06687	485	0.9821
dDocent_Contig_22540	278	0.06687	500	0.9821
dDocent_Contig_30104	209	0.06694	492	0.9821
dDocent_Contig_48319	141	0.06694	492	0.9821
dDocent_Contig_16927	23	0.06701	484	0.9821
dDocent_Contig_21983	158	0.06701	484	0.9821
dDocent_Contig_8224	233	0.06701	484	0.9821
dDocent_Contig_32503	54	0.06707	491	0.9821
dDocent_Contig_12330	92	0.06715	483	0.9821
dDocent_Contig_6969	276	0.06715	483	0.9821
dDocent_Contig_12047	116	0.06721	490	0.9821
dDocent_Contig_21456	236	0.06721	490	0.9821
dDocent_Contig_25995	187	0.06721	490	0.9821
dDocent_Contig_15949	33	0.06729	482	0.9821
dDocent_Contig_1032	40	0.06735	489	0.9821
dDocent_Contig_17662	233	0.06743	481	0.9821
dDocent_Contig_24886	60	0.06743	481	0.9821
dDocent_Contig_6941	264	0.06743	481	0.9821
dDocent_Contig_6941	281	0.06743	481	0.9821
dDocent_Contig_7958	122	0.06743	481	0.9821
dDocent_Contig_2741	81	0.06757	480	0.9821
dDocent_Contig_26787	45	0.06762	487	0.9821
dDocent_Contig_36669	204	0.06762	487	0.9821
dDocent_Contig_11531	25	0.06771	479	0.9821
dDocent_Contig_13851	62	0.06771	479	0.9821
dDocent_Contig_14292	169	0.06771	479	0.9821
dDocent_Contig_22274	118	0.06771	479	0.9821
dDocent_Contig_2299	197	0.06771	479	0.9821
dDocent_Contig_23730	155	0.06771	479	0.9821
dDocent_Contig_27334	180	0.06771	479	0.9821
dDocent_Contig_28210	43	0.06771	479	0.9821
dDocent_Contig_7051	95	0.06771	479	0.9821
dDocent_Contig_8504	43	0.06771	479	0.9821
dDocent_Contig_9413	267	0.06776	486	0.9821
dDocent_Contig_14166	50	0.06785	478	0.9821
dDocent_Contig_30533	287	0.06785	478	0.9821
dDocent_Contig_46362	80	0.06785	478	0.9821
dDocent_Contig_46362	184	0.06785	478	0.9821
dDocent_Contig_46362	229	0.06785	478	0.9821
dDocent_Contig_46362	273	0.06785	478	0.9821
dDocent_Contig_984	259	0.06785	478	0.9821
dDocent_Contig_25613	69	0.06799	477	0.9821
dDocent_Contig_36378	34	0.06799	477	0.9821
dDocent_Contig_39265	175	0.06799	477	0.9821
dDocent_Contig_49442	79	0.06799	477	0.9821
dDocent_Contig_7450	48	0.06799	477	0.9821
dDocent_Contig_17537	193	0.06804	484	0.9821
dDocent_Contig_1781	177	0.06804	484	0.9821
dDocent_Contig_44597	129	0.06804	484	0.9821
dDocent_Contig_4891	191	0.06804	484	0.9821
dDocent_Contig_975	227	0.06804	484	0.9821
dDocent_Contig_28514	255	0.06813	476	0.9821
dDocent_Contig_4117	64	0.06813	476	0.9821
dDocent_Contig_4140	87	0.06813	476	0.9821
dDocent_Contig_15014	180	0.06828	475	0.9821
dDocent_Contig_4286	8	0.06828	475	0.9821
dDocent_Contig_604	137	0.06828	475	0.9821
dDocent_Contig_10651	161	0.06842	474	0.9821
dDocent_Contig_17072	207	0.06842	474	0.9821
dDocent_Contig_4082	221	0.06842	474	0.9821
dDocent_Contig_36655	28	0.06857	473	0.9821
dDocent_Contig_39879	279	0.06857	473	0.9821
dDocent_Contig_30683	202	0.06871	472	0.9821
dDocent_Contig_147	6	0.06886	471	0.9821
dDocent_Contig_2129	219	0.06886	471	0.9821
dDocent_Contig_21899	126	0.06886	471	0.9821
dDocent_Contig_25963	138	0.06886	471	0.9821
dDocent_Contig_33527	169	0.06886	471	0.9821
dDocent_Contig_34834	53	0.06889	478	0.9821
dDocent_Contig_2734	274	0.069	470	0.9821
dDocent_Contig_43083	99	0.069	470	0.9821
dDocent_Contig_11696	36	0.06904	477	0.9821
dDocent_Contig_32552	162	0.06904	477	0.9821
dDocent_Contig_14598	265	0.06915	469	0.9821
dDocent_Contig_1566	66	0.06915	469	0.9821
dDocent_Contig_31909	188	0.06918	476	0.9821
dDocent_Contig_5511	87	0.06959	466	0.9821
dDocent_Contig_6876	197	0.06959	466	0.9821
dDocent_Contig_6876	216	0.06959	466	0.9821
dDocent_Contig_6876	250	0.06959	466	0.9821
dDocent_Contig_20417	171	0.06974	465	0.9821
dDocent_Contig_39080	59	0.06974	465	0.9821
dDocent_Contig_11579	219	0.06977	472	0.9821
dDocent_Contig_45802	163	0.06977	472	0.9821
dDocent_Contig_10569	102	0.06989	464	0.9821
dDocent_Contig_33715	115	0.06989	464	0.9821
dDocent_Contig_15126	63	0.06992	471	0.9821
dDocent_Contig_445	245	0.06992	471	0.9821
dDocent_Contig_45234	33	0.06992	471	0.9821
dDocent_Contig_17994	14	0.07004	463	0.9821
dDocent_Contig_22048	268	0.07004	463	0.9821
dDocent_Contig_35697	225	0.07006	470	0.9821
dDocent_Contig_37333	81	0.07006	470	0.9821
dDocent_Contig_4142	18	0.07006	470	0.9821
dDocent_Contig_178	87	0.07019	462	0.9821
dDocent_Contig_31656	238	0.07019	462	0.9821
dDocent_Contig_37906	168	0.07019	462	0.9821
dDocent_Contig_632	63	0.07021	469	0.9821
dDocent_Contig_4715	240	0.07035	461	0.9821
dDocent_Contig_5025	239	0.07035	461	0.9821
dDocent_Contig_14624	214	0.07036	468	0.9821
dDocent_Contig_15197	221	0.07036	468	0.9821
dDocent_Contig_2186	185	0.07036	468	0.9821
dDocent_Contig_16825	76	0.0705	460	0.9821
dDocent_Contig_46563	165	0.07051	467	0.9821
dDocent_Contig_27018	153	0.07065	459	0.9821
dDocent_Contig_25038	208	0.07081	458	0.9821
dDocent_Contig_3566	287	0.07081	458	0.9821
dDocent_Contig_37278	254	0.07081	458	0.9821
dDocent_Contig_14536	99	0.07082	465	0.9821
dDocent_Contig_23556	135	0.07096	457	0.9821
dDocent_Contig_31816	47	0.07096	457	0.9821
dDocent_Contig_37923	205	0.07096	457	0.9821
dDocent_Contig_7070	123	0.07096	457	0.9821
dDocent_Contig_13779	67	0.07127	455	0.9821
dDocent_Contig_17570	57	0.07127	455	0.9821
dDocent_Contig_22906	20	0.07127	455	0.9821
dDocent_Contig_2308	84	0.07127	455	0.9821
dDocent_Contig_30371	161	0.07127	455	0.9821
dDocent_Contig_31507	12	0.07127	455	0.9821
dDocent_Contig_42114	194	0.07127	455	0.9821
dDocent_Contig_49435	138	0.07127	462	0.9821
dDocent_Contig_5195	58	0.07127	455	0.9821
dDocent_Contig_11056	252	0.07143	454	0.9821
dDocent_Contig_1193	82	0.07143	454	0.9821
dDocent_Contig_12989	92	0.07143	454	0.9821
dDocent_Contig_22775	16	0.07143	454	0.9821
dDocent_Contig_22775	227	0.07143	454	0.9821
dDocent_Contig_23179	11	0.07143	461	0.9821
dDocent_Contig_23331	51	0.07143	461	0.9821
dDocent_Contig_8755	128	0.07143	454	0.9821
dDocent_Contig_12403	100	0.07159	453	0.9821
dDocent_Contig_2390	213	0.07174	459	0.9821
dDocent_Contig_27646	24	0.07174	452	0.9821
dDocent_Contig_8616	230	0.07174	452	0.9821
dDocent_Contig_12498	24	0.0719	451	0.9821
dDocent_Contig_13220	171	0.0719	451	0.9821
dDocent_Contig_13220	179	0.0719	451	0.9821
dDocent_Contig_15406	231	0.0719	451	0.9821
dDocent_Contig_4272	80	0.0719	451	0.9821
dDocent_Contig_6796	117	0.0719	458	0.9821
dDocent_Contig_7701	91	0.0719	451	0.9821
dDocent_Contig_22858	257	0.07206	450	0.9821
dDocent_Contig_41404	180	0.07206	450	0.9821
dDocent_Contig_7599	71	0.07206	450	0.9821
dDocent_Contig_35641	11	0.07222	449	0.9821
dDocent_Contig_44047	213	0.07222	449	0.9821
dDocent_Contig_44047	218	0.07222	449	0.9821
dDocent_Contig_44047	255	0.07222	449	0.9821
dDocent_Contig_30453	242	0.07237	455	0.9821
dDocent_Contig_33261	156	0.07238	448	0.9821
dDocent_Contig_23610	58	0.07253	454	0.9821
dDocent_Contig_40248	245	0.07253	454	0.9821
dDocent_Contig_50465	211	0.07254	447	0.9821
dDocent_Contig_673	47	0.07269	453	0.9821
dDocent_Contig_18716	204	0.07271	446	0.9821
dDocent_Contig_19275	233	0.07271	446	0.9821
dDocent_Contig_21004	219	0.07271	446	0.9821
dDocent_Contig_3480	237	0.07271	446	0.9821
dDocent_Contig_41770	102	0.07271	446	0.9821
dDocent_Contig_21453	183	0.07287	445	0.9821
dDocent_Contig_39836	278	0.07287	445	0.9821
dDocent_Contig_9021	135	0.07287	445	0.9821
dDocent_Contig_1231	98	0.07301	451	0.9821
dDocent_Contig_28639	249	0.07317	450	0.9821
dDocent_Contig_21941	45	0.0732	443	0.9821
dDocent_Contig_33721	155	0.0732	443	0.9821
dDocent_Contig_3843	283	0.0732	443	0.9821
dDocent_Contig_10174	157	0.07336	442	0.9821
dDocent_Contig_11760	189	0.07353	441	0.9821
dDocent_Contig_11822	120	0.07353	441	0.9821
dDocent_Contig_12876	157	0.07353	441	0.9821
dDocent_Contig_12876	245	0.07353	441	0.9821
dDocent_Contig_21434	231	0.07353	441	0.9821
dDocent_Contig_23596	272	0.07353	441	0.9821
dDocent_Contig_26026	175	0.07353	441	0.9821
dDocent_Contig_24352	171	0.07366	447	0.9821
dDocent_Contig_127	166	0.0737	440	0.9821
dDocent_Contig_17887	189	0.0737	440	0.9821
dDocent_Contig_22825	40	0.0737	440	0.9821
dDocent_Contig_22825	87	0.0737	440	0.9821
dDocent_Contig_3186	216	0.0737	440	0.9821
dDocent_Contig_3304	152	0.0737	440	0.9821
dDocent_Contig_37355	14	0.0737	440	0.9821
dDocent_Contig_41717	255	0.0737	440	0.9821
dDocent_Contig_4179	54	0.0737	440	0.9821
dDocent_Contig_47647	190	0.07383	446	0.9821
dDocent_Contig_10722	290	0.07386	439	0.9821
dDocent_Contig_26603	79	0.07386	439	0.9821
dDocent_Contig_34426	216	0.07386	439	0.9821
dDocent_Contig_6133	39	0.07386	439	0.9821
dDocent_Contig_14149	166	0.07403	438	0.9821
dDocent_Contig_24478	197	0.07403	438	0.9821
dDocent_Contig_27835	116	0.07432	443	0.9821
dDocent_Contig_12180	114	0.07437	436	0.9821
dDocent_Contig_31188	97	0.07437	436	0.9821
dDocent_Contig_32083	95	0.07437	436	0.9821
dDocent_Contig_36918	220	0.07437	436	0.9821
dDocent_Contig_45859	223	0.07437	436	0.9821
dDocent_Contig_46621	47	0.07437	436	0.9821
dDocent_Contig_58306	27	0.07437	436	0.9821
dDocent_Contig_58306	205	0.07437	436	0.9821
dDocent_Contig_6540	229	0.07437	436	0.9821
dDocent_Contig_2239	290	0.07449	442	0.9821
dDocent_Contig_29797	238	0.07449	442	0.9821
dDocent_Contig_25619	210	0.07454	435	0.9821
dDocent_Contig_27400	66	0.07454	435	0.9821
dDocent_Contig_30432	284	0.07454	435	0.9821
dDocent_Contig_44759	168	0.07454	435	0.9821
dDocent_Contig_8378	14	0.07454	435	0.9821
dDocent_Contig_601	181	0.07466	441	0.9821
dDocent_Contig_14311	63	0.07471	434	0.9821
dDocent_Contig_24804	14	0.07471	434	0.9821
dDocent_Contig_35543	42	0.07471	434	0.9821
dDocent_Contig_35543	197	0.07471	434	0.9821
dDocent_Contig_10242	221	0.07483	440	0.9821
dDocent_Contig_10242	255	0.07483	440	0.9821
dDocent_Contig_15409	265	0.07483	440	0.9821
dDocent_Contig_35839	19	0.07483	440	0.9821
dDocent_Contig_20837	227	0.07488	433	0.9821
dDocent_Contig_21200	71	0.07488	433	0.9821
dDocent_Contig_25424	201	0.07488	433	0.9821
dDocent_Contig_45137	196	0.075	439	0.9821
dDocent_Contig_11818	21	0.07506	432	0.9821
dDocent_Contig_1358	30	0.07506	432	0.9821
dDocent_Contig_17582	213	0.07506	432	0.9821
dDocent_Contig_22008	209	0.07506	432	0.9821
dDocent_Contig_28937	245	0.07523	431	0.9821
dDocent_Contig_36938	133	0.07523	431	0.9821
dDocent_Contig_37571	233	0.07523	431	0.9821
dDocent_Contig_44192	224	0.07523	431	0.9821
dDocent_Contig_14578	108	0.07534	437	0.9821
dDocent_Contig_28967	241	0.07541	430	0.9821
dDocent_Contig_45219	97	0.07541	430	0.9821
dDocent_Contig_51549	83	0.07541	430	0.9821
dDocent_Contig_7770	30	0.07541	430	0.9821
dDocent_Contig_10768	62	0.07558	429	0.9821
dDocent_Contig_11982	79	0.07558	429	0.9821
dDocent_Contig_12997	249	0.07558	429	0.9821
dDocent_Contig_12997	262	0.07558	429	0.9821
dDocent_Contig_15824	281	0.07558	429	0.9821
dDocent_Contig_16979	42	0.07558	429	0.9821
dDocent_Contig_17270	52	0.07558	429	0.9821
dDocent_Contig_18727	283	0.07558	429	0.9821
dDocent_Contig_22042	123	0.07558	429	0.9821
dDocent_Contig_22657	99	0.07558	429	0.9821
dDocent_Contig_28603	196	0.07558	429	0.9821
dDocent_Contig_36245	219	0.07558	429	0.9821
dDocent_Contig_37660	268	0.07558	429	0.9821
dDocent_Contig_5305	73	0.07558	429	0.9821
dDocent_Contig_7442	113	0.07558	429	0.9821
dDocent_Contig_8154	3	0.07558	429	0.9821
dDocent_Contig_8154	24	0.07558	429	0.9821
dDocent_Contig_947	183	0.07558	429	0.9821
dDocent_Contig_21463	54	0.07569	435	0.9821
dDocent_Contig_37621	118	0.07569	435	0.9821
dDocent_Contig_5299	205	0.07569	435	0.9821
dDocent_Contig_12320	61	0.07576	428	0.9821
dDocent_Contig_13786	19	0.07576	428	0.9821
dDocent_Contig_25966	273	0.07586	434	0.9821
dDocent_Contig_10798	54	0.07593	427	0.9821
dDocent_Contig_12556	131	0.07593	427	0.9821
dDocent_Contig_19029	204	0.07611	426	0.9821
dDocent_Contig_8121	221	0.07611	426	0.9821
dDocent_Contig_8632	197	0.07629	425	0.9821
dDocent_Contig_11760	138	0.07665	423	0.9821
dDocent_Contig_12136	21	0.07665	423	0.9821
dDocent_Contig_23900	66	0.07665	423	0.9821
dDocent_Contig_23900	104	0.07665	423	0.9821
dDocent_Contig_39119	184	0.07665	423	0.9821
dDocent_Contig_41717	159	0.07665	423	0.9821
dDocent_Contig_5209	215	0.07665	423	0.9821
dDocent_Contig_740	207	0.07665	423	0.9821
dDocent_Contig_27230	213	0.07674	429	0.9821
dDocent_Contig_28392	61	0.07674	429	0.9821
dDocent_Contig_18610	201	0.07683	422	0.9821
dDocent_Contig_46296	164	0.07683	422	0.9821
dDocent_Contig_47949	69	0.07683	422	0.9821
dDocent_Contig_5418	38	0.07683	422	0.9821
dDocent_Contig_5418	163	0.07683	422	0.9821
dDocent_Contig_18905	172	0.07692	428	0.9821
dDocent_Contig_18905	208	0.07692	428	0.9821
dDocent_Contig_18905	262	0.07692	428	0.9821
dDocent_Contig_23115	182	0.0771	427	0.9821
dDocent_Contig_18917	213	0.0772	420	0.9821
dDocent_Contig_34747	41	0.0772	420	0.9821
dDocent_Contig_43469	115	0.0772	420	0.9821
dDocent_Contig_15057	35	0.07728	426	0.9821
dDocent_Contig_3369	91	0.07728	426	0.9821
dDocent_Contig_34398	208	0.07728	426	0.9821
dDocent_Contig_43562	265	0.07728	426	0.9821
dDocent_Contig_9373	193	0.07728	426	0.9821
dDocent_Contig_19676	157	0.07738	419	0.9821
dDocent_Contig_21712	116	0.07738	419	0.9821
dDocent_Contig_21712	197	0.07738	419	0.9821
dDocent_Contig_24350	140	0.07738	419	0.9821
dDocent_Contig_24789	157	0.07738	419	0.9821
dDocent_Contig_17951	203	0.07746	425	0.9821
dDocent_Contig_5979	217	0.07746	425	0.9821
dDocent_Contig_6000	101	0.07746	425	0.9821
dDocent_Contig_19482	64	0.07757	418	0.9821
dDocent_Contig_20547	176	0.07757	418	0.9821
dDocent_Contig_30698	123	0.07757	418	0.9821
dDocent_Contig_36228	219	0.07757	418	0.9821
dDocent_Contig_42788	172	0.07757	418	0.9821
dDocent_Contig_6770	286	0.07757	418	0.9821
dDocent_Contig_49965	159	0.07765	424	0.9821
dDocent_Contig_15214	242	0.07775	417	0.9821
dDocent_Contig_15279	240	0.07775	417	0.9821
dDocent_Contig_16668	63	0.07775	417	0.9821
dDocent_Contig_22419	221	0.07775	417	0.9821
dDocent_Contig_30756	119	0.07775	417	0.9821
dDocent_Contig_5020	282	0.07775	417	0.9821
dDocent_Contig_51870	13	0.07775	417	0.9821
dDocent_Contig_52631	80	0.07775	417	0.9821
dDocent_Contig_1175	242	0.07794	416	0.9821
dDocent_Contig_1175	250	0.07794	416	0.9821
dDocent_Contig_24651	14	0.07794	416	0.9821
dDocent_Contig_8141	92	0.07794	416	0.9821
dDocent_Contig_862	50	0.07794	416	0.9821
dDocent_Contig_2389	24	0.07801	422	0.9821
dDocent_Contig_2571	170	0.07812	415	0.9821
dDocent_Contig_44001	111	0.07812	415	0.9821
dDocent_Contig_12389	273	0.0782	421	0.9821
dDocent_Contig_22011	262	0.0782	421	0.9821
dDocent_Contig_4375	160	0.0782	421	0.9821
dDocent_Contig_32663	283	0.07831	414	0.9821
dDocent_Contig_39364	291	0.07831	414	0.9821
dDocent_Contig_22726	39	0.07838	420	0.9821
dDocent_Contig_33923	8	0.07838	420	0.9821
dDocent_Contig_53015	188	0.07838	420	0.9821
dDocent_Contig_10839	154	0.0785	413	0.9821
dDocent_Contig_22449	40	0.0785	413	0.9821
dDocent_Contig_22449	78	0.0785	413	0.9821
dDocent_Contig_22449	227	0.0785	413	0.9821
dDocent_Contig_3714	35	0.0785	413	0.9821
dDocent_Contig_42977	181	0.0785	413	0.9821
dDocent_Contig_13112	56	0.07857	419	0.9821
dDocent_Contig_15598	162	0.07857	419	0.9821
dDocent_Contig_2239	272	0.07857	419	0.9821
dDocent_Contig_5140	273	0.07857	419	0.9821
dDocent_Contig_36459	83	0.07869	412	0.9821
dDocent_Contig_46932	262	0.07869	412	0.9821
dDocent_Contig_33133	269	0.07876	418	0.9821
dDocent_Contig_1953	111	0.07888	411	0.9821
dDocent_Contig_20985	264	0.07895	417	0.9821
dDocent_Contig_37235	257	0.07895	417	0.9821
dDocent_Contig_47126	17	0.07895	417	0.9821
dDocent_Contig_7045	99	0.07895	417	0.9821
dDocent_Contig_24651	168	0.07908	410	0.9821
dDocent_Contig_8176	193	0.07908	410	0.9821
dDocent_Contig_33785	232	0.07927	409	0.9821
dDocent_Contig_35628	219	0.07927	409	0.9821
dDocent_Contig_35886	218	0.07927	409	0.9821
dDocent_Contig_45109	27	0.07927	409	0.9821
dDocent_Contig_45109	39	0.07927	409	0.9821
dDocent_Contig_45109	53	0.07927	409	0.9821
dDocent_Contig_17782	185	0.07933	415	0.9821
dDocent_Contig_20677	16	0.07933	415	0.9821
dDocent_Contig_48882	287	0.07933	415	0.9821
dDocent_Contig_11025	163	0.07946	408	0.9821
dDocent_Contig_20251	185	0.07946	408	0.9821
dDocent_Contig_4413	106	0.07946	408	0.9821
dDocent_Contig_19905	134	0.07985	406	0.9821
dDocent_Contig_41775	171	0.07985	406	0.9821
dDocent_Contig_56846	180	0.0799	412	0.9821
dDocent_Contig_7294	117	0.0799	412	0.9821
dDocent_Contig_7294	286	0.0799	412	0.9821
dDocent_Contig_11359	93	0.08005	405	0.9821
dDocent_Contig_22553	196	0.08005	405	0.9821
dDocent_Contig_40043	173	0.08005	405	0.9821
dDocent_Contig_28	209	0.0801	411	0.9821
dDocent_Contig_40750	225	0.0801	411	0.9821
dDocent_Contig_15778	276	0.08025	404	0.9821
dDocent_Contig_29441	172	0.08025	404	0.9821
dDocent_Contig_32230	15	0.08025	404	0.9821
dDocent_Contig_16047	232	0.08029	410	0.9821
dDocent_Contig_25388	250	0.08029	410	0.9821
dDocent_Contig_5387	129	0.08045	403	0.9821
dDocent_Contig_15791	53	0.08049	409	0.9821
dDocent_Contig_16233	87	0.08049	409	0.9821
dDocent_Contig_47165	38	0.08049	409	0.9821
dDocent_Contig_11725	57	0.0806	396	0.9821
dDocent_Contig_15085	269	0.0806	396	0.9821
dDocent_Contig_25639	212	0.0806	396	0.9821
dDocent_Contig_43749	126	0.0806	396	0.9821
dDocent_Contig_6839	41	0.0806	396	0.9821
dDocent_Contig_8515	41	0.0806	396	0.9821
dDocent_Contig_20808	8	0.08065	402	0.9821
dDocent_Contig_24405	52	0.08065	402	0.9821
dDocent_Contig_24405	220	0.08065	402	0.9821
dDocent_Contig_11351	268	0.08085	401	0.9821
dDocent_Contig_14327	113	0.08085	401	0.9821
dDocent_Contig_27876	256	0.08085	401	0.9821
dDocent_Contig_29580	221	0.08085	401	0.9821
dDocent_Contig_5994	231	0.08085	401	0.9821
dDocent_Contig_16161	127	0.08101	394	0.9821
dDocent_Contig_16507	38	0.08101	394	0.9821
dDocent_Contig_33015	216	0.08101	394	0.9821
dDocent_Contig_53836	89	0.08101	394	0.9821
dDocent_Contig_8470	60	0.08122	393	0.9821
dDocent_Contig_9532	83	0.08122	393	0.9821
dDocent_Contig_17636	224	0.08125	399	0.9821
dDocent_Contig_24418	224	0.08125	399	0.9821
dDocent_Contig_26565	135	0.08125	399	0.9821
dDocent_Contig_14739	87	0.08128	405	0.9821
dDocent_Contig_12594	284	0.08142	392	0.9821
dDocent_Contig_14282	127	0.08142	392	0.9821
dDocent_Contig_17377	12	0.08142	392	0.9821
dDocent_Contig_20455	206	0.08142	392	0.9821
dDocent_Contig_51238	33	0.08142	392	0.9821
dDocent_Contig_46515	235	0.08145	398	0.9821
dDocent_Contig_51958	22	0.08145	398	0.9821
dDocent_Contig_10237	68	0.08163	391	0.9821
dDocent_Contig_22858	171	0.08163	391	0.9821
dDocent_Contig_25251	159	0.08168	403	0.9821
dDocent_Contig_16785	166	0.08184	390	0.9821
dDocent_Contig_30514	204	0.08184	390	0.9821
dDocent_Contig_32821	81	0.08184	390	0.9821
dDocent_Contig_26709	186	0.08186	396	0.9821
dDocent_Contig_18158	18	0.08205	389	0.9821
dDocent_Contig_21563	22	0.08205	389	0.9821
dDocent_Contig_35540	161	0.08205	389	0.9821
dDocent_Contig_45375	42	0.08205	389	0.9821
dDocent_Contig_10323	243	0.08207	395	0.9821
dDocent_Contig_13121	255	0.08207	395	0.9821
dDocent_Contig_19787	31	0.08207	395	0.9821
dDocent_Contig_46542	219	0.08207	395	0.9821
dDocent_Contig_12568	185	0.08226	388	0.9821
dDocent_Contig_1883	91	0.08226	388	0.9821
dDocent_Contig_18917	235	0.08226	388	0.9821
dDocent_Contig_22723	187	0.08226	388	0.9821
dDocent_Contig_6744	246	0.08226	388	0.9821
dDocent_Contig_41092	256	0.08228	394	0.9821
dDocent_Contig_11456	40	0.08247	387	0.9821
dDocent_Contig_36119	244	0.08247	387	0.9821
dDocent_Contig_4981	263	0.08247	387	0.9821
dDocent_Contig_6330	38	0.08247	387	0.9821
dDocent_Contig_14312	254	0.08249	393	0.9821
dDocent_Contig_26718	96	0.08249	393	0.9821
dDocent_Contig_26789	134	0.08249	393	0.9821
dDocent_Contig_30449	131	0.08249	393	0.9821
dDocent_Contig_10663	141	0.08269	386	0.9821
dDocent_Contig_18889	177	0.08269	386	0.9821
dDocent_Contig_18889	245	0.08269	386	0.9821
dDocent_Contig_40586	78	0.08269	386	0.9821
dDocent_Contig_50601	212	0.08269	386	0.9821
dDocent_Contig_8084	107	0.08269	386	0.9821
dDocent_Contig_9292	11	0.08269	386	0.9821
dDocent_Contig_195	194	0.0827	392	0.9821
dDocent_Contig_19677	154	0.0827	392	0.9821
dDocent_Contig_29419	186	0.0827	392	0.9821
dDocent_Contig_29561	93	0.0827	392	0.9821
dDocent_Contig_44778	233	0.0827	392	0.9821
dDocent_Contig_21585	46	0.08291	391	0.9821
dDocent_Contig_8429	53	0.08291	391	0.9821
dDocent_Contig_20216	39	0.08312	390	0.9821
dDocent_Contig_29451	176	0.08312	384	0.9821
dDocent_Contig_4434	181	0.08312	390	0.9821
dDocent_Contig_8870	230	0.08312	384	0.9821
dDocent_Contig_11288	67	0.08333	383	0.9821
dDocent_Contig_11288	275	0.08333	383	0.9821
dDocent_Contig_13013	119	0.08333	389	0.9821
dDocent_Contig_19421	295	0.08333	383	0.9821
dDocent_Contig_235	259	0.08333	389	0.9821
dDocent_Contig_30960	134	0.08333	383	0.9821
dDocent_Contig_7747	217	0.08333	389	0.9821
dDocent_Contig_15054	260	0.08355	382	0.9821
dDocent_Contig_17476	249	0.08355	388	0.9821
dDocent_Contig_18835	81	0.08355	388	0.9821
dDocent_Contig_20107	175	0.08355	388	0.9821
dDocent_Contig_21488	184	0.08355	388	0.9821
dDocent_Contig_22680	177	0.08355	388	0.9821
dDocent_Contig_29256	13	0.08355	388	0.9821
dDocent_Contig_31674	71	0.08355	388	0.9821
dDocent_Contig_31969	31	0.08355	388	0.9821
dDocent_Contig_4806	77	0.08355	388	0.9821
dDocent_Contig_56038	121	0.08355	388	0.9821
dDocent_Contig_30902	287	0.08376	387	0.9821
dDocent_Contig_38218	62	0.08376	387	0.9821
dDocent_Contig_6748	64	0.08376	387	0.9821
dDocent_Contig_13081	100	0.08377	381	0.9821
dDocent_Contig_15659	282	0.08377	381	0.9821
dDocent_Contig_22490	157	0.08377	381	0.9821
dDocent_Contig_3615	34	0.08377	381	0.9821
dDocent_Contig_47670	104	0.08377	381	0.9821
dDocent_Contig_47670	113	0.08377	381	0.9821
dDocent_Contig_11097	217	0.08399	380	0.9821
dDocent_Contig_16504	267	0.08399	380	0.9821
dDocent_Contig_29643	51	0.08399	380	0.9821
dDocent_Contig_47201	98	0.08399	380	0.9821
dDocent_Contig_52493	116	0.08399	380	0.9821
[truncated: 24,165 more rows]

## Sheet: TableS2e A.dowei females RADtag
#Supplementary Table S2e. RADtags in females of Anableps dowei and their association with the direction of genital asymmetry based on PLINK.
#Columns A-E: output of the association mapping conducted in PLINK.
# CHR: RADtag name. RADtags were named by using the dDocent generated ID.
# SNP: The SNP ID referst to the physical position of the allelic variation in the specific RADtag
# perm.adj.P-value: Empirical p-value obtained from an adaptive permutation test based on the most significant result of ALLELIC, DOM and REC models
# NP: number of permutation replicas conducteed to determine EMP1
#p.BH.adj: P-value corrected for family-wise error for multiple testing using Benjamini-Hochberg false discovery rate
CHR	SNP	perm.adj.P-value	NP	p.BH.adj
dDocent_Contig_10618	36	0.0001633	214334	0.967
dDocent_Contig_35952	51	0.0003038	115219	0.967
dDocent_Contig_34504	154	0.0003882	91450	0.967
dDocent_Contig_12876	187	0.0004991	70122	0.967
dDocent_Contig_46235	117	0.0005176	68587	0.967
dDocent_Contig_21109	274	0.000565	62832	0.967
dDocent_Contig_44299	152	0.0007285	48045	0.967
dDocent_Contig_52544	15	0.0008166	42862	0.967
dDocent_Contig_9252	132	0.0009592	37010	0.967
dDocent_Contig_8248	124	0.001002	35435	0.967
dDocent_Contig_43038	80	0.001133	30897	0.967
dDocent_Contig_27840	28	0.00114	30711	0.967
dDocent_Contig_25551	233	0.001174	29819	0.967
dDocent_Contig_12556	131	0.001333	26259	0.967
dDocent_Contig_15166	124	0.001388	25574	0.967
dDocent_Contig_55694	268	0.00144	24302	0.967
dDocent_Contig_37598	264	0.001496	23402	0.967
dDocent_Contig_35928	285	0.001522	23330	0.967
dDocent_Contig_9632	52	0.001548	22604	0.967
dDocent_Contig_49424	53	0.001636	21390	0.967
dDocent_Contig_12754	266	0.001687	20743	0.967
dDocent_Contig_29069	152	0.00182	19228	0.967
dDocent_Contig_31978	257	0.001824	19188	0.967
dDocent_Contig_49134	102	0.001935	18343	0.967
dDocent_Contig_47676	193	0.001994	17551	0.967
dDocent_Contig_28005	247	0.001998	17515	0.967
dDocent_Contig_29000	96	0.002053	17047	0.967
dDocent_Contig_35184	119	0.002064	16960	0.967
dDocent_Contig_29360	287	0.002141	16348	0.967
dDocent_Contig_601	118	0.002186	16008	0.967
dDocent_Contig_23363	257	0.002188	15992	0.967
dDocent_Contig_18895	250	0.002296	15240	0.967
dDocent_Contig_14917	98	0.002336	14985	0.967
dDocent_Contig_33617	295	0.002398	14595	0.967
dDocent_Contig_2072	189	0.002733	12807	0.967
dDocent_Contig_52461	165	0.002769	12638	0.967
dDocent_Contig_38179	89	0.002801	12495	0.967
dDocent_Contig_20547	176	0.002804	12482	0.967
dDocent_Contig_38690	217	0.002848	12287	0.967
dDocent_Contig_30273	276	0.002951	12027	0.967
dDocent_Contig_41305	126	0.002973	11773	0.967
dDocent_Contig_13429	32	0.003041	11509	0.967
dDocent_Contig_50205	247	0.003068	11569	0.967
dDocent_Contig_6866	176	0.003129	11185	0.967
dDocent_Contig_34321	164	0.003149	11113	0.967
dDocent_Contig_13057	231	0.003215	11041	0.967
dDocent_Contig_27143	101	0.003413	10400	0.967
dDocent_Contig_4612	141	0.003435	10334	0.967
dDocent_Contig_21653	247	0.003513	10103	0.967
dDocent_Contig_11980	279	0.003526	9924	0.967
dDocent_Contig_51604	103	0.00358	9914	0.967
dDocent_Contig_29856	173	0.003581	9774	0.967
dDocent_Contig_10165	107	0.003643	9744	0.967
dDocent_Contig_38993	220	0.003662	9694	0.967
dDocent_Contig_36373	187	0.003663	9554	0.967
dDocent_Contig_274	36	0.00369	9484	0.967
dDocent_Contig_6092	91	0.003715	9554	0.967
dDocent_Contig_31181	222	0.003774	9274	0.967
dDocent_Contig_36321	94	0.003798	9214	0.967
dDocent_Contig_4764	108	0.003882	9144	0.967
dDocent_Contig_18735	202	0.003899	9104	0.967
dDocent_Contig_18684	154	0.00395	8860	0.967
dDocent_Contig_28902	198	0.00395	8986	0.967
dDocent_Contig_15166	67	0.004002	8869	0.967
dDocent_Contig_10189	120	0.004061	8617	0.967
dDocent_Contig_34887	82	0.004166	8401	0.967
dDocent_Contig_36267	29	0.004262	8329	0.967
dDocent_Contig_39537	91	0.004276	8302	0.967
dDocent_Contig_19996	250	0.004385	7981	0.967
dDocent_Contig_33617	305	0.004398	7957	0.967
dDocent_Contig_54628	262	0.004403	7949	0.967
dDocent_Contig_2846	36	0.004447	7869	0.967
dDocent_Contig_30129	198	0.004498	7781	0.967
dDocent_Contig_423	202	0.004563	7669	0.967
dDocent_Contig_27375	267	0.004568	7661	0.967
dDocent_Contig_22754	271	0.004568	7661	0.967
dDocent_Contig_10675	42	0.004633	7661	0.967
dDocent_Contig_31758	260	0.004747	7477	0.967
dDocent_Contig_30814	91	0.004825	7357	0.967
dDocent_Contig_4909	118	0.004836	7237	0.967
dDocent_Contig_23316	85	0.004879	7173	0.967
dDocent_Contig_12977	62	0.00489	7157	0.967
dDocent_Contig_30273	179	0.004901	7141	0.967
dDocent_Contig_19185	160	0.004945	7077	0.967
dDocent_Contig_18735	163	0.004945	7077	0.967
dDocent_Contig_5170	41	0.004948	7173	0.967
dDocent_Contig_12339	46	0.004962	7053	0.967
dDocent_Contig_39698	251	0.004979	7029	0.967
dDocent_Contig_38114	165	0.005077	6893	0.967
dDocent_Contig_10294	252	0.005181	6851	0.967
dDocent_Contig_9854	191	0.005273	6732	0.967
dDocent_Contig_41824	96	0.005453	6417	0.967
dDocent_Contig_2138	207	0.005465	6403	0.967
dDocent_Contig_16533	162	0.005477	6389	0.967
dDocent_Contig_38993	8	0.005594	6256	0.967
dDocent_Contig_32405	253	0.005619	6228	0.967
dDocent_Contig_21437	157	0.00563	6305	0.967
dDocent_Contig_38228	179	0.005702	6137	0.967
dDocent_Contig_32949	249	0.005702	6137	0.967
dDocent_Contig_41419	37	0.005775	6060	0.967
dDocent_Contig_37934	86	0.00579	6130	0.967
dDocent_Contig_18847	97	0.005858	5974	0.967
dDocent_Contig_10377	49	0.005941	5890	0.967
dDocent_Contig_48111	117	0.005966	5866	0.967
dDocent_Contig_14989	17	0.006002	5830	0.967
dDocent_Contig_14989	45	0.006002	5830	0.967
dDocent_Contig_29069	67	0.006077	5758	0.967
dDocent_Contig_52449	241	0.006109	5728	0.967
dDocent_Contig_10030	256	0.006216	5710	0.967
dDocent_Contig_46117	238	0.006229	5698	0.967
dDocent_Contig_22058	181	0.006274	5578	0.967
dDocent_Contig_12533	134	0.006447	5428	0.967
dDocent_Contig_9936	165	0.006475	5482	0.967
dDocent_Contig_5474	289	0.0066	5302	0.967
dDocent_Contig_38117	65	0.006615	5290	0.967
dDocent_Contig_51809	208	0.006623	5284	0.967
dDocent_Contig_39004	192	0.006645	5266	0.967
dDocent_Contig_49693	117	0.006687	5308	0.967
dDocent_Contig_17153	13	0.006776	5164	0.967
dDocent_Contig_12504	15	0.006776	5164	0.967
dDocent_Contig_10613	193	0.00691	4992	0.967
dDocent_Contig_43258	139	0.007029	4907	0.967
dDocent_Contig_6432	80	0.007094	4862	0.967
dDocent_Contig_14142	221	0.007243	4762	0.967
dDocent_Contig_9825	265	0.007251	4757	0.967
dDocent_Contig_4818	112	0.00731	4787	0.967
dDocent_Contig_27775	114	0.007312	4717	0.967
dDocent_Contig_31656	157	0.007503	4597	0.967
dDocent_Contig_40586	78	0.007536	4577	0.967
dDocent_Contig_4359	34	0.007561	4562	0.967
dDocent_Contig_15147	279	0.007619	4527	0.967
dDocent_Contig_17662	219	0.007662	4502	0.967
dDocent_Contig_29688	231	0.007696	4482	0.967
dDocent_Contig_2922	46	0.0078	4422	0.967
dDocent_Contig_47185	280	0.007825	4472	0.967
dDocent_Contig_10189	62	0.007878	4442	0.967
dDocent_Contig_19992	133	0.007926	4352	0.967
dDocent_Contig_835	131	0.007953	4337	0.967
dDocent_Contig_15767	157	0.007976	4387	0.967
dDocent_Contig_38779	276	0.008408	4102	0.967
dDocent_Contig_27036	190	0.008491	4062	0.967
dDocent_Contig_2036	138	0.008533	4042	0.967
dDocent_Contig_16696	195	0.008533	4042	0.967
dDocent_Contig_12163	152	0.008625	4057	0.967
dDocent_Contig_15726	78	0.008627	3998	0.967
dDocent_Contig_13840	198	0.008644	3990	0.967
dDocent_Contig_31611	68	0.00894	3858	0.967
dDocent_Contig_19616	218	0.008959	3850	0.967
dDocent_Contig_865	120	0.009043	3814	0.967
dDocent_Contig_6900	230	0.009043	3814	0.967
dDocent_Contig_50379	88	0.009178	3758	0.967
dDocent_Contig_4661	17	0.009257	3726	0.967
dDocent_Contig_3711	79	0.009321	3754	0.967
dDocent_Contig_4950	133	0.009321	3754	0.967
dDocent_Contig_30713	51	0.009337	3694	0.967
dDocent_Contig_13173	77	0.009439	3654	0.967
dDocent_Contig_14734	102	0.009522	3622	0.967
dDocent_Contig_2093	139	0.009554	3610	0.967
dDocent_Contig_23919	199	0.009607	3590	0.967
dDocent_Contig_27116	188	0.00964	3578	0.967
dDocent_Contig_32552	162	0.009725	3598	0.967
dDocent_Contig_23452	45	0.009768	3582	0.967
dDocent_Contig_12403	105	0.009856	3550	0.967
dDocent_Contig_30713	31	0.009928	3474	0.967
dDocent_Contig_22960	132	0.009928	3474	0.967
dDocent_Contig_56033	160	0.009928	3474	0.967
dDocent_Contig_5796	75	0.009974	3458	0.967
dDocent_Contig_9402	35	0.009986	3454	0.967
dDocent_Contig_12718	127	0.01004	3486	0.967
dDocent_Contig_14632	169	0.01013	3406	0.967
dDocent_Contig_12732	115	0.01015	3398	0.967
dDocent_Contig_10606	184	0.01015	3446	0.967
dDocent_Contig_10426	98	0.01017	3390	0.967
dDocent_Contig_18716	233	0.01025	3366	0.967
dDocent_Contig_14769	56	0.01026	3362	0.967
dDocent_Contig_22186	18	0.01028	3354	0.967
dDocent_Contig_274	41	0.01029	3402	0.967
dDocent_Contig_27993	37	0.01037	3374	0.967
dDocent_Contig_19152	222	0.01041	3362	0.967
dDocent_Contig_43721	22	0.01043	3306	0.967
dDocent_Contig_24603	59	0.01069	3226	0.967
dDocent_Contig_8248	117	0.01083	3230	0.967
dDocent_Contig_5570	107	0.01087	3174	0.967
dDocent_Contig_26051	256	0.01096	3146	0.967
dDocent_Contig_12536	212	0.01106	3118	0.967
dDocent_Contig_19436	15	0.01108	3114	0.967
dDocent_Contig_10352	98	0.01112	3102	0.967
dDocent_Contig_21392	83	0.01116	3090	0.967
dDocent_Contig_28726	123	0.01116	3090	0.967
dDocent_Contig_39744	108	0.01134	3086	0.967
dDocent_Contig_1021	181	0.01134	3086	0.967
dDocent_Contig_9854	9	0.01135	3082	0.967
dDocent_Contig_10294	30	0.01144	3014	0.967
dDocent_Contig_25559	87	0.01144	3014	0.967
dDocent_Contig_4716	272	0.01149	3002	0.967
dDocent_Contig_8343	41	0.01157	2981	0.967
dDocent_Contig_28270	121	0.01157	2981	0.967
dDocent_Contig_26592	34	0.01169	2951	0.967
dDocent_Contig_39645	85	0.01169	2951	0.967
dDocent_Contig_26592	85	0.01169	2951	0.967
dDocent_Contig_6073	233	0.01169	2951	0.967
dDocent_Contig_43469	115	0.01176	2933	0.967
dDocent_Contig_6076	22	0.01177	2930	0.967
dDocent_Contig_2472	215	0.01178	3054	0.967
dDocent_Contig_1014	15	0.01188	2945	0.967
dDocent_Contig_43947	271	0.01195	2885	0.967
dDocent_Contig_35442	220	0.01197	2882	0.967
dDocent_Contig_23793	174	0.012	2873	0.967
dDocent_Contig_23751	99	0.01204	2864	0.967
dDocent_Contig_2016	203	0.01205	2945	0.967
dDocent_Contig_2016	230	0.01205	2945	0.967
dDocent_Contig_5543	115	0.0121	2975	0.967
dDocent_Contig_45425	202	0.01212	2846	0.967
dDocent_Contig_6207	22	0.01219	2870	0.967
dDocent_Contig_4874	178	0.0125	2798	0.967
dDocent_Contig_3084	90	0.01255	2747	0.967
dDocent_Contig_33300	267	0.01255	2747	0.967
dDocent_Contig_21401	210	0.01257	2744	0.967
dDocent_Contig_49707	281	0.0126	2777	0.967
dDocent_Contig_42715	155	0.01271	2714	0.967
dDocent_Contig_23675	19	0.01288	2678	0.967
dDocent_Contig_8217	77	0.01288	2678	0.967
dDocent_Contig_904	159	0.01292	2669	0.967
dDocent_Contig_4363	34	0.01295	2663	0.967
dDocent_Contig_4526	154	0.01304	2684	0.967
dDocent_Contig_11909	201	0.01304	2684	0.967
dDocent_Contig_4085	208	0.01316	2621	0.967
dDocent_Contig_9365	94	0.01323	2606	0.967
dDocent_Contig_3942	185	0.01338	2615	0.967
dDocent_Contig_7355	19	0.01342	2570	0.967
dDocent_Contig_37521	205	0.01343	2606	0.967
dDocent_Contig_14695	50	0.01345	2564	0.967
dDocent_Contig_15225	229	0.01348	2558	0.967
dDocent_Contig_41881	132	0.01374	2510	0.967
dDocent_Contig_10732	254	0.01374	2510	0.967
dDocent_Contig_45166	189	0.01379	2537	0.967
dDocent_Contig_51870	13	0.01387	2486	0.967
dDocent_Contig_12505	155	0.01391	2516	0.967
dDocent_Contig_18098	103	0.01402	2459	0.967
dDocent_Contig_22078	109	0.01402	2495	0.967
dDocent_Contig_21641	288	0.01406	2489	0.967
dDocent_Contig_31324	74	0.01409	2447	0.967
dDocent_Contig_2922	188	0.01413	2441	0.967
dDocent_Contig_2922	204	0.01413	2441	0.967
dDocent_Contig_1117	269	0.0142	2429	0.967
dDocent_Contig_1117	279	0.0142	2429	0.967
dDocent_Contig_11413	234	0.01423	2423	0.967
dDocent_Contig_40635	158	0.01426	2453	0.967
dDocent_Contig_9663	180	0.01429	2414	0.967
dDocent_Contig_34114	270	0.01436	2402	0.967
dDocent_Contig_31159	34	0.01437	2435	0.967
dDocent_Contig_2542	33	0.01438	2399	0.967
dDocent_Contig_35563	13	0.01441	2393	0.967
dDocent_Contig_49405	272	0.01441	2393	0.967
dDocent_Contig_13060	183	0.01443	2390	0.967
dDocent_Contig_27627	28	0.01445	2387	0.967
dDocent_Contig_18096	45	0.01448	2381	0.967
dDocent_Contig_18096	81	0.01448	2381	0.967
dDocent_Contig_18096	87	0.01448	2381	0.967
dDocent_Contig_6826	98	0.0145	2378	0.967
dDocent_Contig_17034	118	0.0145	2378	0.967
dDocent_Contig_16861	35	0.01452	2375	0.967
dDocent_Contig_16653	52	0.01463	2357	0.967
dDocent_Contig_28603	27	0.01486	2321	0.967
dDocent_Contig_28603	114	0.01486	2321	0.967
dDocent_Contig_21624	69	0.01488	2318	0.967
dDocent_Contig_2741	81	0.01498	2336	0.967
dDocent_Contig_26470	65	0.01501	2297	0.967
dDocent_Contig_27627	139	0.01501	2297	0.967
dDocent_Contig_26470	153	0.01501	2297	0.967
dDocent_Contig_39737	153	0.01503	2294	0.967
dDocent_Contig_20093	156	0.01515	2276	0.967
dDocent_Contig_26537	156	0.01519	2270	0.967
dDocent_Contig_13471	41	0.01523	2264	0.967
dDocent_Contig_11942	87	0.01527	2291	0.967
dDocent_Contig_11942	287	0.01527	2291	0.967
dDocent_Contig_9312	32	0.01537	2243	0.967
dDocent_Contig_24606	291	0.01546	2231	0.967
dDocent_Contig_3664	170	0.01547	2261	0.967
dDocent_Contig_24350	140	0.01556	2249	0.967
dDocent_Contig_25702	225	0.01562	2240	0.967
dDocent_Contig_20291	287	0.01566	2234	0.967
dDocent_Contig_35449	175	0.01567	2201	0.967
dDocent_Contig_24674	132	0.01569	2198	0.967
dDocent_Contig_29032	256	0.01569	2198	0.967
dDocent_Contig_24987	248	0.01571	2195	0.967
dDocent_Contig_21893	273	0.01571	2195	0.967
dDocent_Contig_33938	213	0.01573	2192	0.967
dDocent_Contig_1844	128	0.01584	2177	0.967
dDocent_Contig_24477	170	0.01584	2177	0.967
dDocent_Contig_28241	272	0.01591	2168	0.967
dDocent_Contig_25848	69	0.01595	2162	0.967
dDocent_Contig_32292	243	0.01599	2156	0.967
dDocent_Contig_27770	183	0.01604	2150	0.967
dDocent_Contig_47680	163	0.01608	2144	0.967
dDocent_Contig_5979	217	0.01613	2138	0.967
dDocent_Contig_4074	160	0.01614	2168	0.967
dDocent_Contig_46704	109	0.0162	2129	0.967
dDocent_Contig_43165	182	0.01622	2126	0.967
dDocent_Contig_58103	75	0.01627	2150	0.967
dDocent_Contig_43273	165	0.01631	2114	0.967
dDocent_Contig_52847	173	0.01632	2144	0.967
dDocent_Contig_10098	257	0.01645	2096	0.967
dDocent_Contig_17657	39	0.01646	2126	0.967
dDocent_Contig_11035	111	0.01646	2126	0.967
dDocent_Contig_16824	215	0.01646	2126	0.967
dDocent_Contig_20811	270	0.0165	2120	0.967
dDocent_Contig_30731	113	0.01655	2084	0.967
dDocent_Contig_28397	23	0.01664	2072	0.967
dDocent_Contig_20616	193	0.01669	2096	0.967
dDocent_Contig_5196	232	0.01669	2096	0.967
dDocent_Contig_4167	279	0.01669	2066	0.967
dDocent_Contig_12526	84	0.01671	2093	0.967
dDocent_Contig_10618	206	0.01676	2057	0.967
dDocent_Contig_239	128	0.01681	2051	0.967
dDocent_Contig_26371	215	0.01691	2039	0.967
dDocent_Contig_2878	22	0.01701	2027	0.967
dDocent_Contig_56631	55	0.01709	2018	0.967
dDocent_Contig_15201	11	0.01711	2015	0.967
dDocent_Contig_26573	186	0.01714	2012	0.967
dDocent_Contig_11948	187	0.01726	2027	0.967
dDocent_Contig_4818	42	0.01729	1994	0.967
dDocent_Contig_6882	12	0.01731	1992	0.967
dDocent_Contig_6882	208	0.01731	1992	0.967
dDocent_Contig_21859	167	0.01735	1988	0.967
dDocent_Contig_16469	141	0.01736	1986	0.967
dDocent_Contig_29202	12	0.01744	2006	0.967
dDocent_Contig_29202	30	0.01744	2006	0.967
dDocent_Contig_29202	43	0.01744	2006	0.967
dDocent_Contig_29202	52	0.01744	2006	0.967
dDocent_Contig_29202	57	0.01744	2006	0.967
dDocent_Contig_29202	66	0.01744	2006	0.967
dDocent_Contig_29202	74	0.01744	2006	0.967
dDocent_Contig_29202	129	0.01744	2006	0.967
dDocent_Contig_24284	278	0.01744	2006	0.967
dDocent_Contig_5675	38	0.01745	1976	0.967
dDocent_Contig_21379	222	0.01745	1976	0.967
dDocent_Contig_23470	173	0.01749	1972	0.967
dDocent_Contig_6452	51	0.0175	1970	0.967
dDocent_Contig_28244	265	0.01752	1968	0.967
dDocent_Contig_6495	21	0.01753	1996	0.967
dDocent_Contig_20033	44	0.01754	1966	0.967
dDocent_Contig_5311	141	0.01758	1962	0.967
dDocent_Contig_51615	41	0.01761	1958	0.967
dDocent_Contig_20942	91	0.01763	1984	0.967
dDocent_Contig_53699	152	0.01765	1982	0.967
dDocent_Contig_12577	164	0.01767	1952	0.967
dDocent_Contig_2272	274	0.01767	1980	0.967
dDocent_Contig_2272	283	0.01767	1980	0.967
dDocent_Contig_34909	171	0.01774	1944	0.967
dDocent_Contig_8411	49	0.01778	1968	0.967
dDocent_Contig_34862	104	0.01783	1934	0.967
dDocent_Contig_14383	139	0.01785	1932	0.967
dDocent_Contig_24818	163	0.01788	1928	0.967
dDocent_Contig_2048	222	0.0179	1926	0.967
dDocent_Contig_20796	233	0.0179	1926	0.967
dDocent_Contig_5445	275	0.01792	1952	0.967
dDocent_Contig_1169	251	0.01794	1922	0.967
dDocent_Contig_12945	19	0.01798	1918	0.967
dDocent_Contig_17509	248	0.01805	1910	0.967
dDocent_Contig_37033	243	0.01809	1906	0.967
dDocent_Contig_16118	117	0.01811	1904	0.967
dDocent_Contig_16118	153	0.01811	1904	0.967
dDocent_Contig_16017	191	0.01815	1900	0.967
dDocent_Contig_43122	228	0.01815	1900	0.967
dDocent_Contig_9577	209	0.01819	1896	0.967
dDocent_Contig_8984	206	0.01821	1894	0.967
dDocent_Contig_18727	236	0.01823	1892	0.967
dDocent_Contig_44887	90	0.01834	1880	0.967
dDocent_Contig_21587	265	0.01834	1880	0.967
dDocent_Contig_15741	58	0.01841	1900	0.967
dDocent_Contig_9462	42	0.01846	1868	0.967
dDocent_Contig_9181	48	0.01846	1868	0.967
dDocent_Contig_2167	156	0.01849	1892	0.967
dDocent_Contig_7379	158	0.0185	1864	0.967
dDocent_Contig_26147	172	0.01852	1862	0.967
dDocent_Contig_10185	228	0.01852	1862	0.967
dDocent_Contig_9311	48	0.01859	1882	0.967
dDocent_Contig_13499	43	0.01863	1878	0.967
dDocent_Contig_6341	204	0.01868	1846	0.967
dDocent_Contig_20520	70	0.01869	1872	0.967
dDocent_Contig_2146	69	0.0187	1844	0.967
dDocent_Contig_8114	120	0.01876	1838	0.967
dDocent_Contig_10164	87	0.01884	1830	0.967
dDocent_Contig_9022	135	0.01886	1828	0.967
dDocent_Contig_25406	217	0.01887	1854	0.967
dDocent_Contig_21304	90	0.01897	1818	0.967
dDocent_Contig_40732	27	0.01903	1812	0.967
dDocent_Contig_1193	64	0.01903	1838	0.967
dDocent_Contig_12423	20	0.01911	1804	0.967
dDocent_Contig_6239	114	0.01911	1804	0.967
dDocent_Contig_12027	220	0.01911	1804	0.967
dDocent_Contig_342	126	0.01914	1828	0.967
dDocent_Contig_23515	271	0.01918	1798	0.967
dDocent_Contig_44365	215	0.0192	1796	0.967
dDocent_Contig_17657	182	0.01926	1790	0.967
dDocent_Contig_17657	278	0.01926	1790	0.967
dDocent_Contig_47212	272	0.01928	1814	0.967
dDocent_Contig_39887	193	0.01933	1784	0.967
dDocent_Contig_9109	284	0.01935	1782	0.967
dDocent_Contig_2290	68	0.01941	1776	0.967
dDocent_Contig_41948	271	0.01941	1776	0.967
dDocent_Contig_39904	268	0.01948	1770	0.967
dDocent_Contig_19447	138	0.0195	1768	0.967
dDocent_Contig_23563	13	0.01955	1764	0.967
dDocent_Contig_58103	195	0.01961	1758	0.967
dDocent_Contig_14975	120	0.01963	1782	0.967
dDocent_Contig_30967	5	0.01979	1742	0.967
dDocent_Contig_48352	166	0.01979	1742	0.967
dDocent_Contig_18953	212	0.01981	1766	0.967
dDocent_Contig_8453	248	0.01981	1766	0.967
dDocent_Contig_27735	161	0.01988	1734	0.967
dDocent_Contig_2072	238	0.01991	1732	0.967
dDocent_Contig_18703	44	0.01995	1728	0.967
dDocent_Contig_50379	103	0.01995	1728	0.967
dDocent_Contig_8946	261	0.02006	1744	0.967
dDocent_Contig_28961	159	0.02007	1718	0.967
dDocent_Contig_11319	60	0.0201	1740	0.967
dDocent_Contig_37959	120	0.02012	1714	0.967
dDocent_Contig_16163	258	0.0202	1732	0.967
dDocent_Contig_29451	248	0.02022	1730	0.967
dDocent_Contig_33999	173	0.02026	1702	0.967
dDocent_Contig_8723	39	0.0204	1690	0.967
dDocent_Contig_29897	195	0.02041	1714	0.967
dDocent_Contig_40326	212	0.02058	1700	0.967
dDocent_Contig_22397	84	0.0206	1674	0.967
dDocent_Contig_24913	23	0.02067	1692	0.967
dDocent_Contig_24913	34	0.02067	1692	0.967
dDocent_Contig_7751	190	0.02067	1692	0.967
dDocent_Contig_5324	42	0.0207	1666	0.967
dDocent_Contig_14425	51	0.02075	1662	0.967
dDocent_Contig_3889	124	0.02077	1660	0.967
dDocent_Contig_27639	178	0.02077	1660	0.967
dDocent_Contig_14151	24	0.0208	1682	0.967
dDocent_Contig_12537	232	0.0208	1658	0.967
dDocent_Contig_20141	61	0.02082	1656	0.967
dDocent_Contig_9013	56	0.02092	1648	0.967
dDocent_Contig_17782	57	0.02097	1644	0.967
dDocent_Contig_2741	36	0.02126	1622	0.967
dDocent_Contig_2741	52	0.02126	1622	0.967
dDocent_Contig_25551	26	0.02138	1636	0.967
dDocent_Contig_7685	259	0.02147	1606	0.967
dDocent_Contig_33373	229	0.02151	1626	0.967
dDocent_Contig_19873	228	0.02152	1602	0.967
dDocent_Contig_42420	42	0.02173	1564	0.967
dDocent_Contig_19961	225	0.02185	1578	0.967
dDocent_Contig_203	86	0.02201	1544	0.967
dDocent_Contig_13943	209	0.02219	1554	0.967
dDocent_Contig_8707	91	0.02242	1538	0.967
dDocent_Contig_11373	11	0.02247	1512	0.967
dDocent_Contig_11642	116	0.0225	1532	0.967
dDocent_Contig_982	16	0.02256	1528	0.967
dDocent_Contig_982	28	0.02256	1528	0.967
dDocent_Contig_24478	127	0.02262	1502	0.967
dDocent_Contig_8962	88	0.02265	1500	0.967
dDocent_Contig_30598	178	0.02265	1522	0.967
dDocent_Contig_23017	111	0.02277	1492	0.967
dDocent_Contig_22270	135	0.0228	1490	0.967
dDocent_Contig_1445	48	0.02292	1504	0.967
dDocent_Contig_2272	244	0.02296	1480	0.967
dDocent_Contig_12915	239	0.02305	1474	0.967
dDocent_Contig_42850	235	0.02318	1466	0.967
dDocent_Contig_23869	40	0.02321	1464	0.967
dDocent_Contig_11078	19	0.02324	1462	0.967
dDocent_Contig_9960	121	0.02336	1476	0.967
dDocent_Contig_8446	129	0.02336	1476	0.967
dDocent_Contig_24845	79	0.02337	1454	0.967
dDocent_Contig_362	268	0.02342	1472	0.967
dDocent_Contig_2272	234	0.02349	1468	0.967
dDocent_Contig_22334	182	0.02353	1444	0.967
dDocent_Contig_4708	185	0.02353	1444	0.967
dDocent_Contig_12564	159	0.02361	1460	0.967
dDocent_Contig_25406	86	0.02366	1436	0.967
dDocent_Contig_4389	159	0.02366	1436	0.967
dDocent_Contig_59218	66	0.02369	1434	0.967
dDocent_Contig_8216	291	0.02373	1432	0.967
dDocent_Contig_28575	113	0.02379	1428	0.967
dDocent_Contig_37909	119	0.02381	1448	0.967
dDocent_Contig_6430	157	0.02381	1448	0.967
dDocent_Contig_2082	280	0.02386	1424	0.967
dDocent_Contig_13097	110	0.02394	1440	0.967
dDocent_Contig_45333	90	0.02396	1418	0.967
dDocent_Contig_3779	133	0.02403	1414	0.967
dDocent_Contig_12686	139	0.02413	1408	0.967
dDocent_Contig_13972	38	0.0242	1404	0.967
dDocent_Contig_10684	20	0.02421	1424	0.967
dDocent_Contig_12778	256	0.02428	1420	0.967
dDocent_Contig_17904	19	0.02434	1396	0.967
dDocent_Contig_24383	30	0.02441	1392	0.967
dDocent_Contig_9204	219	0.02441	1392	0.967
dDocent_Contig_2865	222	0.02441	1392	0.967
dDocent_Contig_15767	168	0.02451	1386	0.967
dDocent_Contig_6696	15	0.02452	1406	0.967
dDocent_Contig_179	59	0.02456	1404	0.967
dDocent_Contig_37364	208	0.02466	1378	0.967
dDocent_Contig_37623	275	0.02477	1392	0.967
dDocent_Contig_8745	278	0.02477	1392	0.967
dDocent_Contig_20361	129	0.02484	1368	0.967
dDocent_Contig_12931	169	0.02487	1366	0.967
dDocent_Contig_14535	175	0.02487	1386	0.967
dDocent_Contig_362	270	0.02487	1366	0.967
dDocent_Contig_2056	169	0.02491	1364	0.967
dDocent_Contig_34501	271	0.02498	1360	0.967
dDocent_Contig_22540	141	0.02502	1358	0.967
dDocent_Contig_31181	170	0.02502	1358	0.967
dDocent_Contig_34771	38	0.02509	1374	0.967
dDocent_Contig_6698	174	0.02509	1354	0.967
dDocent_Contig_18917	61	0.02513	1372	0.967
dDocent_Contig_20715	78	0.02513	1352	0.967
dDocent_Contig_14706	166	0.02517	1350	0.967
dDocent_Contig_10369	35	0.0252	1348	0.967
dDocent_Contig_13779	67	0.0252	1348	0.967
dDocent_Contig_36374	256	0.02527	1364	0.967
dDocent_Contig_14976	111	0.02528	1344	0.967
dDocent_Contig_51996	274	0.02528	1344	0.967
dDocent_Contig_28331	290	0.02528	1344	0.967
dDocent_Contig_53593	255	0.02531	1362	0.967
dDocent_Contig_26425	170	0.02532	1342	0.967
dDocent_Contig_34630	55	0.02535	1340	0.967
dDocent_Contig_21180	75	0.02535	1340	0.967
dDocent_Contig_12644	164	0.02539	1338	0.967
dDocent_Contig_37874	242	0.02542	1356	0.967
dDocent_Contig_33079	219	0.02543	1336	0.967
dDocent_Contig_27709	286	0.02543	1336	0.967
dDocent_Contig_3019	206	0.02551	1332	0.967
dDocent_Contig_32233	212	0.02562	1326	0.967
dDocent_Contig_59245	279	0.02569	1342	0.967
dDocent_Contig_2188	264	0.02578	1318	0.967
dDocent_Contig_31511	286	0.02582	1316	0.967
dDocent_Contig_7746	186	0.02588	1332	0.967
dDocent_Contig_11948	221	0.02588	1332	0.967
dDocent_Contig_669	224	0.02588	1332	0.967
dDocent_Contig_14933	230	0.02597	1308	0.967
dDocent_Contig_24138	168	0.02601	1306	0.967
dDocent_Contig_38993	176	0.02601	1306	0.967
dDocent_Contig_11413	270	0.02601	1306	0.967
dDocent_Contig_30658	73	0.02616	1318	0.967
dDocent_Contig_11294	65	0.02621	1296	0.967
dDocent_Contig_15503	177	0.02621	1296	0.967
dDocent_Contig_5517	266	0.02632	1310	0.967
dDocent_Contig_22713	239	0.02638	1288	0.967
dDocent_Contig_30249	272	0.02638	1288	0.967
dDocent_Contig_11718	273	0.0264	1306	0.967
dDocent_Contig_13834	136	0.02642	1286	0.967
dDocent_Contig_45901	253	0.02642	1286	0.967
dDocent_Contig_38739	238	0.02646	1284	0.967
dDocent_Contig_22186	59	0.0265	1282	0.967
dDocent_Contig_22186	71	0.0265	1282	0.967
dDocent_Contig_22186	80	0.0265	1282	0.967
dDocent_Contig_5061	36	0.02654	1280	0.967
dDocent_Contig_36789	253	0.02656	1298	0.967
dDocent_Contig_10189	158	0.02662	1276	0.967
dDocent_Contig_2663	47	0.02671	1272	0.967
dDocent_Contig_7006	107	0.02679	1268	0.967
dDocent_Contig_23010	277	0.02681	1286	0.967
dDocent_Contig_2456	100	0.02692	1262	0.967
dDocent_Contig_37001	141	0.02696	1260	0.967
dDocent_Contig_27421	29	0.02706	1274	0.967
dDocent_Contig_10225	93	0.0271	1272	0.967
dDocent_Contig_204	237	0.02714	1270	0.967
dDocent_Contig_28940	36	0.02722	1248	0.967
dDocent_Contig_36122	53	0.02722	1248	0.967
dDocent_Contig_178	87	0.02722	1248	0.967
dDocent_Contig_28940	195	0.02722	1248	0.967
dDocent_Contig_6893	265	0.02722	1248	0.967
dDocent_Contig_30255	273	0.02722	1248	0.967
dDocent_Contig_24277	127	0.02727	1246	0.967
dDocent_Contig_42977	181	0.02749	1254	0.967
dDocent_Contig_12403	254	0.02753	1252	0.967
dDocent_Contig_9984	25	0.02758	1232	0.967
dDocent_Contig_24913	106	0.02758	1232	0.967
dDocent_Contig_24287	122	0.02758	1232	0.967
dDocent_Contig_6283	231	0.02766	1228	0.967
dDocent_Contig_29294	233	0.02766	1228	0.967
dDocent_Contig_30453	113	0.02776	1242	0.967
dDocent_Contig_14249	155	0.02776	1224	0.967
dDocent_Contig_4085	71	0.0278	1222	0.967
dDocent_Contig_1509	71	0.02785	1238	0.967
dDocent_Contig_4305	235	0.02789	1236	0.967
dDocent_Contig_35948	184	0.02794	1216	0.967
dDocent_Contig_11980	90	0.02798	1214	0.967
dDocent_Contig_11294	75	0.02812	1208	0.967
dDocent_Contig_16470	201	0.02816	1224	0.967
dDocent_Contig_39326	259	0.02816	1224	0.967
dDocent_Contig_12854	135	0.02817	1206	0.967
dDocent_Contig_23431	28	0.02822	1204	0.967
dDocent_Contig_23431	51	0.02822	1204	0.967
dDocent_Contig_43968	186	0.02822	1204	0.967
dDocent_Contig_22250	119	0.02826	1202	0.967
dDocent_Contig_19185	47	0.0284	1196	0.967
dDocent_Contig_16329	73	0.0284	1196	0.967
dDocent_Contig_25033	116	0.02845	1194	0.967
dDocent_Contig_18787	82	0.0285	1192	0.967
dDocent_Contig_34745	188	0.02855	1190	0.967
dDocent_Contig_4623	247	0.02855	1190	0.967
dDocent_Contig_20591	286	0.02855	1190	0.967
dDocent_Contig_10618	26	0.0286	1188	0.967
dDocent_Contig_39976	258	0.02877	1198	0.967
dDocent_Contig_864	66	0.02879	1180	0.967
dDocent_Contig_38912	128	0.02882	1196	0.967
dDocent_Contig_370	200	0.02882	1196	0.967
dDocent_Contig_370	234	0.02882	1196	0.967
dDocent_Contig_12936	59	0.02892	1192	0.967
dDocent_Contig_32269	30	0.02904	1170	0.967
dDocent_Contig_32269	68	0.02904	1170	0.967
dDocent_Contig_274	208	0.02904	1170	0.967
dDocent_Contig_27541	193	0.02908	1168	0.967
dDocent_Contig_14357	72	0.02916	1182	0.967
dDocent_Contig_17438	42	0.02926	1178	0.967
dDocent_Contig_7867	112	0.02936	1174	0.967
dDocent_Contig_52646	70	0.02939	1156	0.967
dDocent_Contig_13173	43	0.02954	1150	0.967
dDocent_Contig_4471	186	0.02956	1166	0.967
dDocent_Contig_21061	197	0.02964	1146	0.967
dDocent_Contig_6758	200	0.02964	1146	0.967
dDocent_Contig_6758	266	0.02964	1146	0.967
dDocent_Contig_24287	95	0.02966	1162	0.967
dDocent_Contig_16996	259	0.02969	1144	0.967
dDocent_Contig_17400	260	0.02972	1160	0.967
dDocent_Contig_10386	198	0.02975	1142	0.967
dDocent_Contig_2130	16	0.02977	1158	0.967
dDocent_Contig_50741	24	0.0298	1140	0.967
dDocent_Contig_2534	125	0.03003	1148	0.967
dDocent_Contig_11405	64	0.03006	1130	0.967
dDocent_Contig_5061	122	0.03008	1146	0.967
dDocent_Contig_17358	69	0.03017	1126	0.967
dDocent_Contig_17358	75	0.03017	1126	0.967
dDocent_Contig_28961	254	0.03017	1126	0.967
dDocent_Contig_11228	57	0.03028	1122	0.967
dDocent_Contig_20758	138	0.03029	1138	0.967
dDocent_Contig_26453	125	0.03033	1120	0.967
dDocent_Contig_43922	228	0.03038	1118	0.967
dDocent_Contig_35860	292	0.03038	1118	0.967
dDocent_Contig_1833	163	0.0304	1134	0.967
dDocent_Contig_35125	111	0.03044	1116	0.967
dDocent_Contig_26563	258	0.03049	1114	0.967
dDocent_Contig_46636	280	0.03049	1114	0.967
dDocent_Contig_41357	273	0.03055	1112	0.967
dDocent_Contig_11736	267	0.03056	1128	0.967
dDocent_Contig_3217	61	0.03071	1106	0.967
dDocent_Contig_5388	194	0.03071	1106	0.967
dDocent_Contig_38275	120	0.03078	1120	0.967
dDocent_Contig_9532	267	0.03078	1120	0.967
dDocent_Contig_24651	58	0.03083	1118	0.967
dDocent_Contig_4526	169	0.03083	1118	0.967
dDocent_Contig_20942	188	0.03083	1102	0.967
dDocent_Contig_4526	233	0.03083	1118	0.967
dDocent_Contig_8490	248	0.03088	1100	0.967
dDocent_Contig_47201	98	0.03122	1088	0.967
dDocent_Contig_13257	133	0.03122	1104	0.967
dDocent_Contig_23563	200	0.03134	1084	0.967
dDocent_Contig_25009	34	0.03139	1082	0.967
dDocent_Contig_25009	53	0.03139	1082	0.967
dDocent_Contig_25009	115	0.03139	1082	0.967
dDocent_Contig_10352	210	0.03139	1082	0.967
dDocent_Contig_4471	162	0.0315	1110	0.967
dDocent_Contig_22063	254	0.03151	1078	0.967
dDocent_Contig_2794	278	0.03151	1078	0.967
dDocent_Contig_40383	46	0.03157	1076	0.967
dDocent_Contig_25378	222	0.03157	1076	0.967
dDocent_Contig_20308	9	0.03163	1074	0.967
dDocent_Contig_12144	255	0.03168	1088	0.967
dDocent_Contig_31220	77	0.03181	1068	0.967
dDocent_Contig_42047	82	0.03192	1064	0.967
dDocent_Contig_2685	163	0.03192	1064	0.967
dDocent_Contig_2542	168	0.03192	1064	0.967
dDocent_Contig_6234	225	0.03192	1064	0.967
dDocent_Contig_2685	251	0.03192	1064	0.967
dDocent_Contig_30389	52	0.03205	1060	0.967
dDocent_Contig_22199	123	0.03205	1060	0.967
dDocent_Contig_41357	283	0.03217	1056	0.967
dDocent_Contig_32439	43	0.03233	1066	0.967
dDocent_Contig_13630	123	0.03235	1050	0.967
dDocent_Contig_28339	178	0.03239	1064	0.967
dDocent_Contig_19976	24	0.03246	1062	0.967
dDocent_Contig_32838	184	0.03246	1062	0.967
dDocent_Contig_7302	11	0.03258	1058	0.967
dDocent_Contig_33162	44	0.03266	1040	0.967
dDocent_Contig_21061	206	0.03272	1038	0.967
dDocent_Contig_4018	204	0.03276	1052	0.967
dDocent_Contig_15395	50	0.03279	1036	0.967
dDocent_Contig_3213	270	0.03279	1036	0.967
dDocent_Contig_38584	204	0.03291	1032	0.967
dDocent_Contig_4228	91	0.03304	1028	0.967
dDocent_Contig_4228	121	0.03304	1028	0.967
dDocent_Contig_40252	203	0.03304	1028	0.967
dDocent_Contig_4228	241	0.03304	1028	0.967
dDocent_Contig_10354	5	0.03308	1042	0.967
dDocent_Contig_43862	215	0.03317	1024	0.967
dDocent_Contig_12011	108	0.03324	1022	0.967
dDocent_Contig_42669	219	0.03327	1036	0.967
dDocent_Contig_28967	125	0.0333	1020	0.967
dDocent_Contig_27688	137	0.03343	1016	0.967
dDocent_Contig_5394	59	0.0335	1014	0.967
dDocent_Contig_23068	218	0.03353	1028	0.967
dDocent_Contig_44681	223	0.03366	1024	0.967
dDocent_Contig_35407	61	0.0337	1008	0.967
dDocent_Contig_37136	135	0.0337	1008	0.967
dDocent_Contig_30402	55	0.03372	1022	0.967
dDocent_Contig_19101	253	0.03372	1022	0.967
dDocent_Contig_19071	277	0.03376	1006	0.967
dDocent_Contig_43749	126	0.03379	1020	0.967
dDocent_Contig_23036	169	0.03383	1004	0.967
dDocent_Contig_5165	247	0.03383	1004	0.967
dDocent_Contig_13452	108	0.03386	1018	0.967
dDocent_Contig_10927	102	0.03392	1016	0.967
dDocent_Contig_18963	218	0.03392	1016	0.967
dDocent_Contig_7586	94	0.03406	1012	0.967
dDocent_Contig_152	195	0.03406	1012	0.967
dDocent_Contig_42226	102	0.03419	1008	0.967
dDocent_Contig_11039	120	0.0344	1002	0.967
dDocent_Contig_33378	81	0.03448	985	0.967
dDocent_Contig_17115	213	0.03448	985	0.967
dDocent_Contig_15197	221	0.03462	981	0.967
dDocent_Contig_1065	72	0.03469	979	0.967
dDocent_Contig_12260	12	0.03478	991	0.967
dDocent_Contig_12931	210	0.03478	991	0.967
dDocent_Contig_12931	258	0.03478	991	0.967
dDocent_Contig_12931	278	0.03478	991	0.967
dDocent_Contig_43674	189	0.03491	973	0.967
dDocent_Contig_23610	79	0.03494	972	0.967
dDocent_Contig_6510	272	0.03494	972	0.967
dDocent_Contig_935	173	0.03498	971	0.967
dDocent_Contig_4389	59	0.03502	970	0.967
dDocent_Contig_23455	39	0.03512	967	0.967
dDocent_Contig_5347	244	0.03512	967	0.967
dDocent_Contig_17623	212	0.03517	980	0.967
dDocent_Contig_38699	51	0.03528	977	0.967
dDocent_Contig_3267	73	0.03528	977	0.967
dDocent_Contig_22047	28	0.03534	961	0.967
dDocent_Contig_4874	278	0.03535	975	0.967
dDocent_Contig_9178	170	0.03538	960	0.967
dDocent_Contig_12038	106	0.03557	969	0.967
dDocent_Contig_43256	266	0.03568	966	0.967
dDocent_Contig_14131	159	0.03571	951	0.967
dDocent_Contig_21093	261	0.03571	951	0.967
dDocent_Contig_17103	10	0.03583	948	0.967
dDocent_Contig_41881	208	0.03594	945	0.967
dDocent_Contig_41881	280	0.03594	945	0.967
dDocent_Contig_29451	51	0.03606	942	0.967
dDocent_Contig_31946	73	0.03606	942	0.967
dDocent_Contig_31674	83	0.03609	955	0.967
dDocent_Contig_14975	101	0.03629	936	0.967
dDocent_Contig_26035	37	0.03632	935	0.967
dDocent_Contig_26035	69	0.03632	935	0.967
dDocent_Contig_27446	36	0.0364	933	0.967
dDocent_Contig_15038	176	0.0364	933	0.967
dDocent_Contig_6772	189	0.03647	945	0.967
dDocent_Contig_42338	242	0.03649	917	0.967
dDocent_Contig_28230	261	0.03652	930	0.967
dDocent_Contig_7250	32	0.03653	916	0.967
dDocent_Contig_35818	32	0.03656	929	0.967
dDocent_Contig_45132	52	0.03656	929	0.967
dDocent_Contig_12790	133	0.03665	913	0.967
dDocent_Contig_5538	137	0.03665	913	0.967
dDocent_Contig_8615	28	0.03668	926	0.967
dDocent_Contig_19135	164	0.03668	926	0.967
dDocent_Contig_33299	212	0.03669	912	0.967
dDocent_Contig_7229	18	0.03674	938	0.967
dDocent_Contig_7229	114	0.03674	938	0.967
dDocent_Contig_20329	152	0.03674	938	0.967
dDocent_Contig_7229	195	0.03674	938	0.967
dDocent_Contig_22288	242	0.03676	924	0.967
dDocent_Contig_16477	24	0.0368	923	0.967
dDocent_Contig_4483	171	0.0368	923	0.967
dDocent_Contig_10005	189	0.03681	909	0.967
dDocent_Contig_35845	20	0.03688	921	0.967
dDocent_Contig_34846	272	0.03688	921	0.967
dDocent_Contig_54075	167	0.03702	904	0.967
dDocent_Contig_1514	132	0.03714	901	0.967
dDocent_Contig_1514	189	0.03714	901	0.967
dDocent_Contig_631	305	0.03718	900	0.967
dDocent_Contig_16035	87	0.03722	899	0.967
dDocent_Contig_46629	173	0.03731	897	0.967
dDocent_Contig_29980	49	0.03739	895	0.967
dDocent_Contig_20847	67	0.03739	895	0.967
dDocent_Contig_891	85	0.03739	895	0.967
dDocent_Contig_37190	34	0.03743	894	0.967
dDocent_Contig_20488	107	0.03743	894	0.967
dDocent_Contig_4284	245	0.03747	893	0.967
dDocent_Contig_3919	268	0.03747	893	0.967
dDocent_Contig_9120	227	0.03761	903	0.967
dDocent_Contig_15131	113	0.03764	889	0.967
dDocent_Contig_15318	170	0.03765	902	0.967
dDocent_Contig_23758	129	0.03768	888	0.967
dDocent_Contig_42406	178	0.03769	901	0.967
dDocent_Contig_28581	234	0.03773	887	0.967
dDocent_Contig_19694	166	0.03781	885	0.967
dDocent_Contig_4277	227	0.03781	885	0.967
dDocent_Contig_946	139	0.03786	897	0.967
dDocent_Contig_7835	283	0.03786	897	0.967
dDocent_Contig_17910	208	0.03798	881	0.967
dDocent_Contig_41835	260	0.03798	881	0.967
dDocent_Contig_2029	125	0.03802	880	0.967
dDocent_Contig_7501	117	0.0382	876	0.967
dDocent_Contig_38690	221	0.0382	876	0.967
dDocent_Contig_7501	278	0.0382	876	0.967
dDocent_Contig_14221	63	0.03824	875	0.967
dDocent_Contig_5096	86	0.03829	874	0.967
dDocent_Contig_13031	278	0.03829	874	0.967
dDocent_Contig_5382	179	0.03855	881	0.967
dDocent_Contig_17847	258	0.03859	867	0.967
dDocent_Contig_4068	53	0.03872	877	0.967
dDocent_Contig_5628	121	0.03873	864	0.967
dDocent_Contig_734	162	0.03873	864	0.967
dDocent_Contig_12121	193	0.03877	876	0.967
dDocent_Contig_3550	260	0.03881	875	0.967
dDocent_Contig_2052	20	0.03882	862	0.967
dDocent_Contig_17423	227	0.03882	862	0.967
dDocent_Contig_2072	130	0.03886	861	0.967
dDocent_Contig_7164	189	0.03886	861	0.967
dDocent_Contig_12469	38	0.03895	859	0.967
dDocent_Contig_45965	52	0.03895	859	0.967
dDocent_Contig_54097	154	0.03895	859	0.967
dDocent_Contig_23643	171	0.03895	859	0.967
dDocent_Contig_11107	220	0.03895	859	0.967
dDocent_Contig_17644	62	0.03899	871	0.967
dDocent_Contig_2783	259	0.039	858	0.967
dDocent_Contig_33638	33	0.03904	857	0.967
dDocent_Contig_20054	107	0.03904	857	0.967
dDocent_Contig_9976	223	0.03904	857	0.967
dDocent_Contig_29356	80	0.03909	856	0.967
dDocent_Contig_20842	10	0.03914	855	0.967
dDocent_Contig_4580	46	0.03914	855	0.967
dDocent_Contig_7104	271	0.03914	855	0.967
dDocent_Contig_2878	275	0.03914	855	0.967
dDocent_Contig_5445	84	0.03918	854	0.967
dDocent_Contig_12995	160	0.03922	866	0.967
dDocent_Contig_17072	77	0.03926	865	0.967
dDocent_Contig_35609	132	0.03927	852	0.967
dDocent_Contig_8455	83	0.03932	851	0.967
dDocent_Contig_31649	182	0.03932	851	0.967
dDocent_Contig_19268	220	0.03932	851	0.967
dDocent_Contig_32059	201	0.03941	849	0.967
dDocent_Contig_33678	136	0.03946	848	0.967
dDocent_Contig_7115	15	0.03949	860	0.967
dDocent_Contig_39937	196	0.0395	847	0.967
dDocent_Contig_23363	261	0.0395	847	0.967
dDocent_Contig_20180	283	0.0395	847	0.967
dDocent_Contig_2121	77	0.03964	844	0.967
dDocent_Contig_3215	67	0.03972	855	0.967
dDocent_Contig_12889	182	0.03972	855	0.967
dDocent_Contig_12667	254	0.03972	855	0.967
dDocent_Contig_29067	250	0.03979	841	0.967
dDocent_Contig_18909	180	0.03983	840	0.967
dDocent_Contig_45654	98	0.03988	839	0.967
dDocent_Contig_254	183	0.03988	839	0.967
dDocent_Contig_8844	39	0.03993	838	0.967
dDocent_Contig_23584	31	0.03998	837	0.967
dDocent_Contig_6833	106	0.03998	837	0.967
dDocent_Contig_5531	134	0.03998	837	0.967
dDocent_Contig_2465	28	0.04	849	0.967
dDocent_Contig_12403	53	0.04	849	0.967
dDocent_Contig_21746	197	0.04007	835	0.967
dDocent_Contig_15348	181	0.04009	847	0.967
dDocent_Contig_2558	246	0.04009	847	0.967
dDocent_Contig_32971	46	0.04017	833	0.967
dDocent_Contig_33299	171	0.04017	833	0.967
dDocent_Contig_34903	80	0.04019	845	0.967
dDocent_Contig_18801	66	0.04026	831	0.967
dDocent_Contig_33884	190	0.04026	831	0.967
dDocent_Contig_6279	193	0.04026	831	0.967
dDocent_Contig_32876	284	0.04026	831	0.967
dDocent_Contig_16996	174	0.04031	830	0.967
dDocent_Contig_16233	195	0.04031	830	0.967
dDocent_Contig_2599	246	0.04031	830	0.967
dDocent_Contig_28206	157	0.04041	828	0.967
dDocent_Contig_2745	75	0.04046	827	0.967
dDocent_Contig_11925	188	0.04056	825	0.967
dDocent_Contig_35168	70	0.04061	824	0.967
dDocent_Contig_35168	108	0.04061	824	0.967
dDocent_Contig_6320	225	0.04066	823	0.967
dDocent_Contig_6320	242	0.04066	823	0.967
dDocent_Contig_41092	256	0.04067	835	0.967
dDocent_Contig_8791	184	0.0408	820	0.967
dDocent_Contig_19890	268	0.04091	830	0.967
dDocent_Contig_26572	36	0.04095	817	0.967
dDocent_Contig_43162	258	0.041	816	0.967
dDocent_Contig_28308	217	0.04105	815	0.967
dDocent_Contig_44900	134	0.04111	826	0.967
dDocent_Contig_37623	183	0.04121	824	0.967
dDocent_Contig_45490	21	0.04126	811	0.967
dDocent_Contig_18434	216	0.04141	808	0.967
dDocent_Contig_12590	106	0.04146	807	0.967
dDocent_Contig_22374	28	0.04151	818	0.967
dDocent_Contig_4440	217	0.04151	818	0.967
dDocent_Contig_4440	218	0.04151	818	0.967
dDocent_Contig_27375	53	0.04156	805	0.967
dDocent_Contig_5428	16	0.04167	815	0.967
dDocent_Contig_14855	172	0.04167	803	0.967
dDocent_Contig_17608	286	0.04172	802	0.967
dDocent_Contig_10622	285	0.04188	799	0.967
dDocent_Contig_32389	99	0.04193	798	0.967
dDocent_Contig_28383	275	0.04193	798	0.967
dDocent_Contig_5445	34	0.04198	797	0.967
dDocent_Contig_542	76	0.04198	797	0.967
dDocent_Contig_52889	101	0.04198	797	0.967
dDocent_Contig_21746	176	0.04198	809	0.967
dDocent_Contig_4034	282	0.04203	808	0.967
dDocent_Contig_14989	260	0.04214	794	0.967
dDocent_Contig_30982	287	0.04219	793	0.967
dDocent_Contig_10746	17	0.04224	792	0.967
dDocent_Contig_10746	260	0.04224	792	0.967
dDocent_Contig_5445	11	0.04235	790	0.967
dDocent_Contig_11169	31	0.04235	790	0.967
dDocent_Contig_28230	111	0.04246	788	0.967
dDocent_Contig_14151	87	0.0425	799	0.967
dDocent_Contig_10352	229	0.0425	799	0.967
dDocent_Contig_3076	20	0.04251	787	0.967
dDocent_Contig_46502	95	0.04251	787	0.967
dDocent_Contig_10566	24	0.04268	784	0.967
dDocent_Contig_27228	21	0.04289	780	0.967
dDocent_Contig_25211	73	0.04289	780	0.967
dDocent_Contig_3247	57	0.04295	779	0.967
dDocent_Contig_15458	73	0.043	778	0.967
dDocent_Contig_9292	66	0.04317	775	0.967
dDocent_Contig_9292	256	0.04317	775	0.967
dDocent_Contig_39260	163	0.0432	786	0.967
dDocent_Contig_21402	276	0.0432	786	0.967
dDocent_Contig_37576	91	0.04323	774	0.967
dDocent_Contig_9250	95	0.04323	774	0.967
dDocent_Contig_914	202	0.04323	774	0.967
dDocent_Contig_5196	63	0.04334	772	0.967
dDocent_Contig_19502	152	0.04334	772	0.967
dDocent_Contig_45341	171	0.04334	772	0.967
dDocent_Contig_29089	11	0.04339	771	0.967
dDocent_Contig_16265	242	0.04339	771	0.967
dDocent_Contig_17156	103	0.04348	781	0.967
dDocent_Contig_16682	109	0.04359	779	0.967
dDocent_Contig_16	114	0.04359	779	0.967
dDocent_Contig_21746	178	0.04359	779	0.967
dDocent_Contig_13394	29	0.04362	767	0.967
dDocent_Contig_8107	213	0.04368	766	0.967
dDocent_Contig_13619	241	0.0437	777	0.967
dDocent_Contig_41437	130	0.04373	765	0.967
dDocent_Contig_5837	159	0.04373	765	0.967
dDocent_Contig_9559	29	0.04385	763	0.967
dDocent_Contig_3121	118	0.04385	763	0.967
dDocent_Contig_24082	121	0.04385	763	0.967
dDocent_Contig_18412	129	0.04385	763	0.967
dDocent_Contig_18006	90	0.04393	773	0.967
dDocent_Contig_41945	222	0.04402	760	0.967
dDocent_Contig_21434	180	0.04404	771	0.967
dDocent_Contig_20495	233	0.04408	759	0.967
dDocent_Contig_947	183	0.04414	758	0.967
dDocent_Contig_16994	114	0.04416	769	0.967
dDocent_Contig_33362	258	0.0442	757	0.967
dDocent_Contig_7126	162	0.04427	767	0.967
dDocent_Contig_3083	84	0.04431	755	0.967
dDocent_Contig_36345	153	0.04433	766	0.967
dDocent_Contig_33494	82	0.04437	754	0.967
dDocent_Contig_35014	211	0.04443	753	0.967
dDocent_Contig_36812	265	0.04443	753	0.967
dDocent_Contig_1232	288	0.04443	753	0.967
dDocent_Contig_4895	227	0.04449	752	0.967
dDocent_Contig_24065	48	0.04461	750	0.967
dDocent_Contig_13816	12	0.04462	761	0.967
dDocent_Contig_29194	221	0.04468	760	0.967
dDocent_Contig_36258	101	0.04473	748	0.967
dDocent_Contig_5840	133	0.04473	748	0.967
dDocent_Contig_39103	19	0.04479	747	0.967
dDocent_Contig_39103	24	0.04479	747	0.967
dDocent_Contig_18742	110	0.04479	747	0.967
dDocent_Contig_1279	197	0.04479	747	0.967
dDocent_Contig_10412	61	0.04491	745	0.967
dDocent_Contig_10412	71	0.04491	745	0.967
dDocent_Contig_2685	79	0.04491	745	0.967
dDocent_Contig_30276	83	0.04491	745	0.967
dDocent_Contig_31091	57	0.04503	743	0.967
dDocent_Contig_3984	131	0.04509	753	0.967
dDocent_Contig_28639	263	0.04509	753	0.967
dDocent_Contig_19298	77	0.04515	741	0.967
dDocent_Contig_33263	229	0.04515	741	0.967
dDocent_Contig_22501	8	0.04527	739	0.967
dDocent_Contig_5460	16	0.04527	739	0.967
dDocent_Contig_38709	27	0.04527	739	0.967
dDocent_Contig_30128	43	0.04527	739	0.967
dDocent_Contig_10245	162	0.04527	739	0.967
dDocent_Contig_6832	184	0.04527	739	0.967
dDocent_Contig_7457	193	0.04527	739	0.967
dDocent_Contig_11179	287	0.04527	739	0.967
dDocent_Contig_2091	159	0.04533	738	0.967
dDocent_Contig_7004	168	0.04533	738	0.967
dDocent_Contig_37653	152	0.04545	736	0.967
dDocent_Contig_49276	14	0.04552	735	0.967
dDocent_Contig_1176	25	0.04552	735	0.967
dDocent_Contig_22063	29	0.04552	735	0.967
dDocent_Contig_22063	98	0.04552	735	0.967
dDocent_Contig_17620	139	0.04552	735	0.967
dDocent_Contig_29284	203	0.04552	735	0.967
dDocent_Contig_29284	215	0.04552	735	0.967
dDocent_Contig_12412	225	0.04558	734	0.967
dDocent_Contig_50483	129	0.04564	733	0.967
dDocent_Contig_33031	171	0.0457	732	0.967
dDocent_Contig_10507	217	0.0457	732	0.967
dDocent_Contig_10298	10	0.04577	731	0.967
dDocent_Contig_16112	183	0.04582	741	0.967
dDocent_Contig_13089	230	0.04583	730	0.967
dDocent_Contig_13089	235	0.04583	730	0.967
dDocent_Contig_7283	261	0.04583	730	0.967
dDocent_Contig_13089	295	0.04583	730	0.967
dDocent_Contig_41164	242	0.04589	729	0.967
dDocent_Contig_10462	24	0.04602	727	0.967
dDocent_Contig_1358	30	0.04602	727	0.967
dDocent_Contig_1148	246	0.04602	727	0.967
dDocent_Contig_12686	185	0.04607	737	0.967
dDocent_Contig_25491	111	0.04608	726	0.967
dDocent_Contig_40089	112	0.04608	726	0.967
dDocent_Contig_5445	158	0.04608	726	0.967
dDocent_Contig_44141	164	0.04608	726	0.967
dDocent_Contig_38827	140	0.04614	725	0.967
dDocent_Contig_4246	138	0.04621	724	0.967
dDocent_Contig_23947	141	0.04627	723	0.967
dDocent_Contig_26358	54	0.04633	722	0.967
dDocent_Contig_17290	273	0.04633	722	0.967
dDocent_Contig_40732	8	0.0464	721	0.967
dDocent_Contig_44683	229	0.0464	721	0.967
dDocent_Contig_7117	124	0.04646	720	0.967
dDocent_Contig_21825	129	0.04646	720	0.967
dDocent_Contig_28794	228	0.04651	730	0.967
dDocent_Contig_42355	7	0.04653	719	0.967
dDocent_Contig_42355	32	0.04653	719	0.967
dDocent_Contig_9402	72	0.04653	719	0.967
dDocent_Contig_26921	124	0.04653	719	0.967
dDocent_Contig_7414	267	0.04653	719	0.967
dDocent_Contig_43975	285	0.04653	719	0.967
dDocent_Contig_13279	112	0.04658	729	0.967
dDocent_Contig_1496	254	0.04659	718	0.967
dDocent_Contig_49730	153	0.04672	716	0.967
dDocent_Contig_28121	274	0.04679	715	0.967
dDocent_Contig_47310	15	0.04683	725	0.967
dDocent_Contig_22438	262	0.04683	725	0.967
dDocent_Contig_20743	82	0.04685	714	0.967
dDocent_Contig_53098	154	0.04685	714	0.967
dDocent_Contig_34835	290	0.04685	714	0.967
dDocent_Contig_719	10	0.04698	712	0.967
dDocent_Contig_719	95	0.04698	712	0.967
dDocent_Contig_10449	276	0.04698	712	0.967
dDocent_Contig_3401	97	0.04705	711	0.967
dDocent_Contig_16722	194	0.04705	711	0.967
dDocent_Contig_388	200	0.04705	711	0.967
dDocent_Contig_18329	248	0.04705	711	0.967
dDocent_Contig_7189	264	0.04705	711	0.967
dDocent_Contig_1509	273	0.04705	711	0.967
dDocent_Contig_34603	16	0.04712	710	0.967
dDocent_Contig_34603	67	0.04712	710	0.967
dDocent_Contig_36018	160	0.04712	710	0.967
dDocent_Contig_43779	245	0.04712	710	0.967
dDocent_Contig_43779	275	0.04712	710	0.967
dDocent_Contig_43779	288	0.04712	710	0.967
dDocent_Contig_11416	255	0.04718	709	0.967
dDocent_Contig_14388	284	0.04718	709	0.967
dDocent_Contig_5873	87	0.04722	719	0.967
dDocent_Contig_28738	63	0.04725	708	0.967
dDocent_Contig_18859	95	0.04725	708	0.967
dDocent_Contig_11448	169	0.04729	718	0.967
dDocent_Contig_29561	178	0.04729	718	0.967
dDocent_Contig_35868	46	0.04732	707	0.967
dDocent_Contig_28525	176	0.04732	707	0.967
dDocent_Contig_14732	184	0.04738	706	0.967
dDocent_Contig_28502	249	0.04738	706	0.967
dDocent_Contig_43051	223	0.04742	716	0.967
dDocent_Contig_17518	50	0.04745	705	0.967
dDocent_Contig_11803	85	0.04745	705	0.967
dDocent_Contig_21859	62	0.04752	704	0.967
dDocent_Contig_1124	124	0.04752	704	0.967
dDocent_Contig_13619	187	0.04752	704	0.967
dDocent_Contig_50373	263	0.04755	714	0.967
dDocent_Contig_18526	82	0.04765	702	0.967
dDocent_Contig_35868	152	0.04765	702	0.967
dDocent_Contig_58346	187	0.04765	702	0.967
dDocent_Contig_6597	282	0.04765	702	0.967
dDocent_Contig_16651	115	0.04772	701	0.967
dDocent_Contig_39887	15	0.04782	710	0.967
dDocent_Contig_12128	36	0.04786	699	0.967
dDocent_Contig_46339	109	0.04786	699	0.967
dDocent_Contig_17790	115	0.04786	699	0.967
dDocent_Contig_11550	301	0.04786	699	0.967
dDocent_Contig_16612	118	0.04793	698	0.967
dDocent_Contig_31912	264	0.04793	698	0.967
dDocent_Contig_5474	135	0.04795	708	0.967
dDocent_Contig_28244	190	0.04806	696	0.967
dDocent_Contig_51417	25	0.04816	705	0.967
dDocent_Contig_839	69	0.0482	694	0.967
dDocent_Contig_19828	93	0.0482	694	0.967
dDocent_Contig_58712	118	0.0482	694	0.967
dDocent_Contig_21624	137	0.0482	694	0.967
dDocent_Contig_22540	256	0.04827	693	0.967
dDocent_Contig_12878	103	0.04841	691	0.967
dDocent_Contig_43425	112	0.04841	691	0.967
dDocent_Contig_31504	118	0.04841	691	0.967
dDocent_Contig_6127	121	0.04841	691	0.967
dDocent_Contig_30040	137	0.04841	691	0.967
dDocent_Contig_35563	216	0.04841	691	0.967
dDocent_Contig_54024	64	0.04855	689	0.967
dDocent_Contig_4189	159	0.04855	689	0.967
dDocent_Contig_23319	242	0.04855	689	0.967
dDocent_Contig_14229	283	0.04862	688	0.967
dDocent_Contig_370	68	0.04871	697	0.967
dDocent_Contig_1527	123	0.04878	696	0.967
dDocent_Contig_3931	134	0.04883	685	0.967
dDocent_Contig_9087	261	0.04883	685	0.967
dDocent_Contig_9200	109	0.04898	683	0.967
dDocent_Contig_9048	125	0.04898	683	0.967
dDocent_Contig_2219	171	0.04898	683	0.967
dDocent_Contig_12180	114	0.04899	693	0.967
dDocent_Contig_5810	35	0.04905	682	0.967
dDocent_Contig_15233	152	0.04905	682	0.967
dDocent_Contig_32164	28	0.04912	681	0.967
dDocent_Contig_3960	86	0.04912	681	0.967
dDocent_Contig_32164	155	0.04912	681	0.967
dDocent_Contig_6455	202	0.04912	681	0.967
dDocent_Contig_4205	253	0.04912	681	0.967
dDocent_Contig_19409	15	0.04919	680	0.967
dDocent_Contig_11880	89	0.04919	680	0.967
dDocent_Contig_14515	172	0.04919	680	0.967
dDocent_Contig_21403	163	0.0492	690	0.967
dDocent_Contig_22540	152	0.04926	679	0.967
dDocent_Contig_40566	16	0.04928	689	0.967
dDocent_Contig_17432	195	0.04928	689	0.967
dDocent_Contig_50277	215	0.04928	689	0.967
dDocent_Contig_8755	47	0.04934	678	0.967
dDocent_Contig_8002	194	0.04935	688	0.967
dDocent_Contig_31951	76	0.04941	677	0.967
dDocent_Contig_21732	105	0.04941	677	0.967
dDocent_Contig_4226	185	0.04941	677	0.967
dDocent_Contig_49567	213	0.04941	677	0.967
dDocent_Contig_37219	259	0.04941	677	0.967
dDocent_Contig_37219	280	0.04941	677	0.967
dDocent_Contig_46071	18	0.04948	676	0.967
dDocent_Contig_28201	25	0.04948	676	0.967
dDocent_Contig_25662	40	0.04948	676	0.967
dDocent_Contig_10109	215	0.04949	686	0.967
dDocent_Contig_29763	50	0.04956	675	0.967
dDocent_Contig_43891	101	0.04963	674	0.967
dDocent_Contig_15388	135	0.04963	674	0.967
dDocent_Contig_16031	140	0.04963	674	0.967
dDocent_Contig_16031	221	0.04963	674	0.967
dDocent_Contig_13149	247	0.04963	674	0.967
dDocent_Contig_24151	219	0.0497	673	0.967
dDocent_Contig_15233	122	0.04978	682	0.967
dDocent_Contig_6073	174	0.04978	672	0.967
dDocent_Contig_740	283	0.04978	672	0.967
dDocent_Contig_17861	70	0.04993	670	0.967
dDocent_Contig_44523	190	0.05	669	0.967
dDocent_Contig_37074	44	0.05007	668	0.967
dDocent_Contig_37074	66	0.05007	668	0.967
dDocent_Contig_37074	155	0.05007	668	0.967
dDocent_Contig_2258	282	0.05007	668	0.967
dDocent_Contig_34197	122	0.05015	667	0.967
dDocent_Contig_36203	132	0.05022	666	0.967
dDocent_Contig_11060	158	0.05022	666	0.967
dDocent_Contig_43699	276	0.0503	675	0.967
dDocent_Contig_573	114	0.05045	663	0.967
dDocent_Contig_982	217	0.05052	672	0.967
dDocent_Contig_57327	277	0.05052	672	0.967
dDocent_Contig_16369	161	0.0506	661	0.967
dDocent_Contig_1883	302	0.0506	671	0.967
dDocent_Contig_9973	107	0.05076	659	0.967
dDocent_Contig_9973	115	0.05076	659	0.967
dDocent_Contig_975	132	0.05076	659	0.967
dDocent_Contig_51809	185	0.05076	659	0.967
dDocent_Contig_30418	93	0.05082	668	0.967
dDocent_Contig_45686	239	0.05082	668	0.967
dDocent_Contig_631	19	0.05091	657	0.967
dDocent_Contig_10406	226	0.05091	657	0.967
dDocent_Contig_33598	24	0.05099	656	0.967
dDocent_Contig_27846	111	0.05099	656	0.967
dDocent_Contig_28273	159	0.05099	656	0.967
dDocent_Contig_25447	256	0.05099	656	0.967
dDocent_Contig_2917	82	0.05113	664	0.967
dDocent_Contig_10235	226	0.05115	654	0.967
dDocent_Contig_20714	26	0.0513	652	0.967
dDocent_Contig_12479	124	0.0513	652	0.967
dDocent_Contig_6901	163	0.0513	652	0.967
dDocent_Contig_20714	179	0.0513	652	0.967
dDocent_Contig_4580	218	0.0513	652	0.967
dDocent_Contig_14536	112	0.05132	642	0.967
dDocent_Contig_47669	119	0.05132	642	0.967
dDocent_Contig_21647	130	0.05132	642	0.967
dDocent_Contig_27762	131	0.05132	642	0.967
dDocent_Contig_11736	284	0.05132	642	0.967
dDocent_Contig_31967	63	0.05138	651	0.967
dDocent_Contig_14283	73	0.05138	651	0.967
dDocent_Contig_24816	75	0.05144	660	0.967
dDocent_Contig_38584	222	0.05144	660	0.967
dDocent_Contig_45135	92	0.05146	650	0.967
dDocent_Contig_3698	124	0.05146	650	0.967
dDocent_Contig_4552	100	0.05148	640	0.967
dDocent_Contig_18787	71	0.05152	659	0.967
dDocent_Contig_18428	23	0.05156	639	0.967
dDocent_Contig_26516	32	0.05162	648	0.967
dDocent_Contig_6796	222	0.05172	637	0.967
dDocent_Contig_52013	194	0.05181	636	0.967
dDocent_Contig_40955	120	0.05189	635	0.967
dDocent_Contig_11909	120	0.05189	635	0.967
dDocent_Contig_9607	17	0.05194	644	0.967
dDocent_Contig_17041	280	0.05197	634	0.967
dDocent_Contig_36115	55	0.05205	633	0.967
dDocent_Contig_17443	283	0.05205	633	0.967
dDocent_Contig_30201	21	0.0521	642	0.967
dDocent_Contig_46248	229	0.05213	632	0.967
dDocent_Contig_14639	16	0.05222	631	0.967
dDocent_Contig_24470	221	0.05222	631	0.967
dDocent_Contig_18117	212	0.0523	630	0.967
dDocent_Contig_406	243	0.0523	630	0.967
dDocent_Contig_18631	130	0.05234	639	0.967
dDocent_Contig_1147	61	0.05238	629	0.967
dDocent_Contig_8310	106	0.05238	629	0.967
dDocent_Contig_27675	40	0.05246	628	0.967
dDocent_Contig_214	170	0.05255	627	0.967
dDocent_Contig_55429	171	0.05263	626	0.967
dDocent_Contig_38970	210	0.05272	625	0.967
dDocent_Contig_31410	254	0.05272	625	0.967
dDocent_Contig_41848	179	0.0528	624	0.967
dDocent_Contig_6825	79	0.05288	623	0.967
dDocent_Contig_19313	281	0.05297	622	0.967
dDocent_Contig_9864	75	0.05305	621	0.967
dDocent_Contig_24430	66	0.05314	620	0.967
dDocent_Contig_46385	48	0.05323	619	0.967
dDocent_Contig_4202	185	0.05323	619	0.967
dDocent_Contig_23306	273	0.05331	618	0.967
dDocent_Contig_9929	42	0.05334	627	0.967
dDocent_Contig_4504	16	0.0534	617	0.967
dDocent_Contig_13725	32	0.0534	617	0.967
dDocent_Contig_38394	33	0.0534	617	0.967
dDocent_Contig_38394	188	0.0534	617	0.967
dDocent_Contig_29393	77	0.05348	616	0.967
dDocent_Contig_13279	243	0.05348	616	0.967
dDocent_Contig_29393	246	0.05348	616	0.967
dDocent_Contig_23115	182	0.05351	625	0.967
dDocent_Contig_7819	231	0.05357	615	0.967
dDocent_Contig_13802	31	0.0536	624	0.967
dDocent_Contig_25609	52	0.0536	624	0.967
dDocent_Contig_3703	80	0.0536	624	0.967
dDocent_Contig_20333	165	0.05377	622	0.967
dDocent_Contig_28196	17	0.05386	621	0.967
dDocent_Contig_19668	125	0.05386	621	0.967
dDocent_Contig_43144	134	0.05392	611	0.967
dDocent_Contig_48188	182	0.05392	611	0.967
dDocent_Contig_7804	141	0.05401	610	0.967
dDocent_Contig_15792	110	0.05421	617	0.967
dDocent_Contig_30827	30	0.05428	607	0.967
dDocent_Contig_20732	93	0.05437	606	0.967
dDocent_Contig_1168	189	0.05437	606	0.967
dDocent_Contig_20755	74	0.05438	615	0.967
dDocent_Contig_34705	102	0.05438	615	0.967
dDocent_Contig_20776	219	0.05438	615	0.967
dDocent_Contig_14156	29	0.05446	605	0.967
dDocent_Contig_47878	69	0.05446	605	0.967
dDocent_Contig_7950	138	0.05446	605	0.967
dDocent_Contig_25142	266	0.05446	605	0.967
dDocent_Contig_16777	263	0.05447	614	0.967
dDocent_Contig_20796	49	0.05455	604	0.967
dDocent_Contig_29370	12	0.05456	613	0.967
dDocent_Contig_12048	20	0.05456	613	0.967
dDocent_Contig_49714	14	0.05464	603	0.967
dDocent_Contig_11817	34	0.05464	603	0.967
dDocent_Contig_34956	50	0.05464	603	0.967
dDocent_Contig_2254	61	0.05464	603	0.967
dDocent_Contig_16614	95	0.05464	603	0.967
dDocent_Contig_35025	120	0.05464	603	0.967
dDocent_Contig_15282	164	0.05464	603	0.967
dDocent_Contig_26472	182	0.05464	603	0.967
dDocent_Contig_47235	190	0.05464	603	0.967
dDocent_Contig_56303	264	0.05465	612	0.967
dDocent_Contig_52547	65	0.05473	602	0.967
dDocent_Contig_52547	70	0.05473	602	0.967
dDocent_Contig_14793	119	0.05482	601	0.967
dDocent_Contig_27861	174	0.05483	610	0.967
dDocent_Contig_16265	141	0.05491	600	0.967
dDocent_Contig_12334	105	0.05492	609	0.967
dDocent_Contig_26809	214	0.05492	609	0.967
dDocent_Contig_39522	288	0.05492	609	0.967
dDocent_Contig_23543	22	0.05501	608	0.967
dDocent_Contig_16447	100	0.05518	597	0.967
dDocent_Contig_45664	164	0.05518	597	0.967
dDocent_Contig_43053	190	0.05518	597	0.967
dDocent_Contig_15320	42	0.05528	596	0.967
dDocent_Contig_8982	101	0.05528	596	0.967
dDocent_Contig_8781	110	0.05528	605	0.967
dDocent_Contig_45428	201	0.05528	596	0.967
dDocent_Contig_2552	268	0.05528	596	0.967
dDocent_Contig_8781	282	0.05528	605	0.967
dDocent_Contig_37817	71	0.05537	595	0.967
dDocent_Contig_37193	271	0.05537	595	0.967
dDocent_Contig_14917	190	0.05546	594	0.967
dDocent_Contig_1905	262	0.05546	603	0.967
dDocent_Contig_48780	244	0.05556	602	0.967
dDocent_Contig_9245	52	0.05565	592	0.967
dDocent_Contig_5814	210	0.05565	601	0.967
dDocent_Contig_9245	251	0.05565	592	0.967
dDocent_Contig_17530	48	0.05583	599	0.967
dDocent_Contig_489	23	0.05602	597	0.967
dDocent_Contig_37083	9	0.05603	588	0.967
dDocent_Contig_23544	140	0.05603	588	0.967
dDocent_Contig_57205	32	0.05621	595	0.967
dDocent_Contig_22663	131	0.0563	594	0.967
dDocent_Contig_21115	127	0.05631	585	0.967
dDocent_Contig_25625	223	0.05631	585	0.967
dDocent_Contig_1841	264	0.05631	585	0.967
dDocent_Contig_2470	153	0.0564	593	0.967
dDocent_Contig_18405	167	0.05651	583	0.967
dDocent_Contig_15917	259	0.05659	591	0.967
dDocent_Contig_46366	159	0.0566	582	0.967
dDocent_Contig_36168	194	0.0566	582	0.967
dDocent_Contig_16622	230	0.0566	582	0.967
dDocent_Contig_6467	266	0.0566	582	0.967
dDocent_Contig_12249	125	0.0567	581	0.967
dDocent_Contig_38572	7	0.05678	589	0.967
dDocent_Contig_40675	120	0.0568	580	0.967
dDocent_Contig_40675	128	0.0568	580	0.967
dDocent_Contig_29080	167	0.05688	588	0.967
dDocent_Contig_30570	70	0.05697	587	0.967
dDocent_Contig_16021	116	0.05697	587	0.967
dDocent_Contig_30192	231	0.05697	587	0.967
dDocent_Contig_23342	243	0.05697	587	0.967
dDocent_Contig_21607	100	0.05699	578	0.967
dDocent_Contig_48319	141	0.05699	578	0.967
dDocent_Contig_28353	165	0.05699	578	0.967
dDocent_Contig_14292	169	0.05699	578	0.967
dDocent_Contig_19276	203	0.05699	578	0.967
dDocent_Contig_2865	91	0.05709	577	0.967
dDocent_Contig_30356	213	0.05729	575	0.967
dDocent_Contig_56519	216	0.05729	575	0.967
dDocent_Contig_24563	264	0.05729	575	0.967
dDocent_Contig_7771	129	0.05739	574	0.967
dDocent_Contig_27670	235	0.05739	574	0.967
dDocent_Contig_2762	167	0.05746	582	0.967
dDocent_Contig_3853	17	0.05749	573	0.967
dDocent_Contig_3853	38	0.05749	573	0.967
dDocent_Contig_39457	109	0.05749	573	0.967
dDocent_Contig_31181	277	0.05749	573	0.967
dDocent_Contig_7533	35	0.05759	572	0.967
dDocent_Contig_42477	133	0.05759	572	0.967
dDocent_Contig_13589	209	0.05766	580	0.967
dDocent_Contig_30845	219	0.05769	571	0.967
dDocent_Contig_34443	88	0.05776	579	0.967
dDocent_Contig_37623	202	0.05779	570	0.967
dDocent_Contig_37623	231	0.05779	570	0.967
dDocent_Contig_14976	7	0.05796	577	0.967
dDocent_Contig_15088	96	0.058	568	0.967
dDocent_Contig_25309	137	0.058	568	0.967
dDocent_Contig_24050	197	0.05816	575	0.967
dDocent_Contig_49663	12	0.05841	564	0.967
dDocent_Contig_10881	74	0.05841	564	0.967
dDocent_Contig_25768	244	0.05841	564	0.967
dDocent_Contig_31909	130	0.05861	562	0.967
dDocent_Contig_9332	154	0.05861	562	0.967
dDocent_Contig_31909	165	0.05861	562	0.967
dDocent_Contig_53112	176	0.05861	562	0.967
dDocent_Contig_44534	69	0.05867	570	0.967
dDocent_Contig_6378	47	0.05872	561	0.967
dDocent_Contig_28508	93	0.05877	569	0.967
dDocent_Contig_35547	95	0.05882	560	0.967
dDocent_Contig_14914	214	0.05888	568	0.967
dDocent_Contig_11490	290	0.05893	559	0.967
dDocent_Contig_45629	9	0.05898	567	0.967
dDocent_Contig_1151	156	0.05908	566	0.967
dDocent_Contig_8298	14	0.05914	557	0.967
dDocent_Contig_28584	82	0.05929	564	0.967
dDocent_Contig_1283	10	0.05935	555	0.967
dDocent_Contig_23027	11	0.05946	554	0.967
dDocent_Contig_37317	109	0.05946	554	0.967
dDocent_Contig_17903	86	0.05971	560	0.967
dDocent_Contig_37289	111	0.05971	560	0.967
dDocent_Contig_39182	130	0.05971	560	0.967
dDocent_Contig_42406	173	0.05978	551	0.967
dDocent_Contig_9758	52	0.05982	559	0.967
dDocent_Contig_46502	200	0.05982	559	0.967
dDocent_Contig_57769	211	0.05982	559	0.967
dDocent_Contig_1402	252	0.05982	559	0.967
dDocent_Contig_15567	76	0.05989	550	0.967
dDocent_Contig_17888	159	0.05989	550	0.967
dDocent_Contig_43157	159	0.05989	550	0.967
dDocent_Contig_15567	246	0.05989	550	0.967
dDocent_Contig_17926	268	0.05993	558	0.967
dDocent_Contig_5132	124	0.06	549	0.967
dDocent_Contig_2878	157	0.06	549	0.967
dDocent_Contig_45627	230	0.06004	557	0.967
dDocent_Contig_13860	288	0.06011	548	0.967
dDocent_Contig_29246	189	0.06022	547	0.967
dDocent_Contig_26638	91	0.06025	555	0.967
dDocent_Contig_1686	162	0.06033	546	0.967
dDocent_Contig_16206	58	0.06036	554	0.967
dDocent_Contig_15173	43	0.06044	545	0.967
dDocent_Contig_31537	156	0.06044	545	0.967
dDocent_Contig_2596	40	0.06055	544	0.967
dDocent_Contig_13648	258	0.06055	544	0.967
dDocent_Contig_28015	10	0.06066	543	0.967
dDocent_Contig_12849	189	0.06069	551	0.967
dDocent_Contig_40566	251	0.06069	551	0.967
dDocent_Contig_40566	258	0.06069	551	0.967
dDocent_Contig_28339	21	0.0608	550	0.967
dDocent_Contig_7616	42	0.06089	541	0.967
dDocent_Contig_1795	155	0.06089	541	0.967
dDocent_Contig_25447	278	0.06089	541	0.967
dDocent_Contig_38336	215	0.06111	539	0.967
dDocent_Contig_14403	34	0.06113	547	0.967
dDocent_Contig_580	36	0.06113	547	0.967
dDocent_Contig_51204	183	0.06113	547	0.967
dDocent_Contig_6498	134	0.06122	538	0.967
dDocent_Contig_2159	198	0.06122	538	0.967
dDocent_Contig_1151	230	0.06122	538	0.967
dDocent_Contig_2159	267	0.06122	538	0.967
dDocent_Contig_8232	212	0.06124	546	0.967
dDocent_Contig_24011	124	0.06134	537	0.967
dDocent_Contig_3265	163	0.06136	545	0.967
[truncated: 24,989 more rows]
